1           **Dendrite branching receptor HPO-30 uses two novel mechanisms**  
2                           **to regulate actin cytoskeletal remodeling**

3

4 Daniel A. Kramer<sup>1</sup>, Heidy Y. Narvaez-Ortiz<sup>2</sup>, Rebecca Shi<sup>3,4</sup>, Kang Shen<sup>3,5</sup>, Julien Roche<sup>1</sup>, Brad  
5 J. Nolen<sup>2</sup>, and Baoyu Chen<sup>1#</sup>

6

7 **Affiliations:**

8 <sup>1</sup>Roy J Carver Department of Biochemistry, Biophysics, and Molecular Biology, Iowa State  
9 University, Ames, IA 50014, USA.

10 <sup>2</sup>Department of Chemistry and Biochemistry, Institute of Molecular Biology, University of  
11 Oregon, Eugene, OR 97403, USA.

12 <sup>3</sup>Department of Biology, Stanford University, Stanford, CA, 94305, USA

13 <sup>4</sup>Neurosciences IDP, Stanford University, Stanford, CA, 94305, USA

14 <sup>5</sup>Howard Hughes Medical Institute, Stanford University, Stanford, CA, 94305, USA

15 <sup>#</sup>Correspondence to: [stone@iastate.edu](mailto:stone@iastate.edu)

16 **Abstract**

17 Dendrite morphogenesis is essential to neural circuit formation, but the molecular  
18 mechanisms controlling the growth of complicated dendrite branches are not well understood.  
19 Prior studies using the highly branched *C. elegans* PVD sensory neuron identified a membrane  
20 co-receptor complex that transmits extracellular cues to intracellular actin remodeling machinery  
21 to promote high-order dendrite branching. In this complex, the transmembrane protein HPO-30  
22 recruits the WAVE regulatory complex (WRC) from the cytosol to dendrite branching sites,  
23 where WRC stimulates the Arp2/3 complex to polymerize actin. Here we report biochemical and  
24 structural characterization of this interaction, revealing that the intracellular domain (ICD) of  
25 HPO-30 uses two novel mechanisms to regulate the actin cytoskeleton. First, the unstructured  
26 HPO-30 ICD likely undergoes dimerization and induced folding to bind the WRC, with the  
27 binding simultaneously promoting WRC activation by the GTPase Rac1. Second, the dimerized  
28 HPO-30 ICD directly binds to both the sides and barbed end of actin filaments. The barbed end  
29 binding activity resembles that of the actin capping protein CapZ and prevents both actin  
30 polymerization and depolymerization. The novel dual functions of this dendrite receptor provide  
31 an intriguing model of how membrane proteins can use distinct mechanisms to fine-tune local  
32 actin dynamics.

33

## 34 **Introduction**

35           While neurons have vastly different shapes, they all share a similar architecture—one  
36 cell body, a long primary axon, and many branching protuberances called dendrites, along which  
37 are numerous micron-sized projections called spines (Burianek and Soderling, 2013; Jan and Jan,  
38 2003; Lefebvre et al., 2015). The formation of dendrites and spines is critical for the  
39 development of the nervous system, as they form the majority of post-synaptic connections in  
40 animals and directly determine the complex wiring of neural circuits (Hotulainen and  
41 Hoogenraad, 2010; Scott and Luo, 2001; Tavosanis, 2012). Dendrite development requires actin  
42 and microtubule filaments to drive the initiation and outgrowth of newly formed neurites (Cheng  
43 and Poo, 2012; Zhao et al., 2017). Defects in actin cytoskeletal regulation alter dendrite  
44 morphology and neural connections and contribute to many neurodevelopmental disorders, such  
45 as autism, mental retardation, and schizophrenia (Yan et al., 2016).

46           A central mechanism by which neurons control actin polymerization is through the  
47 Arp2/3 complex, a seven-protein complex that binds to the sides of existing actin filaments and  
48 initiates the formation of branched actin filament networks (Goley and Welch, 2006; Machesky  
49 et al., 1994; Pollard, 2007). Intrinsically inactive, the Arp2/3 complex requires activation by a  
50 group of proteins called nucleation promoting factors (NPFs). The Wiskott-Aldrich Syndrome  
51 Protein (WASP) family proteins are a major group of NPFs (Alekhina et al., 2017; Kramer et al.,  
52 2022; Pollitt and Insall, 2009; Takenawa and Suetsugu, 2007). They all contain a conserved  
53 WCA (WH2-central-acidic) sequence at their C terminus, which can directly bind to and activate  
54 Arp2/3, while their N-terminal sequences vary greatly and define their regulatory mechanism  
55 and cellular function (Alekhina et al., 2017; Kramer et al., 2022; Machesky and Insall, 1998).

56           Among the WASP-family proteins, WAVE (Wiskott-Aldrich Verprolin homology) exists  
57 in a multi-protein complex named the WAVE regulatory complex (WRC), which contains five  
58 subunits: Sra1, Nap1, Abi2, HSPC300, and WAVE (or their corresponding orthologs in  
59 vertebrates) (Chen et al., 2010; Eden et al., 2002; Gautreau et al., 2004; Poleskaya et al., 2021;  
60 Rottner et al., 2021). Enriched in neurons, the WRC and Arp2/3 complex promote actin  
61 polymerization downstream of membrane signaling to drive various neuronal activities,  
62 including growth cone formation, axon branching, dendrite branching, synapse formation, and  
63 axon guidance and projection (Chia et al., 2014; Chou and Wang, 2016; Pilpel and Segal, 2005;  
64 Racz and Weinberg, 2008; Soderling et al., 2007; Stephan et al., 2011; Tahirovic et al., 2010;

65 Yamazaki et al., 2005; Yokoyama et al., 2011). Disrupting the WRC in animals profoundly  
66 impacts the nervous system, leading to altered spine morphology and density, intellectual  
67 disability, as well as embryonic death (Dahl et al., 2003; Soderling et al., 2003). Mutations in  
68 WAVE and other subunits of the WRC lead to a variety of neurodevelopmental disorders in  
69 human patients, including neurodevelopmental disorder with absent language and variable  
70 seizures (NEDALVS), developmental and epileptic encephalopathy-65 (DEE-65), and  
71 Alzheimer's disease (Begemann et al., 2021; Conway et al., 2018; Ito et al., 2018; Kirkpatrick et  
72 al., 2017; Kramer et al., 2022; Kumar et al., 2013; Olive et al., 2020; Rottner et al., 2021;  
73 Shimojima Yamamoto et al., 2021; Sims et al., 2017; Srivastava et al., 2021; Zhao et al., 2021;  
74 Zweier et al., 2019).

75 The WRC keeps WAVE basally inhibited by sequestering its C-terminal WCA to a  
76 conserved surface formed by both the Sra1 and WAVE subunits (Chen et al., 2017, 2010a; Eden  
77 et al., 2002; Kramer et al., 2022). Through direct interactions, various molecules can recruit the  
78 WRC to the membrane and/or simultaneously activate it, which releases the WCA to promote  
79 Arp2/3-mediated actin polymerization. These ligands include small GTPases (e.g., Rac1 and  
80 Arf), acidic phospholipids (e.g., PIP<sub>3</sub>), various adaptor proteins, and over 100 different  
81 membrane proteins that contain a 6 amino acid peptide motif named the WIRS motif (WRC  
82 interacting receptor sequence, defined as  $\Phi$ -x-T/S-F-x-x, where  $\Phi$  is a bulky hydrophobic  
83 residue and x is any residues) (Chen et al., 2017, 2014a, 2010a; Eden et al., 2002; Kobayashi et  
84 al., 1998; Koronakis et al., 2011; Lebensohn and Kirschner, 2009; Rottner et al., 2021). Many  
85 WIRS-containing membrane proteins, such as SYG-1, Robo, Neogenin, TMEM132, neuroligins,  
86 and various protocadherins, are important neuronal receptors and have been shown to rely on the  
87 WIRS-WRC interaction to regulate various processes in neural development (Chaudhari et al.,  
88 2021; Chia et al., 2014; Fan et al., 2018; Lee et al., 2016; Wang et al., 2021; Xing et al., 2018).

89 Previous studies identified the claudin-like dendrite receptor HPO-30 as a novel WRC  
90 binding protein, and this interaction was essential to higher-order dendrite branching. HPO-30  
91 acts as a co-receptor of the cell adhesion molecule DMA-1 in the PVD sensory neuron in *C.*  
92 *elegans*. The extracellular domain of DMA-1 forms a multi-ligand complex with the secreted  
93 protein LECT-2 and the extracellular domains of the epidermis cell receptors SAX-7 and MNR-1  
94 (Zou et al., 2016). These interactions provide the spatial cue for initiating dendrite branching  
95 (Dong et al., 2013; Zou et al., 2016, 2018). The intracellular domain (ICD) of HPO-30 directly



96 binds the WRC, while the ICD of DMA-1 binds the Rac guanine nucleotide exchange factor  
97 (GEF) TIAM-1, which can increase the local concentration of activated Rac1—the canonical  
98 activator of WRC (Tang et al., 2019). Together, HPO-30 and DMA-1 organize a multi-protein  
99 complex to spatiotemporally coordinate extracellular cues with the intracellular actin remodeling  
100 essential to high-order dendrite branching (Zou et al., 2018).

101 It is unclear how the HPO-30 ICD interacts with the WRC. It is also unknown if, in  
102 addition to binding to the WRC, the HPO-30 ICD has other functions. The HPO-30 ICD does not  
103 contain a WIRS motif and must use a non-WIRS mechanism to interact with the WRC. Previous  
104 studies showed that deleting the C-terminal part of the HPO-30 ICD strongly affected WRC  
105 binding *in vitro* and high-order dendrite branching *in vivo*, but it was unclear whether the HPO-  
106 30 ICD used a linear peptide motif analogous to WIRS to bind the WRC (Zou et al., 2018).  
107 Furthermore, although HPO-30 is homologous to the tight junction claudin proteins in mammals,  
108 its ICD sequence is only conserved in nematode worms. Nevertheless, this ICD binds to both *C.*  
109 *elegans* and human WRC, suggesting that the interaction mechanism is conserved in other  
110 animals (Zou et al., 2018). It is likely that humans have an unidentified membrane protein that  
111 uses the same interaction surface to regulate the WRC. Thus, it is important to understand the  
112 mechanism underlying the interaction between HPO-30 and WRC.

113 Here we report biochemical and structural analysis of the HPO-30-WRC interaction. We  
114 find that, unlike other WRC-interacting receptors known to date, the HPO-30 ICD requires  
115 dimerization and folding into a three-dimensional structure to bind the WRC. Furthermore, to  
116 our surprise, we find the HPO-30 ICD directly interacts with actin filaments, also in a  
117 dimerization-dependent manner. The dimeric form binds to both the side and barbed end of actin  
118 filaments and inhibits both actin polymerization and depolymerization, resembling the activity of  
119 the actin capping protein CapZ. The dual activities of HPO-30 ICD provide an intriguing  
120 example of how a membrane receptor can regulate actin dynamics by simultaneously controlling  
121 the localization of a central actin nucleation factor and modulating local actin networks to  
122 promote an important biological process.

123

124

125

126

127 **Results**

128 **HPO-30 ICD may use a folded structure, instead of a short peptide motif, to bind the WRC**

129 The HPO-30 ICD (or ICD for short hereafter) does not contain a WIRS motif. Therefore,  
130 we first hypothesized it might use a distinct linear motif to bind the WRC. To identify this  
131 sequence motif, we mutated every five residues to alanine throughout the ICD and used GST  
132 pull-down assays to evaluate how they disrupted WRC binding (**Figure 1A**). Interestingly, we  
133 found that mutating nearly any five amino acids (a.a.), except for the fourth and tenth region,  
134 significantly reduced the binding to WRC, with the middle region of the ICD showing the  
135 strongest effect ( $\Delta 5, 6, 7$  in **Figure 1A,B**, lanes 7-9). This is consistent with the previous  
136 qualitative data obtained in a less ideal pull-down condition (Zou et al., 2018). It was intriguing  
137 that none of these 5-a.a. mutations completely abolished the binding to WRC, unlike WIRS-  
138 mediated binding, where mutating the WIRS motif readily diminished the interaction (Chen et  
139 al., 2014a). This is consistent with our quantitative measurement of the binding affinity using  
140 equilibrium pull-down (EPD) assays, in which the wild type (WT) ICD had a dissociation  
141 constant ( $K_D$ ) of  $\sim 1.69 \mu\text{M}$  (**Figure 1D**, black). Alanine mutant  $\Delta 5$ , which had the strongest  
142 effect in the non-equilibrium pull-down assays (**Figure 1A,B**, lane 7), increased the  $K_D$  only  
143 mildly to  $\sim 5.06 \mu\text{M}$ , still maintaining significant binding (**Figure 1D**, purple) (Chen et al., 2017;  
144 Kuzmic, 1996; Pollard, 2010). By contrast, replacing either the entire N-terminal or C-terminal  
145 sequences, or two consecutive 5-a.a. mutations with a (GGG) sequence almost completely  
146 abolished the binding (**Figure 1A,C**  $\Delta 11-14$ ). Note that while most mutants contain a GST-tag at  
147 the N-terminus, the 5-a.a. mutations located at the C-terminus of the ICD contain a GST-tag at  
148 the C-terminus ( $\Delta 8-10$  in **Figure 1**, lanes 10-13 in **Figure 1B**), which we found was necessary to  
149 protect the mutant ICDs from degradation (data not shown).

150 Nearly all of the 5-a.a. alanine scan mutants affected WRC binding. This is distinct from  
151 WIRS-containing proteins, where only mutations in the WIRS motif disrupted binding (Chen et  
152 al., 2014a). We hypothesized that, instead of using a short linear peptide motif like WIRS, either  
153 the HPO-30 ICD folds into a three-dimensional structure and uses the folded structure to bind the  
154 WRC, or the entire sequence binds as a long linear peptide that interacts extensively with the  
155 WRC. We favor the first hypothesis because it is supported by both secondary structure analysis  
156 from various programs, including JPred, PredictProtein, PSIPred, and SABLE, and *ab initio*  
157 tertiary structure prediction by many different algorithms, including LOMETS, QUACK,

158 RaptorX, Rosetta, AlphaFold 2.0, and RoseTTAFold, (**Figure 1E; Figure 1—figure**  
 159 **supplement 1**) (Adamczak et al., 2004; Bernhofer et al., 2021; Bonneau et al., 2001;  
 160 Drozdetskiy et al., 2015; Jumper et al., 2021; Källberg et al., 2012; McGuffin et al., 2000;  
 161 Minkyung et al., 2021; Wu and Zhang, 2007). Nearly all predictions suggest the ICD contains a  
 162 short alpha helix at the N-terminus followed by two beta strands, which together could adopt  
 163 various three-dimensional structures. The predicted structures vary depending on the program  
 164 used and the context of ICD sequence (isolated vs. within the full-length HPO-30), suggesting  
 165 the ICD structure is likely unstable and can adopt diverse conformations (**Figure 1E; Figure 1—**  
 166 **figure supplement 1**). Together, the above mutagenesis and structural analysis suggest that  
 167 HPO-30 ICD likely uses a folded tertiary structure, instead of a linear peptide motif, to bind to  
 168 the WRC.

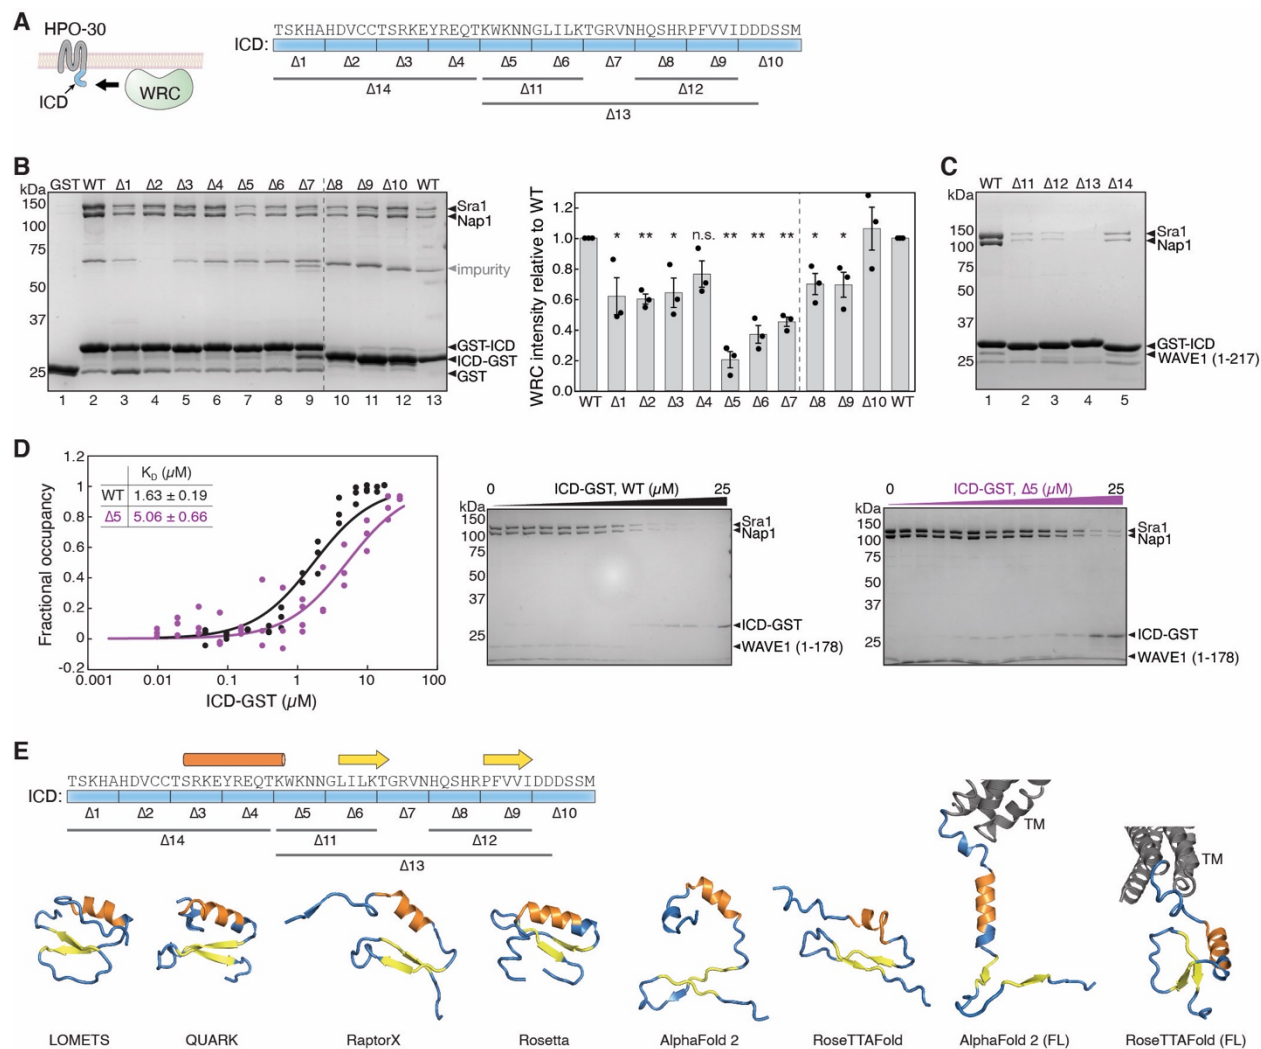

169

170 **Figure 1. HPO-30 binds to WRC likely using a folded domain, rather than a linear peptide motif. (A)**  
171 Left: cartoon representation of HPO-30 as a four-pass transmembrane protein, with the ICD binding to the  
172 WRC. Right: annotation of HPO-30 ICD sequence and mutants used in this study. Each mutant replaces the  
173 corresponding amino acids to alanines (for  $\Delta 1-10$ ) or (GGG)<sub>n</sub> (for  $\Delta 11-14$ ). **(B)** Representative Coomassie  
174 blue-stained SDS PAGE gel (left) and quantification (right) of three independent experiments showing GST-  
175 ICD (lane 2-9, 200 pmol) and ICD-GST (lane 10-13, 200 pmol) pulling down WRC<sup>230 $\Delta$ WCA</sup> (150 pmol).  
176 Sra1/Nap1 band intensity was used to quantify the pull-down signals of WRC. Signals from GST-ICD or ICD-  
177 GST pull-downs were normalized to corresponding ICD WT (lane 2 and 13, respectively). Error bars represent  
178 standard error, \*  $p < 0.05$ , \*\*  $p < 0.005$  from Student's paired t-test. **(C)** Coomassie blue-stained SDS PAGE  
179 gel showing GST-ICD  $\Delta 11-14$  mutants (200 pmol) pulling down WRC<sup>217 $\Delta$ WCA</sup> (300 pmol). **(D)** EPD assay to  
180 measure the dissociation constant ( $K_D$ ) of the interaction between ICD-GST and WT. Left: data pooled from  
181 three independent repeats were fitted to a one-site binding model using DynaFit. Right: representative  
182 Coomassie blue-stained SDS PAGE gels used for quantification. **(E)** Consensus secondary structure (top) and  
183 tertiary structures of HPO-30 ICD predicted by indicated programs (bottom, same color scheme as the  
184 secondary structure annotation). "FL" indicates structural predictions of ICD in the context of full length (FL)  
185 HPO-30.

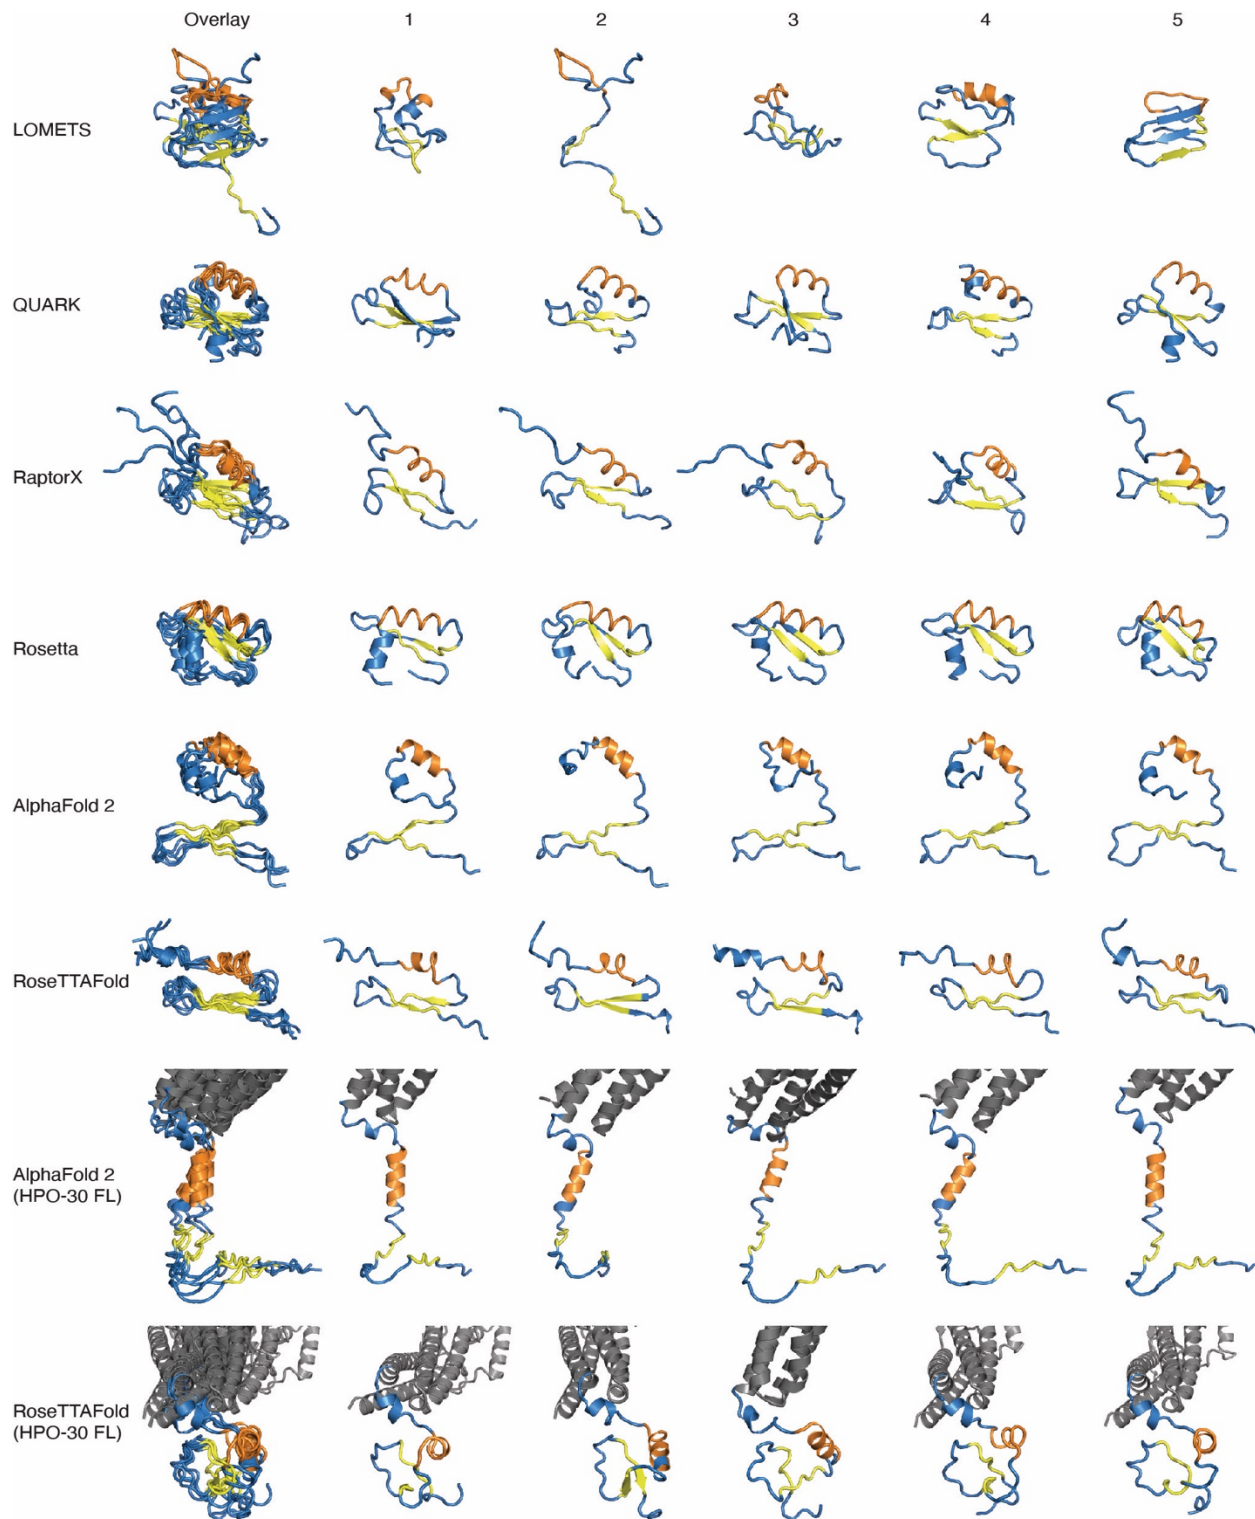

186

187 **Figure 1—figure supplement 1.** Top five predicted structures of HPO-30 ICD by the indicated programs.

188

189



190 **HPO-30 ICD is disordered in solution**

191 We tried several approaches to determine the structure of the HPO-30 ICD in isolation.  
192 The ICD did not grow crystals either by itself or when attached to solubility tags, or as a co-  
193 crystal with the WRC. However, due to its small size and our improved protocol to purify the  
194 isotope-labeled ICD in high concentration, we were able to use solution nuclear magnetic  
195 resonance (NMR) spectroscopy to obtain well-resolved  $^1\text{H}$ - $^{15}\text{N}$  HSQC spectra of untagged  $^{15}\text{N}$ -  
196 labeled ICD (**Figure 2A**). From the spectra of the untagged ICD, we could readily identify 50  
197 distinct amide crosspeaks out of the 51 we predicted to observe. The narrow  $^1\text{H}$  chemical shift  
198 dispersion suggests that the HPO-30 ICD is predominantly disordered in solution, with little  
199 indications of secondary structure formation. To further increase the stability and yield of  
200 untagged ICD, we switched to using GB1-ICD (GB1 is a monomeric, small soluble tag  
201 commonly used in NMR) (Zhou and Wagner, 2010). Comparison of the 2D  $^1\text{H}$ - $^{15}\text{N}$  TROSY-  
202 HSQC spectra collected for GB1-ICD with the isolated ICD (**Figure 2B**, blue) and with the  
203 isolated GB1 (**Figure 2C**, red) showed no significant chemical shift changes. This suggests that  
204 HPO-30 ICD remains largely disordered even when it is linked to a well-folded protein like  
205 GB1. Furthermore, the NMR spectra were nearly identical at different protein concentrations (50  
206 – 700  $\mu\text{M}$ ) and different temperatures (283 K – 298 K), suggesting the ICD alone does not  
207 undergo structural changes in a concentration-dependent manner (data not shown).

208 This result was consistent with the circular dichroism (CD) spectrum of the ICD, in  
209 which no major peaks at either the beta-sheet wavelength (positive at 195 nm and negative at 217  
210 nm) or the alpha-helix wavelengths (positive at 193 nm and negative at 218 and 222 nm) were  
211 observed, in contrast to the spectrum of bovine serum albumin (BSA) obtained in the same  
212 conditions, which shows clear peaks associated with both structural elements (**Figure 2E**).  
213 Addition of an osmolyte, trimethylamine N-oxide (TMAO), which is commonly used to promote  
214 protein folding, did not cause a significant change to the CD spectrum or enhance the ICD-WRC  
215 interaction (**Figure 2—figure supplement 1**) (Baskakov et al., 1999). Together, these data  
216 suggest the purified ICD is unstructured in solution.

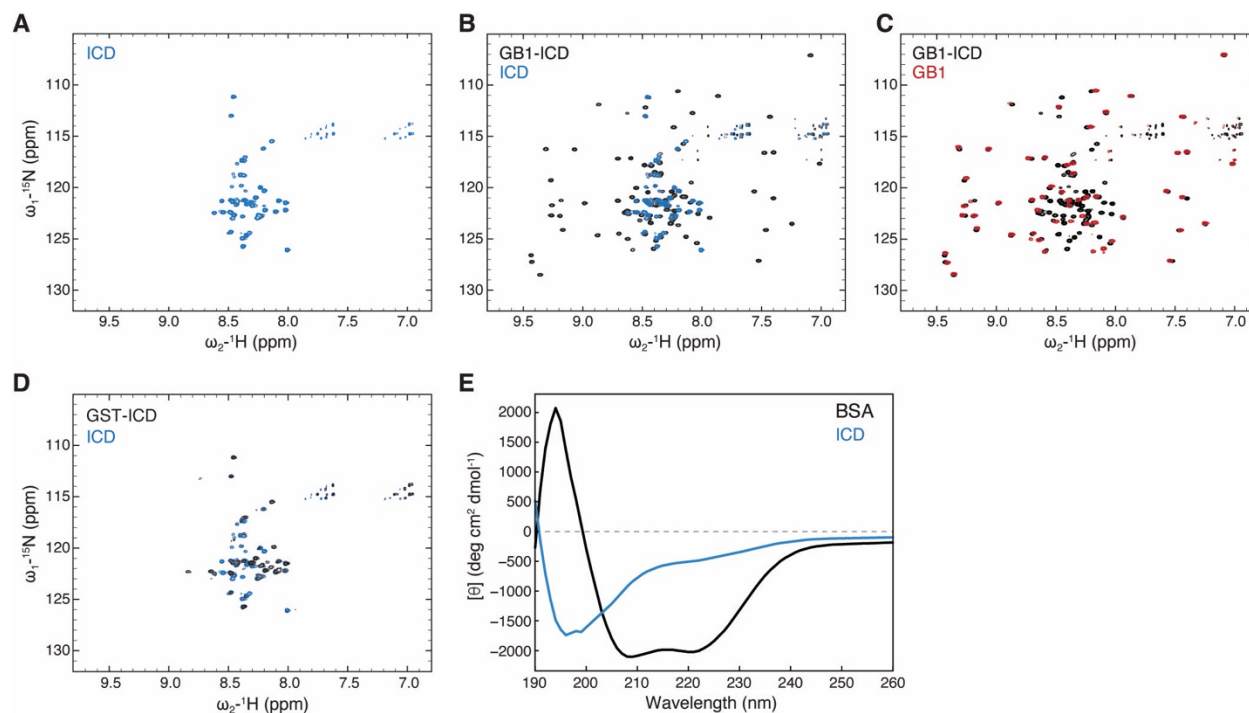

217  
 218 **Figure 2. HPO-30 ICD alone is unstructured.** (A-D) 2D TROSY spectra of untagged HPO-30 ICD (A), GB1-ICD  
 219 (B), GB1 (C) and GST-ICD (D) in the same buffer condition (100 mM NaCl, 10 mM HEPES pH 7.0, and 5%  
 220 glycerol). (E) CD spectrum of 2 mg/mL untagged HPO-30 ICD or BSA in 50KMEH5Gd (see Methods and  
 221 Materials).

222

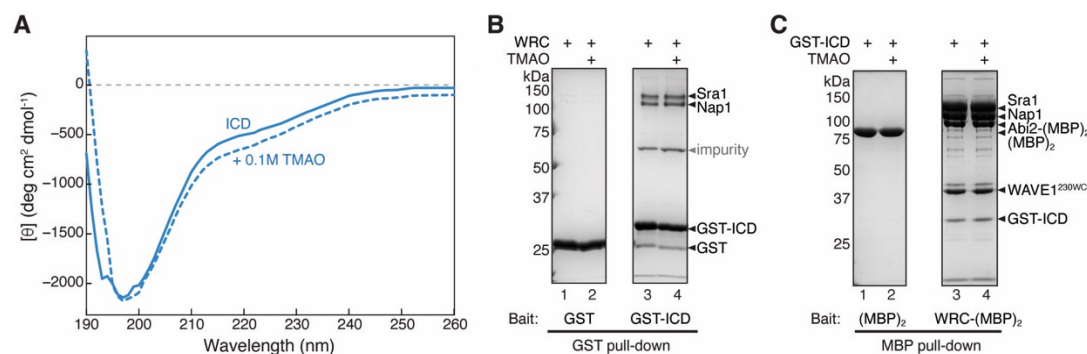

223  
 224 **Figure 2—figure supplement 1.** (A) CD spectrum of 2 mg/mL HPO-30 ICD in the absence or presence of 0.1 M  
 225 TMAO. (B-C) Coomassie blue-stained SDS PAGE gels showing GST-ICD (200 pmol) pulling down WRC<sup>C230ΔWCA</sup>  
 226 (150 pmol) (B) or WRC-(MBP)<sub>2</sub> (60 pmol) pulling down GST-ICD (600 pmol) (C) with and without TMAO.

227

## 228 **Dimerization is required for HPO-30 ICD to bind WRC**

229 How can the unstructured HPO-30 ICD use a folded structure to bind the WRC? While  
 230 attempting to solve this conundrum, we realized that the GST-tagged constructs used in our pull-

231 down assays would dimerize the ICD, as GST is a constitutive dimer (Askelöf et al., 1975). We  
232 then hypothesized that the HPO-30 ICD may need to be dimerized for efficient binding to the  
233 WRC. To test this hypothesis, we repeated the pull-down assay after switching the GST tag to  
234 the monomeric tag MBP (maltose binding protein) (**Figure 3A**). Consistent with our hypothesis,  
235 the MBP-tagged ICD indeed showed much weaker binding to the WRC (**Figure 3B**, right).  
236 Further supporting the observation that monomeric ICD does not bind to the WRC effectively,  
237 GST-ICD binding could not be competed off by a chemically synthesized peptide covering the  
238 whole HPO-30 ICD, even when the peptide was added in 5000-fold excess (**Figure 3—figure**  
239 **supplement 1A**).

240 We next tested several different strategies to further validate if dimerization of the ICD is  
241 required for WRC binding. First, we immobilized the WRC to the affinity beads by tethering a  
242 dual MBP tag, (MBP)<sub>2</sub>, to the WRC to pull down different monomeric vs. dimeric forms of  
243 HPO-30 ICD. To our surprise, the WRC containing an (MBP)<sub>2</sub> tag at the N-terminus of  
244 HSPC300, which was previously used to immobilize the WRC and pull down WIRS-containing  
245 proteins (Chen et al., 2014a), substantially reduced HPO-30 ICD binding (**Figure 3—figure**  
246 **supplement 1C**, lane 6 vs. 8). Similarly, an (MBP)<sub>2</sub> tag at the N-terminus of Abi2 also prevented  
247 HPO-30 ICD binding (**Figure 3—figure supplement 1B**). These data suggest tagging (MBP)<sub>2</sub> at  
248 the N-terminus of HSPC300 or Abi2 may interfere with the HPO-30 ICD binding surface (but  
249 not the WIRS binding surface). We eventually used sortase-mediated protein ligation (Chen et  
250 al., 2011) to tether an (MBP)<sub>2</sub> tag to the C-terminus of Abi2, which produced a WRC that  
251 efficiently bound to amylose beads and effectively retained HPO-30 ICD binding (**Figure 3—**  
252 **figure supplement 1C**). Using this construct, we observed robust binding of all dimeric  
253 constructs we tested, including GST-ICD, ICD-GST, and DLC8-ICD (DLC8 is a constitutive  
254 dimer from the dynein light chain) (Wang et al., 2003). By contrast, all monomeric constructs,  
255 including GB1-ICD, sumo-ICD, and mEGFP-ICD showed very weak, if any, binding (**Figure**  
256 **3A,C**).



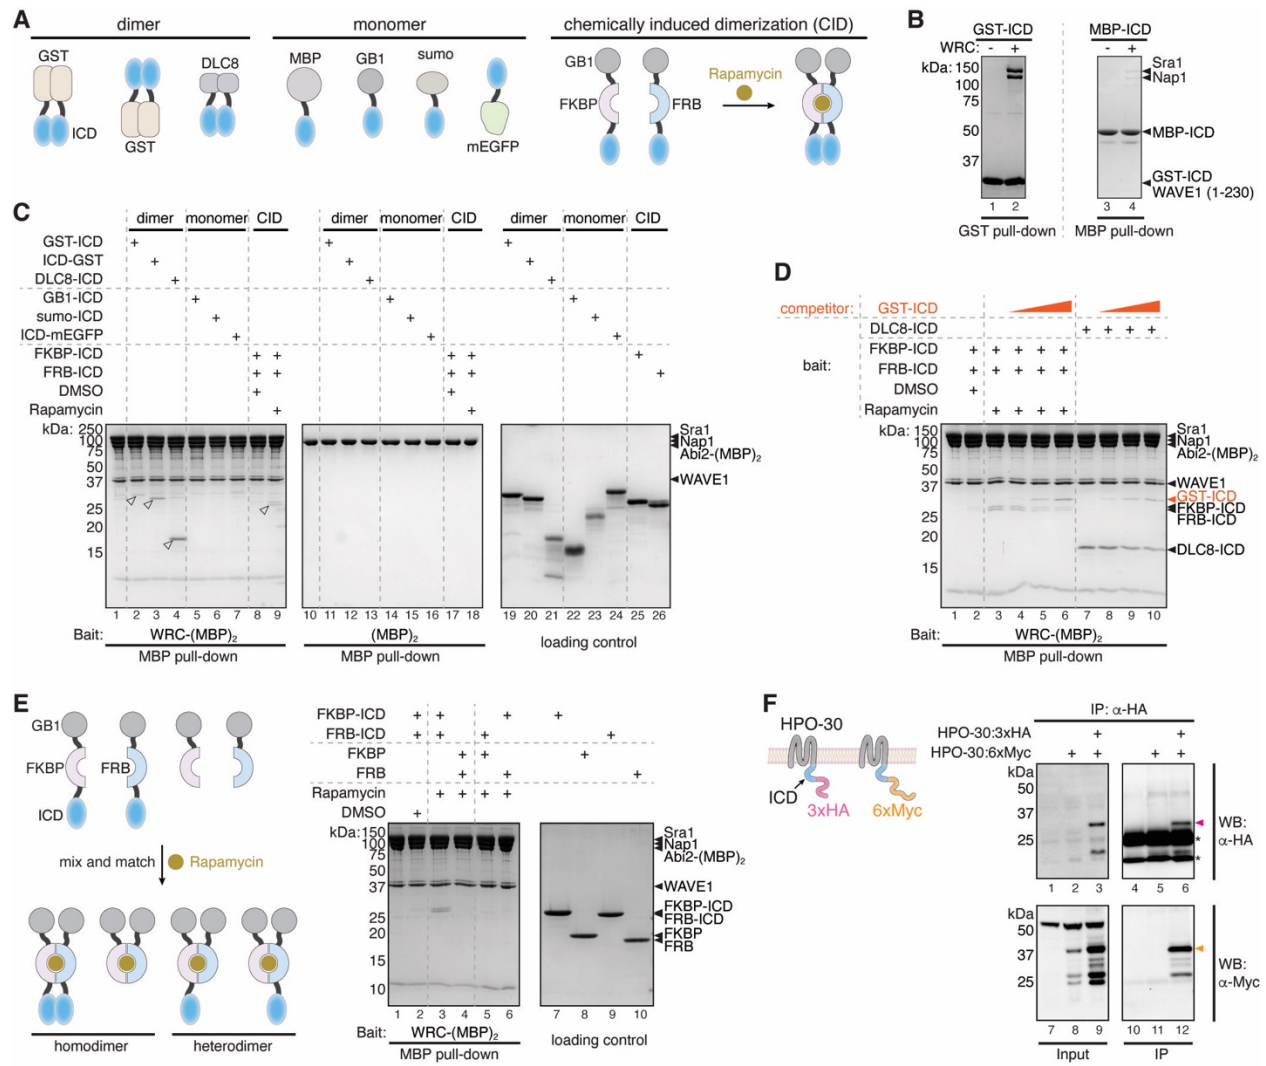

257

258 **Figure 3. HPO-30 ICD binding to the WRC is enhanced by dimerization.** (A) Schematic of HPO-30 ICD  
 259 constructs used in this study. (B) Coomassie blue-stained SDS PAGE gels showing GST-ICD or MBP-ICD (200  
 260 pmol) pulling down WRC<sup>230ΔWCA</sup> (200 pmol). (C) Coomassie blue-stained SDS PAGE gels showing WRC-(MBP)<sub>2</sub>  
 261 or (MBP)<sub>2</sub>-WRC (60 pmol) pulling down various monomeric and dimeric HPO-30 ICD (600 pmol) indicated in (A).  
 262 Where it is noted, 5 μM rapamycin (vs. equal volume of DMSO as a negative control) was used to induced  
 263 dimerization. White arrowheads indicate pull-down signals. For clarity, GB1-FKBP-ICD and GB1-FRB-ICD were  
 264 referred to as FKBP-ICD and FRB-ICD, respectively. (D) Coomassie blue-stained SDS PAGE gels showing WRC-  
 265 (MBP)<sub>2</sub> (60 pmol) pulling down different dimeric HPO-30 ICD (600 pmol) in the presence of GST-ICD as a  
 266 competitor (600 to 6000 pmol). (E) Schematic of the assembly of homo- and heterodimers of HPO-30 ICD (left) and  
 267 Coomassie blue-stained SDS PAGE gels (right) showing WRC-(MBP)<sub>2</sub> (60 pmol) pulling down indicated homo-  
 268 and heterodimers. In homo- and heterodimers, 1200 pmol of ICD monomeric unit was included to ensure the total  
 269 amount of ICD remained the same. (F) Schematic of full-length HPO-30 constructs co-expressed in *Drosophila* S2  
 270 cells (left) and Western blot images (right) showing co-immunoprecipitation of 3xHA-tagged HPO-30 (pink  
 271 arrowhead) with 6xMyc-tagged HPO-30 (orange arrowhead). Asterisks indicate light and heavy chain of antibody.

272

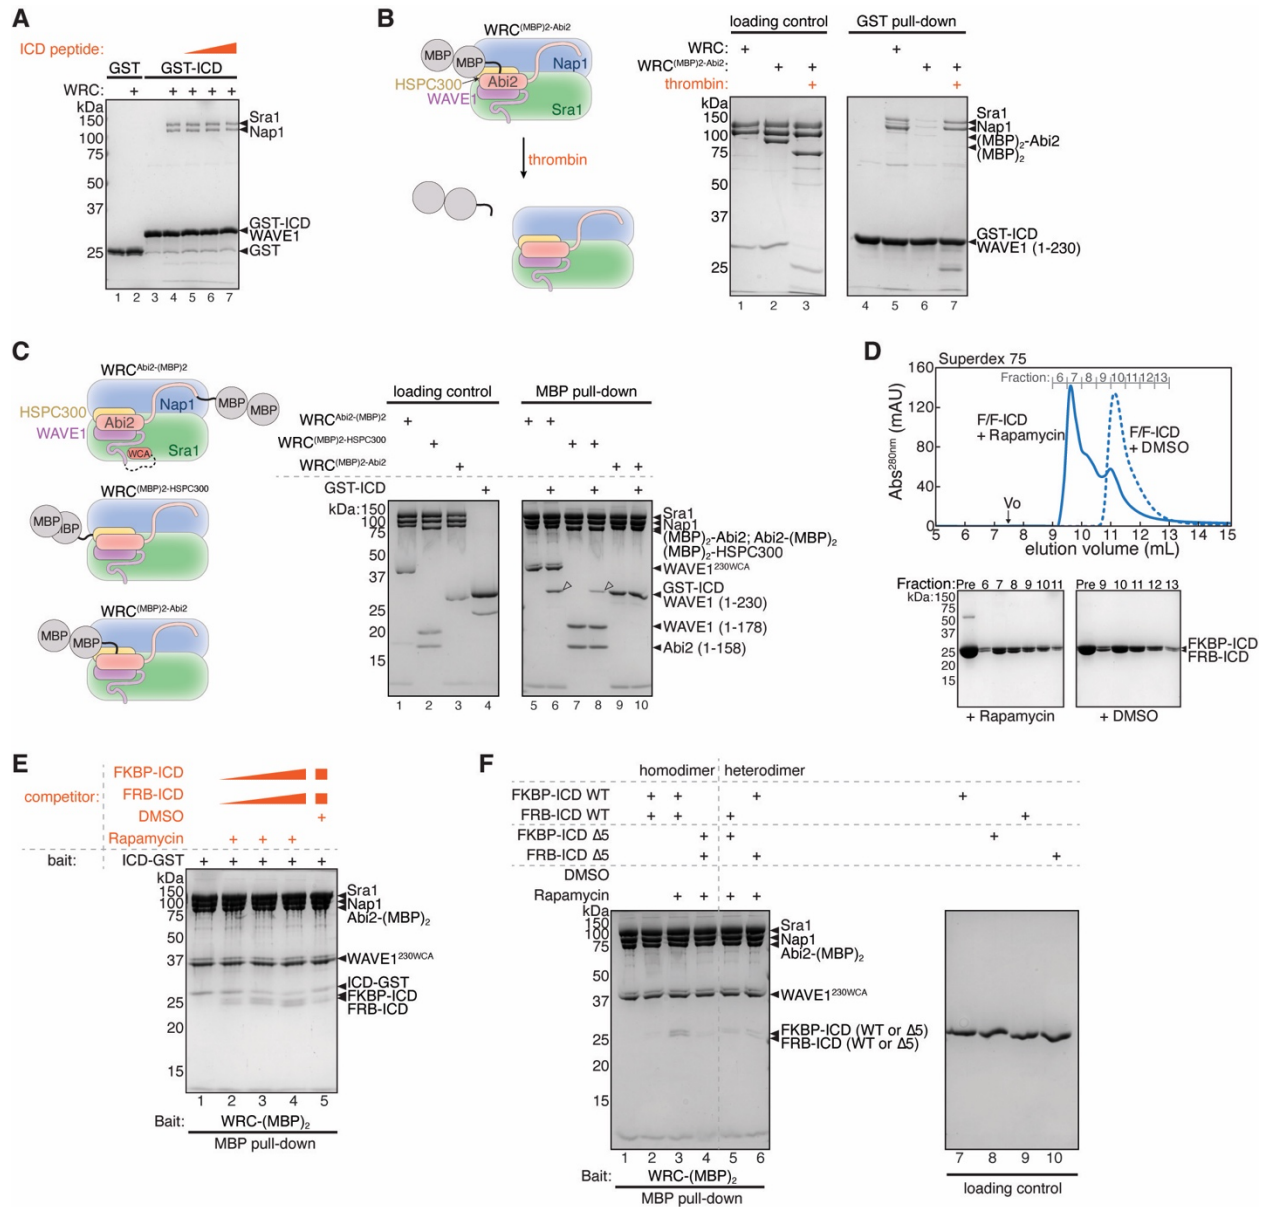

273

274 **Figure 3—figure supplement 1. Additional data supporting HPO-30 ICD binding to WRC is enhanced by**

275 **dimerization.** (A) Coomassie blue-stained SDS PAGE gel showing GST-ICD (200 pmol) pulling down

276 WRC<sup>230ΔWCA</sup> (150 pmol) in the presence of a chemically synthesized HPO-30 ICD peptide as a competitor (18-100

277 nmol). (B) Schematic of removing (MBP)<sub>2</sub> tag from WRC<sup>(MBP)<sub>2</sub>-Abi2</sup> by thrombin cleavage (left) and Coomassie blue-

278 stained SDS PAGE gels (right) comparing GST-ICD (200 pmol) pulling down WRC<sup>(MBP)<sub>2</sub>-Abi2</sup> (150 pmol) before or

279 after removal of the (MBP)<sub>2</sub> tag. (C) Schematic of (MBP)<sub>2</sub>-tagged WRC constructs (left) and Coomassie blue-

280 stained SDS PAGE gels showing indicated (MBP)<sub>2</sub>-tagged WRC (60 pmol) pulling down GST-ICD (600 pmol).

281 White arrowheads indicated pull-down signals. (D) Top: gel filtration chromatograms of equimolar GB1-FKBP-ICD

282 and GB1-FRB-ICD in the presence or absence of 5 μM rapamycin (or equal volume of DMSO). Bottom: Coomassie

283 blue-stained SDS-PAGE gels of the indicated gel filtration fractions. (E) Coomassie blue-stained SDS PAGE gel

284 showing WRC-(MBP)<sub>2</sub> (60 pmol) pulling down ICD-GST (600 pmol) in the presence of FKBP/FRB-ICD as a  
 285 competitor (600 – 6000 pmol). **(F)** Coomassie blue-stained SDS PAGE gels showing WRC-(MBP)<sub>2</sub> (60 pmol)  
 286 pulling down different combinations of homo- and heterodimers of WT and Δ5 HPO-30 ICD (in which WT ICD  
 287 monomeric unit was kept at 1200 pmol to ensure the same amount of the WT ICD was included in the reactions).  
 288

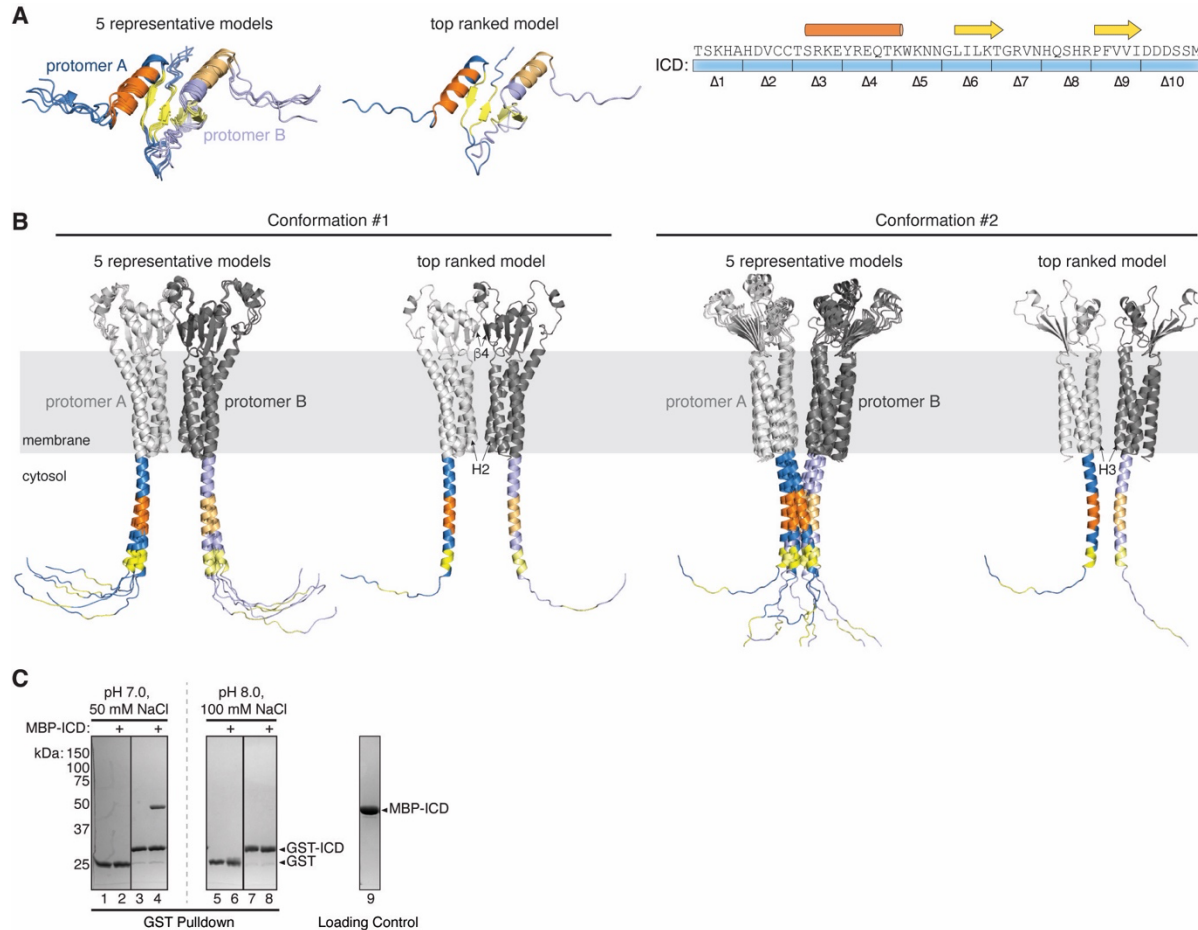

289  
 290 **Figure 3—figure supplement 2. HPO-30 can potentially form a dimer.** (A) AlphaFold Multimer predictions of  
 291 the isolated HPO-30 ICD dimer. Promoter A is colored using the same scheme shown on the right (and in Figure  
 292 1E), while protomer B is shown in lighter colors. (B) Two distinct dimer conformations of the full-length HPO-30  
 293 predicted by AlphaFold Multimer. (C) Coomassie blue-stained SDS PAGE gels showing GST-ICD (200 pmol)  
 294 pulling down MBP-ICD (6000 pmol) in indicated buffer conditions.

295  
 296 To further exclude the possibility that the affinity tags nonspecifically affected protein  
 297 interaction, we introduced the chemically inducible dimerization (CID) tags FKBP and FRB to  
 298 the ICD, with the GB1 tag at the N-terminus to improve protein expression and solubility  
 299 (Banaszynski et al., 2005) (**Figure 3A**). In the presence of the dimerizing agent rapamycin, GB1-

300 FKBP-ICD and GB1-FRB-ICD can readily form a tight heterodimer (**Figure 3A**), as confirmed  
301 by size exclusion chromatography in the presence and absence of rapamycin (**Figure 3—figure**  
302 **supplement 1D**). Consistent with results from the above constitutive dimeric tags, the addition  
303 of rapamycin to dimerize GB1-FKBP/FRB-ICD (F/F-ICD for short hereafter) clearly promoted  
304 HPO-30 ICD binding (**Figure 3C**, lanes 8 vs. 9).

305 To ensure that the ICDs that contain different dimerization tags bind to the WRC using  
306 the same mechanism, we used competition pull-down assays to compare different dimeric  
307 constructs. We found GST-ICD effectively competed off both F/F-ICD and DLC8-ICD binding  
308 to the WRC in a dose-dependent manner (**Figure 3D**, lanes 4-6 and 8-10). Complementarily,  
309 F/F-ICD effectively competed off GST-ICD binding to WRC only in the presence of rapamycin,  
310 while in the absence of rapamycin the competition efficiency was significantly reduced (**Figure**  
311 **3—figure supplement 1E**, lanes 4 and 5). These data further corroborate the notion that  
312 dimerized ICD promotes WRC binding, and that all dimeric constructs tested so far bind WRC  
313 using the same mechanism.

314 As an alternative way to validate that dimerization of the HPO-30 ICD is required for  
315 WRC binding, we mixed different GB1-FKBP/FRB constructs to produce various heterodimers  
316 of the ICD. We found that a heterodimer containing either only one ICD (by mixing with empty  
317 GB1-FKBP or FRB tag) or having one WT ICD and an alanine  $\Delta 5$  mutant ICD failed to support  
318 binding to the WRC to the same level as a homodimer containing two WT ICDs (**Figure 3E**;  
319 **Figure 3—figure supplement 1F**). Note that in this experiment we kept the total concentration  
320 of the WT ICD monomeric unit the same between heterodimers and homodimer. Therefore, the  
321 lack of binding from heterodimers was due to lack of the WT ICD dimer, but not reduced WT  
322 ICD concentration.

323 If the ICD needs to be dimerized in order to bind the WRC, we speculated HPO-30  
324 should be able to form dimers in the cell. To test this hypothesis, we expressed 3xHA-tagged and  
325 6xMyc-tagged full-length HPO-30 in *Drosophila* S2 cells and used co-immunoprecipitation to  
326 test if HPO-30 interacted with itself (**Figure 3F**). We found 3xHA-tagged HPO-30 robustly  
327 retained 6xMyc-tagged HPO-30, suggesting that full-length HPO-30 is capable of dimerization  
328 (or oligomerization) in cells, which could be the functional form of HPO-30. With recent  
329 advances in protein structural prediction by AlphaFold, we used AlphaFold Multimer (AFM) to  
330 predict whether and how the isolated ICD or the full-length HPO-30 can form a dimer (**Figure**



331 **3—figure supplement 2A,B)** (Evans et al., 2022; Jumper et al., 2021). We found the ICD alone  
332 was consistently predicted to form a homodimer. Out of 25 prediction solutions, 20 solutions  
333 show the same conformation in which dimerization is mediated by a beta sheet formed by the  
334 two beta strands from each ICD (**Figure 3—figure supplement 2A**). Consistent with this  
335 prediction, purified GST-ICD was able to pull down MBP-tagged ICD in a pH and salt  
336 dependent manner, which suggests the dimerization of ICD is mediated through polar  
337 interactions (**Figure 3—figure supplement 2C**). The full-length HPO-30 was also predicted to  
338 form dimers, but with two distinct conformations. In the first conformation, dimerization was  
339 mediated by the interactions between the transmembrane helix 2 (H2) and the beta strand 4 ( $\beta$ 4)  
340 in the extracellular domain, while in the second conformation, dimerization was mediated by  
341 transmembrane helix 3 (H3) and the first helix of the ICD (**Figure 3—figure supplement 2B**).  
342 In both conformations, the ICD was predicted to form a long helix, without two beta strands.  
343 This contradicts the secondary structural predictions and tertiary structural predictions of the  
344 isolated ICD by all other methods, likely because the global prediction of the full-length HPO-30  
345 somehow influenced the prediction of the ICD due to the dominant structures of the N-terminal  
346 regions (**Figure 1E; Figure 1—figure supplement 1; Figure 3—figure supplement 2A**).

347 Taken together, our data suggest that HPO-30 ICD has the potential to dimerize both *in*  
348 *vitro* and in cells, and the dimerization is required for efficient binding to the WRC.

349

### 350 **Dimerization is not sufficient to induce HPO-30 ICD folding**

351 As the dimeric ICD binds to the WRC more strongly than the monomeric form, we used  
352 NMR to determine if dimerization could induce structure changes in the HPO-30 ICD. Among  
353 various dimerized ICD constructs, only GST-ICD could produce protein at a high enough  
354 concentration for NMR measurement. With this material, we managed to obtain well-resolved  
355  $^1\text{H}$ - $^{15}\text{N}$  TROSY-HSQC spectra, which showed  $^1\text{H}$  chemical shift dispersion nearly identical to  
356 the untagged ICD, indicating that dimerization alone was not enough to induce significant ICD  
357 folding (**Figure 2D**). Note that we could not see any spectral peaks for the GST tag in this  
358 condition due to its large size (~54 kDa as a constitutive dimer) and consequent slow tumbling.  
359 Collecting the above evidence, we posit that the HPO-30 ICD needs to undergo both  
360 dimerization and induced folding in order to bind to the WRC. This induced folding has been  
361 proposed for many DNA-binding proteins and cell-signaling molecules, such as the interaction

362 between E-cadherin and  $\beta$ -catenin (Dyson and Wright, 2002; Huber et al., 2001; Huber and  
363 Weis, 2001; Turjanski et al., 2008). High-resolution structures of the ICD bound to WRC will be  
364 necessary to confirm this hypothesis.

365

### 366 **HPO-30 ICD inhibits actin polymerization, but promotes Rac1-WRC activation**

367 Previous studies have shown that Rac1 is the canonical activator of the WRC, and that  
368 various WIRS-containing receptors could further fine tune WRC activity, likely through  
369 secondary, weak interactions between the WRC and the receptor sequences flanking the WIRS  
370 motif (Chen et al., 2014a). After establishing that dimeric ICD robustly binds the WRC, we  
371 tested if the interaction could similarly influence WRC activity in promoting Arp2/3-mediated  
372 actin polymerization (Cooper et al., 1983; Doolittle et al., 2013a; Kouyama and Mihashi, 1981).  
373 While conducting the pyrene-actin polymerization assay, we noticed that buffer conditions had a  
374 significant impact on the ICD-WRC interaction. The commonly used pyrene-actin assay buffer  
375 for reactions involving WRC, 50KMEI20Gd (50 mM KCl, 2 mM MgCl<sub>2</sub>, 1 mM EGTA pH 8.0,  
376 10 mM Imidazole pH 7.0, 20% [w/v] glycerol, 1 mM DTT), reduced HPO-30 ICD binding to the  
377 WRC. Lowering the concentration of glycerol to 5% and replacing imidazole with HEPES at the  
378 same pH rescued binding (**Figure 4—figure supplement 1A**). Using this optimized buffer  
379 (50KMEH5Gd, containing 50 mM KCl, 2 mM MgCl<sub>2</sub>, 1 mM EGTA pH 8.0, 10 mM HEPES pH  
380 7.0, 5% [w/v] glycerol, 1 mM DTT), we tested the effect of monomeric and dimeric HPO-30  
381 ICD on actin polymerization using our chemically inducible dimerization (CID) constructs  
382 (shown in **Figure 3A**), which allowed us to compare the monomeric vs. dimeric ICD directly by  
383 switching between DMSO and rapamycin instead of using different solubility tags (**Figure 3—**  
384 **supplement figure 1D**). To our surprise, we observed a strong, dose-dependent inhibition of  
385 Rac1-WRC-mediated actin polymerization by HPO-30 ICD (**Figure 4A**, blue vs. orange curves),  
386 with the dimerized ICD showing much stronger inhibition (**Figure 4A**, solid vs. dashed curves).  
387 By contrast, the dimerized FKBP/FRB tag at the highest concentration only had a mild effect,  
388 indicating the inhibition was due to the HPO-30 ICD itself (**Figure 4A**, grey curve). Rapamycin  
389 alone had no effect on actin polymerization (**Figure 4—figure supplement 1B**).

390 Interestingly, we noticed the ICD reduced actin polymerization to a level lower than actin  
391 alone. This suggests the inhibitory effect was likely not because of the ICD binding to the WRC  
392 and thereby inhibiting WRC activity. Indeed, we found HPO-30 ICD similarly inhibited actin

393 polymerization induced by the isolated, constitutively active WCA peptide, with the dimerized  
 394 ICD again showing more potent inhibition (**Figure 4B**). This suggests the inhibitory effect of  
 395 ICD was not related to WRC, but likely directly related to actin (see below).

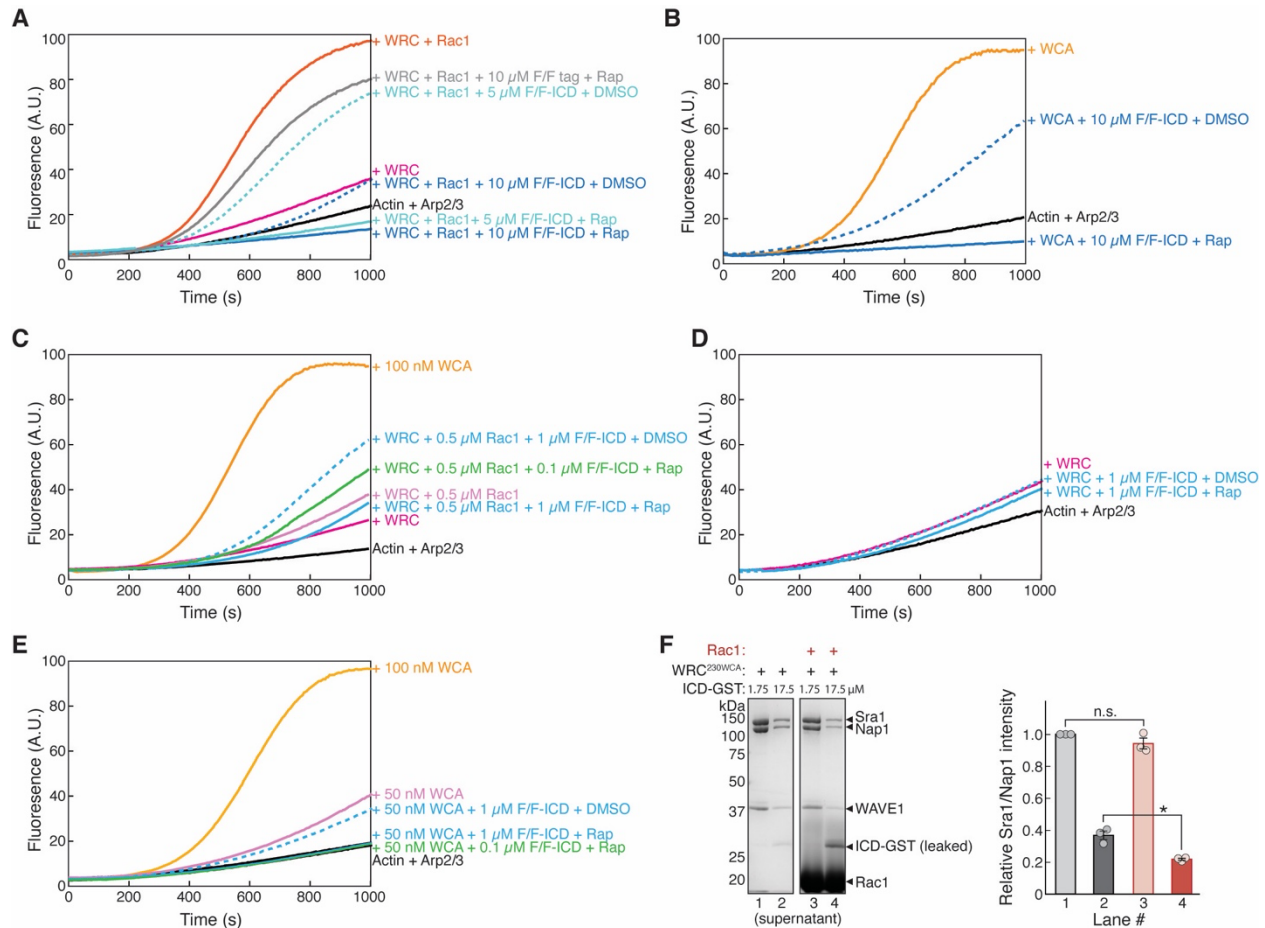

396  
 397 **Figure 4. HPO-30 ICD inhibits actin polymerization but promotes Rac1-WRC activation.** (A-E) Pyrene-actin  
 398 polymerization assays of indicated conditions. Reactions contain 2  $\mu$ M actin (10% pyrene-labeled), 10 nM Arp2/3  
 399 complex, 100 nM WRC<sup>230WCA</sup> or isolated WCA, Rac1<sup>QP</sup>, indicated concentrations of equimolar GB1-FKBP-ICD  
 400 and GB1-FRB-ICD, and 5  $\mu$ M rapamycin or equal volume of DMSO. (F) Coomassie blue-stained SDS PAGE gels  
 401 (left) and quantification from three independent repeats (right) showing equilibrium pull-down of WRC<sup>230WCA</sup> by  
 402 two concentrations of ICD-GST in the presence or absence of 40  $\mu$ M Rac1<sup>QP</sup>. Error bars represent standard error, \*  
 403  $p < 0.05$ , from Student's paired t-test.

404





425 concentration (0.1  $\mu\text{M}$ ) and included rapamycin to ensure dimer formation. At this low  
426 concentration, the dimerized ICD similarly promoted Rac1-WRC-mediated actin  
427 polymerization (**Figure 4C**, solid green curve). Although we were limited by the strong  
428 inhibitory activity of the ICD on actin polymerization and therefore could only measure a mild  
429 activating effect by using low ICD concentrations, this effect was specific to Rac1-activated  
430 WRC, as neither the WRC in the absence of Rac1 nor the isolated WCA could be further  
431 activated by ICD (**Figure 4 D,E**). This effect is similar to the WIRS-containing ICD from the  
432 cell adhesion membrane protein protocadherin 10 (PCDH10), in which PCDH10 ICD by itself  
433 had no effect on WRC activity, but cooperatively increased WRC activity when WRC was  
434 slightly activated by intermediate concentrations of Rac1 (Chen et al., 2014a). This cooperativity  
435 effect suggests the HPO-30 ICD should prefer to bind the WRC activated by Rac1. Consistent  
436 with this hypothesis, our equilibrium pull-down (EPD) assay showed GST-ICD could indeed  
437 pull down more WRC in the presence of saturating concentrations of Rac1 (**Figure 4F**, lane 2 vs.  
438 4—note that in EPD assays, the supernatant of the pull-down reactions was used to quantify the  
439 WRC that was not retained by immobilized GST-bait). Interestingly, within the HPO-30-DMA-1  
440 co-receptor complex, DMA-1 directly binds to TIAM-1, a Rac GEF, which could act  
441 synergistically with the direct effect of HPO-30 to promote WRC activation by increasing Rac1  
442 activity (Zou et al., 2018).

443

#### 444 **HPO-30 ICD binds to F-actin and inhibits actin depolymerization, similar to CapZ**

445 We first wondered if the WRC-independent inhibitory effect of HPO-30 ICD was due to  
446 the ICD binding to and sequestering free G-actin. However, we observed no detectable binding  
447 between GST-ICD or dimerized F/F-ICD and G-actin (**Figure 5—figure supplement 1**). We  
448 next wondered if the ICD inhibited actin polymerization by binding to F-actin. In our F-actin co-  
449 pelleting assay (Heier et al., 2017), we found that significantly more F/F-ICD indeed bound to F-  
450 actin, compared to BSA, F/F tag, and the capping protein CapZ (which binds to the barbed ends  
451 of F-actin) (**Figure 5A,B**). Interestingly, both the monomeric and dimeric F/F-ICD showed  
452 significant and similar binding to F-actin (**Figure 5A,B**, +DMSO vs. +Rap), although the  
453 dimeric ICD showed slightly stronger binding. This suggests that the monomeric ICD, while not  
454 as effective in inhibiting actin polymerization as the dimeric form, is also capable of binding to

455 actin filaments. Together, these data led us to a hypothesis that HPO-30 ICD may bind to actin  
 456 filaments to prevent actin polymerization.

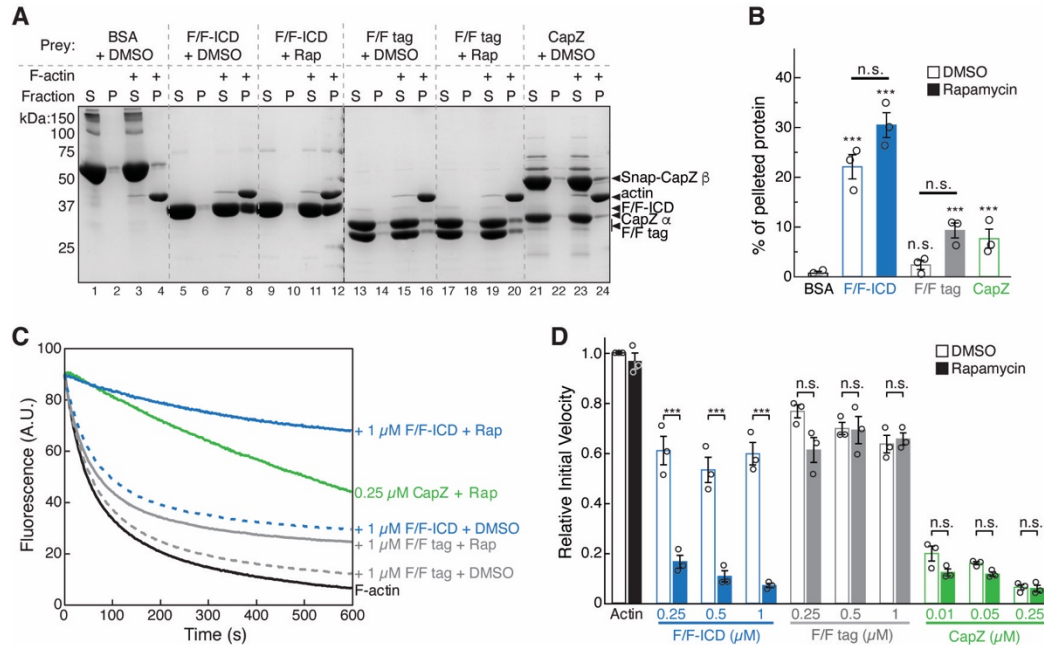

457  
 458 **Figure 5. HPO-30 ICD binds to F-actin and inhibits actin depolymerization.** (A) Representative Coomassie  
 459 blue-stained SDS PAGE gels showing F-actin co-pelleting assays of indicated F/F-ICD and CapZ in the presence or  
 460 absence of 5  $\mu$ M rapamycin (or equal volume of DMSO). S: supernatant, P: pellet. (B) Quantification of (A) from  
 461 three independent repeats, showing percentage of proteins in the pellet. Bars represent standard error, \*\*\*  $p < 0.001$ ,  
 462 ANOVA with Tukey test. (C) Representative F-actin depolymerization assay fluorescence curves of indicated  
 463 conditions. Each reaction contained 5  $\mu$ M pre-polymerized actin (70% pyrene labeled), diluted 20-fold into  
 464 depolymerization buffer containing indicated proteins in the presence or absence of 5  $\mu$ M rapamycin (or equal  
 465 volume of DMSO). (D) Quantification of the initial velocity of fluorescence curves shown in (C). Initial velocity  
 466 was normalized to F-actin alone in the presence of DMSO. Error bars represent standard error,  $n = 3$  independent  
 467 repeats, \*\*\*  $p < 0.001$ , ANOVA with Tukey test.

468

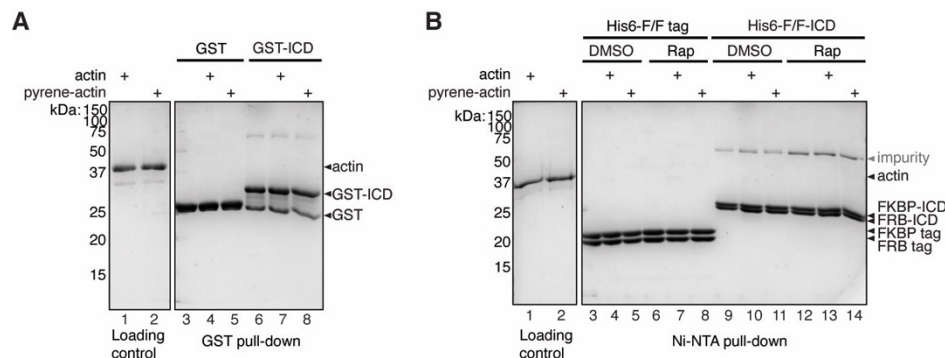

469

470 **Figure 5—figure supplement 1. HPO-30 ICD does not bind to G-actin. (A-B)** Coomassie blue-stained SDS  
471 PAGE gels showing GST-ICD (200 pmol) (A) or His6-F/F-ICD (B) (300 pmol) pulling down actin or pyrene  
472 labeled actin (500 pmol) in G buffer (2 mM Tris-HCl pH 8, 0.5 mM DTT, 0.2 mM ATP, 0.1 mM CaCl<sub>2</sub>, 1 mM  
473 NaN<sub>3</sub>), in the presence of 5 μM rapamycin (or equal volume of DMSO).

474

475 One group of proteins well-known to inhibit actin polymerization are called capping  
476 proteins (e.g., CapZ), which bind to the barbed ends of actin filaments to inhibit both actin  
477 polymerization and depolymerization from the barbed end (Caldwell et al., 1989; Weeds and  
478 Maciver, 1993). To test if the HPO-30 ICD may act as a capping protein, we used a  
479 depolymerization assay that has been commonly used to measure CapZ activity (Caldwell et al.,  
480 1989; Cooper and Pollard, 1985). We found that, similar to CapZ, HPO-30 ICD inhibited actin  
481 depolymerization (**Figure 5C,D**). Note that this activity was both concentration- and  
482 dimerization-dependent, similar to the ICD binding to WRC, suggesting dimerization is also  
483 involved in this capping-like activity. The ability to cap filaments also explains why dimeric  
484 HPO-30 ICD is capable of inhibiting actin polymerization more strongly than monomeric ICD.

485

#### 486 **HPO-30 ICD binds both the side and barbed end of actin filaments**

487 In the above bulk solution assays, the dimerization-independent binding to F-actin  
488 (**Figure 5A,B**) versus the dimerization-dependent inhibition of actin polymerization and  
489 depolymerization (**Figure 4A,B, 5C,D**) suggest HPO-30 ICD may have two distinct activities on  
490 actin filaments, with only the dimerization-dependent activity resembling that of CapZ. This is  
491 also supported by the observation that F-actin pelleted a more significant amount of HPO-30  
492 ICD than CapZ, as CapZ only binds to the barbed end of F-actin (albeit with high affinity)  
493 (**Figure 5A,B**) (Caldwell et al., 1989). Therefore, the ICD may bind to not only the barbed end  
494 (in a dimerization-dependent manner), but also other locations of the actin filament (in a  
495 dimerization-independent manner).

496 To directly validate these F-actin binding activities, we used single-molecule total  
497 internal reflection fluorescence (smTIRF) microscopy to visualize how HPO-30 ICD binds to  
498 actin filaments. For this assay, we prepared fluorophore-labeled proteins by fusing a SNAP tag to  
499 the N-terminus of the CapZ β-subunit, FKBP-ICD, FRB-ICD, FKBP tag, and FRB tag, which  
500 allowed us to label proteins using different SNAP-Surface® AlexaFluor® dyes (hereafter  
501 referred to as AF followed by the corresponding excitation wavelength) through the SNAP tag

502 and minimize the effect of fluorophore-labeling on protein activity. Actin was labeled with  
503 AF647 using previously established methods (Hansen et al., 2013). The SNAP-tagged F/F-ICDs  
504 were capable of binding the WRC in a rapamycin-dependent manner and to a level similar to the  
505 GB1-tagged F/F-ICD, suggesting that the SNAP-tag did not affect ICD binding to WRC (**Figure**  
506 **6—figure supplement 1A**, lane 1-4). The labeled CapZ and F/F-ICD proteins exhibited capping  
507 activity similar to their counterparts used in bulk solution assays (except AF647-labeled F/F-  
508 ICD, which we decided to exclude from smTIRF assays) (**Figure 6—figure supplement 1B,C**).

509 The smTIRF experiments clearly showed SNAP<sup>AF488</sup>-CapZ (at 5 nM) bound to the  
510 barbed end of filaments and stopped their growth (**Figure 6A** top; **6C** green; **Video 1,2**),  
511 consistent with the high affinity and very slow off-rate of CapZ at the barbed end shown in  
512 previous studies (Caldwell et al., 1989). Distinct from CapZ, SNAP<sup>AF546</sup>-F/F-ICD (15 nM, with  
513 8-fold molar excess of rapamycin) clearly revealed HPO-30 ICD mainly bound to the side of  
514 actin filaments, instead of the barbed end (**Figure 6A** bottom; **6B**; **Video 3-4**) (see below).  
515 **Figure 6A** bottom shows an example of binding of HPO-30 ICD near the barbed end of the  
516 filament (time 36.5 s), after which the filament continued to grow while the ICD molecule stayed  
517 bound to the same position. Note that this HPO-30 ICD molecule was bound to the filament, not  
518 the PEG-coated surface, because it moved together with the filament (**Video 3,4**). We applied  
519 stringent criteria to prevent misidentification of nonspecific background signals as binding  
520 events (see Materials and Methods) and found that 33% of filaments had at least one binding  
521 event over the course of the 15-minute duration of the experiment, which was significantly  
522 higher than the number of events for the F/F tag in identical conditions (**Figure 6B**).

523

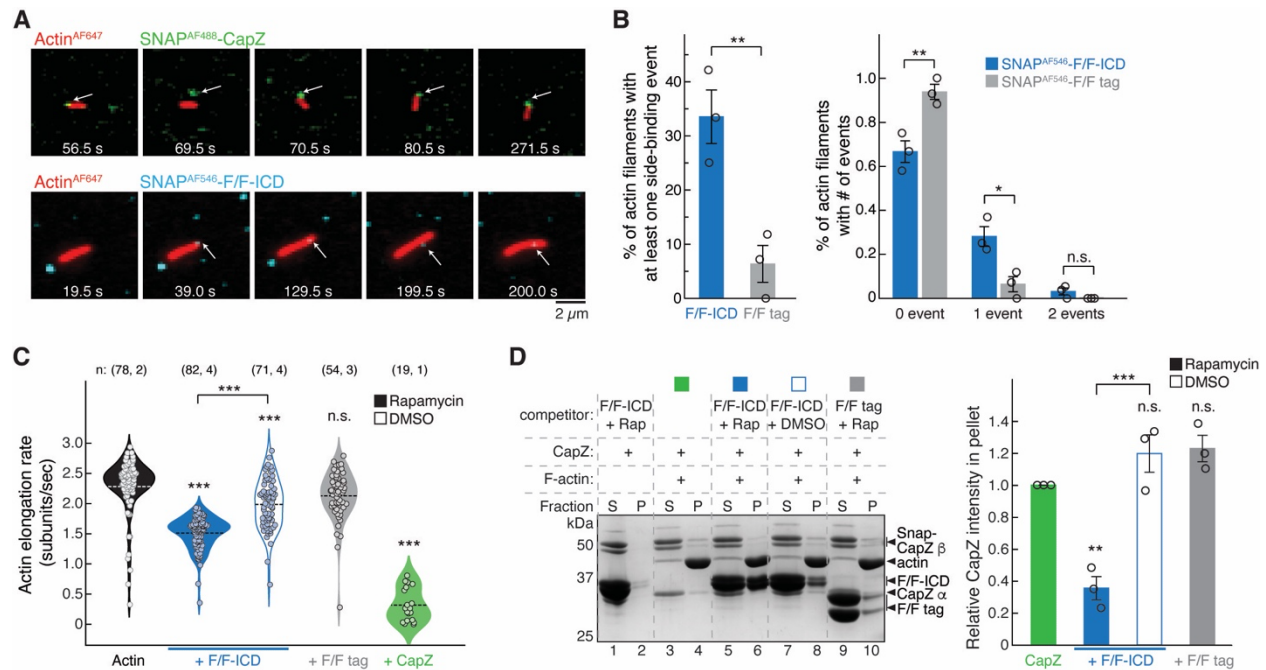

524

525 **Figure 6. HPO-30 ICD binds both the side and barbed end of actin filaments. (A)** Examples of time lapse

526 images from smTIRF experiments. Top: a capping event of SNAP<sup>AF488</sup>-CapZ (green, 5 nM) and actin<sup>AF647</sup>

527 (red). Bottom: a side-binding event of SNAP<sup>AF546</sup>-F/F-ICD (cyan, 15 nM) and actin<sup>AF647</sup> (red). Note that in

528 smTIRF time-lapses, sometimes a lag was observed between signals at the two channels. For example, in the

529 top row, the filament and SNAP<sup>AF488</sup>-CapZ puncta were displaced at 69.5 s, but aligned again at 70.5 s. The

530 lagging was due to image acquisition conditions, where, to prevent photobleaching of AF647, images in the

531 640 nm-channel for actin<sup>AF647</sup> were taken every 20 acquisitions of the 488 nm-channel for SNAP<sup>AF488</sup>-CapZ

532 (see Materials and Methods) **(B)** Quantification of the frequency of side binding events from smTIRF imaging.

533 Left: comparison of overall side binding events. Right: comparison of the percentage of filaments with 0, 1,

534 and 2 events. Data were from three independent repeats, at least 15 filaments randomly selected per video.

535 Bars represent standard error. \* p < 0.05, \*\* p < 0.01, Student's paired t-test. **(C)** Violin plot showing

536 quantification of elongation rate of actin filaments measured by smTIRF imaging. Total number of filaments

537 pooled from the number of independent repeats for each sample are indicated in the parentheses on top of each

538 column, respectively. \*\*\* p < 0.001, ANOVA with Tukey test. **(D)** Representative Coomassie blue-stained

539 SDS PAGE gel (left) and quantification of pelleted CapZ from three independent repeats (right) showing F-

540 actin (2 μM) co-pelleting assay of CapZ (0.6 μM) with the indicated F/F-ICD or F/F tag as a competitor (5

541 μM) in the presence or absence of 5 μM rapamycin (or equivalent volume DMSO). S: supernatant, P: pellet.

542 Bars represent standard error, \*\* p < 0.01, \*\*\* p < 0.001, ANOVA with Tukey test.

543



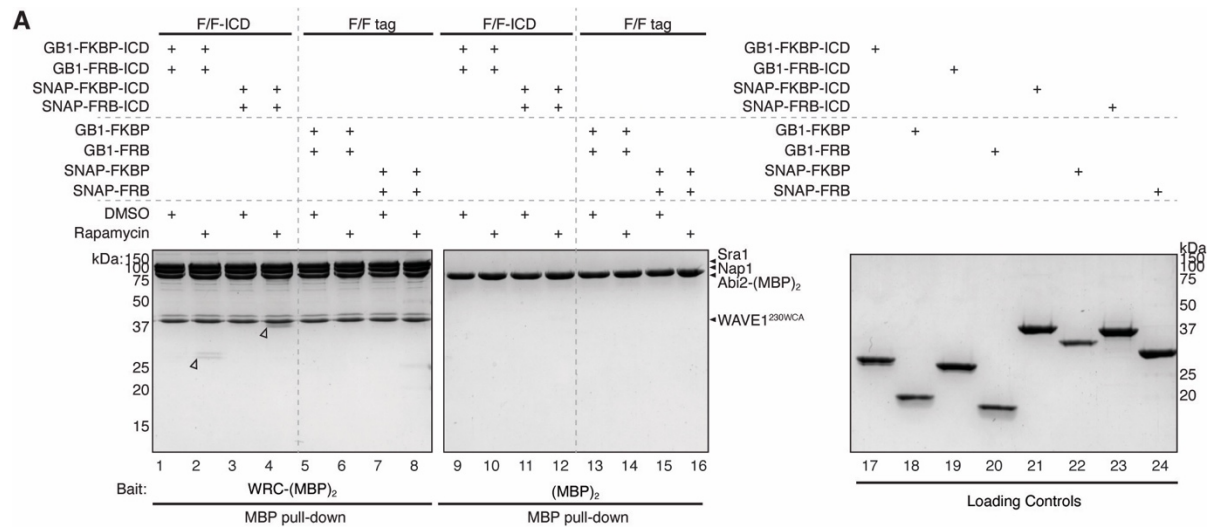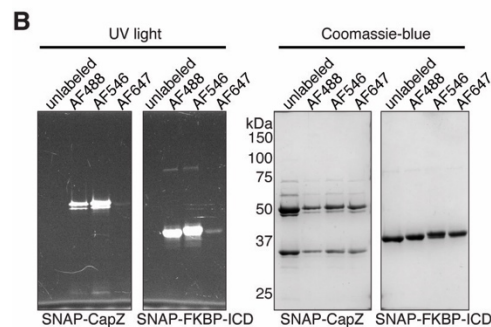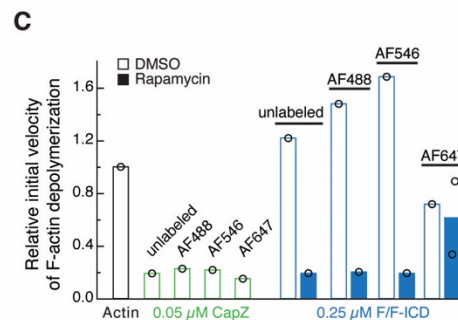

544  
 545 **Figure 6—figure supplement 1. SNAP tag and fluorophore-labeling did not affect HPO-30 ICD function.**  
 546 **(A)** Coomassie blue-stained SDS PAGE gel showing WRC-(MBP)<sub>2</sub> (60 pmol) pulling down GB1-tagged vs.  
 547 SNAP-tagged HPO-30 ICD (600 pmol) in the presence or absence of 5 μM rapamycin. **(B)** SDS PAGE gels of  
 548 SNAP-tag labeling of CapZ, FKBP-ICD, and FKBP tag with indicated SNAP-Surface© AlexaFluor© dyes.  
 549 Left: UV light with Alexa-488 filter. Right: Coomassie blue stain. **(C)** Actin depolymerization assays of  
 550 SNAP-Alexa labeled proteins in conditions identical to Figure 5C,D.

551  
 552 Since we could not further increase the concentration of fluorophore-labeled ICD in  
 553 smTIRF experiments to promote the chance of observing barbed end binding events without  
 554 causing high background, we switched to using unlabeled ICD at a higher concentration to  
 555 examine if the ICD inhibited actin filament growth as we observed in bulk solution assays in  
 556 **Figure 5C,D (Figure 6C; Video 5)**. We found that at 1 μM concentration, dimerized F/F-ICD  
 557 significantly reduced actin elongation rate from  $2.3 \pm 0.5$  subunits/sec for actin alone to  $1.5 \pm 0.3$   
 558 subunits/sec (Kuhn and Pollard, 2005) (**Figure 6C**, black vs. solid blue). The same concentration  
 559 of monomeric F/F-ICD also significantly slowed down actin elongation, but to a lesser extent  
 560 ( $2.0 \pm 0.4$  subunits/sec) (**Figure 6C**, open blue). This effect may result from the side-binding

561 activity of ICD slowing down actin polymerization or, more likely, a small population of dimeric  
562 ICD in equilibrium with the monomeric ICD, which could bind to the barbed end (see below).  
563 Importantly, dimerized F/F tag barely affected actin polymerization ( $2.1 \pm 0.4$  subunits/sec)  
564 (**Figure 6C**, grey). We were limited by sample addition to the microfluid chamber from high-  
565 concentration protein stocks and, as such, we could not further increase the unlabeled ICD  
566 concentration to higher than  $1 \mu\text{M}$  in order to observe an even stronger inhibitory effect. By  
567 comparison,  $5 \text{ nM}$  CapZ strongly inhibited actin polymerization ( $0.3 \pm 0.1$  subunits/sec).  
568 Together, these data suggest that HPO-30 ICD and CapZ similarly inhibit actin filament  
569 elongation, although the activity of HPO-30 ICD is less potent.

570 In the above smTIRF experiments, we were unable to capture stable binding of the ICD  
571 to the barbed end as we were for CapZ, likely because of multiple technical challenges: 1) the  
572 low concentration of ICD that we had to use in single molecule assays (nM vs.  $\mu\text{M}$  that we used  
573 in bulk solution assays), 2) possibly low affinity and fast off-rate of the ICD at the barbed end  
574 (reflected by the higher concentration than CapZ that was required for inhibiting actin  
575 depolymerization in bulk solution assays), 3) the complications of the side-binding activity  
576 (which, due to light diffraction limit, made it difficult to distinguish real barbed end binding  
577 events from side binding near the barbed end), 4) the amount of dimeric HPO-30 is likely to be  
578 very low, as the affinity of the FKBP-rapamycin complex for FRB (which is responsible for  
579 dimerization of HPO-30 in this system) is  $\sim 12 \text{ nM}$  (Banaszynski et al., 2005), and 5) the speed  
580 limitation of data acquisition (50 or 100 ms exposure time, which could miss fast  
581 binding/dissociation events). In order to determine if the ICD can indeed bind to the barbed end,  
582 we used a competition co-pelleting assay to examine if ICD binding can compete off CapZ  
583 binding to the barbed end of F-actin (**Figure 6D**). In this assay, due to the high affinity of CapZ  
584 to the barbed end, we used 10 times the concentration of F/F-ICD to compete against CapZ. We  
585 found that the dimerized F/F-ICD effectively reduced CapZ binding by over 60%, whereas the  
586 monomeric F/F-ICD or the dimerized F/F tag had no effect (**Figure 6D**). This result suggests  
587 dimeric, but not monomeric ICD binds to the barbed end, which can block CapZ binding,  
588 consistent with the result that dimeric ICD is more effective in inhibiting actin polymerization  
589 (**Figure 4A,B**) and depolymerization (**Figure 5C,D**). Alternatively, dimeric HPO-30 ICD could  
590 bind near, instead of directly to, the barbed end, which could allosterically destabilize CapZ

591 binding by altering the conformation of the actin filament. High-resolution structural information  
592 will be necessary to distinguish between these two scenarios.

593 Combining the above results, we conclude that HPO-30 ICD monomers preferentially  
594 bind to the side of actin filaments, while the dimers can bind to both the sides and the barbed end  
595 (or near the barbed end) of filaments. Only the (near-) barbed end binding by dimers can inhibit  
596 actin filament growth in a manner similar to the capping protein CapZ.

597

## 598 **Discussion**

599 HPO-30 is a claudin-like membrane protein required for higher order dendrite branching  
600 in *C. elegans* PVD neurons. Previous studies showed this function required the HPO-30 ICD to  
601 bind to the WRC, which in turn could activate Arp2/3 to generate branched actin networks to  
602 deform the membrane and promote new dendrite formation (Zou et al., 2018). Here, our  
603 biochemical, biophysical, structural, and single molecule analysis uncovers two distinct, novel  
604 mechanisms used by the HPO-30 ICD to regulate local actin dynamics. In the first mechanism,  
605 the unstructured ICD undergoes dimerization and induced folding to bind the WRC, which, in  
606 addition to recruiting the WRC to local dendrite branching sites, can also cooperate with Rac1 to  
607 promote WRC activation (**Figure 7**, step 3). In parallel, the co-receptor of HPO-30, DMA-1, was  
608 shown to bind the Rac-GEF, TIAM1, which would provide an additional layer of control to  
609 promote Rac1 activation and drive WRC-Arp2/3-mediated actin polymerization (Zou et al.,  
610 2018). In the second mechanism, the ICD can directly bind to actin filaments to modulate actin  
611 dynamics. Both monomeric and dimeric forms of the ICD can bind to the side of actin filaments,  
612 but only the dimeric ICD can bind to the barbed end to inhibit both actin polymerization and  
613 depolymerization, similar to the activity of the capping protein CapZ (**Figure 7**, step 1). These  
614 two seemingly contradictory actin regulatory mechanisms offered by the same membrane  
615 receptor could provide exquisite tuning of local actin dynamics to prepare for dendrite branching  
616 (**Figure 7**, and see discussion below).

617



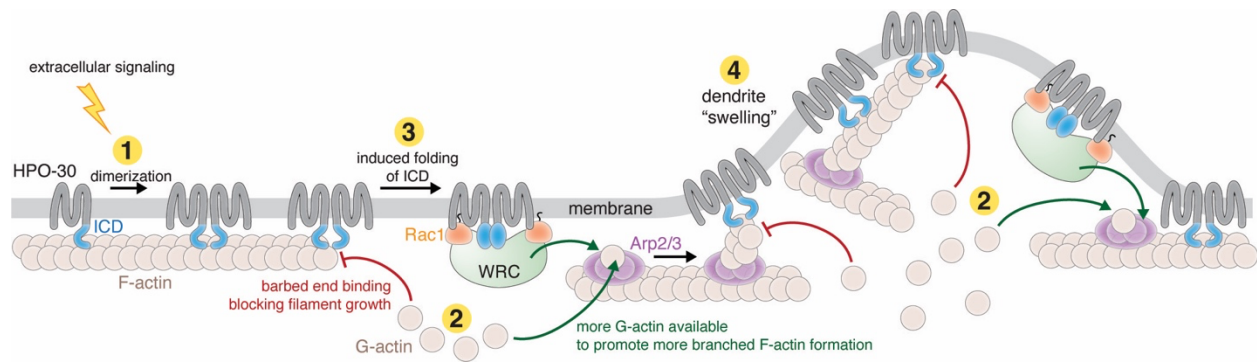

618

619 **Figure 7. Model showing HPO-30 ICD integrates two distinct mechanisms to regulate actin dynamics and**  
620 **promote dendrite branching.** In (1), HPO-30 on the dendrite membrane undergoes dimerization (or  
621 oligomerization). Both monomeric and dimeric forms of HPO-30 ICD can bind to the side of actin filaments, but  
622 only the dimeric ICD can bind to the fast-growing barbed end. In (2), dimeric ICD binding to the barbed end acts as  
623 a capping protein, which stops long filament growth and helps reserve G-actin for the Arp2/3 complex to nucleate  
624 actin for producing more short, branched actin filaments. In (3), the dimeric ICD undergoes induced folding to bind  
625 the WRC. This interaction recruits the WRC to the membrane and simultaneously promotes WRC activation by  
626 Rac1, which in turn stimulates Arp2/3 to produce branched actin filaments. In (4), the dual actions of HPO-30 ICD  
627 cooperatively promote the formation of branched actin networks, which can cause the “swelling” of dendrite  
628 observed in previous studies (Shi et al., 2021), an important prerequisite for the outgrowth of a new dendrite branch.  
629

630 Many neuronal receptors, including SYG-1, Robo, Neogenin, TMEM132, neuroligins,  
631 and various protocadherins, contain a short WIRS peptide motif in their ICD, which allows them  
632 to recruit the WRC to their sites of action at membranes to regulate local actin polymerization in  
633 diverse cellular processes (Chaudhari et al., 2021; Chia et al., 2014; Fan et al., 2018; Lee et al.,  
634 2016; Wang et al., 2021; Xing et al., 2018). The HPO-30 ICD does not contain a WIRS motif.  
635 Instead, our structural-function analysis, structural predictions, and biophysical measurements  
636 reveal that HPO-30 ICD is unstructured, requires dimerization, and likely undergoes induced  
637 folding in order to bind to the WRC. This binding mechanism should be conserved throughout  
638 animals, as the HPO-30 ICD is conserved only in nematodes, but can bind to both *C. elegans* and  
639 human WRCs (Zou et al., 2018). Therefore, HPO-30 represents a new class of transmembrane  
640 proteins, which interact with the WRC using a noncanonical mechanism distinct from the  
641 previously identified WIRS peptide-containing receptors (Chen et al., 2014a). Exactly how HPO-  
642 30 ICD dimerizes and folds into a structure to bind the WRC is currently unknown, but the  
643 knowledge from our study has laid the ground for high-resolution structural determination of the  
644 HPO-30 ICD bound to the WRC, which will not only reveal the interaction mechanism and

645 identify the interaction surface on the WRC, but also facilitate the identification of human  
646 homologs of HPO-30 and revelation of new biological functions of this interaction in neural  
647 development (and/or other processes).

648 Our study suggests that HPO-30 binding to the WRC not only provides a membrane  
649 localization mechanism to recruit the WRC to the dendrite branching site, but also can  
650 simultaneously promote WRC activation by Rac1. The dual, synergistic actions of both binding  
651 and activating the WRC have been observed in several WIRS-containing receptors, such as  
652 PCDH10, in which WIRS peptide binding is responsible for membrane recruitment, while weak,  
653 secondary interactions from the flanking sequences in receptor ICD promotes WRC activation  
654 (Chen et al., 2014a). The HPO-30 ICD, however, is distinct from WIRS-containing receptors in  
655 that the ICD binding can directly promote WRC activation. Due to the strong inhibitory effect of  
656 HPO-30 ICD in pyrene-actin polymerization assays, it will be important to develop new assays  
657 to directly measure WRC activation (e.g. by tracking WCA release) to understand how HPO-30  
658 ICD binding enhances WRC activation by Rac1. Rac1 activates the WRC by binding to two  
659 distinct sites located on the Sra1 subunit (Chen et al., 2017; Ding et al., 2022). It is possible  
660 HPO-30 ICD promotes WRC activation by Rac1 by directly stabilizing Rac1 binding to either  
661 site or by destabilizing the sequestration of WCA.

662 HPO-30 to our knowledge represents the first transmembrane protein that possesses actin  
663 capping, or capping-like, activity. The abilities of HPO-30 to promote WRC membrane  
664 recruitment and activation (which stimulates Arp2/3-mediated actin polymerization) and to  
665 simultaneously cap actin filaments and inhibit actin polymerization seem to be conflicting  
666 functions. However, such capping activity, which is usually provided by cytosolic capping  
667 proteins like CapZ, are known to be essential for Arp2/3-based actin dynamics in both bead  
668 motility assays *in vitro* and many processes *in vivo* (Akin and Mullins, 2008; Miyoshi et al.,  
669 2006). It is believed that capping proteins can reserve G-actin by blocking it from accessing  
670 barbed ends and simultaneously prevent the barbed end from sequestering the WH2 region of  
671 WCA, which collectively stimulates the formation of new branches through Arp2/3. Thus,  
672 capping proteins are critical for dynamically modulating the actin architecture to generate force  
673 against the surface where actin is localized (Akin and Mullins, 2008; Funk et al., 2021) (**Figure**  
674 **7**, step 2). The capping activity of HPO-30 ICD in principle should similarly stimulate the  
675 formation of a highly branched actin network. Although HPO-30 ICD apparently has lower

676 capping activity compared to the canonical capping protein CapZ, it has the advantage of  
677 concentrating the capping activity next to membranes to provide a more focused control of actin  
678 dynamics.

679         The requirement of dimerization of HPO-30 ICD for both binding the WRC and  
680 providing the capping activity suggests an intriguing regulatory mechanism of membrane  
681 proteins. Clustering of membrane receptors is a common mechanism to increase local  
682 concentration of membrane signaling (Johannes et al., 2018). Enrichment of HPO-30 at  
683 developing PVD neuron dendrites is correlated with the high level of F-actin in these branches  
684 (Zou et al., 2018). In addition to increasing HPO-30 density, clustering of HPO-30 would  
685 facilitate dimerization of its ICD, which can act as a functional switch to allow the ICD to adopt  
686 two functions: binding to the WRC and capping actin filaments. This dimerization-mediated  
687 functional switch can help the cell to distinguish signal from noise and achieve switch-like  
688 spatiotemporal control of actin polymerization in response to upstream stimuli. Given the distinct  
689 surfaces of the actin barbed end and the WRC, it is possible the dimerized HPO-30 ICD uses  
690 distinct structural mechanisms to bind the two targets. Such structural plasticity has been  
691 observed for signaling molecules with versatile functions (Bürigi et al., 2016; Dishman and  
692 Volkman, 2018). Resolving the high-resolution structures and identifying the key residues  
693 responsible for each binding event would allow us to differentiate the two functions of HPO-30,  
694 both in *in vitro* and *in vivo*.

695         Together, our data establish HPO-30 as the first membrane receptor that, upon  
696 dimerization, can directly integrate the activities of Arp2/3-mediated actin polymerization  
697 (resembling WIRS-containing receptors, albeit through a distinct mechanism) and actin filament  
698 capping (resembling canonical barbed end cappers like CapZ, although the exact mechanism  
699 could be different). These two distinct functions by the same membrane receptor provide an  
700 exciting model to explain how HPO-30 regulates local actin dynamics to facilitate dendrite  
701 branching (**Figure 7**). Synergistic action of both functions of HPO-30 would promote the  
702 formation of highly branched actin networks, giving rise to dendritic “swellings” observed in  
703 PVD neurons prior to dendrite branch outgrowth (**Figure 7**, step 4) (Shi et al., 2021).

704  
705  
706

## 707 **Materials and Methods**

### 708 *Protein expression and purification*

709 HPO-30 ICD proteins (and their associated alanine-scan mutants), including GST-ICD,  
710 ICD-GST, DLC8-ICD-His6, GB1-ICD-His6, His9-sumo-ICD, MBP-ICD, GST-ICD-mEGFP,  
711 GB1-FKBP-ICD-His6, GB1-FRB-ICD-His6, GB1-FKBP-His6, GB1-FRB-His6, SNAP-FKBP-  
712 ICD-His6, SNAP-FRB-ICD-His6, SNAP-FKBP-His6, and SNAP-FRB-His6, as well as other  
713 related proteins, including MBP-WAVE1 (1-230), MBP-WAVE1 (1-230)-WCA, MBP-WAVE1  
714 (1-178), MBP-Abi2 (1-158), MBP-HSPC300, (MBP)<sub>2</sub>-Abi2 (1-158), (MBP)<sub>2</sub>-HSPC300, and  
715 Rac1<sup>Q61L/P29S</sup> Δ4 (herein referred to as Rac1<sup>QP</sup>), were individually expressed in Arctic Express  
716 (DE3) RIL (Agilent) or BL21 (DE3) T1<sup>R</sup> (Sigma) cells after induction with 0.75 mM IPTG at 10  
717 °C or 18 °C for 16 hours. His10-SNAP-CapZ β and CapZ α were expressed together from the  
718 pCDF Duet vector in Arctic Express (DE3) RIL (Agilent) cells after induction with 0.75 mM  
719 IPTG at 10 °C for 16 hours. GST-ICD or ICD-GST (and alanine-scan mutants) and GST-  
720 mEGFP were purified through Glutathione Sepharose beads (GE Healthcare), followed by cation  
721 exchange chromatography using a Source 15S column (GE Healthcare) at pH 7.0. MBP-ICD  
722 was purified through amylose resin (New England Biolabs), followed by cation exchange  
723 chromatography using a Source 15S column (GE Healthcare) at pH 7.0. The GST tag from GST-  
724 ICD-mEGFP and the MBP tag from MBP-ICD were removed using TEV cleavage at 4 °C  
725 overnight, followed by cation exchange chromatography using a Source 15S column (GE  
726 Healthcare) at pH 7.0. DLC8-ICD-His6, GB1-ICD-His6, His9-sumo-ICD, GB1-FKBP-ICD-His6  
727 (and associated alanine mutant), GB1-FRB-ICD-His6 (and associated alanine mutants), GB1-  
728 FKBP-His6, GB1-FRB-His6, SNAP-FKBP-ICD-His6, SNAP-FRB-ICD-His6, SNAP-FKBP-  
729 His6, and SNAP-FRB-His6 were purified through Ni-NTA Agarose resin (Qiagen), followed by  
730 cation exchange chromatography using a Source 15S column (GE Healthcare) at pH 7.0. GST-  
731 ICD, ICD-GST, DLC8-ICD-His6, GB1-ICD-His6, His6-sumo-ICD, ICD-mEGFP, untagged  
732 ICD, GB1-FKBP-ICD-His6 (and associated alanine mutants), GB1-FRB-ICD-His6 (and  
733 associated alanine mutants), GB1-FKBP-His6, GB1-FRB-His6, SNAP-FKBP-ICD-His6, SNAP-  
734 FRB-ICD-His6, SNAP-FKBP-His6, SNAP-FRB-His6 were further purified through a Superdex  
735 75 column (GE Healthcare). His10-SNAP-CapZ β and CapZ α were purified through Ni-NTA  
736 Agarose resin (Qiagen), followed by anion exchange chromatography using a Source 15Q  
737 column (GE Healthcare) at pH 8.0 and size exclusion chromatography on a Superdex 200

738 column (GE Healthcare). Rac1<sup>QP</sup>Δ4 was purified by an SP-Sepharose Fast Flow column (GE  
739 Healthcare) at pH 7.0 followed by size exclusion chromatography through a Superdex 75  
740 column.

741 MBP-WAVE1, MBP-Abi2, MBP-HSPC300, (MBP)<sub>2</sub>-Abi2, and (MBP)<sub>2</sub>-HSPC300  
742 proteins were purified through amylose beads (New England Biolabs). His6-Sra1 and Nap1  
743 dimer were co-expressed in Tni insect cells (Expression systems), and the dimer was purified  
744 through Ni-NTA agarose resin (Qiagen) followed by anion exchange chromatography using a  
745 Source 15Q column at pH 8.0. Pentameric WRC was assembled and purified following  
746 previously described protocols (Chen et al., 2014b, 2010). Briefly, individually purified  
747 WAVE1, Abi2, and HSPC300 subunits were mixed at equimolar ratio in the presence of 1%  
748 (w/v) NP40 and incubated on ice for 48 hours. The assembled trimer was then purified by anion  
749 exchange chromatography through a Source 15Q column at pH 8.0 and cation exchange  
750 chromatography by a Source 15S column at pH 6.0. Dimer and trimer were mixed at equimolar  
751 ratio and incubated on ice for 30 min. The assembled pentamer was purified on amylose beads  
752 (NEB), after which the MBP and His6 tags were cleaved using TEV protease incubation  
753 overnight. The pentamer was further purified using anion exchange chromatography through a  
754 Source 15Q column at pH 8.0 and size exclusion chromatography using a Superdex 200 column.

755 Actin was purified as previously described from rabbit muscle acetone powder from Pel-  
756 Freeze (Spudich and Watt, 1971). Actin was labeled by pyrene or Alexa Fluor<sup>®</sup> 647 after  
757 polymerization at 4 °C, using a 10-fold or 2-fold excess dye, respectively. Actin and pyrene actin  
758 for actin polymerization and depolymerization assays were kept in continuous dialysis at 4 °C,  
759 with biweekly buffer changes. Actin and Alexa Fluor<sup>®</sup> 647-labeled actin for smTIRF  
760 experiments were kept in closed tubes for two weeks.

761

### 762 ***Generation of WRC-(MBP)<sub>2</sub>***

763 To create WRC-(MBP)<sub>2</sub>, MBP-Abi2 (1-158) had the sortase ligation sequence, LPGTG,  
764 genetically fused to the C-terminus. Meanwhile, a TEV site was added to the N-terminus of an  
765 (MBP)<sub>2</sub> tag, which exposes a Gly after Tev cleavage. MBP-Abi2 (1-158)-LPGTG was  
766 expressed, purified, and incorporated into the WRC as described above to create WRC-LPGTG.  
767 GG-2MBP was expressed in Arctic Express (DE3) RIL (Agilent) cells after induction with 0.75  
768 mM IPTG at 10 °C for 16 hours, purified on amylose resin, and subjected to TEV cleavage



769 overnight, followed by anion exchange chromatography using a Source 15Q column (GE  
770 Healthcare). Sortase5M (sortase A pentamutant) was a gift from David Liu (Addgene plasmid #  
771 75144), expressed in Arctic Express (DE3) RIL (Agilent) cells, purified over Ni-NTA agarose  
772 resin, followed by cation exchange using a Source 15S column (GE Healthcare) and size  
773 exclusion chromatography using a Superdex 75 column (GE Healthcare) (Chen et al., 2011). 1  
774  $\mu\text{M}$  WRC-LPGTG was mixed with 25  $\mu\text{M}$  GG-MBP and 10  $\mu\text{M}$  sortase in 50 mM Tris pH 7.5,  
775 150 mM NaCl, and 10 mM  $\text{CaCl}_2$  and left at room temperature for two hours. The reaction was  
776 quenched by adding 25 mM EGTA, and the WRC-(MBP)<sub>2</sub> was purified over a Superdex 200  
777 column to separate the WRC-(MBP)<sub>2</sub> from unligated products.

778

### 779 ***Regular pull-down assay***

780 GST pull-down assays were performed as previously described (Shi et al., 2021). Briefly,  
781 20  $\mu\text{L}$  of GSH-Sepharose beads were mixed with bait protein and prey protein in 1 mL of pull-  
782 down buffer (50 mM NaCl, 10 mM HEPES pH 7.0, 5% (w/v) glycerol, 5 mM 2-  
783 mercaptoethanol, and 0.05% Triton X-100). The samples were mixed at 4 °C for 30 minutes,  
784 washed three times with 1 mL of pull-down buffer, and eluted with 40  $\mu\text{L}$  of elution buffer  
785 containing 30 mM reduced glutathione and 100 mM Tris pH 8.5. MBP pull-down assays were  
786 performed like GST pull-down assays, but used 20  $\mu\text{L}$  of amylose resin and elution buffer that  
787 was pull-down buffer supplemented with 2% [w/v] maltose. His-tagged pull-down assays were  
788 performed as above, used 20  $\mu\text{L}$  of Ni-NTA agarose resin, G-Buffer (2 mM Tris HCl pH 8.0,  
789 200  $\mu\text{M}$  ATP, 0.5 mM DTT, 0.1 mM  $\text{CaCl}_2$ , and 1mM  $\text{NaN}_3$ ) as the wash buffer, and elution  
790 buffer containing 500 mM imidazole pH 7.0. In all pull-down assays, the eluant was examined  
791 by SDS-PAGE and Coomassie blue staining. In all pull-down assays using FKBP and FRB,  
792 rapamycin was added to 5  $\mu\text{M}$  final concentration. As controls, the same volume of DMSO was  
793 added in place of rapamycin. For the alanine scan pull-down quantification, the intensity of the  
794 Sra1 and Nap1 bands were quantified using ImageJ. The intensity from the GST control lane was  
795 subtracted from the alanine protein lane, and the corrected intensity was divided by the intensity  
796 of the wild type HPO-30 lane. A Student's paired t-test was used to compare the wild type and  
797 each mutant separately.

798

### 799 ***Equilibrium pull-down (EPD) assay***

800 Equilibrium pull-down assays were performed as previously described (Chen et al.,  
801 2017). Briefly, 60  $\mu$ L of GSH-Sepharose beads (50% slurry equilibrated in pull-down buffer)  
802 were mixed with 0.1  $\mu$ M WRC and various amounts of GST-tagged protein (from 0.01  $\mu$ M to 30  
803  $\mu$ M) and brought to 100  $\mu$ L with pull-down buffer (composition the same as in GST pull-down  
804 assays, above). The reactions were allowed to mix for 30 min at 4 °C, and four reactions at a  
805 time were spun at 15 krpm for 15 seconds. The supernatant was removed and examined by SDS-  
806 PAGE and Coomassie blue staining. Each assay was repeated 3 times. The Sra1/Nap1 intensity  
807 was quantified using ImageJ to calculate the fractional occupancy. The data was fitted in  
808 DynaFit using a single binding site model (Kuzmic, 1996).

809

### 810 *Size exclusion chromatography analysis*

811 GB1-FKBP-ICD and GB1-FRB-ICD were mixed at equimolar ratio and loaded onto a  
812 24-mL Superdex 200 column (GE healthcare) equilibrated in 100 mM NaCl, 10 mM HEPES pH  
813 7.0, 5% (w/v) glycerol, and 1 mM DTT, with or without 5  $\mu$ M rapamycin.

814

### 815 *Pyrene-actin polymerization assay*

816 Pyrene-actin polymerization assays were performed as previously described (Doolittle et  
817 al., 2013a). Actin was purified and pyrene-labeled as described above and kept in continuous  
818 dialysis in G-Buffer (2 mM Tris-HCl pH 8, 0.5 mM DTT, 0.2 mM ATP, 0.1 mM CaCl<sub>2</sub>, 1 mM  
819 NaN<sub>3</sub>) that is changed twice a week. Arp2/3 was purified following existing protocols and kept  
820 aliquoted at -80°C (Doolittle et al., 2013b). All proteins except for the WRC and Arp2/3 were  
821 purified into 50KMEH5Gd (50 mM KCl, 1 mM MgCl<sub>2</sub>, 1 mM EGTA, 10 mM HEPES pH 7.0,  
822 5% [w/v] glycerol, 1 mM DTT) and stored at -80°C. WRC230VCA was purified into  
823 100KMEI20Gd (100 mM KCl, 10 mM Imidazole pH 7.0, 20% [w/v] glycerol) and kept at -80°C.  
824 Unless otherwise noted, a typical reaction contained 2  $\mu$ M actin with 10% pyrene labeled, 10 nM  
825 Arp2/3, 100 nM WRC<sup>230WCA</sup> or free WCA, and /or 0.4  $\mu$ M Rac1<sup>QPΔ4</sup>, and/or additional ICD  
826 ligands to be analyzed, with or without 5  $\mu$ M rapamycin or an equivalent volume of DMSO. The  
827 excitation and emission wavelengths were set to 365 nm and 407 nm, respectively. Data were  
828 collected on a TECAN SPARK plate reader.

829

### 830 *Actin depolymerization assay*

831 Actin depolymerization assays were performed as previously described, with some  
832 modifications (Heiss and Cooper, 1991). Actin at ~20  $\mu$ M and 70% pyrene-labeling was pre-  
833 polymerized at room temperature overnight by addition of 1 mM  $MgCl_2$  and 50 mM KCl. For  
834 each depolymerization reaction, actin was diluted to 5  $\mu$ M in one pooled mixture, either alone or  
835 with proteins to be tested, and left for 3 minutes at room temperature to allow for protein  
836 binding. Protein at the same concentration was prepared in a second, separate mixture. After 3  
837 minutes, the actin was further diluted 20-fold by the addition of the second mixture. All proteins  
838 were diluted into depolymerization buffer, which is 3 parts G-Buffer and 1 part 50KMEH5Gd  
839 (see above for buffer composition). The excitation and emission wavelengths were set to 365 nm  
840 and 407 nm, respectively. Data were collected on a TECAN SPARK plate reader. To calculate  
841 the relative initial velocity, the slope for the first 30 seconds of the reaction was calculated and  
842 divided by the slope of the actin control. ANOVA on Ranks and Dunn-Tukey tests were  
843 performed to determine significance.

844

#### 845 ***Circular dichroism (CD) measurement***

846 Untagged HPO-30 ICD was purified into 100 mM NaCl, 10 mM HEPES pH 7.0, 5%  
847 (w/v) glycerol, and 1 mM DTT. The same buffer was used to dissolve BSA powder (Fisher Cat #  
848 BP1600-100) and as a blank for the CD spectrometer. The blank buffer was degassed by  
849 sonication for 3 minutes at 30% power. Data were collected on a MOS-500 fluorimeter using an  
850 ALX250 lamp. Data were collected for wavelengths between 190 nm and 260 nm, with a 1 nm  
851 step, 0.5 s acquisition period, and averaged over three repeats. Mean residue ellipticity was  
852 calculated as described previously (Greenfield, 2006). Data for BSA and HPO-30 were collected  
853 at the same concentration of protein. TMAO was dissolved to 3 M in the same buffer as HPO-30  
854 purification and was added to the appropriate concentration before measurement. Separate buffer  
855 blanks containing the same concentration of TMAO were measured to ensure TMAO alone did  
856 not contribute to the spectrum.

857

#### 858 ***Nuclear magnetic resonance (NMR) spectroscopy***

859 Isotopically labeled proteins were expressed and purified as described for non-labeled  
860 proteins, using minimal media containing  $N^{15}$   $NH_4Cl$  instead of traditional media. Proteins were  
861 purified into 100 mM NaCl, 10 mM HEPES pH 7.0, 5% (w/v) glycerol, 1 mM DTT and were



862 supplemented with 10% D<sub>2</sub>O. Protein concentration ranged from 70 μM (GB1 tag) to 850 μM  
863 (GB1-ICD). GB1 tag was produced by thrombin cleavage of GB1-ICD and removal of ICD  
864 using nickel-NTA resin (Qiagen). NMR spectra were collected on a Bruker 700 MHz  
865 spectrometer at Iowa State University equipped with z-shielded gradient triple resonance 5 mm  
866 TCI cryoprobe. 2D <sup>1</sup>H-<sup>15</sup>N TROSY-HSQC and <sup>1</sup>H-<sup>15</sup>N HSQC experiments were recorded with a  
867 time domain matrix consisting of 100\* (t<sub>1</sub>, <sup>15</sup>N) × 1024\* (t<sub>2</sub>, <sup>1</sup>H) complex points with acquisition  
868 time of 50 ms (t<sub>1</sub>) and 91.8 ms (t<sub>2</sub>) using 16 scans per FID and 1.5 s interscan delay. Spectral  
869 widths for <sup>1</sup>H and <sup>15</sup>N dimensions were set to 15.9 and 28.2 ppm, respectively, with carriers set  
870 at 4.821 ppm (<sup>1</sup>H) and 119.138 ppm (<sup>15</sup>N).

871

### 872 *Fluorophore labeling of proteins*

873 SNAP-tagged proteins were labeled with SNAP-Surface<sup>®</sup> Alexa Fluor<sup>®</sup> 488, SNAP-  
874 Surface<sup>®</sup> Alexa Fluor<sup>®</sup> 546, and SNAP-Surface<sup>®</sup> Alexa Fluor<sup>®</sup> 647 (New England Biolabs). 5  
875 μM protein and 10 μM dye were mixed and allowed to react in 50KMEH5Gd at room  
876 temperature for two hours, followed by desalting into 50KMEH5Gd buffer and concentration.  
877 Dye extinction coefficients were calculated from a standard curve and are as follows: Alexa 488  
878 at 495 nm, 95000 M<sup>-1</sup>\*cm<sup>-1</sup>; Alexa 546 at 556 nm, 120000 M<sup>-1</sup>\*cm<sup>-1</sup>; Alexa 647 at 650 nm,  
879 255000 M<sup>-1</sup>\*cm<sup>-1</sup>. Protein labeling efficiency was calculated by dividing protein concentration  
880 by dye concentration—for Alexa Fluor<sup>®</sup> 488 the labeling efficiency was estimated at ~100%, for  
881 Alexa Fluor<sup>®</sup> 546 the labeling efficiency was estimated at ~60%.

882

### 883 *smTIRF data collection*

884 All time lapses were collected on a Nikon TE2000-E inverted microscope equipped with  
885 a 100x 1.49 NA TIRF objective and a TIRF Quad filter cube (Chroma C141789), using an Andor  
886 iXon3 EM-CCD (DU-897-CS0) camera, with a GATACA iLas system to prevent uneven  
887 illumination. Coverslips were prepared as described previously with slight modifications  
888 (Narvaez-Ortiz and Nolen, 2022). Briefly, glass coverslips (VWR Cat # 48393-241) were  
889 cleaned with 2% (w/v) Hellmanex, acetone, and 1 M KOH solutions with sonication, and rinsed  
890 extensively with DI water before each step and after the KOH treatment. Coverslips were rinsed  
891 with methanol and dried using a N<sub>2</sub> gas stream. GOPTES (Fisher Cat # G0210100G) was added  
892 to the coverslips, which were then baked at 75°C for 30 minutes. Coverslips were rinsed with

893 microscope grade acetone and dried with N<sub>2</sub> gas stream. A 2% (w/w) Biotin-PEG3000/NH<sub>2</sub>-  
894 PEG3000 mixture of powder (Rapp Polymere GmbH) was prepared, placed on top of the  
895 coverslips, and the coverslips baked overnight at 75°C. After overnight baking, the coverslips  
896 were washed with water and dried with N<sub>2</sub> gas. Individual wells were made by placing  
897 functionalized coverslips on Ibidi® sticky-Slide IV 0.4 slides (Ibidi Cat # 80608). Individual  
898 lanes were prepared for microscopy by incubating with 5% (w/v) Pluronic F-127 for 10 min at  
899 RT, followed by either 100 nM (for elongation rate analysis) or 35 nM (for side binding analysis)  
900 neutravidin incubation (in 50 mM Tris pH 7.5, 200 mM NaCl, referred to as LS TBS for short)  
901 for 10 min at RT, and either 10 nM (for elongation rate analysis) or 3.5 nM (for side binding  
902 analysis) biotinylated inactivated heavy meromyosin (in LS TBS) incubation for 10 min at RT.  
903 The chambers were washed with 20 mg/mL BSA in 50 mM Tris pH 7.5, 600 mM NaCl, and  
904 incubated with 20 mg/mL BSA in LS TBS for 10 min at RT. Actin was diluted to a final  
905 concentration of 2.1 μM with 20% Alexa-647 labeling in 1X TIRF buffer (final concentrations:  
906 50 mM KCl, 2 mM MgCl<sub>2</sub>, 2 mM EGTA pH 8.0, 10 mM Imidazole pH 7.0, 25 mM glucose, 1  
907 mM Trolox, 0.5% methylcellulose (400 cP), 20 mM 2-mercaptoethanol, 0.4 mM ATP, 20  
908 mg/mL BSA, 0.02 mg/mL catalase, 0.1 mg/mL glucose oxidase, 1 mM 4-nitrobenzyl alcohol,  
909 and 0.5 mM propyl gallate) and allowed to polymerize on the slide for 5 minutes at room  
910 temperature. Excess actin was removed by two washes, each time using 40 μL of 1X TIRF  
911 buffer. A separate mixture of 1 μM actin with 20% Alexa-647 labeling containing desired  
912 proteins in 1X TIRF buffer was then added to the wells to start data acquisition. Time lapse  
913 images were acquired using the following setups. Experiments involving unlabeled HPO-30 ICD  
914 and CapZ for elongation rate analysis of actin<sup>AF647</sup>: 640-nm laser, 5% power, 50 ms exposure  
915 time, and a 5-s interval between exposures; experiments involving CapZ<sup>AF488</sup>: 488-nm laser  
916 (15% power, 50 ms exposure time) and 640-nm laser (5% power, 50 ms exposure time),  
917 alternating between 20 consecutive exposures in the 488-nm channel for CapZ<sup>AF488</sup> and one  
918 exposure in the 640-nm channel for actin<sup>AF647</sup>, with a 500-ms interval between exposures;  
919 experiments involving HPO-30 ICD<sup>AF546</sup>: 561-nm laser (10% power, 50 or 100 ms exposure  
920 time) and 640-nm laser (5% power, 50 ms exposure time), alternating between 20 consecutive  
921 exposures in the 561-nm channel for ICD<sup>AF546</sup> and one exposure in the 640-nm channel for  
922 actin<sup>AF647</sup>, with a 500-ms interval between exposures.

923

924 ***smTIRF data processing - actin elongation rate measurement***

925 Time lapses were opened in ImageJ and the background removed using a rolling ball radius of 10  
926 pixels. The length of actin filaments was calculated using the Filament Length ImageJ plugin,  
927 kindly provided by Jeff Kuhn, using a Gaussian-Radius of 1.5-2, determined for each individual  
928 movie (Kuhn and Pollard, 2005). The length (in microns) was converted to subunits using the  
929 established value of 370 actin subunits /  $\mu\text{m}$  (Huxley and Brown, 1967). Time points were taken  
930 from NIS Elements software. Filaments were only selected if they were present within the first  
931 10 frames of the movie and did not leave the frame during the course of the video. 10 time points  
932 were selected and the length at each point was calculated, and the average slope was used for the  
933 actin elongation rate. ANOVA with Dunn-Tukey tests were used to determine significance.

934

935 ***smTIRF data processing - side-binding/capping analysis***

936 Time lapses were opened in ImageJ and the background removed using a rolling ball radius  
937 of 10 pixels. Only filaments present at the beginning of the videos and those that did not leave  
938 the frame during the duration of the video were selected. Analysis was performed in a single-  
939 blinded manner. Side binding events were determined if they met the following criteria: 1) the  
940 ICD/empty tag puncta must be present for more than one frame; 2) the ICD/empty tag puncta  
941 must move with the filament at least once; 3) the filament must not move away from the  
942 ICD/empty tag puncta; 4) the HPO-30/vector puncta must be smaller than a circle with a radius  
943 of 4 pixels. Capping events were confirmed by the absence of growth with puncta present and, if  
944 available, growth from the end capped after the puncta leaves the filament. A Student's t-test was  
945 used to determine significance between ICD and tag reactions.

946

947 ***Actin pelleting assay***

948 Actin pelleting assays were performed based on (Heier et al., 2017) with modifications.  
949 Actin was pre-polymerized at room temperature overnight by addition of 1X 50KMEH5Gd.  
950 Reactions (60  $\mu\text{L}$ ) were assembled by mixing 2  $\mu\text{M}$  actin and 5  $\mu\text{M}$  protein (in the same  
951 50KMEH5Gd buffer), which were then allowed to bind at room temperature for 30 minutes.  
952 Reactions were centrifuged at 100,000 g at 4 °C for 30 min in a Type 42.2 Ti rotor in a Beckman  
953 ultracentrifuge. 40  $\mu\text{L}$  of the supernatant was removed and mixed with SDS, and the remaining  
954 ~15  $\mu\text{L}$  was removed and discarded. The pellet was dissolved by the addition of 40  $\mu\text{L}$  of G-

955 buffer, followed by brief pipetting and vortexing, and allowed to sit at room temperature for 5  
956 min before the liquid was removed and mixed with SDS PAGE loading buffer. The intensity of  
957 the supernatant and pellet bands on SDS PAGE gels were measured using ImageJ. The total  
958 intensity of the supernatant and pellet bands, and the percentage of intensity from the pellet and  
959 the supernatant were calculated. The percentage pelleted protein was calculated by subtracting  
960 the percentage of intensity from the pelleted protein in the absence of actin from the percentage  
961 of intensity from the pelleted protein in the presence of actin. For example, in Figure 5A, the  
962 intensity of BSA from lanes 1 and 2 was summed and the percentage of intensity from 1 and  
963 from 2 were calculated. This was repeated for lanes 3 and 4, then the percentage intensity of lane  
964 2 was subtracted from lane 4. ANOVA with Dunn-Tukey tests were used to determine  
965 significance.

966

### 967 *Actin pelleting competition assays*

968 Actin pelleting competition assays were performed nearly identically to the actin  
969 pelleting assay described above, except that after 30 minutes of incubation of 5  $\mu$ M HPO-30 ICD  
970 proteins with 2  $\mu$ M actin, 600 nM CapZ was added and incubated for 5 minutes before  
971 ultracentrifugation. The intensity of the top bands for CapZ in the pellet were calculated for all  
972 reactions and corrected for the intensity of CapZ pelleted without actin. The relative intensity  
973 was calculated by dividing the intensity of the lane by CapZ with actin alone. For example, in  
974 Figure 6D, the intensity of lane 2 was subtracted from lanes 4, 6, 8, and 10. Then, the corrected  
975 intensity of lane 4 was divided by that of lane 2. ANOVA with Dunn-Tukey tests were used to  
976 determine significance.

977

### 978 *S2 cell culture and transfection*

979 Drosophila S2 cells were grown in Schneider's media (Thermo Fisher) supplemented with 10%  
980 heat-inactivated FBS (Life Technologies) and 50 U/mL penicillin-streptomycin (Thermo Fisher).  
981 Cells were transfected with Effectene (Qiagen) and 1  $\mu$ g of total plasmid (either Pactin>HPO-  
982 30:6xMyc (pXD384) or both Pactin>HPO-30:6xMyc (pXD384) and Pactin>HPO-30:HA  
983 (pXD226)).

984

### 985 *Co-immunoprecipitation*

986 S2 cells were harvested 72 hours after transfection. Cells were lysed in RIPA buffer (Thermo  
987 Fisher) with 1x Halt Protease Inhibitor Cocktail (ThermoFisher) for 30 minutes on ice. Cell  
988 lysates were incubated with anti-HA affinity gel beads (Sigma E6779-1ML) for 1 hour at 4°C  
989 with rotation. Proteins were eluted at 80°C in NuPAGE LDS Sample Buffer (Life Technologies)  
990 supplemented with DTT (GoldBio) and detected using Western blot with mouse antibody to HA  
991 (1:1000, Sigma H3663), rabbit antibody to Myc (1:1000, Santa Cruz Biotechnology sc-789), and  
992 HRP-conjugated goat antibodies to mouse (1:20,000, Jackson Immuno Research).

993

### 994 **Acknowledgements**

995 We thank ResearchIT at Iowa State University for installing AlphaFold 2 and AlphaFold  
996 Multimer; Daniel Boesch for help with submitting AlphaFold prediction tasks; Scott Nelson at  
997 Iowa State for guidance with CD spectroscopy; Xuefeng Wang at Iowa State for the initial setup  
998 of smTIRF experiments; Aubrey Sijo-Gonzales, Finlan Rhodes, Leyuan Loh, Ganesh Prasad,  
999 Simanta Mitra, and the ResearchIT at Iowa State University for establishing a web-based  
1000 application (<https://biochempy.bb.iastate.edu>) for data visualization; and Michael Rosen at UT  
1001 Southwestern for sharing FKBP/FRB constructs. This work was supported by funding from the  
1002 National Institutes of Health (R35-GM128786) and start-up funds from the Iowa State University  
1003 and the Roy J. Carver Charitable Trust to B.C., National Institutes of Health (R35-GM136319) to  
1004 B.J.N., National Institutes of Health (R01-GM132561) to J.R., Howard Hughes Medical Institute  
1005 and the National Institute of Neurological Disorders and Stroke (1R01NS082208) to K.S., and the  
1006 National Science Foundation Graduate Research Fellowship and a training grant from the National  
1007 Institutes of Health to R.S.

1008

### 1009 **Author contributions**

1010 B.C. conceived and oversaw the project. B.N. oversaw single molecule experiments. J.R. oversaw  
1011 NMR experiments. D.A.K. purified proteins and performed biochemical experiments. D.A.K.  
1012 performed AlphaFold predictions. D.A.K. and J.R. performed NMR measurements. D.A.K. and  
1013 H.Y.N-O. performed single molecule TIRF experiments. R.S. performed co-immunoprecipitation  
1014 experiments under the supervision of K.S. D.A.K. and B.C. drafted the manuscript and prepared  
1015 the figures with assistance from all the authors.

1016



1017 **Competing interests**

1018 The authors declare no competing interests.

1019

1020 **Additional Information**

1021 Correspondence and request for materials should be addressed to stone@iastate.edu

1022

1023 **Supplemental materials**

1024 **Video 1. CapZ capping event example 1.** Related to Figure 6A, top. Time lapse of SNAP<sup>AF488</sup>-

1025 CapZ (green) bound to the end of actin filaments (red) obtained by smTIRF microscopy. Video

1026 length of 1200 frames at 120 frames per second. The filament in the top left corner is the one

1027 showcased in Figure 6A, top.

1028

1029 **Video 2. CapZ capping event example 2.** Related to Figure 6A, top. Time lapse of SNAP<sup>AF488</sup>-

1030 CapZ (green) bound to the end of an actin filament (red) obtained by smTIRF microscopy. Video

1031 length of 1800 frames at 120 frames per second.

1032

1033 **Video 3. HPO-30 ICD side binding event example 1.** Related to Figure 6A, bottom.

1034 SNAP<sup>AF546</sup>-F/F-ICD (cyan) bound to the side of an actin filament (red) obtained by smTIRF

1035 microscopy. Video length of 1000 frames at 100 frames per second.

1036

1037 **Video 4. HPO-30 ICD side binding event example 2.** Related to Figure 6A, bottom.

1038 SNAP<sup>AF546</sup>-F/F-ICD (cyan) bound to the side of an actin filament (red) obtained by smTIRF

1039 microscopy. Video length of 350 frames at 35 frames per second.

1040

1041 **Video 5. Actin elongation rate comparison.** Related to Figure 6C. Representative smTIRF time

1042 lapses used to quantify the elongation rate of actin filaments. Video shows a random selection of

1043 actin filaments from each condition tested. Video length of 15 minutes and 181 frames was

1044 compressed to 9 seconds.

1045

1046

1047

1048 **Supplemental Table 1: Sequences of recombinant proteins used in this study.**

| Construct name | Description                                           | Plasmid Identity | Sequence                                                                                                                                                                                                                                                                                              | Source or reference |
|----------------|-------------------------------------------------------|------------------|-------------------------------------------------------------------------------------------------------------------------------------------------------------------------------------------------------------------------------------------------------------------------------------------------------|---------------------|
| GST-ICD        | GST-thrombin-TEV- <i>ceHPO</i> -30 ICD (a.a. 229-279) | pDK079           | MSPIILGYWKIKGLVQPTRLLLEYLEEKYEEHLYERDEGDKWRNKKFELGLEFPNLPY YIDGDVKLTQSMAIIRYIADKHNMLGGCPKERAESMLEGAVLDIRYGVSR IAYSKD FETLKVDFLSKLPEMLKMFEDRLCHKTYLNGDHVTHPDFMLYDALDVVLYMDPMCLD AFPKLVCFKKRIEAI PQIDKYLKSSKYIAWPLQGWQATFGGGDHPKSDLVPRGSEN LYFQGHMTSKHAHDVCCTSRKEYREQTWKWNNGLILKTGRVNHQSHRPFVVIDDDSS M  | Zou, 2018           |
| GST-ICD Δ1     | GST-thrombin-TEV- <i>ceHPO</i> -30 ICD Ala 229-233    | pDK325           | MSPIILGYWKIKGLVQPTRLLLEYLEEKYEEHLYERDEGDKWRNKKFELGLEFPNLPY YIDGDVKLTQSMAIIRYIADKHNMLGGCPKERAESMLEGAVLDIRYGVSR IAYSKD FETLKVDFLSKLPEMLKMFEDRLCHKTYLNGDHVTHPDFMLYDALDVVLYMDPMCLD AFPKLVCFKKRIEAI PQIDKYLKSSKYIAWPLQGWQATFGGGDHPKSDLVPRGSEN LYFQGHMAAAAAHDVCCTSRKEYREQTWKWNNGLILKTGRVNHQSHRPFVVIDDDSS M  | Zou, 2018           |
| GST-ICD Δ2     | GST-thrombin-TEV- <i>ceHPO</i> -30 ICD Ala 234-238    | pDK326           | MSPIILGYWKIKGLVQPTRLLLEYLEEKYEEHLYERDEGDKWRNKKFELGLEFPNLPY YIDGDVKLTQSMAIIRYIADKHNMLGGCPKERAESMLEGAVLDIRYGVSR IAYSKD FETLKVDFLSKLPEMLKMFEDRLCHKTYLNGDHVTHPDFMLYDALDVVLYMDPMCLD AFPKLVCFKKRIEAI PQIDKYLKSSKYIAWPLQGWQATFGGGDHPKSDLVPRGSEN LYFQGHMTSKHAAAAAATS RKEYREQTWKWNNGLILKTGRVNHQSHRPFVVIDDDSS M | Zou, 2018           |
| GST-ICD Δ3     | GST-thrombin-TEV- <i>ceHPO</i> -30 ICD Ala 239-243    | pDK327           | MSPIILGYWKIKGLVQPTRLLLEYLEEKYEEHLYERDEGDKWRNKKFELGLEFPNLPY YIDGDVKLTQSMAIIRYIADKHNMLGGCPKERAESMLEGAVLDIRYGVSR IAYSKD FETLKVDFLSKLPEMLKMFEDRLCHKTYLNGDHVTHPDFMLYDALDVVLYMDPMCLD AFPKLVCFKKRIEAI PQIDKYLKSSKYIAWPLQGWQATFGGGDHPKSDLVPRGSEN LYFQGHMTSKHAHDVCCAAAAAYREQTWKWNNGLILKTGRVNHQSHRPFVVIDDDSS M  | Zou, 2018           |
| GST-ICD Δ4     | GST-thrombin-TEV- <i>ceHPO</i> -30 ICD Ala 244-248    | pDK328           | MSPIILGYWKIKGLVQPTRLLLEYLEEKYEEHLYERDEGDKWRNKKFELGLEFPNLPY YIDGDVKLTQSMAIIRYIADKHNMLGGCPKERAESMLEGAVLDIRYGVSR IAYSKD FETLKVDFLSKLPEMLKMFEDRLCHKTYLNGDHVTHPDFMLYDALDVVLYMDPMCLD AFPKLVCFKKRIEAI PQIDKYLKSSKYIAWPLQGWQATFGGGDHPKSDLVPRGSEN LYFQGHMTSKHAHDVCCTSRKEAAAAAKWNNGLILKTGRVNHQSHRPFVVIDDDSS M   | Zou, 2018           |
| GST-ICD Δ5     | GST-thrombin-TEV- <i>ceHPO</i> -30 ICD Ala 249-253    | pDK329           | MSPIILGYWKIKGLVQPTRLLLEYLEEKYEEHLYERDEGDKWRNKKFELGLEFPNLPY YIDGDVKLTQSMAIIRYIADKHNMLGGCPKERAESMLEGAVLDIRYGVSR IAYSKD FETLKVDFLSKLPEMLKMFEDRLCHKTYLNGDHVTHPDFMLYDALDVVLYMDPMCLD AFPKLVCFKKRIEAI PQIDKYLKSSKYIAWPLQGWQATFGGGDHPKSDLVPRGSEN LYFQGHMTSKHAHDVCCTSRKEYREQTAAAAAGLILKTGRVNHQSHRPFVVIDDDSS M  | Zou, 2018           |
| GST-ICD Δ6     | GST-thrombin-TEV- <i>ceHPO</i> -30 ICD Ala 254-258    | pDK330           | MSPIILGYWKIKGLVQPTRLLLEYLEEKYEEHLYERDEGDKWRNKKFELGLEFPNLPY YIDGDVKLTQSMAIIRYIADKHNMLGGCPKERAESMLEGAVLDIRYGVSR IAYSKD FETLKVDFLSKLPEMLKMFEDRLCHKTYLNGDHVTHPDFMLYDALDVVLYMDPMCLD AFPKLVCFKKRIEAI PQIDKYLKSSKYIAWPLQGWQATFGGGDHPKSDLVPRGSEN LYFQGHMTSKHAHDVCCTSRKEYREQTWKWNNAAAAATGRVNHQSHRPFVVIDDDSS M  | Zou, 2018           |
| GST-ICD Δ7     | GST-thrombin-TEV- <i>ceHPO</i> -30 ICD Ala 259-263    | pDK331           | MSPIILGYWKIKGLVQPTRLLLEYLEEKYEEHLYERDEGDKWRNKKFELGLEFPNLPY YIDGDVKLTQSMAIIRYIADKHNMLGGCPKERAESMLEGAVLDIRYGVSR IAYSKD FETLKVDFLSKLPEMLKMFEDRLCHKTYLNGDHVTHPDFMLYDALDVVLYMDPMCLD AFPKLVCFKKRIEAI PQIDKYLKSSKYIAWPLQGWQATFGGGDHPKSDLVPRGSEN LYFQGHMTSKHAHDVCCTSRKEYREQTWKWNNGLILKAAAAAHQSHRPFVVIDDDSS M  | Zou, 2018           |
| ICD-GST        | <i>ceHPO</i> -30 ICD (a.a. 229-279)-GG-3C-GST         | pDK238           | MTSKHAHDVCCTSRKEYREQTWKWNNGLILKTGRVNHQSHRPFVVIDDDSSMGGLEV LFGQPMSPILGYWKIKGLVQPTRLLLEYLEEKYEEHLYERDEGDKWRNKKFELGLEFPNLPY YIDGDVKLTQSMAIIRYIADKHNMLGGCPKERAESMLEGAVLDIRYGVSR IAYSKD FETLKVDFLSKLPEMLKMFEDRLCHKTYLNGDHVTHPDFMLYDALDVVLYMD PMCLDAFPKLVCFKKRIEAI PQIDKYLKSSKYIAWPLQGWQATFGGGDHPK          | This paper          |
| ICD Δ8 - GST   | <i>ceHPO</i> -30 ICD Ala 264-268                      | pDK257           | MTSKHAHDVCCTSRKEYREQTWKWNNGLILKTGRVNHQSHRPFVVIDDDSSMGGLEV LFGQPMSPILGYWKIKGLVQPTRLLLEYLEEKYEEHLYERDEGDKWRNKKFELGLEFPNLPY YIDGDVKLTQSMAIIRYIADKHNMLGGCPKERAESMLEGAVLDIRYGVSR IAYSKD FETLKVDFLSKLPEMLKMFEDRLCHKTYLNGDHVTHPDFMLYDALDVVLYMD PMCLDAFPKLVCFKKRIEAI PQIDKYLKSSKYIAWPLQGWQATFGGGDHPK          | This paper          |
| ICD Δ9 - GST   | <i>ceHPO</i> -30 ICD Ala 269-273                      | pDK258           | MTSKHAHDVCCTSRKEYREQTWKWNNGLILKTGRVNHQSHRPFVVIDDDSSMGGLEV LFGQPMSPILGYWKIKGLVQPTRLLLEYLEEKYEEHLYERDEGDKWRNKKFELGLEFPNLPY YIDGDVKLTQSMAIIRYIADKHNMLGGCPKERAESMLEGAVLDIRYGVSR IAYSKD FETLKVDFLSKLPEMLKMFEDRLCHKTYLNGDHVTHPDFMLYDALDVVLYMD PMCLDAFPKLVCFKKRIEAI PQIDKYLKSSKYIAWPLQGWQATFGGGDHPK          | This paper          |

|               |                                                                            |        |                                                                                                                                                                                                                                                                                                                                                                                                                                                                                                                                                                                                                                                                                                                                                                                                                                                                                                     |            |
|---------------|----------------------------------------------------------------------------|--------|-----------------------------------------------------------------------------------------------------------------------------------------------------------------------------------------------------------------------------------------------------------------------------------------------------------------------------------------------------------------------------------------------------------------------------------------------------------------------------------------------------------------------------------------------------------------------------------------------------------------------------------------------------------------------------------------------------------------------------------------------------------------------------------------------------------------------------------------------------------------------------------------------------|------------|
| ICD Δ10 - GST | ceHPO-30 ICD Ala 274-279                                                   | pDK259 | M_TSKHAHDVCTSRKEYREQTKWKNNGLILKTGRVNHQSHRPFVVI AAAAAAGGLEV LFQGPMSPI LGYWKIKGLVQPTRLLLEYLEEKYEELHYERDEGDKWRNKKFELGLEFPNL PYYIDGDVKLTQSMAI IRYIADKHNMLGGCPKERA EISMLEGAVLDIRYGVSR IAYSKDFETLKVDFLSKLP EMLKMFEDRLCHKTYLNGDHVTHPDMFLYDALDVVLYMD PMCLDAFPKLVCFKKRIEAI PQIDKYLKSSKYIAWPLQGWQATFGGGDHPFK                                                                                                                                                                                                                                                                                                                                                                                                                                                                                                                                                                                                  | This paper |
| GST-ICD Δ11   | GST-thrombin-TEV-ceHPO-30 ICD GGS 249-258                                  | pDK332 | MSPILGYWKIKGLVQPTRLLLEYLEEKYEELHYERDEGDKWRNKKFELGLEFPNL PYYIDGDVKLTQSMAI IRYIADKHNMLGGCPKERA EISMLEGAVLDIRYGVSR IAYSKDFETLKVDFLSKLP EMLKMFEDRLCHKTYLNGDHVTHPDMFLYDALDVVLYMDPMCLD AFPPKLVCFKKRIEAI PQIDKYLKSSKYIAWPLQGWQATFGGGDHPFKSDLVPRGSEN LYFQGHMTSKHAHDVCTSRKEYREQTGGSGGSGSGTGRVNHQSHRPFVVIDDDSS M                                                                                                                                                                                                                                                                                                                                                                                                                                                                                                                                                                                              | This paper |
| GST-ICD Δ12   | GST-thrombin-TEV-ceHPO-30 ICD GGS 264-273                                  | pDK333 | MSPILGYWKIKGLVQPTRLLLEYLEEKYEELHYERDEGDKWRNKKFELGLEFPNL PYYIDGDVKLTQSMAI IRYIADKHNMLGGCPKERA EISMLEGAVLDIRYGVSR IAYSKDFETLKVDFLSKLP EMLKMFEDRLCHKTYLNGDHVTHPDMFLYDALDVVLYMDPMCLD AFPPKLVCFKKRIEAI PQIDKYLKSSKYIAWPLQGWQATFGGGDHPFKSDLVPRGSEN LYFQGHMTSKHAHDVCTSRKEYREQTKWKNNAAAAATGRVNHGSGSGGSGGSDDDSS M                                                                                                                                                                                                                                                                                                                                                                                                                                                                                                                                                                                            | This paper |
| GST-ICD Δ13   | GST-thrombin-TEV-ceHPO-30 ICD GGS 264-275                                  | pDK334 | MSPILGYWKIKGLVQPTRLLLEYLEEKYEELHYERDEGDKWRNKKFELGLEFPNL PYYIDGDVKLTQSMAI IRYIADKHNMLGGCPKERA EISMLEGAVLDIRYGVSR IAYSKDFETLKVDFLSKLP EMLKMFEDRLCHKTYLNGDHVTHPDMFLYDALDVVLYMDPMCLD AFPPKLVCFKKRIEAI PQIDKYLKSSKYIAWPLQGWQATFGGGDHPFKSDLVPRGSEN LYFQGHMTSKHAHDVCTSRKEYREQTGGSGGSGSGSGSGSGSGSGSGSDSS M                                                                                                                                                                                                                                                                                                                                                                                                                                                                                                                                                                                                  | This paper |
| GST-ICD Δ14   | GST-thrombin-TEV-ceHPO-30 ICD GGS 229-248                                  | pDK335 | MSPILGYWKIKGLVQPTRLLLEYLEEKYEELHYERDEGDKWRNKKFELGLEFPNL PYYIDGDVKLTQSMAI IRYIADKHNMLGGCPKERA EISMLEGAVLDIRYGVSR IAYSKDFETLKVDFLSKLP EMLKMFEDRLCHKTYLNGDHVTHPDMFLYDALDVVLYMDPMCLD AFPPKLVCFKKRIEAI PQIDKYLKSSKYIAWPLQGWQATFGGGDHPFKSDLVPRGSEN LYFQGHMGGSGSGSGSGSGSGSGSGSGGKWKNNGLILKTGRVNHQSHRPFVVIDDDSS M                                                                                                                                                                                                                                                                                                                                                                                                                                                                                                                                                                                           | This paper |
| ICD-mEGFP     | GST-TEV-ceHPO-30 ICD 229-279 – GGS2-mEGFP, GST tag removed by TEV cleavage | pDK184 | MSPILGYWKIKGLVQPTRLLLEYLEEKYEELHYERDEGDKWRNKKFELGLEFPNL PYYIDGDVKLTQSMAI IRYIADKHNMLGGCPKERA EISMLEGAVLDIRYGVSR IAYSKDFETLKVDFLSKLP EMLKMFEDRLCHKTYLNGDHVTHPDMFLYDALDVVLYMDPMCLD AFPPKLVCFKKRIEAI PQIDKYLKSSKYIAWPLQGWQATFGGGDHPFKSDLVPRGSEN LYFQGHMTSKHAHDVCTSRKEYREQTKWKNNGLILKTGRVNHQSHRPFVVIDDDSS MGGSGGSMVSKGEELFTGVVPI LVELDGDVNGHKFSVSGEGEDATYKGLTLKFICT TGKLPVPWPVLVTTLYGVQCFSRYPDHMKQHDFKSAPEGYQERTIFFKDDGNY KTRAEVVFEGDTLVNRIELGIDFKEDGNILGHKLEYNVNSHNVI MADKQNGIKV NFKIRHNIEDGSVQLADHYQNTPI GDGPVLLPDNHYLSTQSKLSKDPNEKRDMVL KEKVTAAGITLGMDELKY                                                                                                                                                                                                                                                                                                                                           | This paper |
| ICD           | MBP-TEV-ceHPO-30 ICD 229-279, MBP tag removed by TEV cleavage              | pDK092 | MKIEEGKLV I WINGDKYNGLA E V G K K F E K D T G I K V T V E H P D K L E E K F P Q V A A T G D G P D I I F W A H D R F G G Y A Q S G L L A E I T P D K A F Q D K L Y P F T W D A V R Y N G K L I A Y P I A V E A L S L I Y N K D L L P N P P K T W E E I P A L D K E L K A K G S A L M F N L Q E P Y F T W P L I A A D G G Y A F K Y E N G Y D I K D V G V N A G A K A G L T F L V D L I K N K H M N A D T D Y S I A E A A F N K G E T A M T I N G P W A S N I D T S K V N Y G V T V L P T F K G Q P S K P F V G V L S A G I N A A S P N K E L A K E F L E N Y L L T D E G L E A V N K D K P L G A V A L K S Y E E L A K D P R I A A T M E N A Q K G E I M P N I P Q M S A F W Y A V R T A V I N A A S G R Q T V D E A L K D A Q T N S S N N N N N N N N N N L G I E G R I S E F E N L Y F Q G H T S K H A H D V C C T S R K E Y R E Q T K W K N N G L I L K T G R V N H Q S H R P F V V I D D D S S M | This paper |
| DLC8-ICD      | DLC8-TEV-ceHPO-30 ICD 229-279-His6                                         | pDK268 | M S D R K A V I K N A D M S E E M Q Q D A V D C A T Q A L E K Y N I E K D I A A Y I K K E F D K K Y N P T W H C I V G R N F G S Y V T H E T R H F I Y F Y L G Q V A I L L F K S G G S E N L Y F Q G H M T S K H A H D V C C T S R K E Y R E Q T K W K N N G L I L K T G R V N H Q S H R P F V V I D D D S S M H H H H H H H                                                                                                                                                                                                                                                                                                                                                                                                                                                                                                                                                                         | This paper |
| GB1-ICD       | GB1-thrombin-ceHPO-30 ICD 229-279-His6                                     | pDK239 | M Q Y K L A L N G K T L K G E T T T E A V D A A T A E K V F K Q Y A N D N G V D G E W T Y D D A T K T F T V T E L V P R G S T S K H A H D V C C T S R K E Y R E Q T K W K N N G L I L K T G R V N H Q S H R P F V V I D D D S S M H H H H H                                                                                                                                                                                                                                                                                                                                                                                                                                                                                                                                                                                                                                                         | This paper |
| sumo-ICD      | His10-Sumo-GGS-ceHPO-30 ICD 229-279                                        | pDK219 | M G H H H H H H H H H H S S G H I E G R H M A S M S D S E V N Q E A K P E V K P E V K P E T H I N L K V S D G S S E I F F K I K K T P L R R L M E A F A K R Q G K E M D S L R F L Y D G I R I Q A D Q T P E D L D M E D N D I E A H R E Q I G G S T S K H A H D V C C T S R K E Y R E Q T K W K N N G L I L K T G R V N H Q S H R P F V V I D D D S S M                                                                                                                                                                                                                                                                                                                                                                                                                                                                                                                                             | This paper |
| GB1-FKBP-ICD  | GB1-thrombin-FKBP-GGS3-ceHPO-30 ICD 229-279 – His6                         | pDK264 | M Q Y K L A L N G K T L K G E T T T E A V D A A T A E K V F K Q Y A N D N G V D G E W T Y D D A T K T F T V T E L V P R G S H M V Q V E T I S P G D R T F P K R G Q T C V V H Y T G M L E D G K K F D S S R D R N K P F K F M L G K Q E V I R G W E E G V A Q M S V G Q R A K L T I S P D Y A Y G A T G H P G I I P P H A T L V F D V E L L K L E G G S G G S G S M T S K H A H D V C C T S R K E Y R E Q T K W K N N G L I L K T G R V N H Q S H R P F V V I D D D S S M H H H H H H H                                                                                                                                                                                                                                                                                                                                                                                                             | This paper |
| GB1-FRB-ICD   | GB1-thrombin-FRB-GGS3-ceHPO-30                                             | pDK265 | M Q Y K L A L N G K T L K G E T T T E A V D A A T A E K V F K Q Y A N D N G V D G E W T Y D D A T K T F T V T E L V P R G S H M E L I R V A I L W H E M W H E G L E E A S R L Y F G E R N V K G M F E V L E P L H A M M E R G P Q T L K E T S F N Q A Y G R D L M E A Q E W C R K Y M K S G N V K D L T Q A W D L Y Y H V F R R I S K Q G G S G S G                                                                                                                                                                                                                                                                                                                                                                                                                                                                                                                                                 | This paper |

|                     |                                                                          |        |                                                                                                                                                                                                                                                                                                                                                                                                                                                                                                                                                                                                                                                                                                                                                                                                                                                                                                                                                                                                                      |                                                                                                      |
|---------------------|--------------------------------------------------------------------------|--------|----------------------------------------------------------------------------------------------------------------------------------------------------------------------------------------------------------------------------------------------------------------------------------------------------------------------------------------------------------------------------------------------------------------------------------------------------------------------------------------------------------------------------------------------------------------------------------------------------------------------------------------------------------------------------------------------------------------------------------------------------------------------------------------------------------------------------------------------------------------------------------------------------------------------------------------------------------------------------------------------------------------------|------------------------------------------------------------------------------------------------------|
|                     | ICD 229-279<br>– His6                                                    |        | GSMTSKHAHDVCCTSRKEYREQTKWKNNGLILKTRGVNHQSHRPFVVIDDDSSMH<br>HHH                                                                                                                                                                                                                                                                                                                                                                                                                                                                                                                                                                                                                                                                                                                                                                                                                                                                                                                                                       |                                                                                                      |
| GB1-FKBP            | GB1-<br>thrombin-<br>FKBP-GGS3-<br>His6                                  | pDK270 | MQYKLALNGKTLKGETTTEAVDAATAEKVFKQYANDNGVDGEWYDDATKTFVTTEL<br>VPRGSHMVQVETISPGDGRTFPKRGQTCVVHYTGMLEDGKFFDSSRDRNPKFKFMLG<br>KQEVIRGWEEGVAQMSVQRAKLTISPDIYAGATGHPGIIPPHATLVDFVELLKLKLEG<br>GSGGSGGSHHHHHH                                                                                                                                                                                                                                                                                                                                                                                                                                                                                                                                                                                                                                                                                                                                                                                                                | This paper                                                                                           |
| GB1-FRB             | GB1-<br>thrombin-<br>FRB-GGS3-<br>His6                                   | pDK271 | MQYKLALNGKTLKGETTTEAVDAATAEKVFKQYANDNGVDGEWYDDATKTFVTTEL<br>VPRGSHMELIRVAIILWHEMWHEGLEEASRLYFGERNVKGMFEVLEPLHAMMERGPQT<br>LKETSFNQAYGRDLMEAQEWCRKYMKSGNVKDLTQAWDLYYHVFRRIISKQGGSGGSG<br>GSHHHHHH                                                                                                                                                                                                                                                                                                                                                                                                                                                                                                                                                                                                                                                                                                                                                                                                                     | This paper                                                                                           |
| GB1-FKBP-<br>ICD Δ5 | GB1-<br>thrombin-<br>FKBP-GGS3-<br>ceHPO-30<br>ICD Ala 249-<br>253– His6 | pDK274 | MQYKLALNGKTLKGETTTEAVDAATAEKVFKQYANDNGVDGEWYDDATKTFVTTEL<br>VPRGSHMVQVETISPGDGRTFPKRGQTCVVHYTGMLEDGKFFDSSRDRNPKFKFMLG<br>KQEVIRGWEEGVAQMSVQRAKLTISPDIYAGATGHPGIIPPHATLVDFVELLKLKLEG<br>GSGGSGGSM <sup>T</sup> SKHAHDVCCTSRKEYREQTA <sup>AAAA</sup> AGLILKTRGVNHQSHRPFVVIDDD<br>SSMH <sup>HHHHH</sup>                                                                                                                                                                                                                                                                                                                                                                                                                                                                                                                                                                                                                                                                                                                 | This paper                                                                                           |
| GB1-FRB-<br>ICD Δ5  | GB1-FRB-<br>thrombin-<br>GGS3-<br>ceHPO-30<br>ICD Ala 249-<br>253– His6  | pDK275 | QYKLALNGKTLKGETTTEAVDAATAEKVFKQYANDNGVDGEWYDDATKTFVTTEL<br>PRGSHMELIRVAIILWHEMWHEGLEEASRLYFGERNVKGMFEVLEPLHAMMERGPQT<br>LKETSFNQAYGRDLMEAQEWCRKYMKSGNVKDLTQAWDLYYHVFRRIISKQGGSGGSGG<br>SMT <sup>T</sup> SKHAHDVCCTSRKEYREQTA <sup>AAAA</sup> AGLILKTRGVNHQSHRPFVVIDDDSSMH <sup>HHHH</sup><br>HH                                                                                                                                                                                                                                                                                                                                                                                                                                                                                                                                                                                                                                                                                                                      | This paper                                                                                           |
| SNAP-<br>FKBP-ICD   | SNAP-FKBP-<br>GGS3-<br>ceHPO-30<br>ICD 229-279-<br>His6                  | pDK283 | MDKDCEMKRTTLDSPGKLELSGCEQGLHEIKLLGKGTSAADAVEVPAPAAVLGGPE<br>PLMQATAWLNAYFHQPEAIEEFPV <sup>ALHHPVFQ</sup> QESFTRQVLWKLKVVKFGEV <sup>ISY</sup><br>QQLAALAGNPAATAAVK <sup>TALSGNPVPI</sup> LIPCHR <sup>VVSSGAVGGYEGGLAVKEWLLAH</sup><br>EGHRLGKPLG <sup>PAGIGAPGSMVQVETIS</sup> PGDGR <sup>TFPKRGQTCVVHYTG</sup> MLEDGK <sup>FFDSSRDRNPKFKF</sup><br>SSRDRNPKFKF <sup>FMLGKQEVIRGWEEGVAQMSVQRAKLTISPDIYAGATGHPGII</sup> PPH<br>ATLVDFVELLKLK <sup>EGSGGSM<sup>T</sup>SKHAHDVCCTSRKEYREQTKWKNNGLILKTRGV</sup><br>NHQSHRPFVVIDDDSSMH <sup>HHHHH</sup>                                                                                                                                                                                                                                                                                                                                                                                                                                                                     | <a href="https://www.addgene.org/101137/">https://www.addgene.org/101137/</a><br>/ and this<br>paper |
| SNAP-FRB-<br>ICD    | SNAP-FRB-<br>GGS3-<br>ceHPO-30<br>ICD 229-279-<br>His6                   | pDK281 | MDKDCEMKRTTLDSPGKLELSGCEQGLHEIKLLGKGTSAADAVEVPAPAAVLGGPE<br>PLMQATAWLNAYFHQPEAIEEFPV <sup>ALHHPVFQ</sup> QESFTRQVLWKLKVVKFGEV <sup>ISY</sup><br>QQLAALAGNPAATAAVK <sup>TALSGNPVPI</sup> LIPCHR <sup>VVSSGAVGGYEGGLAVKEWLLAH</sup><br>EGHRLGKPLG <sup>PAGIGAPGSMELIRVAIILWHEMWHEGLEEASRLYFGERNVKGMFEV</sup><br>LEPLHAMMERGP <sup>QTLKETSFNQAYGRDLMEAQEWCRKYMKSGNVKDLTQAWDLYYHV</sup><br>FRRIISKQGGSGGSG <sup>SMT<sup>T</sup>SKHAHDVCCTSRKEYREQTKWKNNGLILKTRGVNHQSHR</sup><br>PFVVIDDDSSMH <sup>HHHHH</sup>                                                                                                                                                                                                                                                                                                                                                                                                                                                                                                            | <a href="https://www.addgene.org/101137/">https://www.addgene.org/101137/</a><br>/ and this<br>paper |
| SNAP-<br>FKBP       | SNAP-FKBP-<br>GGS3-His6                                                  | pDK282 | MDKDCEMKRTTLDSPGKLELSGCEQGLHEIKLLGKGTSAADAVEVPAPAAVLGGPE<br>PLMQATAWLNAYFHQPEAIEEFPV <sup>ALHHPVFQ</sup> QESFTRQVLWKLKVVKFGEV <sup>ISY</sup><br>QQLAALAGNPAATAAVK <sup>TALSGNPVPI</sup> LIPCHR <sup>VVSSGAVGGYEGGLAVKEWLLAH</sup><br>EGHRLGKPLG <sup>PAGIGAPGSMVQVETIS</sup> PGDGR <sup>TFPKRGQTCVVHYTG</sup> MLEDGK <sup>FFDSSRDRNPKFKF</sup><br>SSRDRNPKFKF <sup>FMLGKQEVIRGWEEGVAQMSVQRAKLTISPDIYAGATGHPGII</sup> PPH<br>ATLVDFVELLKLK <sup>EGSGGSM<sup>T</sup>SKHAHDVCCTSRKEYREQTKWKNNGLILKTRGVNHQSHR</sup><br>PFVVIDDDSSMH <sup>HHHHH</sup>                                                                                                                                                                                                                                                                                                                                                                                                                                                                     | <a href="https://www.addgene.org/101137/">https://www.addgene.org/101137/</a><br>/ and this<br>paper |
| SNAP-FRB            | SNAP-FRB-<br>GGS3-His6                                                   | pDK280 | MDKDCEMKRTTLDSPGKLELSGCEQGLHEIKLLGKGTSAADAVEVPAPAAVLGGPE<br>PLMQATAWLNAYFHQPEAIEEFPV <sup>ALHHPVFQ</sup> QESFTRQVLWKLKVVKFGEV <sup>ISY</sup><br>QQLAALAGNPAATAAVK <sup>TALSGNPVPI</sup> LIPCHR <sup>VVSSGAVGGYEGGLAVKEWLLAH</sup><br>EGHRLGKPLG <sup>PAGIGAPGSMELIRVAIILWHEMWHEGLEEASRLYFGERNVKGMFEV</sup><br>LEPLHAMMERGP <sup>QTLKETSFNQAYGRDLMEAQEWCRKYMKSGNVKDLTQAWDLYYHV</sup><br>FRRIISKQGGSGGSG <sup>SMT<sup>T</sup>SKHAHDVCCTSRKEYREQTKWKNNGLILKTRGVNHQSHR</sup><br>PFVVIDDDSSMH <sup>HHHHH</sup>                                                                                                                                                                                                                                                                                                                                                                                                                                                                                                            | <a href="https://www.addgene.org/101137/">https://www.addgene.org/101137/</a><br>/ and this<br>paper |
| SNAP-CapZ           | His9-SNAP-<br>CapZ β /<br>CapZ α, from<br><i>Gallus gallus</i>           | pDK288 | >His9-SNAP-CapZ β<br>MGHHHHHHHHHENLYFQGEFMDKDCEMKRTTLDSPGKLELSGCEQGLHEIKLLGK<br>GTSADAVEVPAPAAVLGGPEPLMQATAWLNAYFHQPEAIEEFPV <sup>ALHHPVFQ</sup> QES<br>FTRQVLWKLKVVKFGEV <sup>ISYQQLAALAGNPAATAAVK<sup>TALSGNPVPI</sup>LIPCHR<sup>VVSSGAVGGYEGGLAVKEWLLAH</sup></sup><br>PPQIEKNLSDLIDLVP <sup>SLCEDLLSSVDQPLKIARDKVVGKDYLLCDYNRDGDYS</sup><br>PWSNKYDPPLEDGAMP <sup>SARLRKLEVEANNAFDQYRDLYFEGGVSSVYLWDLHDHGFAG</sup><br>VILIKKAGDGSKKIKGCWDSIHVVEVQEKSSGR <sup>TAHYKLTSTVMLWLQTNKTS</sup> GMT<br>NLGGS <sup>LRQMEKDETVSDSSPHIANIGRLVEDMENKIRSTLNEIYFGKTKDIVNGLR</sup><br>SIDAIPDNQYKQLQRELSQVLTQRQIYIQPDN<br><br>>CapZ α<br>MADFEDRVSDEEKVRIA <sup>AKFIT</sup> HAPPG <sup>EFNEVFNDVRLLLNNDNLLREGAAHAFAY</sup><br>NMDQFTPVKIEGYDDQV <sup>LITEHGDLDNGRFLDPRNKISFKFDHLRKEASDPQ</sup> EDTE<br>SALKQWRDACSALRAYVKDHY <sup>PNGFCTVYGKSIDGQQTIIACIESHQFPKNFWNG</sup><br>RWRSEWKF <sup>TITPPTAQVAAVLKIQVHYEDGNVQLVSHKDIQDSVQVSSDVQTAKEF</sup><br>IKIIEAENEYQTAISENYQ <sup>TMSDTTFKALRRQLPVTRTKIDWNKILSYKIGKEMQN</sup><br>A | <a href="https://www.addgene.org/101137/">https://www.addgene.org/101137/</a><br>/ and this<br>paper |
| Sra1                | His6-TEV-<br>hSra1 (1-<br>1253, FL).                                     | pDK116 | MSYYHHHHHHYDIP <sup>TENTENLYFQ</sup> GAMAAQV <sup>TLEDALS</sup> SNVDLLEELPLPDQ <sup>QPCIEPP</sup><br>PSSLLYQPNFNTNFED <sup>RNAFVTGIARYIEQATVHSSM</sup> NEMLEEGQEYAV <sup>MLYTW</sup> RSC<br>SRAIPQVKCNEQPNR <sup>VEIYEK</sup> TV <sup>EVLEPEVTKLMNFMYFQR</sup> NAIERFCGEV <sup>RRLCHA</sup>                                                                                                                                                                                                                                                                                                                                                                                                                                                                                                                                                                                                                                                                                                                          | (Ismail et al., 2009)                                                                                |

|                                      |                                                                      |        |                                                                                                                                                                                                                                                                                                                                                                                                                                                                                                                                                                                                                                                                                                                                                                                                                                                                                                                                                                                                                                                                                                                                                                                                            |                       |
|--------------------------------------|----------------------------------------------------------------------|--------|------------------------------------------------------------------------------------------------------------------------------------------------------------------------------------------------------------------------------------------------------------------------------------------------------------------------------------------------------------------------------------------------------------------------------------------------------------------------------------------------------------------------------------------------------------------------------------------------------------------------------------------------------------------------------------------------------------------------------------------------------------------------------------------------------------------------------------------------------------------------------------------------------------------------------------------------------------------------------------------------------------------------------------------------------------------------------------------------------------------------------------------------------------------------------------------------------------|-----------------------|
|                                      | His6 tag removed by TEV cleavage                                     |        | ERRKDFVSEAYLITLGKFTINMFAVLDELKNNMCKSVKNDHSAYKRAAQFLRKMADPQS IQESQNLMSFLANHNKITQSLQQQLEVISGYEELLADIVNLCVDYENRMYLTPSEK HMLLKVMGFLYLMDSVSNLYKLDACKRINLSKIDKYFKQLQVPLFGDMQIEIAR YIKTSAHYEENKSRWCTSSGSSPQYNICEQMIQIREDHMFPISELARYSNSEVVTG SGRQEAQKTDAEYRKLFDLALQGLQLLSQWSAHVMEVYSWKLVHPTDKYSNKDCPDS AEEYERATRYNYTSEEKFALEVEIAMIKGLQVLMGRMESVFNHARHTVYAAALQDF S QVTLREPLRQAIKKKKNVIQSVLQAIRKTVCWDTGHEPFPNDPALRGEKDPKSGFDI KVPRAVGPSTQLYMRVMTLES LIADKSGSKTLRSSLLEGPTI LDIEAKFHRESFFY THLINFSETLQQCCDLSQLWFREFFLELTMGRRIQFPIEMSMPWILTDLHILETKEAS MMEYVLYSLDLYNDSAHYALTRFNKQFLYDEIEAEVNLCFDQFVYKLDQIFAYYKV MAGSLLDLKRLRSECKNQGATIHLPSPNRVETLLKQRHVQLLGRSIDLNLRLITQRVS AAMYKSLLELAGRFESEDLTSLVELDGLLEINRMTHKLLSRYLTLDFGDFAMFREANH NVSAPYGRITLHVFWELNYDFLPNYCYNGSTNRVVRTVLPFSQEFQRDKQPNAPQY LHGSKALNLAYSSTIYGSYRNFVGPPIHFQVICRLLGYQGI AVVMBEELLVKSLSLQGT ILQYVKTLMVMPKICRLPRHEYGSPGILEFFHHQLKDIVEYAEKLTVCFQNLREVG NAILFCLLIEQSLSELEVCDDLHAAPFQNILPRVHVKEGERLDLAKMKRLESKYAPLH LVPLIERLGTQQIAIAREGDLTKERLCCGLSMFEVILTRIRSFLDDP IWRGPIPS NGVMHVDECVEFHRLWSAMQFVYCI PVGTHEFTVEQCFCGDLHWAGCMIIVLLGQQR RFAVLDFCYHLLKVQKHDGKDEIIKNVPLKMMVERIRKFI LNDEIITILDKYLKSG DGEPTPEHVRCFQPIHQSLASS                                    |                       |
| Nap1                                 | hNap1 (1-1128, FL)                                                   | pDK149 | MSRSVLQPSQQKLAELKTLINLDRGVGMLTRLYNIKKACGDPKAKPSYLIIDKNLES AV KFIIVRKFPAVETRRNNQQLAQLQKEKSEILKNLALYYFTFVDVMEFKDHVCELNIT I DVCQVFFDITVNFDLTKNYLDLIIYTTMLILLSRIEERKAIIGLYNYAHMETHGAS DREYVPRRLGQMIVDYENLPLKMMEEFVPHSKSLSDALISLMQVYPRNLADQWRNAQ LLSLISAPSTMLNPAQSDTMPCEYLSLDAMEKWIIFGFILCHGILNTDATAALNLWKL ALQSSSCLSLFRDEVFHIIHKAADLFVNIRGYNKRINDIRECKEAAVSHAGSMHRR RKFRLRSALKELATVLSQDQGLGPKALFVFMALS FARDEI IWLLRHADNMPKKSAD FIDKHIAELI FYMEELRAHVRYKYPVMQRYVYVQYLSGFDVAVVMBEELLVKSLSLQGT SIIIMSSFVNTMTSLSVKQVEDGEVDFFRGMRDLDFRLQAYTSVSKASLGLADHREL G KMMNTIIFHTKMVDSLVEMLVETS DLSIFCFYSRAFEKMFQCCLELPSQSRYSIAFP LLCTHFMSCTHELCEPERHHIGDRSLSLONMFLDEMAKQARNLITDICTEQCTLSDQ LLLPKHCAKTI SQAVNKKSKKQTGKKGEPEREKPGVESMRKNRLVVTNLDLKHLTALSE LCF SINYPVNMVVEHTFTPREYLTSHLEIRFTKSI VGMTMYNQATQEI AKPSELLT SVRAYMTVLQS IENYVQIDITRVFNVLQQTQHLDSHGEPITISLTYTNWYLETLLR QVSNHGIIAYFPAMKAFVNLPTENELTFNAEEYSDI SEMRSLSELLGPIYGMKFLSESL MWHISSQVAELKLVENVDVLTQMRTSFDKPDQMAALFKRLLSSVDLKRMTIIGV ILSFRSLAQEALRDVLSYHIFFLVSSIEDFKDHI PRETDMKVAMNVYELSSAAGLPC EIDPALVALSSQKSENISPEEEYK IACLMLVAVSLPTLASNGMYSQYSPAIEGHC NNIHCLAKAINQIAAALFTIHKGSIEDRLKEFLALASSLLKIGQETDKTTRNRRES VYLLDMIVQESPF LTMDLLESCFPYVLLRNAYHAYVKQSVTSSA | (Ismail et al., 2009) |
| WAVE1 <sup>230A</sup> <sub>WCA</sub> | MBP-TEV-hWAVE(1) 1-230, MBP tag removed by TEV cleavage              | pDK071 | MKIEEGKLV I WINGDKYNGLAEVGKKFEKDTG I KVTVEHPDKLEEKFPQVAATGDG PDIIFWAHDRFGGYAQSGLLAEITPDKAFQDKLYPFTWDVAVRYNGKLIAYPIAVEAL SLIYNKDLLPNPKTWEIIPALDKELKAKGKSALMFNLQEPYFTWPLIAADGGYAFK YENKDYIDKDVGVNAGAKGLTFVLVDL IKNKHMNADTDYSIAEAAFNKGETAMTIN GPWAWNSIDTSKVNYGVTVLPTFKGQPSKPFVGVLSAGINAASPNKELAKEFLENYL LTDEGLEAVNKDKPLGVAVALKSYEEELAKDPRIATMENAQKGEIMPNI PQMSAFWY AVRTAVINAASGRQTVDEALKDAQTNSSNNNNNNNNNLGIEGRI SEFENLYFQGH MPLVKRNI DPHRLCHTALPRGIKNELECVTNI SLANIIRQLSSLSKYAEDI FGELFN EAHFSFRVNSLQERVDRLSVSVTQLDPKEEELSQDITMRKAFRSSTIQDQLFDR KTLPIPLQETYDVCEQPPLNLTLPYRDDGKEGLKFTYTNPSYFFDLWKEKMLQDTE D KRKEKRKQKQKNLDRPHEPEKVPRAPHDRRREWQKLAQGPPELAEDDANLLHKHIEVA NG                                                                                                                                                                                                                                                                                                                                                                                                                                                                                                                                      | (Chen et al., 2017)   |
| WAVE1 <sup>230W</sup> <sub>CA</sub>  | MBP-TEV-hWAVE(1) 1-230 – GGS6 – VCA, MBP tag removed by TEV cleavage | pDK081 | MKIEEGKLV I WINGDKYNGLAEVGKKFEKDTG I KVTVEHPDKLEEKFPQVAATGDG PDIIFWAHDRFGGYAQSGLLAEITPDKAFQDKLYPFTWDVAVRYNGKLIAYPIAVEAL SLIYNKDLLPNPKTWEIIPALDKELKAKGKSALMFNLQEPYFTWPLIAADGGYAFK YENKDYIDKDVGVNAGAKGLTFVLVDL IKNKHMNADTDYSIAEAAFNKGETAMTIN GPWAWNSIDTSKVNYGVTVLPTFKGQPSKPFVGVLSAGINAASPNKELAKEFLENYL LTDEGLEAVNKDKPLGVAVALKSYEEELAKDPRIATMENAQKGEIMPNI PQMSAFWY AVRTAVINAASGRQTVDEALKDAQTNSSNNNNNNNNNLGIEGRI SEFENLYFQGH MPLVKRNI DPHRLCHTALPRGIKNELECVTNI SLANIIRQLSSLSKYAEDI FGELFN EAHFSFRVNSLQERVDRLSVSVTQLDPKEEELSQDITMRKAFRSSTIQDQLFDR KTLPIPLQETYDVCEQPPLNLTLPYRDDGKEGLKFTYTNPSYFFDLWKEKMLQDTE D KRKEKRKQKQKNLDRPHEPEKVPRAPHDRRREWQKLAQGPPELAEDDANLLHKHIEVA NGGGSGGSGGSGGSGGSGSKRHPSTLPV ISDARSVLLA I RKG IQLRKVVEEQREQE AKHERIENDVATILSRRIAVEYSDSEDDSEFDEVDWLE                                                                                                                                                                                                                                                                                                                                                                                                                                     | (Chen et al., 2017)   |
| Abi2 (1-158)                         | MBP-TEV-hAbi(2) 1-158, MBP tag removed by TEV cleavage               | pDK075 | MKIEEGKLV I WINGDKYNGLAEVGKKFEKDTG I KVTVEHPDKLEEKFPQVAATGDG PDIIFWAHDRFGGYAQSGLLAEITPDKAFQDKLYPFTWDVAVRYNGKLIAYPIAVEAL SLIYNKDLLPNPKTWEIIPALDKELKAKGKSALMFNLQEPYFTWPLIAADGGYAFK YENKDYIDKDVGVNAGAKGLTFVLVDL IKNKHMNADTDYSIAEAAFNKGETAMTIN GPWAWNSIDTSKVNYGVTVLPTFKGQPSKPFVGVLSAGINAASPNKELAKEFLENYL LTDEGLEAVNKDKPLGVAVALKSYEEELAKDPRIATMENAQKGEIMPNI PQMSAFWY                                                                                                                                                                                                                                                                                                                                                                                                                                                                                                                                                                                                                                                                                                                                                                                                                                            | (Ismail et al., 2009) |



|                             |                                                                                       |        |                                                                                                                                                                                                                                                                                                                                                                                                                                                                                                                                                                                                                                                                                                                                                                                                                                                                                                                                                                                                                                                                                                                                                                                                                                                                                                                                                                                                                                                                                                                                                                                                                                                                                                                                                                                                                                                                                                                                                                                                 |                       |
|-----------------------------|---------------------------------------------------------------------------------------|--------|-------------------------------------------------------------------------------------------------------------------------------------------------------------------------------------------------------------------------------------------------------------------------------------------------------------------------------------------------------------------------------------------------------------------------------------------------------------------------------------------------------------------------------------------------------------------------------------------------------------------------------------------------------------------------------------------------------------------------------------------------------------------------------------------------------------------------------------------------------------------------------------------------------------------------------------------------------------------------------------------------------------------------------------------------------------------------------------------------------------------------------------------------------------------------------------------------------------------------------------------------------------------------------------------------------------------------------------------------------------------------------------------------------------------------------------------------------------------------------------------------------------------------------------------------------------------------------------------------------------------------------------------------------------------------------------------------------------------------------------------------------------------------------------------------------------------------------------------------------------------------------------------------------------------------------------------------------------------------------------------------|-----------------------|
|                             |                                                                                       |        | AVRTAVINAASGRQTVDEALKDAQTNSSSSNNNNNNNNNNLGI EGR I SEFENLYFQGH<br>MAELQMLLEEEI PGGRRALFDSYTNLERVADY CENNY IQSADKQRALEETKAYTTQS<br>LASVAYLINTLANNVLQMLDIQASQLRRMESSINHISQTVDIHKEKVARREIGILTT<br>NKNTSRTHKI IAPANLERPVRYIRKPIDYTLDDIGHGVKVVSTQ                                                                                                                                                                                                                                                                                                                                                                                                                                                                                                                                                                                                                                                                                                                                                                                                                                                                                                                                                                                                                                                                                                                                                                                                                                                                                                                                                                                                                                                                                                                                                                                                                                                                                                                                                     |                       |
| Abi2 (1-158)-sortase        | MBP-TEV-hAbi(2) 1-158-LPGTG, MBP tag removed by TEV cleavage                          | pDK255 | MKIEEGKLV I W I N G D K G Y N G L A E V G K K F E K D T G I K V T V E H P D K L E E K F P Q V A A T G D G<br>P D I I F W A H D R F G G Y A Q S G L L A E I T P D K A F Q D K L Y P F T W D A V R Y N G K L I A Y P I A V E A L<br>S L I Y N K D L L P N P P K T W E E I P A L D K E L K A K G S A L M F N L Q E P Y F T W P L I A A D G G Y A F K<br>Y E N G Y D I K D V G V D N A G A K A G L T F L V D L I K N K H M N A D T D Y S I A E A A F N K G E T A M T I N<br>G P W A W S N I D T S K V N Y G V T V L P T F K G Q P S K P F V G V L S A G I N A A S P N K E L A K E F L E N Y L<br>L T D E G L E A V N K D K P L G A V A L K S Y E E E L A K D P R I A A T M E N A Q K G E I M P N I P Q M S A F W Y<br>A V R T A V I N A A S G R Q T V D E A L K D A Q T N S S S N N N N N N N N N L G I E G R I S E F E N L Y F Q G H<br>M A E L Q M L L E E E I P G G R R A L F D S Y T N L E R V A D Y C E N N Y I Q S A D K Q R A L E E T K A Y T T Q S<br>L A S V A Y L I N T L A N N V L Q M L D I Q A S Q L R R M E S S I N H I S Q T V D I H K E K V A R R E I G I L T T<br>N K N T S R T H K I I A P A N L E R P V R Y I R K P I D Y T L D D I G H G V K V S T Q G G L P G T G G                                                                                                                                                                                                                                                                                                                                                                                                                                                                                                                                                                                                                                                                                                                                                                                                            | This paper            |
| (MBP) <sub>2</sub> -Abi2    | 2MBP-Thrombin-StrepII-hAbi(2) 1-158                                                   | pDK119 | MKIEEGKLV I W I N G D K G Y N G L A E V G K K F E K D T G I K V T V E H P D K L E E K F P Q V A A T G D G<br>P D I I F W A H D R F G G Y A Q S G L L A E I T P D K A F Q D K L Y P F T W D A V R Y N G K L I A Y P I A V E A L<br>S L I Y N K D L L P N P P K T W E E I P A L D K E L K A K G S A L M F N L Q E P Y F T W P L I A A D G G Y A F K<br>Y E N G Y D I K D V G V D N A G A K A G L T F L V D L I K N K H M N A D T D Y S I A E A A F N K G E T A M T I N<br>G P W A W S N I D T S K V N Y G V T V L P T F K G Q P S K P F V G V L S A G I N A A S P N K E L A K E F L E N Y L<br>L T D E G L E A V N K D K P L G A V A L K S Y E E E L A K D P R I A A T M E N A Q K G E I M P N I P Q M S A F W Y<br>A V R T A V I N A A S G R Q T V D E A L K D A Q T N S S S L E W S H P Q F E K A G G M K I E E G K L V I W I N G D<br>K G Y N G L A E V G K K F E K D T G I K V T V E H P D K L E E K F P Q V A A T G D G P D I I F W A H D R F G G Y A<br>Q S G L L A E I T P D K A F Q D K L Y P F T W D A V R Y N G K L I A Y P I A V E A L S L I Y N K D L L P N P P K T<br>W E E I P A L D K E L K A K G S A L M F N L Q E P Y F T W P L I A A D G G Y A F K Y E N G Y D I K D V G V D N<br>A G A K A G L T F L V D L I K N K H M N A D T D Y S I A E A A F N K G E T A M T I N G P W A W S N I D T S K V N Y<br>G V T V L P T F K G Q P S K P F V G V L S A G I N A A S P N K E L A K E F L E N Y L L T D E G L E A V N K D K P L<br>G A V A L K S Y E E E L A K D P R I A A T M E N A Q K G E I M P N I P Q M S A F W Y A V R T A V I N A A S G R Q T<br>V D E A L K D A Q T N S S S N N N N N N N N N L G E F L V P R G S W S H P Q F E K A G G H M A E L I K D V G V D N<br>I P G G R R A L F D S Y T N L E R V A D Y C E N N Y I Q S A D K Q R A L E E T K A Y T T Q S L A S V A Y L I N T L<br>A N N V L Q M L D I Q A S Q L R R M E S S I N H I S Q T V D I H K E K V A R R E I G I L T T N K N T S R T H K I I<br>A P A N L E R P V R Y I R K P I D Y T L D D I G H G V K V S T Q | This paper            |
| HSPC300                     | MBP-TEV-hHSPC300, MBP tag removed by TEV cleavage                                     | pDK069 | MKIEEGKLV I W I N G D K G Y N G L A E V G K K F E K D T G I K V T V E H P D K L E E K F P Q V A A T G D G<br>P D I I F W A H D R F G G Y A Q S G L L A E I T P D K A F Q D K L Y P F T W D A V R Y N G K L I A Y P I A V E A L<br>S L I Y N K D L L P N P P K T W E E I P A L D K E L K A K G S A L M F N L Q E P Y F T W P L I A A D G G Y A F K<br>Y E N G Y D I K D V G V D N A G A K A G L T F L V D L I K N K H M N A D T D Y S I A E A A F N K G E T A M T I N<br>G P W A W S N I D T S K V N Y G V T V L P T F K G Q P S K P F V G V L S A G I N A A S P N K E L A K E F L E N Y L<br>L T D E G L E A V N K D K P L G A V A L K S Y E E E L A K D P R I A A T M E N A Q K G E I M P N I P Q M S A F W Y<br>A V R T A V I N A A S G R Q T V D E A L K D A Q T N S S S N N N N N N N N N L G I E G R I S E F E N L Y F Q G H<br>M G A A M A G Q E D P V Q R E I H Q D W A N R E Y I E I I T S S I K K I A D F L N S F D M S C R S R L A T L N E K<br>L T A L E R R I E Y I E A R V T K G E T L T                                                                                                                                                                                                                                                                                                                                                                                                                                                                                                                                                                                                                                                                                                                                                                                                                                                                                                                                                                                           | (Ismail et al., 2009) |
| (MBP) <sub>2</sub> -HSPC300 | 2MBP-Thrombin-StrepII-hHSPC300                                                        | pDK118 | MKIEEGKLV I W I N G D K G Y N G L A E V G K K F E K D T G I K V T V E H P D K L E E K F P Q V A A T G D G<br>P D I I F W A H D R F G G Y A Q S G L L A E I T P D K A F Q D K L Y P F T W D A V R Y N G K L I A Y P I A V E A L<br>S L I Y N K D L L P N P P K T W E E I P A L D K E L K A K G S A L M F N L Q E P Y F T W P L I A A D G G Y A F K<br>Y E N G Y D I K D V G V D N A G A K A G L T F L V D L I K N K H M N A D T D Y S I A E A A F N K G E T A M T I N<br>G P W A W S N I D T S K V N Y G V T V L P T F K G Q P S K P F V G V L S A G I N A A S P N K E L A K E F L E N Y L<br>L T D E G L E A V N K D K P L G A V A L K S Y E E E L A K D P R I A A T M E N A Q K G E I M P N I P Q M S A F W Y<br>A V R T A V I N A A S G R Q T V D E A L K D A Q T N S S S L E W S H P Q F E K A G G M K I E E G K L V I W I N G D<br>K G Y N G L A E V G K K F E K D T G I K V T V E H P D K L E E K F P Q V A A T G D G P D I I F W A H D R F G G Y A<br>Q S G L L A E I T P D K A F Q D K L Y P F T W D A V R Y N G K L I A Y P I A V E A L S L I Y N K D L L P N P P K T<br>W E E I P A L D K E L K A K G S A L M F N L Q E P Y F T W P L I A A D G G Y A F K Y E N G Y D I K D V G V D N<br>A G A K A G L T F L V D L I K N K H M N A D T D Y S I A E A A F N K G E T A M T I N G P W A W S N I D T S K V N Y<br>G V T V L P T F K G Q P S K P F V G V L S A G I N A A S P N K E L A K E F L E N Y L L T D E G L E A V N K D K P L<br>G A V A L K S Y E E E L A K D P R I A A T M E N A Q K G E I M P N I P Q M S A F W Y A V R T A V I N A A S G R Q T<br>V D E A L K D A Q T N S S S N N N N N N N N N L G E F L V P R G S W S H P Q F E K A G G H M G A A M A G Q E D P<br>V Q R E I H Q D W A N R E Y I E I I T S S I K K I A D F L N S F D M S C R S R L A T L N E K L T A L E R R I E Y I<br>E A R V T K G E T L T                                                                                                                                                                  | (Chen et al., 2014)   |
| GG-(MBP) <sub>2</sub>       | MKI-GGS-TEV-GG-2MBP-TEV, N-terminal and C-terminal regions removed after TEV cleavage | pDK256 | MKIGGSENLYFQGGGKTEEGKLV I W I N G D K G Y N G L A E V G K K F E K D T G I K V T V E H P D K<br>L E E K F P Q V A A T G D G P D I I F W A H D R F G G Y A Q S G L L A E I T P D K A F Q D K L Y P F T W D A V R Y<br>N G K L I A Y P I A V E A L S L I Y N K D L L P N P P K T W E E I P A L D K E L K A K G S A L M F N L Q E P Y F<br>T W P L I A A D G G Y A F K Y E N G Y D I K D V G V D N A G A K A G L T F L V D L I K N K H M N A D T D Y S I A<br>E A A F N K G E T A M T I N G P W A W S N I D T S K V N Y G V T V L P T F K G Q P S K P F V G V L S A G I N A A S<br>P N K E L A K E F L E N Y L L T D E G L E A V N K D K P L G A V A L K S Y E E E L A K D P R I A A T M E N A Q K G<br>E I M P N I P Q M S A F W Y A V R T A V I N A A S G R Q T V D E A L K D A Q T N S S S N G G S G G S G S K T E<br>E G K L V I W I N G D K G Y N G L A E V G K K F E K D T G I K V T V E H P D K L E E K F P Q V A A T G D G P D I I<br>F W A H D R F G G Y A Q S G L L A E I T P D K A F Q D K L Y P F T W D A V R Y N G K L I A Y P I A V E A L S L I Y<br>N K D L L P N P P K T W E E I P A L D K E L K A K G S A L M F N L Q E P Y F T W P L I A A D G G Y A F K Y E N G<br>Y D I K D V G V D N A G A K A G L T F L V D L I K N K H M N A D T D Y S I A E A A F N K G E T A M T I N G P W A<br>W S N I D T S K V N Y G V T V L P T F K G Q P S K P F V G V L S A G I N A A S P N K E L A K E F L E N Y L L T D E<br>G L E A V N K D K P L G A V A L K S Y E E E L A K D P R I A A T M E N A Q K G E I M P N I P Q M S A F W Y A V R T<br>A V I N A A S G R Q T V D E A L K D A Q T N S S S N N N N N N N N N L G I E G R I S E F E N L Y F Q G H M L E E                                                                                                                                                                                                                                                                                                                                  | This paper            |

|                    |                                  |        |                                                                                                                                                                                                          |                                                                             |
|--------------------|----------------------------------|--------|----------------------------------------------------------------------------------------------------------------------------------------------------------------------------------------------------------|-----------------------------------------------------------------------------|
|                    |                                  |        | FGSSRVDLQASLALAVVLQRRDWNENPGVTQLNRLAAHPPFASWRNSEEARTDRPSQQ<br>LRSLNGEWQLGCFGG                                                                                                                            |                                                                             |
| Sortase 5M         | Sortase 5M-<br>His6              | pDK085 | MQAKPQIPKDKSKVAGYIEIPDADIKEPVYPGPATREQLNRGVSFAEENESLDDQNI<br>SIAGHTFIDRPNYQFTNLKAAKKGSMVYFKVGNETRKYKMTSIRNVKPTAVEVLDEQ<br>K GKDKQLTLITCDDYNEETGVWETRKIFVATEVKLEHHHHHH                                    | <a href="https://www.addgene.org/75144/">https://www.addgene.org/75144/</a> |
| Rac1 <sup>QP</sup> | hRac1 <sup>Q61L/P29S</sup><br>Δ4 | pDK077 | MQAIKCVVVG DGAVGKTCLLISYTTNAFSGEYIPTVFDNYSANVMVDGKPVNLGLWD<br>TAGLEDYDRLRPLSYPTDVF LICFSLVSPASFENVRAKWYPEVRHHCPTPIILVG<br>TKL DLRDDKDTIEKLKEKKLTPITYPQGLAMAKEIGAVKYLECSALTQRGLKTVFDE<br>AIRAVLCPPPVKRRRK | This paper                                                                  |

1049

1050 **References**

- 1051 Adamczak, R., Porollo, A., Meller, J., 2004. Accurate prediction of solvent accessibility using  
1052 neural networks-based regression. *Proteins Struct. Funct. Genet.* 56, 753–767.  
1053 <https://doi.org/10.1002/prot.20176>
- 1054 Akin, O., Mullins, R.D., 2008. Capping Protein Increases the Rate of Actin-Based Motility by  
1055 Promoting Filament Nucleation by the Arp2/3 Complex. *Cell* 133, 841–851.  
1056 <https://doi.org/10.1016/j.cell.2008.04.011>
- 1057 Alekhina, O., Burstein, E., Billadeau, D.D., 2017. Cellular functions of WASP family proteins at  
1058 a glance. *J. Cell Sci.* 130, 2235–2241. <https://doi.org/10.1242/jcs.199570>
- 1059 Askelöf, P., Guthenberg, C., Jakobson, I., Mannervik, B., 1975. Purification and characterization  
1060 of two glutathione S-aryltransferase activities from rat liver. *Biochem. J.* 147, 513–522.  
1061 <https://doi.org/10.1042/bj1470513>
- 1062 Banaszynski, L.A., Liu, C.W., Wandless, T.J., 2005. Characterization of the  
1063 FKBP·Rapamycin·FRB Ternary Complex. *J. Am. Chem. Soc.* 127, 4715–4721.  
1064 <https://doi.org/10.1021/ja043277y>
- 1065 Baskakov, I. V, Kumar, R., Srinivasan, G., Ji, Y., Bolen, D.W., Thompson, E.B., 1999.  
1066 Trimethylamine N-Oxide-induced Cooperative Folding of an Intrinsically Unfolded  
1067 Transcription-activating Fragment of Human Glucocorticoid Receptor\*. *J. Biol. Chem.* 274,  
1068 10693–10696. <https://doi.org/https://doi.org/10.1074/jbc.274.16.10693>
- 1069 Begemann, A., Sticht, H., Begtrup, A., Vitobello, A., Faivre, L., Banka, S., Alhaddad, B.,  
1070 Asadollahi, R., Becker, J., Bierhals, T., Brown, K.E., Bruel, A.L., Brunet, T., Carneiro, M.,  
1071 Cremer, K., Day, R., Denommé-Pichon, A.S., Dymont, D.A., Engels, H., Fisher, R., Goh,  
1072 E.S., Hajianpour, M.J., Haertel, L.R.M., Hauer, N., Hempel, M., Herget, T., Johannsen, J.,  
1073 Kraus, C., Le Guyader, G., Lesca, G., Mau-Them, F.T., McDermott, J.H., McWalter, K.,  
1074 Meyer, P., Öunap, K., Popp, B., Reimand, T., Riedhammer, K.M., Russo, M., Sadleir, L.G.,  
1075 Saenz, M., Schiff, M., Schuler, E., Syrbe, S., Van der Ven, A.T., Verloes, A., Willems, M.,  
1076 Zweier, C., Steindl, K., Zweier, M., Rauch, A., 2021. New insights into the clinical and  
1077 molecular spectrum of the novel CYFIP2-related neurodevelopmental disorder and  
1078 impairment of the WRC-mediated actin dynamics. *Genet. Med.* 23, 543–554.  
1079 <https://doi.org/10.1038/s41436-020-01011-x>
- 1080 Bernhofer, M., Dallago, C., Karl, T., Satagopam, V., Heinzinger, M., Littmann, M., Olenyi, T.,

- 1081 Qiu, J., Schütze, K., Yachdav, G., Ashkenazy, H., Ben-Tal, N., Bromberg, Y., Goldberg, T.,  
1082 Kajan, L., O'Donoghue, S., Sander, C., Schafferhans, A., Schlessinger, A., Vriend, G.,  
1083 Mirdita, M., Gawron, P., Gu, W., Jarosz, Y., Trefois, C., Steinegger, M., Schneider, R.,  
1084 Rost, B., 2021. PredictProtein - Predicting protein structure and function for 29 years.  
1085 *Nucleic Acids Res.* 49, W535–W540. <https://doi.org/10.1093/nar/gkab354>
- 1086 Bonneau, R., Tsai, J., Ruczinski, I., Chivian, D., Rohl, C., Strauss, C.E., Baker, D., 2001. Rosetta  
1087 in CASP4: progress in ab initio protein structure prediction. *Proteins Suppl* 5, 119–126.  
1088 <https://doi.org/10.1002/prot.1170>
- 1089 Bürgi, J., Xue, B., Uversky, V.N., van der Goot, F.G., 2016. Intrinsic Disorder in  
1090 Transmembrane Proteins: Roles in Signaling and Topology Prediction. *PLoS One* 11,  
1091 e0158594–e0158594. <https://doi.org/10.1371/journal.pone.0158594>
- 1092 Burianek, L.E., Soderling, S.H., 2013. Under lock and key: Spatiotemporal regulation of WASP  
1093 family proteins coordinates separate dynamic cellular processes. *Semin. Cell Dev. Biol.* 24,  
1094 258–266. <https://doi.org/10.1016/j.semcdb.2012.12.005>
- 1095 Caldwell, J.E., Heiss, S.G., Mermall, V., Cooper, J.A., 1989. Effects of CapZ, an Actin Capping  
1096 Protein of Muscle, on the Polymerization of Actin. *Biochemistry* 28, 8506–8514.  
1097 <https://doi.org/10.1021/bi00447a036>
- 1098 Chaudhari, K., Gorla, M., Chang, C., Kania, A., Bashaw, G.J., 2021. Robo recruitment of the  
1099 wave regulatory complex plays an essential and conserved role in midline repulsion. *Elife*  
1100 10, 1–35. <https://doi.org/10.7554/ELIFE.64474>
- 1101 Chen, B., Brinkmann, K., Chen, Z., Pak, C.W., Liao, Y., Shi, S., Henry, L., Grishin, N. V.,  
1102 Bogdan, S., Rosen, M.K., 2014a. The WAVE regulatory complex links diverse receptors to  
1103 the actin cytoskeleton. *Cell* 156, 195–207. <https://doi.org/10.1016/j.cell.2013.11.048>
- 1104 Chen, B., Chou, H.-T., Brautigam, C.A., Xing, W., Yang, S., Henry, L., Doolittle, L.K., Walz,  
1105 T., Rosen, M.K., 2017. Rac1 GTPase activates the WAVE regulatory complex through two  
1106 distinct binding sites. *Elife* 6, 1–22. <https://doi.org/10.7554/elife.29795>
- 1107 Chen, B., Padrick, S.B., Henry, L., Rosen, M.K., 2014b. Biochemical reconstitution of the  
1108 WAVE regulatory complex. *Methods Enzymol.* 540, 55–72. <https://doi.org/10.1016/B978-0-12-397924-7.00004-2>
- 1109  
1110 Chen, I., Dorr, B.M., Liu, D.R., 2011. A general strategy for the evolution of bond-forming  
1111 enzymes using yeast display. *Proc. Natl. Acad. Sci. U. S. A.* 108, 11399–11404.

- 1112 <https://doi.org/10.1073/pnas.1101046108>
- 1113 Chen, Z., Borek, D., Padrick, S.B., Gomez, T.S., Metlagel, Z., Ismail, A.M., Umetani, J.,  
1114 Billadeau, D.D., Otwinowski, Z., Rosen, M.K., 2010. Structure and control of the actin  
1115 regulatory WAVE complex. *Nature* 468, 533–538. <https://doi.org/10.1038/nature09623>
- 1116 Cheng, P., Poo, M., 2012. Early events in axon/dendrite polarization. *Annu. Rev. Neurosci.* 35,  
1117 181–201. <https://doi.org/10.1146/annurev-neuro-061010-113618>
- 1118 Chia, P.H., Chen, B., Li, P., Rosen, M.K., Shen, K., 2014. Local F-actin network links synapse  
1119 formation and axon branching. *Cell* 156, 208–220.  
1120 <https://doi.org/10.1016/j.cell.2013.12.009>
- 1121 Chou, F.-S., Wang, P.-S., 2016. The Arp2/3 complex is essential at multiple stages of neural  
1122 development. *Neurogenesis* 3, e1261653. <https://doi.org/10.1080/23262133.2016.1261653>
- 1123 Conway, O.J., Carrasquillo, M.M., Wang, X., Bredenberg, J.M., Reddy, J.S., Strickland, S.L.,  
1124 Younkin, C.S., Burgess, J.D., Allen, M., Lincoln, S.J., Nguyen, T., Malphrus, K.G., Soto,  
1125 A.I., Walton, R.L., Boeve, B.F., Petersen, R.C., Lucas, J.A., Ferman, T.J., Cheshire, W.P.,  
1126 van Gerpen, J.A., Uitti, R.J., Wszolek, Z.K., Ross, O.A., Dickson, D.W., Graff-Radford,  
1127 N.R., Ertekin-Taner, N., 2018. ABI3 and PLCG2 missense variants as risk factors for  
1128 neurodegenerative diseases in Caucasians and African Americans. *Mol. Neurodegener.* 13,  
1129 1–12. <https://doi.org/10.1186/s13024-018-0289-x>
- 1130 Cooper, J.A., Pollard, T.D., 1985. Effects of Capping Protein on the Kinetics of Actin  
1131 Polymerization. *Biochemistry* 793–799.
- 1132 Cooper, J.A., Walker, S.B., Pollard, T.D., 1983. Pyrene actin: documentation of the validity of a  
1133 sensitive assay for actin polymerization. *J. Muscle Res. Cell Motil.* 4, 253–262.  
1134 <https://doi.org/10.1007/BF00712034>
- 1135 Dahl, J.P., Wang-Dunlop, J., Gonzales, C., Goad, M.E.P., Mark, R.J., Kwak, S.P., 2003.  
1136 Characterization of the WAVE1 knock-out mouse: Implications for CNS development. *J.*  
1137 *Neurosci.* 23, 3343–3352. <https://doi.org/10.1523/jneurosci.23-08-03343.2003>
- 1138 Ding, B., Yang, S., Schaks, M., Liu, Y., Brown, A., Rottner, K., Chowdhury, S., Chen, B., 2022.  
1139 Structures reveal a key mechanism of WAVE Regulatory Complex activation by Rac1  
1140 GTPase. *BioRxiv [Preprint]*, May 10. doi: 10.1101/2022.05.10.491380.
- 1141 Dishman, A.F., Volkman, B.F., 2018. Unfolding the Mysteries of Protein Metamorphosis. *ACS*  
1142 *Chem. Biol.* 13, 1438–1446. <https://doi.org/10.1021/acscchembio.8b00276>



- 1143 Dong, X., Liu, O.W., Howell, A.S., Shen, K., 2013. An extracellular adhesion molecule complex  
1144 patterns dendritic branching and morphogenesis. *Cell* 155, 296.  
1145 <https://doi.org/10.1016/j.cell.2013.08.059>
- 1146 Doolittle, L.K., Rosen, M.K., Padrick, S.B., 2013a. Measurement and analysis of in vitro actin  
1147 polymerization. *Methods Mol. Biol.* 1046, 273–293. [https://doi.org/10.1007/978-1-62703-](https://doi.org/10.1007/978-1-62703-538-5_16)  
1148 [538-5\\_16](https://doi.org/10.1007/978-1-62703-538-5_16)
- 1149 Doolittle, L.K., Rosen, M.K., Padrick, S.B., 2013b. Purification of native Arp2/3 complex from  
1150 bovine thymus. *Methods Mol. Biol.* 1046, 231–250. [https://doi.org/10.1007/978-1-62703-](https://doi.org/10.1007/978-1-62703-538-5_14)  
1151 [538-5\\_14](https://doi.org/10.1007/978-1-62703-538-5_14)
- 1152 Drozdetskiy, A., Cole, C., Procter, J., Barton, G.J., 2015. JPred4: a protein secondary structure  
1153 prediction server. *Nucleic Acids Res.* 43, W389–W394. <https://doi.org/10.1093/nar/gkv332>
- 1154 Dyson, H.J., Wright, P.E., 2002. Coupling of folding and binding for unstructured proteins. *Curr.*  
1155 *Opin. Struct. Biol.* 12, 54–60. [https://doi.org/10.1016/S0959-440X\(02\)00289-0](https://doi.org/10.1016/S0959-440X(02)00289-0)
- 1156 Eden, S., Rohatgi, R., Podtelejnikov, A. V., Mann, M., Kirschner, M.W., 2002. Mechanism of  
1157 regulation of WAVE1-induced actin nucleation by Rac1 and Nck. *Nature* 418, 790–793.  
1158 <https://doi.org/10.1038/nature00859>
- 1159 Evans, R., O'Neill, M., Pritzel, A., Antropova, N., Senior, A., Green, T., Židek, A., Bates, R.,  
1160 Blackwell, S., Yim, J., Ronneberger, O., Bodenstein, S., Zielinski, M., Bridgland, A.,  
1161 Potapenko, A., Cowie, A., Tunyasuvunakool, K., Jain, R., Clancy, E., Kohli, P., Jumper, J.,  
1162 Hassabis, D., 2022. Protein complex prediction with AlphaFold-Multimer. *bioRxiv*  
1163 2021.10.04.463034. <https://doi.org/10.1101/2021.10.04.463034>
- 1164 Fan, L., Lu, Y., Shen, X., Shao, H., Suo, L., Wu, Q., 2018. Alpha protocadherins and Pyk2  
1165 kinase regulate cortical neuron migration and cytoskeletal dynamics via rac1 GTPase and  
1166 WAVE complex in mice. *Elife* 7, 1–26. <https://doi.org/10.7554/eLife.35242>
- 1167 Funk, J., Merino, F., Schaks, M., Rottner, K., Raunser, S., Bieling, P., 2021. A barbed end  
1168 interference mechanism reveals how capping protein promotes nucleation in branched actin  
1169 networks. *Nat. Commun.* 12. <https://doi.org/10.1038/s41467-021-25682-5>
- 1170 Gautreau, A., Ho, H.-y. H., Li, J., Steen, H., Gygi, S.P., Kirschner, M.W., 2004. Purification and  
1171 architecture of the ubiquitous Wave complex. *Proc. Natl. Acad. Sci.* 101, 4379–4383.  
1172 <https://doi.org/10.1073/pnas.0400628101>
- 1173 Goley, E.D., Welch, M.D., 2006. The ARP2/3 complex: An actin nucleator comes of age. *Nat.*

- 1174 Rev. Mol. Cell Biol. 7, 713–726. <https://doi.org/10.1038/nrm2026>
- 1175 Greenfield, N.J., 2006. Using circular dichroism spectra to estimate protein secondary structure.
- 1176 Nat. Protoc. 1, 2876–2890. <https://doi.org/10.1038/nprot.2006.202>
- 1177 Hansen, S.D., Zuchero, J.B., Mullins, R.D., 2013. Cytoplasmic Actin: Purification and Single
- 1178 Molecule Assembly Assays BT - Adhesion Protein Protocols, in: Coutts, A.S. (Ed.), .
- 1179 Humana Press, Totowa, NJ, pp. 145–170. [https://doi.org/10.1007/978-1-62703-538-5\\_9](https://doi.org/10.1007/978-1-62703-538-5_9)
- 1180 Heier, J.A., Dickinson, D.J., Kwiatkowski, A. V, 2017. Measuring Protein Binding to F-actin by
- 1181 Co-sedimentation. J. Vis. Exp. 55613. <https://doi.org/10.3791/55613>
- 1182 Heiss, S.G., Cooper, J.A., 1991. Regulation of CapZ, an Actin Capping Protein of Chicken
- 1183 Muscle, by Anionic Phospholipids. Biochemistry 30, 8753–8758.
- 1184 <https://doi.org/10.1021/bi00100a006>
- 1185 Hotulainen, P., Hoogenraad, C.C., 2010. Actin in dendritic spines: Connecting dynamics to
- 1186 function. J. Cell Biol. 189, 619–629. <https://doi.org/10.1083/jcb.201003008>
- 1187 Huber, A.H., Stewart, D.B., Laurents, D. V, Nelson, W.J., Weis, W.I., 2001. The cadherin
- 1188 cytoplasmic domain is unstructured in the absence of beta-catenin. A possible mechanism
- 1189 for regulating cadherin turnover. J. Biol. Chem. 276, 12301–12309.
- 1190 <https://doi.org/10.1074/jbc.M010377200>
- 1191 Huber, A.H., Weis, W.I., 2001. The structure of the beta-catenin/E-cadherin complex and the
- 1192 molecular basis of diverse ligand recognition by beta-catenin. Cell 105, 391–402.
- 1193 [https://doi.org/10.1016/s0092-8674\(01\)00330-0](https://doi.org/10.1016/s0092-8674(01)00330-0)
- 1194 Huxley, H.E., Brown, W., 1967. The low-angle X-ray diagram of vertebrate striated muscle and
- 1195 its behaviour during contraction and rigor. J. Mol. Biol. 30, 383–434.
- 1196 [https://doi.org/10.1016/S0022-2836\(67\)80046-9](https://doi.org/10.1016/S0022-2836(67)80046-9)
- 1197 Ito, Y., Carss, K.J., Duarte, S.T., Hartley, T., Keren, B., Kurian, M.A., Marey, I., Charles, P.,
- 1198 Mendonça, C., Nava, C., Pfundt, R., Sanchis-Juan, A., van Bokhoven, H., van Essen, A.,
- 1199 van Ravenswaaij-Arts, C., Aitman, T., Bennett, D., Caulfield, M., Chinnery, P., Gale, D.,
- 1200 Koziell, A., Kuijpers, T.W., Laffan, M.A., Maher, E., Markus, H.S., Morrell, N.W.,
- 1201 Ouwehand, W.H., Perry, D.J., Raymond, F.L., Roberts, I., Smith, K.G.C., Thrasher, A.,
- 1202 Watkins, H., Williamson, C., Woods, G., Ashford, S., Bradley, J.R., Fletcher, D.,
- 1203 Hammerton, T., James, R., Kingston, N., Penkett, C.J., Stirrups, K., Veltman, M., Young,
- 1204 T., Brown, M., Clements-Brod, N., Davis, J., Dewhurst, E., Dolling, H., Erwood, M., Fray,

1205 A., Linger, R., Martin, J.M., Papadia, S., Rehnstrom, K., Stark, H., Allsup, D., Austin, S.,  
1206 Bakchoul, T., Bariana, T.K., Bolton-Maggs, P., Chalmers, E., Collins, J., Collins, P., Erber,  
1207 W.N., Everington, T., Favier, R., Freson, K., Furie, B., Gattens, M., Gebhart, J., Gomez, K.,  
1208 Greene, D., Greinacher, A., Gresele, P., Hart, D., Heemskerk, J.W.M., Henskens, Y.,  
1209 Kazmi, R., Keeling, D., Kelly, A.M., Lambert, M.P., Lentaigne, C., Liesner, R., Makris, M.,  
1210 Mangles, S., Mathias, M., Millar, C.M., Mumford, A., Nurden, P., Payne, J., Pasi, J.,  
1211 Peerlinck, K., Revel-Vilk, S., Richards, M., Rondina, M., Roughley, C., Schulman, S.,  
1212 Schulze, H., Scully, M., Sivapalaratnam, S., Stubbs, M., Tait, R.C., Talks, K., Thachil, J.,  
1213 Toh, C.H., Turro, E., Van Geet, C., De Vries, M., Warner, T.Q., Watson, H., Westbury, S.,  
1214 Furnell, A., Mapeta, R., Rayner-Matthews, P., Simeoni, I., Staines, S., Stephens, J., Watt,  
1215 C., Whitehorn, D., Attwood, A., Daugherty, L., Deevi, S.V.V., Halmagyi, C., Hu, F.,  
1216 Matser, V., Meacham, S., Megy, K., Shamardina, O., Titterton, C., Tuna, S., Yu, P., von  
1217 Ziegenweldt, J., Astle, W., Bleda, M., Carss, K.J., Gräf, S., Haimel, M., Lango-Allen, H.,  
1218 Richardson, S., Calleja, P., Rankin, S., Turek, W., Anderson, J., Bryson, C., Carmichael, J.,  
1219 McJannet, C., Stock, S., Allen, L., Ambegaonkar, G., Armstrong, R., Arno, G., Bitner-  
1220 Glindzicz, M., Brady, A., Canham, N., Chitre, M., Clement, E., Clowes, V., Deegan, P.,  
1221 Deshpande, C., Doffinger, R., Firth, H., Flinter, F., French, C., Gardham, A., Ghali, N.,  
1222 Gissen, P., Grozeva, D., Henderson, R., Hensiek, A., Holden, S., Holder, M., Holder, S.,  
1223 Hurst, J., Josifova, D., Krishnakumar, D., Kurian, M.A., Lees, M., MacLaren, R., Maw, A.,  
1224 Mehta, S., Michaelides, M., Moore, A., Murphy, E., Park, S.M., Parker, A., Patch, C.,  
1225 Paterson, J., Rankin, J., Reid, E., Rosser, E., Sanchis-Juan, A., Sandford, R., Santra, S.,  
1226 Scott, R., Sohal, A., Stein, P., Thomas, E., Thompson, D., Tischkowitz, M., Vogt, J.,  
1227 Wakeling, E., Wassmer, E., Webster, A., Ali, Sonia, Ali, Souad, Boggard, H.J., Church, C.,  
1228 Coghlan, G., Cookson, V., Corris, P.A., Creaser-Myers, A., DaCosta, R., Dormand, N.,  
1229 Eyries, M., Gall, H., Ghataorhe, P.K., Ghio, S., Ghofrani, A., Gibbs, J.S.R., Girerd, B.,  
1230 Greenhalgh, A., Hadinnapola, C., Houweling, A.C., Humbert, M., in't Veld, A.H.,  
1231 Kennedy, F., Kiely, D.G., Kovacs, G., Lawrie, A., Ross, R.V.M., Machado, R., Masati, L.,  
1232 Meehan, S., Moledina, S., Montani, D., Othman, S., Peacock, A.J., Pepke-Zaba, J., Pollock,  
1233 V., Polwarth, G., Ranganathan, L., Rhodes, C.J., Rue-Albrecht, K., Schotte, G., Shipley, D.,  
1234 Soubrier, F., Southgate, L., Scelsi, L., Suntharalingam, J., Tan, Y., Toshner, M., Treacy,  
1235 C.M., Trembath, R., Noordegraaf, A.V., Walker, Sara, Wanjiku, I., Wharton, J., Wilkins,

1236 M., Wort, S.J., Yates, K., Alachkar, H., Antrobus, R., Arumugakani, G., Bacchelli, C.,  
1237 Baxendale, H., Bethune, C., Bibi, S., Booth, C., Browning, M., Burns, S., Chandra, A.,  
1238 Cooper, N., Davies, S., Devlin, L., Drewe, E., Edgar, D., Egner, W., Ghurye, R., Gilmour,  
1239 K., Goddard, S., Gordins, P., Grigoriadou, S., Hackett, S., Hague, R., Harper, L., Hayman,  
1240 G., Herwadkar, A., Huissoon, A., Jolles, S., Kelleher, P., Kumararatne, D., Lear, S.,  
1241 Longhurst, H., Lorenzo, L., Maimaris, J., Manson, A., McDermott, E., Murng, S.,  
1242 Nejentsev, S., Noorani, S., Oksenhendler, E., Ponsford, M., Qasim, W., Quinti, I., Richter,  
1243 A., Samarghitean, C., Sargur, R., Savic, S., Seneviratne, S., Sewell, C., Staples, E., Stauss,  
1244 H., Thaventhiran, J., Thomas, M., Welch, S., Willcocks, L., Yeatman, N., Yong, P., Ancliff,  
1245 P., Babbs, C., Layton, M., Louka, E., McGowan, S., Mead, A., Roy, N., Chambers, J.,  
1246 Dixon, P., Estiu, C., Hague, B., Marschall, H.U., Simpson, M., Chong, S., Emmerson, I.,  
1247 Ginsberg, L., Gosal, D., Hadden, R., Horvath, R., Mahdi-Rogers, M., Manzur, A., Marshall,  
1248 A., Matthews, E., McCarthy, M., Reilly, M., Renton, T., Rice, A., Themistocleous, A.,  
1249 Vale, T., Van Zuydam, N., Walker, Suellen, Ormondroyd, L., Hudson, G., Wei, W., Yu  
1250 Wai Man, P., Whitworth, J., Afzal, M., Colby, E., Saleem, M., Alavijeh, O.S., Cook, H.T.,  
1251 Johnson, S., Levine, A.P., Wong, E.K.S., Tan, R., Boycott, K.M., MacKenzie, A.,  
1252 Majewski, J., Brudno, M., Bulman, D., Dymont, D., Boycott, K.M., Kernohan, K.D.,  
1253 Dyack, S., Raymond, F.L., 2018. De Novo Truncating Mutations in WASF1 Cause  
1254 Intellectual Disability with Seizures. *Am. J. Hum. Genet.* 103, 144–153.  
1255 <https://doi.org/10.1016/j.ajhg.2018.06.001>  
1256 Jan, Y.-N., Jan, L.Y., 2003. The Control of Dendrite Development. *Neuron* 40, 229–242.  
1257 [https://doi.org/https://doi.org/10.1016/S0896-6273\(03\)00631-7](https://doi.org/https://doi.org/10.1016/S0896-6273(03)00631-7)  
1258 Johannes, L., Pezeshkian, W., Ipsen, J.H., Shillcock, J.C., 2018. Clustering on Membranes:  
1259 Fluctuations and More. *Trends Cell Biol.* 28, 405–415.  
1260 <https://doi.org/10.1016/j.tcb.2018.01.009>  
1261 Jumper, J., Evans, R., Pritzel, A., Green, T., Figurnov, M., Ronneberger, O., Tunyasuvunakool,  
1262 K., Bates, R., Žídek, A., Potapenko, A., Bridgland, A., Meyer, C., Kohl, S.A.A., Ballard,  
1263 A.J., Cowie, A., Romera-Paredes, B., Nikolov, S., Jain, R., Adler, J., Back, T., Petersen, S.,  
1264 Reiman, D., Clancy, E., Zielinski, M., Steinegger, M., Pacholska, M., Berghammer, T.,  
1265 Bodenstein, S., Silver, D., Vinyals, O., Senior, A.W., Kavukcuoglu, K., Kohli, P., Hassabis,  
1266 D., 2021. Highly accurate protein structure prediction with AlphaFold. *Nature* 596, 583–

- 1267 589. <https://doi.org/10.1038/s41586-021-03819-2>
- 1268 Källberg, M., Wang, H., Wang, S., Peng, J., Wang, Z., Lu, H., Xu, J., 2012. Template-based  
1269 protein structure modeling using the RaptorX web server. *Nat. Protoc.* 7, 1511–1522.  
1270 <https://doi.org/10.1038/nprot.2012.085>
- 1271 Kirkpatrick, S.L., Goldberg, L.R., Yazdani, N., Babbs, R.K., Wu, J., Reed, E.R., Jenkins, D.F.,  
1272 Bolgioni, A.F., Landaverde, K.I., Luttki, K.P., Mitchell, K.S., Kumar, V., Johnson, W.E.,  
1273 Mulligan, M.K., Cottone, P., Bryant, C.D., 2017. Cytoplasmic FMR1-Interacting Protein 2  
1274 Is a Major Genetic Factor Underlying Binge Eating. *Biol. Psychiatry* 81, 757–769.  
1275 <https://doi.org/10.1016/j.biopsych.2016.10.021>
- 1276 Kobayashi, K., Kuroda, S., Fukata, M., Nakamura, T., Nagase, T., Nomura, N., Matsuura, Y.,  
1277 Yoshida-Kubomura, N., Iwamatsu, A., Kaibuchi, K., 1998. p140Sra-1 (specifically Rac1-  
1278 associated protein) is a novel specific target for Rac1 small GTPase. *J. Biol. Chem.* 273,  
1279 291–295. <https://doi.org/10.1074/jbc.273.1.291>
- 1280 Koronakis, V., Hume, P.J., Humphreys, D., Liu, T., Horning, O., Jensen, O.N., McGhie, E.J.,  
1281 2011. WAVE regulatory complex activation by cooperating GTPases Arf and Rac1. *Proc.*  
1282 *Natl. Acad. Sci.* 108, 14449–14454. <https://doi.org/10.1073/pnas.1107666108>
- 1283 Kouyama, T., Mihashi, K., 1981. Fluorimetry study of N-(1-pyrenyl)iodoacetamide-labelled F-  
1284 actin. Local structural change of actin protomer both on polymerization and on binding of  
1285 heavy meromyosin. *Eur. J. Biochem.* 114, 33–38.
- 1286 Kramer, D.A., Piper, H.K., Chen, B., 2022. WASP family proteins : Molecular mechanisms and  
1287 implications in human disease. *Eur. J. Cell Biol.* 101.  
1288 <https://doi.org/10.1016/j.ejcb.2022.151244>
- 1289 Kuhn, J.R., Pollard, T.D., 2005. Real-time measurements of actin filament polymerization by  
1290 total internal reflection fluorescence microscopy. *Biophys. J.* 88, 1387–1402.  
1291 <https://doi.org/10.1529/biophysj.104.047399>
- 1292 Kumar, V., Kim, K., Joseph, C., Kourrich, S., Yoo, S.-H., Huang, H.C., Vitaterna, M.H., de  
1293 Villena, F.P.-M., Churchill, G., Bonci, A., Takahashi, J.S., 2013. C57BL/6N Mutation in  
1294 Cytoplasmic FMRP interacting protein 2 Regulates Cocaine Response. *Science (80-. )*. 342,  
1295 1508–1512.
- 1296 Kuzmic, P., 1996. Program DYNAFIT for the analysis of enzyme kinetic data: application to  
1297 HIV proteinase. *Anal. Biochem.* 237, 260–273. <https://doi.org/10.1006/abio.1996.0238>



- 1298 Lebensohn, A.M., Kirschner, M.W., 2009. Activation of the WAVE Complex by Coincident  
1299 Signals Controls Actin Assembly. *Mol. Cell* 36, 512–524.  
1300 <https://doi.org/10.1016/j.molcel.2009.10.024>
- 1301 Lee, N.K., Fok, K.W., White, A., Wilson, N.H., O’Leary, C.J., Cox, H.L., Michael, M., Yap,  
1302 A.S., Cooper, H.M., 2016. Neogenin recruitment of the WAVE regulatory complex  
1303 maintains adherens junction stability and tension. *Nat. Commun.* 7.  
1304 <https://doi.org/10.1038/ncomms11082>
- 1305 Lefebvre, J.L., Sanes, J.R., Kay, J.N., 2015. Development of Dendritic Form and Function.  
1306 *Annu. Rev. Cell Dev. Biol.* 31, 741–777. [https://doi.org/10.1146/annurev-cellbio-100913-](https://doi.org/10.1146/annurev-cellbio-100913-013020)  
1307 [013020](https://doi.org/10.1146/annurev-cellbio-100913-013020)
- 1308 Machesky, L.M., Atkinson, S.J., Ampe, C., Vandekerckhove, J., Pollard, T.D., Vandekerckhove,  
1309 J., 1994. Purification of a cortical complex containing two unconventional actins from  
1310 *Acanthamoeba* by affinity chromatography on profilin-agarose. *J. Cell Biol.* 127, 107–115.  
1311 <https://doi.org/10.1083/jcb.127.1.107>
- 1312 Machesky, L.M., Insall, R.H., 1998. Scar1 and the related Wiskott-Aldrich syndrome protein,  
1313 WASP, regulate the actin cytoskeleton through the Arp2/3 complex. *Curr. Biol.* 8, 1347–  
1314 1356. [https://doi.org/10.1016/S0960-9822\(98\)00015-3](https://doi.org/10.1016/S0960-9822(98)00015-3)
- 1315 McGuffin, L.J., Bryson, K., Jones, D.T., 2000. The PSIPRED protein structure prediction server  
1316 . *Bioinformatics* 16, 404–405. <https://doi.org/10.1093/bioinformatics/16.4.404>
- 1317 Minkyung, B., Frank, D., Ivan, A., Justas, D., Sergey, O., Rie, L.G., Jue, W., Qian, C., N., K.L.,  
1318 Dustin, S.R., Claudia, M., Hahnbeom, P., Carson, A., R., G.C., Andy, D., H., P.J., V., R.A.,  
1319 A., van D.A., C., E.A., J., O.D., Theo, S., Christoph, B., Tea, P.-K., K., R.M., Udit, D., K.,  
1320 Y.C., E., B.J., Christopher, G.K., V., G.N., D., A.P., J., R.R., David, B., 2021. Accurate  
1321 prediction of protein structures and interactions using a three-track neural network. *Science*  
1322 (80-. ). 373, 871–876. <https://doi.org/10.1126/science.abj8754>
- 1323 Miyoshi, T., Tsuji, T., Higashida, C., Hertzog, M., Fujita, A., Narumiya, S., Scita, G., Watanabe,  
1324 N., 2006. Actin turnover-dependent fast dissociation of capping protein in the dendritic  
1325 nucleation actin network: Evidence of frequent filament severing. *J. Cell Biol.* 175, 947–  
1326 955. <https://doi.org/10.1083/jcb.200604176>
- 1327 Narvaez-Ortiz, H.Y., Nolen, B.J., 2022. Unconcerted conformational changes in Arp2/3 complex  
1328 integrate multiple activating signals to assemble functional actin networks. *Curr. Biol.* 32,

- 1329 975-987.e6. <https://doi.org/10.1016/j.cub.2022.01.004>
- 1330 Olive, C., Ibanez, L., Farias, F.H.G., Wang, F., John, P., Norton, J.B., Gentsch, J., Morris, J.C.,  
1331 Li, Z., Del-aguila, J., Bergmann, K., Bradley, J., Benitez, B.A., Harari, O., Fagan, A.,  
1332 Ances, B., Cruchaga, C., Victoria, M., 2020. Examination of the Effect of Rare Variants in  
1333 TREM2, ABI3, and PLCG2 in LOAD Through Multiple Phenotypes. *J. Alzheimers Dis.* 77,  
1334 1469–1482. <https://doi.org/10.3233/JAD-200019>. Examination
- 1335 Pilpel, Y., Segal, M., 2005. Rapid WAVE dynamics in dendritic spines of cultured hippocampal  
1336 neurons is mediated by actin polymerization. *J. Neurochem.* 95, 1401–1410.  
1337 <https://doi.org/10.1111/j.1471-4159.2005.03467.x>
- 1338 Polesskaya, A., Boutillon, A., Yang, S., Wang, Y., Romero, S., Liu, Y., Lavielle, M., Vacher, S.,  
1339 Schnitzler, A., Molinie, N., Rocques, N., Fokin, A., Guérois, R., Bièche, I., Chen, B.,  
1340 David, N.B., Gautreau, A.M., 2021. CYFIP2-containing WAVE complexes inhibit cell  
1341 migration by a competition mechanism. *bioRxiv* 2020.07.02.184655.
- 1342 Pollard, T.D., 2010. A Guide to Simple and Informative Binding Assays. *Mol. Biol. Cell* 21,  
1343 4061–4067. <https://doi.org/10.1091/mbc.e10-08-0683>
- 1344 Pollard, T.D., 2007. Regulation of Actin Filament Assembly by Arp2/3 Complex and Formins.  
1345 *Annu. Rev. Biophys. Biomol. Struct.* 36, 451–477.  
1346 <https://doi.org/10.1146/annurev.biophys.35.040405.101936>
- 1347 Pollitt, A.Y., Insall, R.H., 2009. WASP and SCAR/WAVE proteins: the drivers of actin  
1348 assembly. *J. Cell Sci.* 122, 2575–2578. <https://doi.org/10.1242/jcs.023879>
- 1349 Racz, B., Weinberg, R.J., 2008. Organization of the Arp2/3 Complex in Hippocampal Spines. *J.*  
1350 *Neurosci.* 28, 5654–5659. <https://doi.org/10.1523/jneurosci.0756-08.2008>
- 1351 Rottner, K., Stradal, T.E.B., Chen, B., 2021. WAVE regulatory complex. *Curr. Biol.* 31, R512–  
1352 R517. <https://doi.org/10.1016/j.cub.2021.01.086>
- 1353 Scott, E.K., Luo, L., 2001. How do dendrites take their shape? *Nat. Neurosci.* 4, 359–365.  
1354 <https://doi.org/10.1038/86006>
- 1355 Shi, R., Kramer, D.A., Chen, B., Shen, K., 2021. A two-step actin polymerization mechanism  
1356 drives dendrite branching. *Neural Dev.* 16, 1–16. [https://doi.org/10.1186/s13064-021-](https://doi.org/10.1186/s13064-021-00154-0)  
1357 [00154-0](https://doi.org/10.1186/s13064-021-00154-0)
- 1358 Shimojima Yamamoto, K., Yanagishita, T., Yamamoto, H., Miyamoto, Y., Nagata, M., Ishihara,  
1359 Y., Miyashita, Y., Asano, Y., Sakata, Y., Yamamoto, T., 2021. Recurrent de novo

1360 pathogenic variant of WASF1 in a Japanese patient with neurodevelopmental disorder with  
1361 absent language and variable seizures. *Hum. Genome Var.* 8, 7–9.  
1362 <https://doi.org/10.1038/s41439-021-00176-4>  
1363 Sims, R., Van Der Lee, S.J., Naj, A.C., Bellenguez, C., Badarinarayan, N., Jakobsdottir, J.,  
1364 Kunkle, B.W., Boland, A., Raybould, R., Bis, J.C., Martin, E.R., Grenier-Boley, B.,  
1365 Heilmann-Heimbach, S., Chouraki, V., Kuzma, A.B., Slegers, K., Vronskaya, M., Ruiz,  
1366 A., Graham, R.R., Olaso, R., Hoffmann, P., Grove, M.L., Vardarajan, B.N., Hiltunen, M.,  
1367 Nöthen, M.M., White, C.C., Hamilton-Nelson, K.L., Epelbaum, J., Maier, W., Choi, S.H.,  
1368 Beecham, G.W., Dulary, C., Herms, S., Smith, A.G.A. V., Funk, C.C., Derbois, C.,  
1369 Forstner, A.J., Ahmad, S., Li, H., Bacq, D., Harold, D., Satizabal, C.L., Valladares, O.,  
1370 Squassina, A., Thomas, R., Brody, J.A., Qu, L., Sánchez-Juan, P., Morgan, T., Wolters, F.J.,  
1371 Zhao, Y., Garcia, F.S., Denning, N., Fornage, M., Malamon, J., Naranjo, M.C.D., Majounie,  
1372 E., Mosley, T.H., Dombroski, B., Wallon, D., Lupton, M.K., Dupuis, J., Whitehead, P.,  
1373 Fratiglioni, L., Medway, C., Jian, X., Mukherjee, S., Keller, L., Brown, K., Lin, H.,  
1374 Cantwell, L.B., Panza, F., McGuinness, B., Moreno-Grau, S., Burgess, J.D., Solfrizzi, V.,  
1375 Proitsi, P., Adams, H.H., Allen, M., Seripa, D., Pastor, P., Cupples, L.A., Price, N.D.,  
1376 Hannequin, D., Frank-García, A., Levy, D., Chakrabarty, P., Caffarra, P., Giegling, I.,  
1377 Beiser, A.S., Giedraitis, V., Hampel, H., Garcia, M.E., Wang, X., Lannfelt, L., Mecocci, P.,  
1378 Eiriksdottir, G., Crane, P.K., Pasquier, F., Boccardi, V., Henández, I., Barber, R.C., Scherer,  
1379 M., Tarraga, L., Adams, P.M., Leber, M., Chen, Y., Albert, M.S., Riedel-Heller, S.,  
1380 Emilsson, V., Beekly, D., Braae, A., Schmidt, R., Blacker, D., Masullo, C., Schmidt, H.,  
1381 Doody, R.S., Spalletta, G., Jr, W.T.L., Fairchild, T.J., Bossù, P., Lopez, O.L., Frosch, M.P.,  
1382 Sacchinelli, E., Ghetti, B., Yang, Q., Huebinger, R.M., Jessen, F., Li, S., Kamboh, M.I.,  
1383 Morris, J.C., Sotolongo-Grau, O., Katz, M.J., Corcoran, C., Dunstan, M., Braddel, A.,  
1384 Thomas, C., Meggy, A., Marshall, R., Gerrish, A., Chapman, J., Aguilar, M., Taylor, S.,  
1385 Hill, M., Fairén, M.D., Hodges, A., Vellas, B., Soininen, H., Kloszewska, I., Daniilidou, M.,  
1386 Uphill, J., Patel, Y., Hughes, J.T., Lord, J., Turton, J., Hartmann, A.M., Cecchetti, R.,  
1387 Fenoglio, C., Serpente, M., Arcaro, M., Caltagirone, C., Orfei, M.D., Ciarabella, A.,  
1388 Pichler, S., Mayhaus, M., Gu, W., Lleó, A., Fortea, J., Blesa, R., Barber, I.S., Brookes, K.,  
1389 Cupidi, C., Maletta, R.G., Carrell, D., Sorbi, S., Moebus, S., Urbano, M., Pilotto, A.,  
1390 Kornhuber, J., Bosco, P., Todd, S., Craig, D., Johnston, J., Gill, M., Lawlor, B., Lynch, A.,

1391 Fox, N.C., Hardy, J., Albin, R.L., Apostolova, L.G., Arnold, S.E., Asthana, S., Atwood,  
1392 C.S., Baldwin, C.T., Barnes, L.L., Barral, S., Beach, T.G., Becker, J.T., Bigio, E.H., Bird,  
1393 T.D., Boeve, B.F., Bowen, J.D., Boxer, A., Burke, J.R., Burns, J.M., Buxbaum, J.D., Cairns,  
1394 N.J., Cao, C., Carlson, C.S., Carlsson, C.M., Carney, R.M., Carrasquillo, M.M., Carroll,  
1395 S.L., Diaz, C.C., Chui, H.C., Clark, D.G., Cribbs, D.H., Crocco, E.A., Decarli, C., Dick, M.,  
1396 Duara, R., Evans, D.A., Faber, K.M., Fallon, K.B., Fardo, D.W., Farlow, M.R., Ferris, S.,  
1397 Foroud, T.M., Galasko, D.R., Gearing, M., Geschwind, D.H., Gilbert, J.R., Graff-Radford,  
1398 N.R., Green, R.C., Growdon, J.H., Hamilton, R.L., Harrell, L.E., Honig, L.S., Huentelman,  
1399 M.J., Hulette, C.M., Hyman, B.T., Jarvik, G.P., Abner, E., Jin, L.W., Jun, G., Karydas, A.,  
1400 Kaye, J.A., Kim, R., Kowall, N.W., Kramer, J.H., Laferla, F.M., Lah, J.J., Leverenz, J.B.,  
1401 Levey, A.I., Li, G., Lieberman, A.P., Lunetta, K.L., Lyketsos, C.G., Marson, D.C.,  
1402 Martiniuk, F., Mash, D.C., Masliah, E., McCormick, W.C., McCurry, S.M., McDavid,  
1403 A.N., McKee, A.C., Mesulam, M., Miller, B.L., Miller, C.A., Miller, J.W., Murrell, J.R.,  
1404 Myers, A.J., O'Bryant, S., Olichney, J.M., Pankratz, V.S., Parisi, J.E., Paulson, H.L., Perry,  
1405 W., Peskind, E., Pierce, A., Poon, W.W., Potter, H., Quinn, J.F., Raj, A., Raskind, M.,  
1406 Reisberg, B., Reitz, C., Ringman, J.M., Roberson, E.D., Rogaeva, E., Rosen, H.J.,  
1407 Rosenberg, R.N., Sager, M.A., Saykin, A.J., Schneider, J.A., Schneider, L.S., Seeley,  
1408 W.W., Smith, A.G.A. V., Sonnen, J.A., Spina, S., Stern, R.A., Swerdlow, R.H., Tanzi, R.E.,  
1409 Thornton-Wells, T.A., Trojanowski, J.Q., Troncoso, J.C., Van Deerlin, V.M., Van Eldik,  
1410 L.J., Vinters, H. V., Vonsattel, J.P., Weintraub, S., Welsh-Bohmer, K.A., Wilhelmsen, K.C.,  
1411 Williamson, J., Wingo, T.S., Woltjer, R.L., Wright, C.B., Yu, C.E., Yu, L., Garzia, F.,  
1412 Golamaully, F., Septier, G., Engelborghs, S., Vandenberghe, R., De Deyn, P.P., Fernandez,  
1413 C.M., Benito, Y.A., Thonberg, H., Forsell, C., Lilius, L., Kinhult-Stählbom, A., Kilander,  
1414 L., Brundin, R., Concari, L., Helisalimi, S., Koivisto, A.M., Haapasalo, A., Dermecourt, V.,  
1415 Fievet, N., Hanon, O., Dufouil, C., Brice, A., Ritchie, K., Dubois, B., Himali, J.J., Keene,  
1416 C.D., Tschanz, J., Fitzpatrick, A.L., Kukull, W.A., Norton, M., Aspelund, T., Larson, E.B.,  
1417 Munger, R., Rotter, J.I., Lipton, R.B., Bullido, M.J., Hofman, A., Montine, T.J., Coto, E.,  
1418 Boerwinkle, E., Petersen, R.C., Alvarez, V., Rivadeneira, F., Reiman, E.M., Gallo, M.,  
1419 O'Donnell, C.J., Reisch, J.S., Bruni, A.C., Royall, D.R., Dichgans, M., Sano, M.,  
1420 Galimberti, D., St George-Hyslop, P., Scarpini, E., Tsuang, D.W., Mancuso, M.,  
1421 Bonuccelli, U., Winslow, A.R., Daniele, A., Wu, C.K., Peters, O., Nacmias, B.,

- 1422 Riemenschneider, M., Heun, R., Brayne, C., Rubinsztein, D.C., Bras, J., Guerreiro, R., Al-  
1423 Chalabi, A., Shaw, C.E., Collinge, J., Tsolaki, M., Clarimón, J., Sussams, R., Lovestone, S.,  
1424 O'Donovan, M.C., Owen, M.J., Behrens, T.W., Mead, S., Uitterlinden, A.G., Holmes, C.,  
1425 Cruchaga, C., Ingelsson, M., Bennett, D.A., Powell, J., Golde, T.E., Graff, C., De Jager,  
1426 P.L., Morgan, K., Ertekin-Taner, N., Combarros, O., Psaty, B.M., Passmore, P., Younkin,  
1427 S.G., Berr, C., Gudnason, V., Rujescu, D., Dickson, D.W., Dartigues, J.F., Destefano, A.L.,  
1428 Ortega-Cubero, S., Hakonarson, H., Campion, D., Boada, M., Kauwe, J.K., Farrer, L.A.,  
1429 Van Broeckhoven, C., Ikram, M.A., Jones, L., Haines, J.L., Tzourio, C., Tzourio, C.,  
1430 Escott-Price, V., Mayeux, R., Deleuze, J.F., Amin, N., Goate, A.M., Pericak-Vance, M.A.,  
1431 Amouyel, P., Van Duijn, C.M., Ramirez, A., Wang, L.S., Lambert, J.C., Seshadri, S.,  
1432 Williams, J., Schellenberg, G.D., 2017. Rare coding variants in PLCG2, ABI3, and TREM2  
1433 implicate microglial-mediated innate immunity in Alzheimer's disease. *Nat. Genet.* 49,  
1434 1373–1384. <https://doi.org/10.1038/ng.3916>
- 1435 Soderling, S.H., Guire, E.S., Kaech, S., White, J., Zhang, F., Schutz, K., Langeberg, L.K.,  
1436 Banker, G., Raber, J., Scott, J.D., 2007. A WAVE-1 and WRP Signaling Complex  
1437 Regulates Spine Density, Synaptic Plasticity, and Memory. *J. Neurosci.* 27, 355–365.  
1438 <https://doi.org/10.1523/jneurosci.3209-06.2006>
- 1439 Soderling, S.H., Langeberg, L.K., Soderling, J.A., Davee, S.M., Simerly, R., Raber, J., Scott,  
1440 J.D., H., S.S., K., L.L., A., S.J., M., D.S., Richard, S., Jacob, R., D., S.J., 2003. Loss of  
1441 WAVE-1 causes sensorimotor retardation and reduced learning and memory in mice. *Proc.*  
1442 *Natl. Acad. Sci.* 100, 1723–1728. <https://doi.org/10.1073/pnas.0438033100>
- 1443 Spudich, J.A., Watt, S., 1971. The Regulation of Rabbit Skeletal Muscle Contraction. *J. Biol.*  
1444 *Chem.* 246, 4866–4871. [https://doi.org/10.1016/s0021-9258\(18\)62016-2](https://doi.org/10.1016/s0021-9258(18)62016-2)
- 1445 Srivastava, S., Macke, E.L., Swanson, L.C., Coulter, D., Klee, E.W., Mullegama, S. V., Xie, Y.,  
1446 Lanpher, B.C., Bedoukian, E.C., Skraban, C.M., Villard, L., Milh, M., Leppert, M.L.O.,  
1447 Cohen, J.S., 2021. Expansion of the genotypic and phenotypic spectrum of wasf1-related  
1448 neurodevelopmental disorder. *Brain Sci.* 11, 1–10.  
1449 <https://doi.org/10.3390/brainsci11070931>
- 1450 Stephan, R., Gohl, C., Fleige, A., Klämbt, C., Bogdan, S., 2011. Membrane-targeted WAVE  
1451 mediates photoreceptor axon targeting in the absence of the WAVE complex in *Drosophila*.  
1452 *Mol. Biol. Cell* 22, 4079–4092. <https://doi.org/10.1091/mbc.E11-02-0121>

- 1453 Tahirovic, S., Hellal, F., Neukirchen, D., Hindges, R., Garvalov, B.K., Flynn, K.C., Stradal, T.E.,  
1454 Chrostek-Grashoff, A., Brakebusch, C., Bradke, F., 2010. Rac1 regulates neuronal  
1455 polarization through the WAVE complex. *J. Neurosci.* 30, 6930–6943.  
1456 <https://doi.org/10.1523/JNEUROSCI.5395-09.2010>
- 1457 Takenawa, T., Suetsugu, S., 2007. The WASP-WAVE protein network: Connecting the  
1458 membrane to the cytoskeleton. *Nat. Rev. Mol. Cell Biol.* 8, 37–48.  
1459 <https://doi.org/10.1038/nrm2069>
- 1460 Tang, L.T., Diaz-Balzac, C.A., Rahman, M., Ramirez-Suarez, N.J., Salzberg, Y., Lázaro-Peña,  
1461 M.I., Bülow, H.E., 2019. TIAM-1/GEF can shape somatosensory dendrites independently  
1462 of its GEF activity by regulating F-actin localization. *Elife* 8, 1–27.  
1463 <https://doi.org/10.7554/elife.38949>
- 1464 Tavosanis, G., 2012. Dendritic structural plasticity. *Dev. Neurobiol.* 72, 73–86.  
1465 <https://doi.org/10.1002/dneu.20951>
- 1466 Turjanski, A.G., Gutkind, J.S., Best, R.B., Hummer, G., 2008. Binding-Induced Folding of a  
1467 Natively Unstructured Transcription Factor. *PLOS Comput. Biol.* 4, e1000060.
- 1468 Wang, W., Lo, K.W.-H., Kan, H.-M., Fan, J.-S., Zhang, M., 2003. Structure of the monomeric 8-  
1469 kDa dynein light chain and mechanism of the domain-swapped dimer assembly. *J. Biol.*  
1470 *Chem.* 278, 41491–41499. <https://doi.org/10.1074/jbc.M307118200>
- 1471 Wang, X., Jiang, W., Luo, S., Yang, X., Wang, C., Wang, B., Dang, Y., Shen, Y., Ma, D.K.,  
1472 2021. The *C. elegans* homolog of human panic-disorder risk gene TMEM132D orchestrates  
1473 neuronal morphogenesis through the WAVE-regulatory complex. *Mol. Brain* 14, 54.  
1474 <https://doi.org/10.1186/s13041-021-00767-w>
- 1475 Weeds, A., Maciver, S., 1993. F-actin capping proteins. *Curr. Opin. Cell Biol.* 5, 63–69.  
1476 [https://doi.org/10.1016/S0955-0674\(05\)80009-2](https://doi.org/10.1016/S0955-0674(05)80009-2)
- 1477 Wu, S., Zhang, Y., 2007. LOMETS: a local meta-threading-server for protein structure  
1478 prediction. *Nucleic Acids Res.* 35, 3375–3382. <https://doi.org/10.1093/nar/gkm251>
- 1479 Xing, G., Li, M., Sun, Y., Rui, M., Zhuang, Y., Lv, H., Han, J., Jia, Z., Xie, W., 2018. Neurexin–  
1480 neuroligin 1 regulates synaptic morphology and functions via the WAVE regulatory  
1481 complex in *Drosophila* neuromuscular junction. *Elife* 7, 1–23.  
1482 <https://doi.org/10.7554/eLife.30457>
- 1483 Yamazaki, D., Fujiwara, T., Suetsugu, S., Takenawa, T., 2005. A novel function of WAVE in



- 1484 lamellipodia: WAVE1 is required for stabilization of lamellipodial protrusions during cell  
1485 spreading. *Genes Cells* 10, 381–392. <https://doi.org/10.1111/j.1365-2443.2005.00845.x>
- 1486 Yan, Z., Kim, E., Datta, D., Lewis, D.A., Soderling, S.H., 2016. Synaptic Actin Dysregulation, a  
1487 Convergent Mechanism of Mental Disorders? *J. Neurosci.* 36, 11411–11417.  
1488 <https://doi.org/10.1523/jneurosci.2360-16.2016>
- 1489 Yokoyama, K., Tezuka, T., Kotani, M., Nakazawa, T., Hoshina, N., Shimoda, Y., Kakuta, S.,  
1490 Sudo, K., Watanabe, K., Iwakura, Y., Yamamoto, T., 2011. NYAP: A phosphoprotein  
1491 family that links PI3K to WAVE1 signalling in neurons. *EMBO J.* 30, 4739–4754.  
1492 <https://doi.org/10.1038/emboj.2011.348>
- 1493 Zhao, A., Zhou, R., Gu, Q., Liu, M., Zhang, B., Huang, J., Yang, B., Yao, R., Wang, J., Lv, H.,  
1494 Wang, J., Shen, Y., Wang, H., Chen, X., 2021. Trio exome sequencing identified a novel de  
1495 novo WASF1 missense variant leading to recurrent site substitution in a Chinese patient  
1496 with developmental delay, microcephaly, and early-onset seizures: a mutational hotspot  
1497 p.Trp161 and literature review. *Clin. Chim. Acta.* <https://doi.org/10.1016/j.cca.2021.08.030>
- 1498 Zhao, B., Meka, D.P., Scharrenberg, R., König, T., Schwanke, B., Kobler, O., Windhorst, S.,  
1499 Kreutz, M.R., Mikhaylova, M., Calderon de Anda, F., 2017. Microtubules Modulate F-actin  
1500 Dynamics during Neuronal Polarization. *Sci. Rep.* 7, 9583. [https://doi.org/10.1038/s41598-](https://doi.org/10.1038/s41598-017-09832-8)  
1501 [017-09832-8](https://doi.org/10.1038/s41598-017-09832-8)
- 1502 Zhou, P., Wagner, G., 2010. Overcoming the solubility limit with solubility-enhancement tags:  
1503 successful applications in biomolecular NMR studies. *J. Biomol. NMR* 46, 23–31.  
1504 <https://doi.org/10.1007/s10858-009-9371-6>
- 1505 Zou, W., Dong, X., Broederdorf, T.R., Shen, A., Kramer, D.A., Shi, R., Liang, X., Miller, D.M.,  
1506 Xiang, Y.K., Yasuda, R., Chen, B., Shen, K., 2018. A Dendritic Guidance Receptor  
1507 Complex Brings Together Distinct Actin Regulators to Drive Efficient F-Actin Assembly  
1508 and Branching. *Dev. Cell* 45, 362-375.e3. <https://doi.org/10.1016/j.devcel.2018.04.008>
- 1509 Zou, W., Shen, A., Dong, X., Tugizova, M., Xiang, Y.K., Shen, K., 2016. A multi-protein  
1510 receptor-ligand complex underlies combinatorial dendrite guidance choices in *C. elegans*.  
1511 *Elife* 5, 1–25. <https://doi.org/10.7554/elife.18345>
- 1512 Zweier, M., Begemann, A., McWalter, K., Cho, M.T., Abela, L., Banka, S., Behring, B., Berger,  
1513 A., Brown, C.W., Carneiro, M., Chen, J., Cooper, G.M., Finnilla, C.R., Guillen Sacoto, M.J.,  
1514 Henderson, A., Hüffmeier, U., Joset, P., Kerr, B., Lesca, G., Leszinski, G.S., McDermott,

1515 J.H., Meltzer, M.R., Monaghan, K.G., Mostafavi, R., Öunap, K., Plecko, B., Powis, Z.,  
1516 Purcarin, G., Reimand, T., Riedhammer, K.M., Schreiber, J.M., Sirsi, D., Wierenga, K.J.,  
1517 Wojcik, M.H., Papuc, S.M., Steindl, K., Sticht, H., Rauch, A., 2019. Spatially clustering de  
1518 novo variants in CYFIP2, encoding the cytoplasmic FMRP interacting protein 2, cause  
1519 intellectual disability and seizures. *Eur. J. Hum. Genet.* 27, 747–759.  
1520 <https://doi.org/10.1038/s41431-018-0331-z>  
1521  
1522



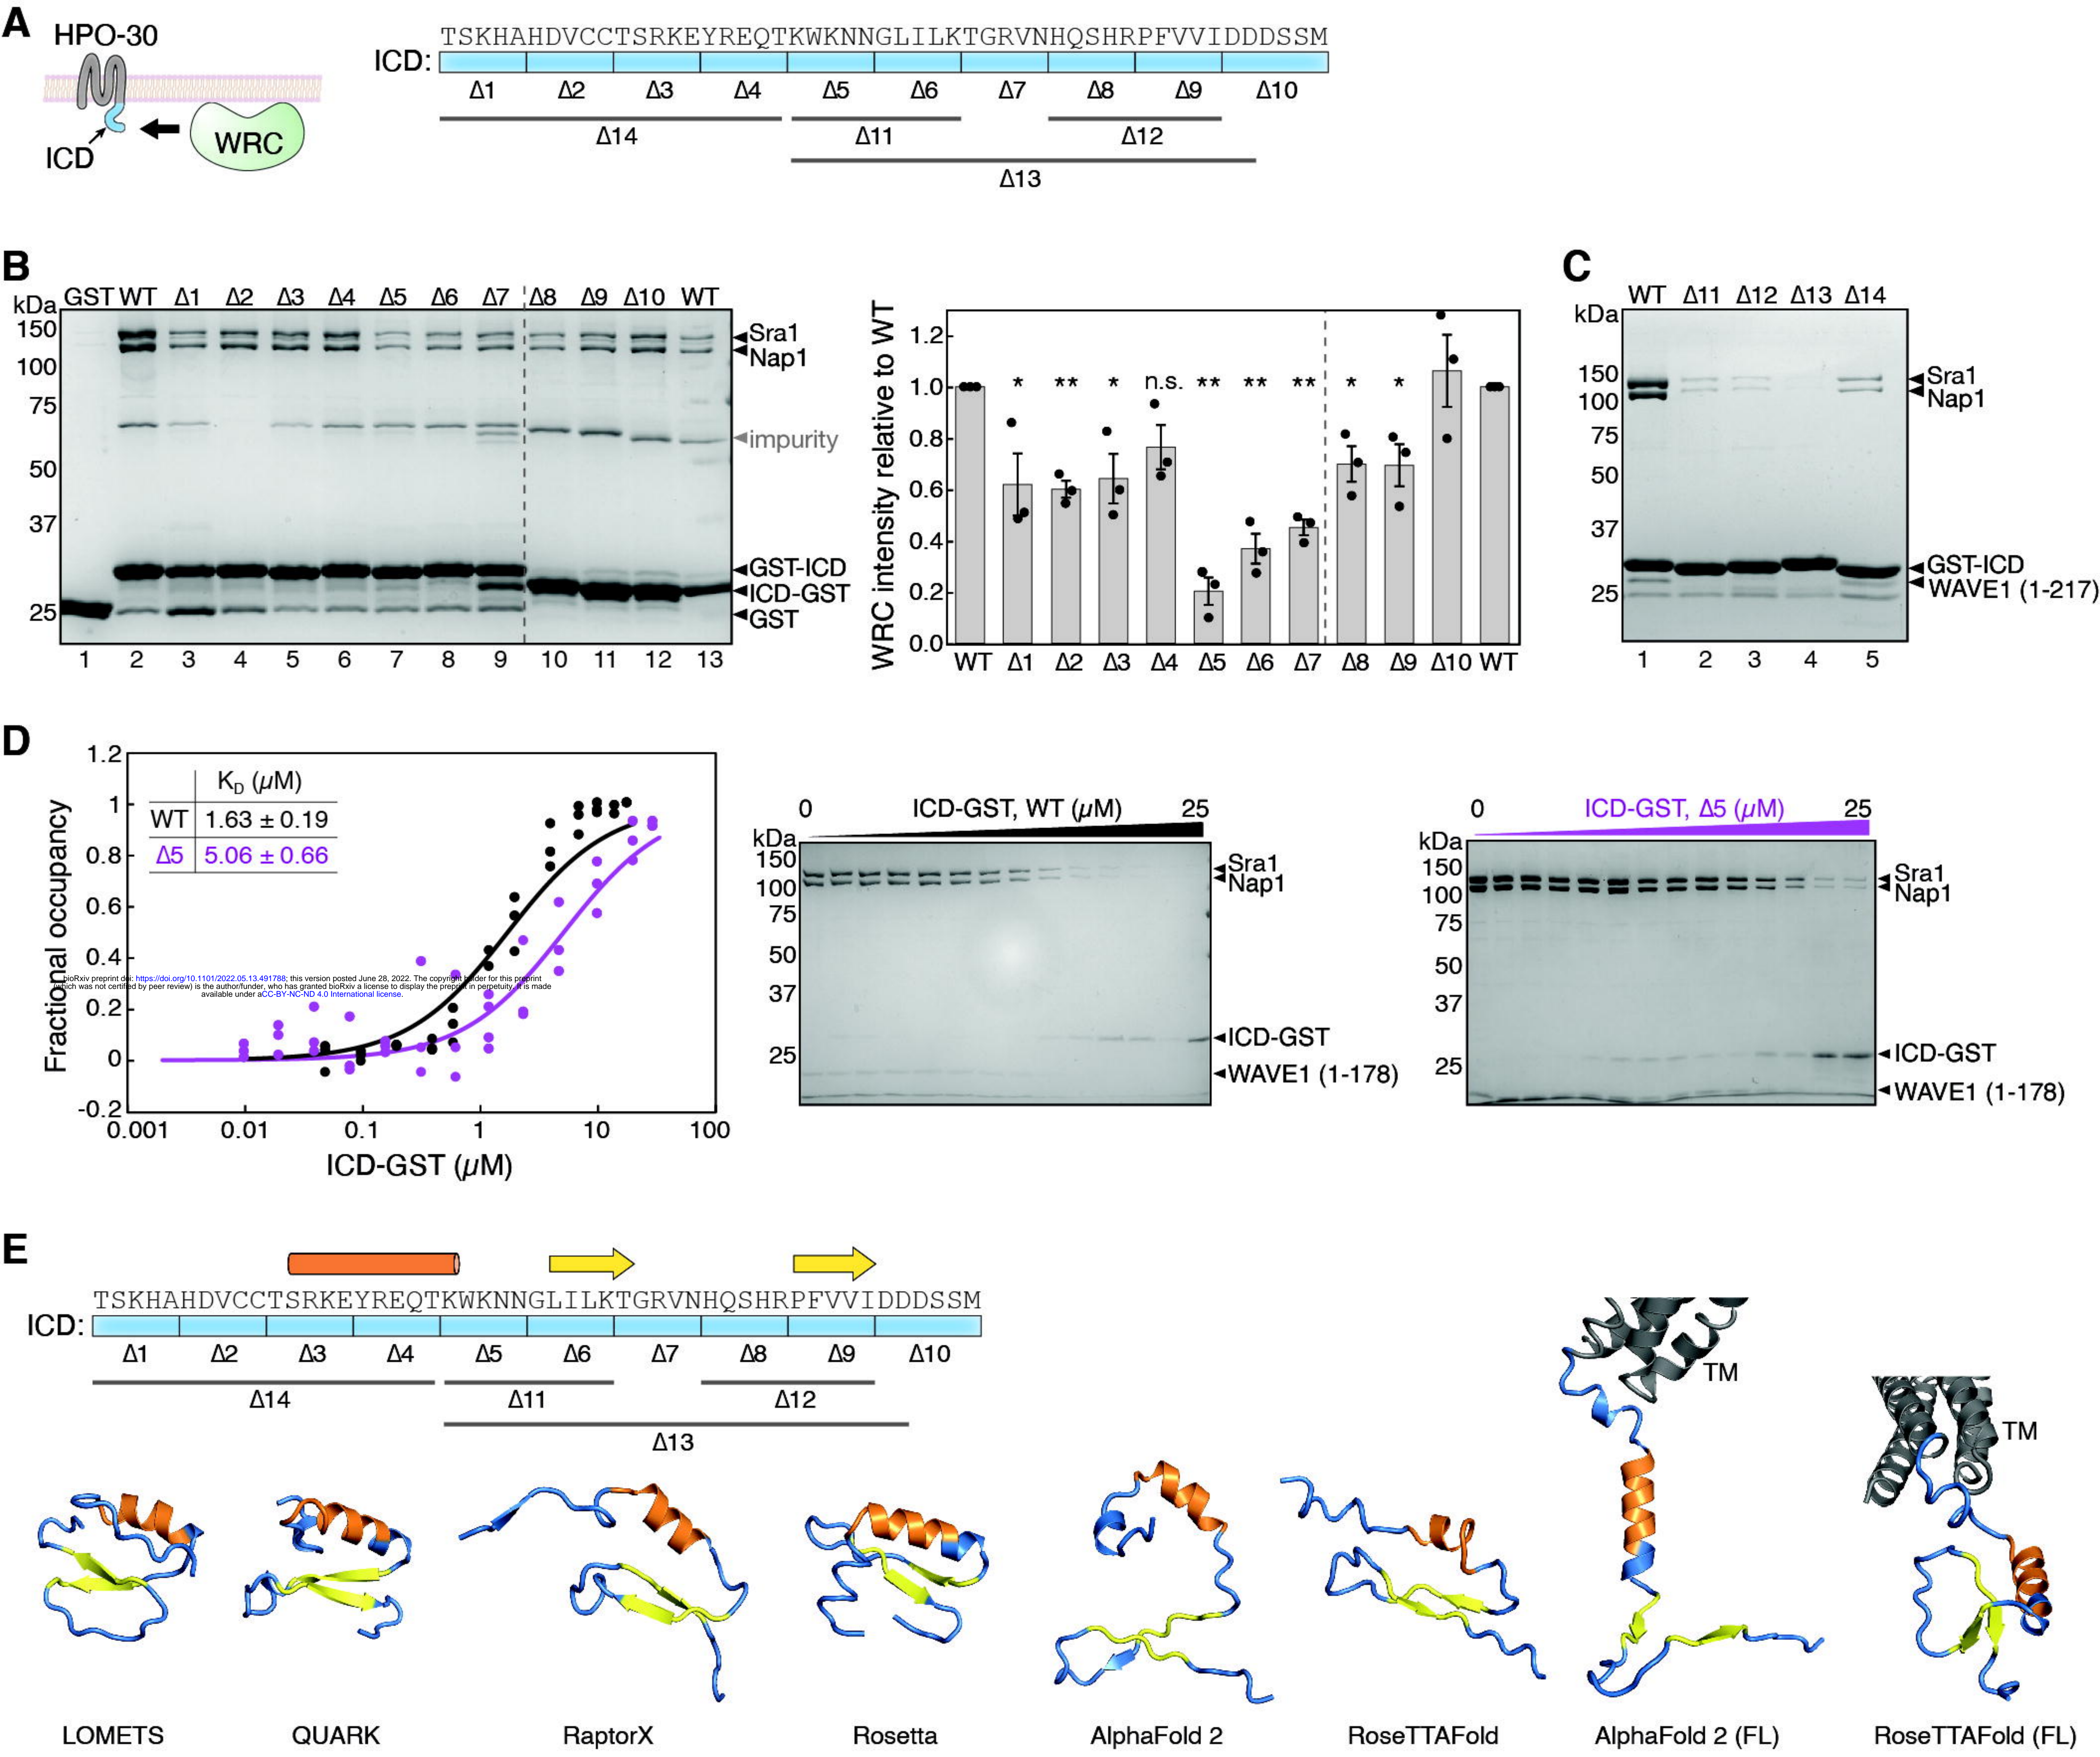



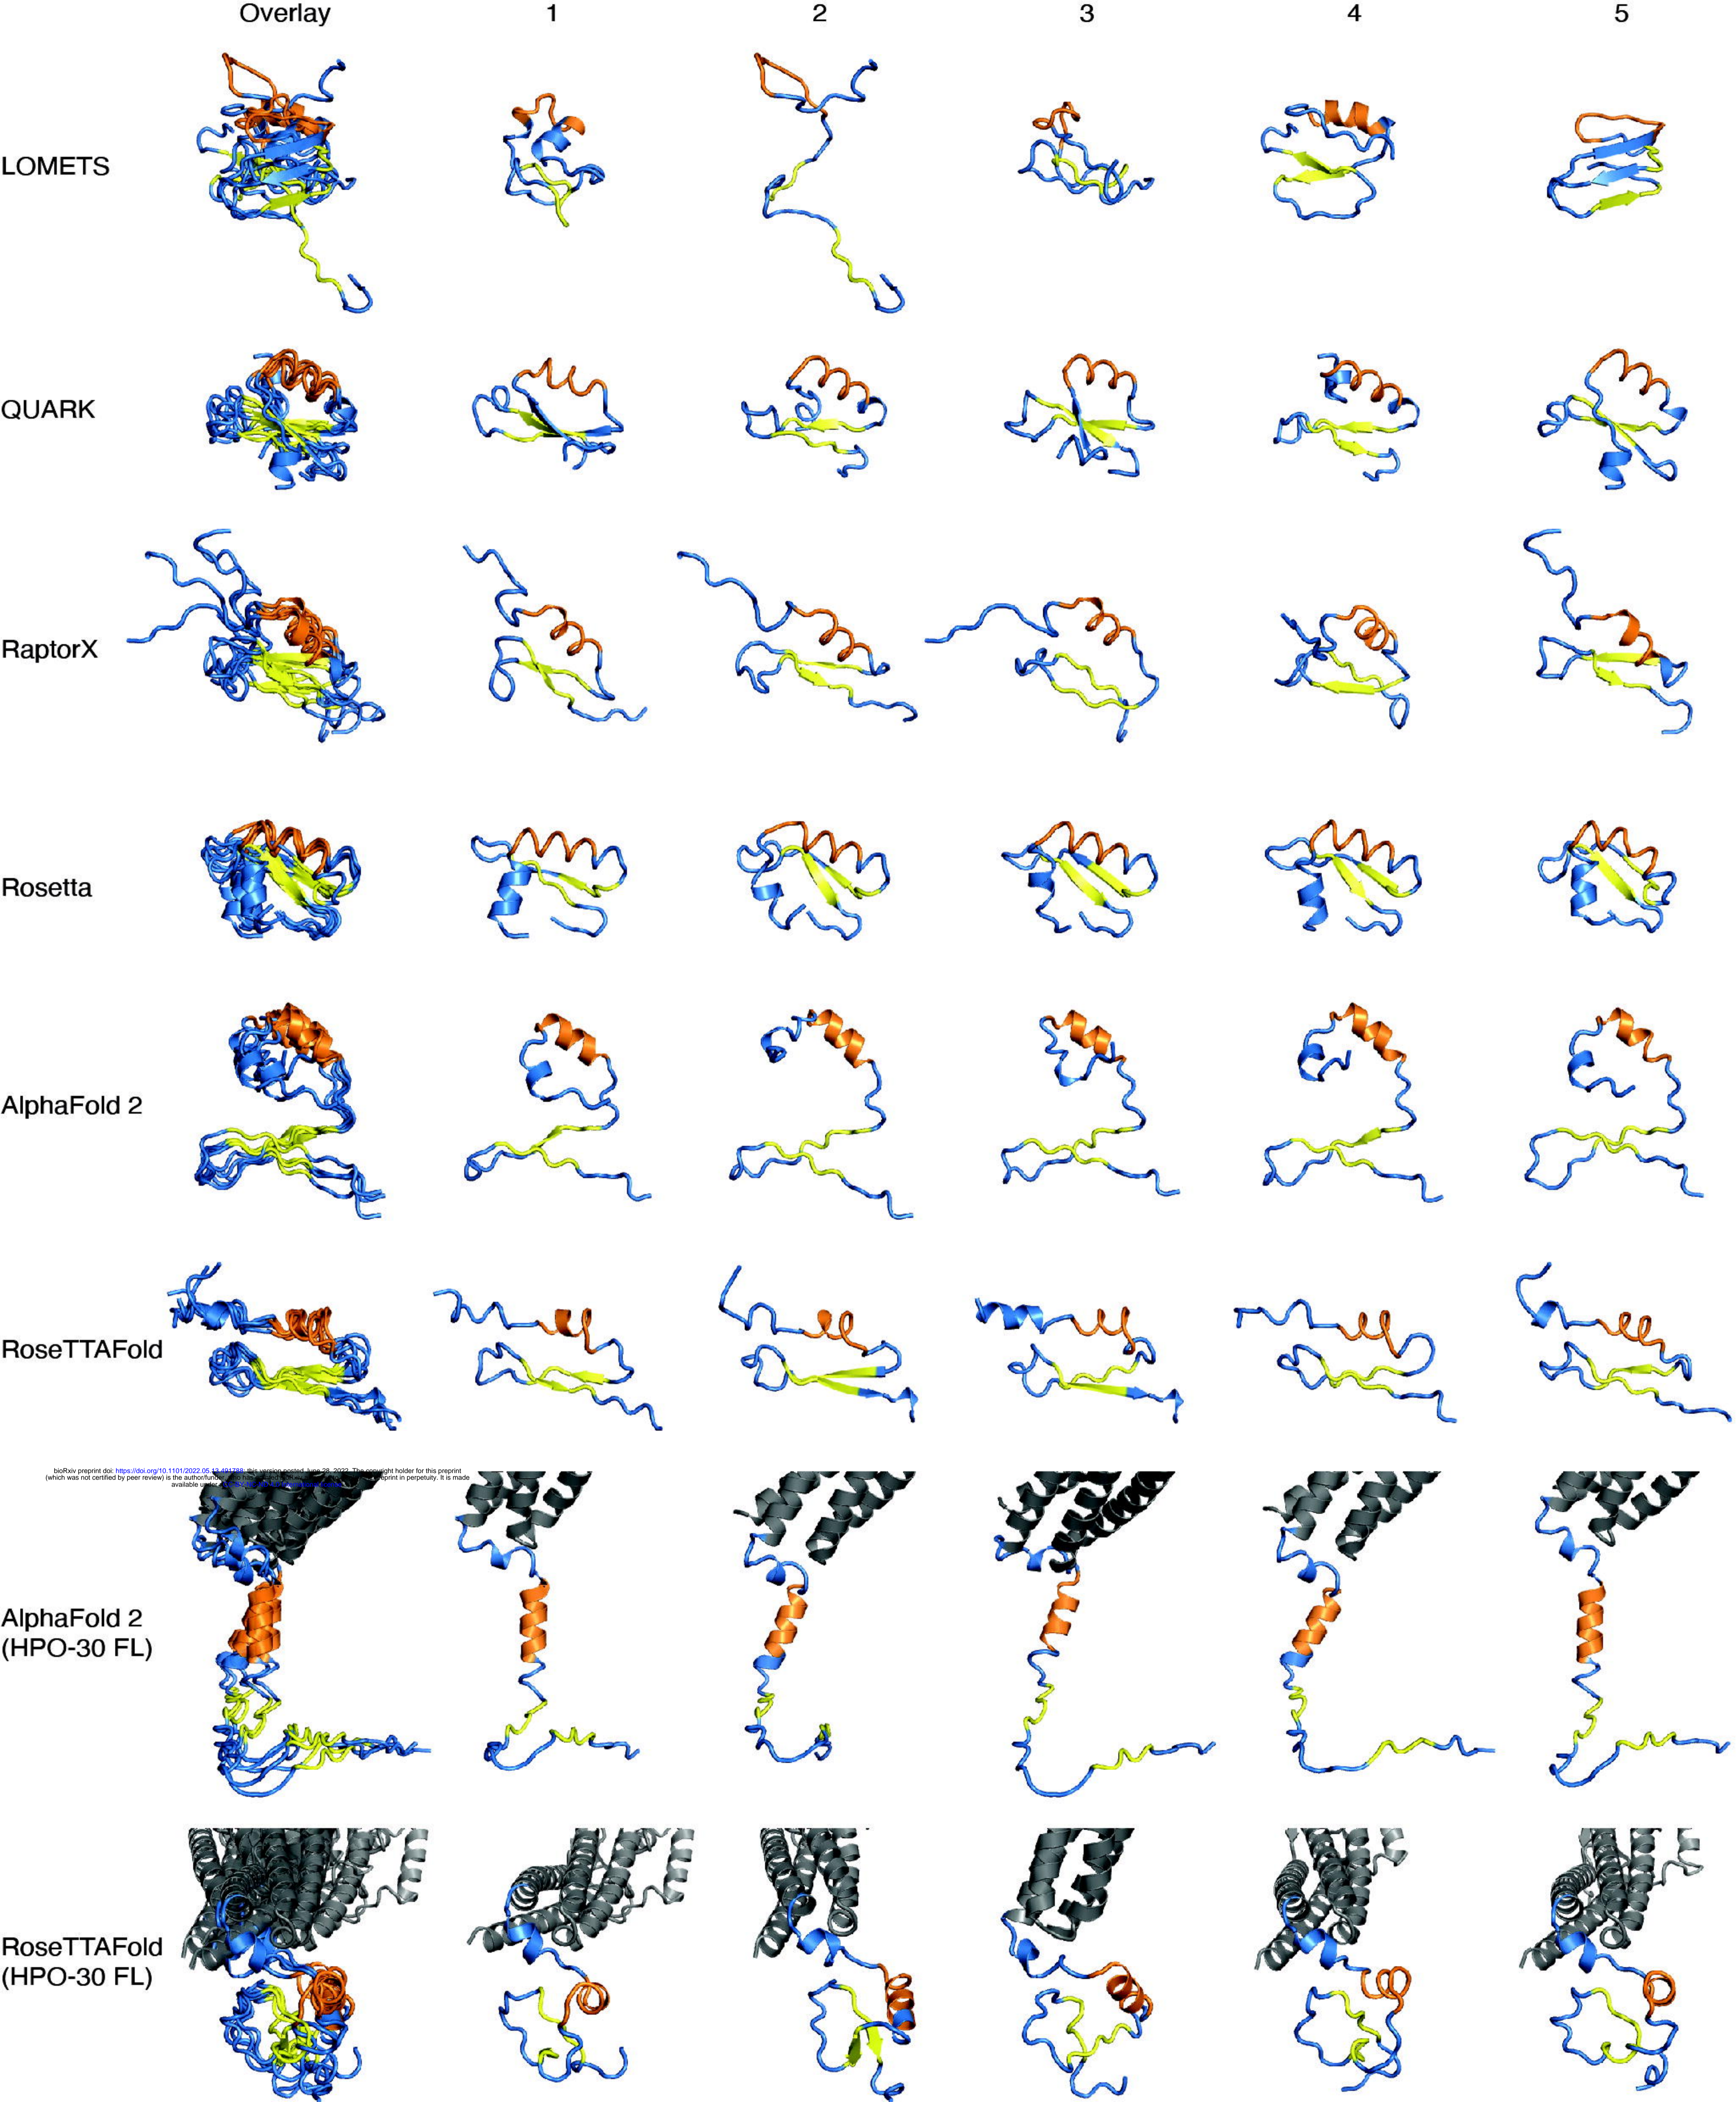

bioRxiv preprint doi: <https://doi.org/10.1101/2022.05.12.491788>; this version posted June 29, 2022. The copyright holder for this preprint (which was not certified by peer review) is the author/funder, who has granted bioRxiv a license to display the preprint in perpetuity. It is made available under aCC-BY-NC-ND 4.0 International license.



**A**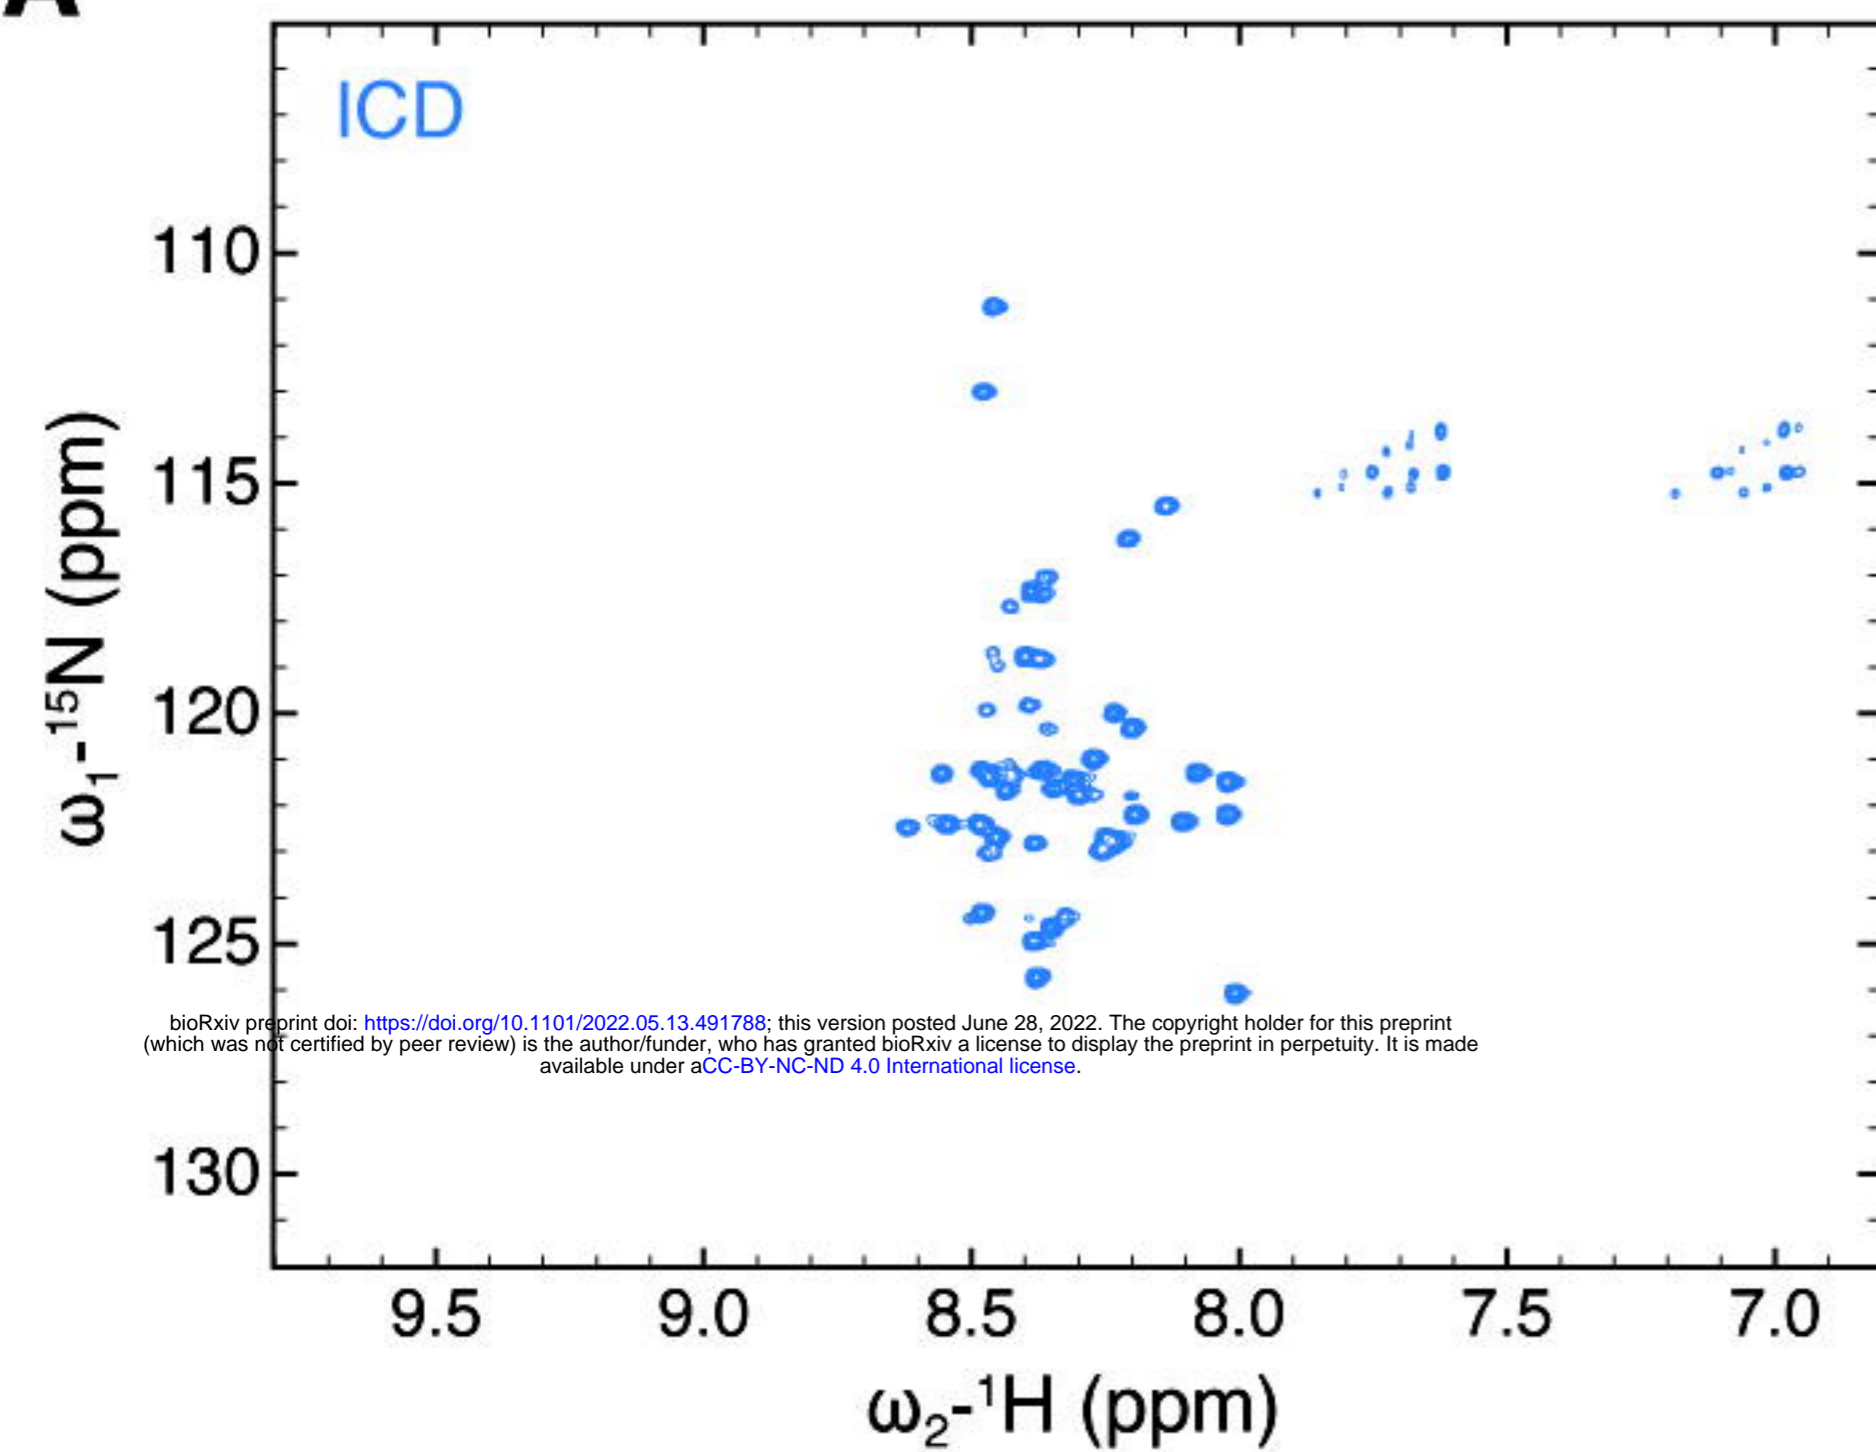**B**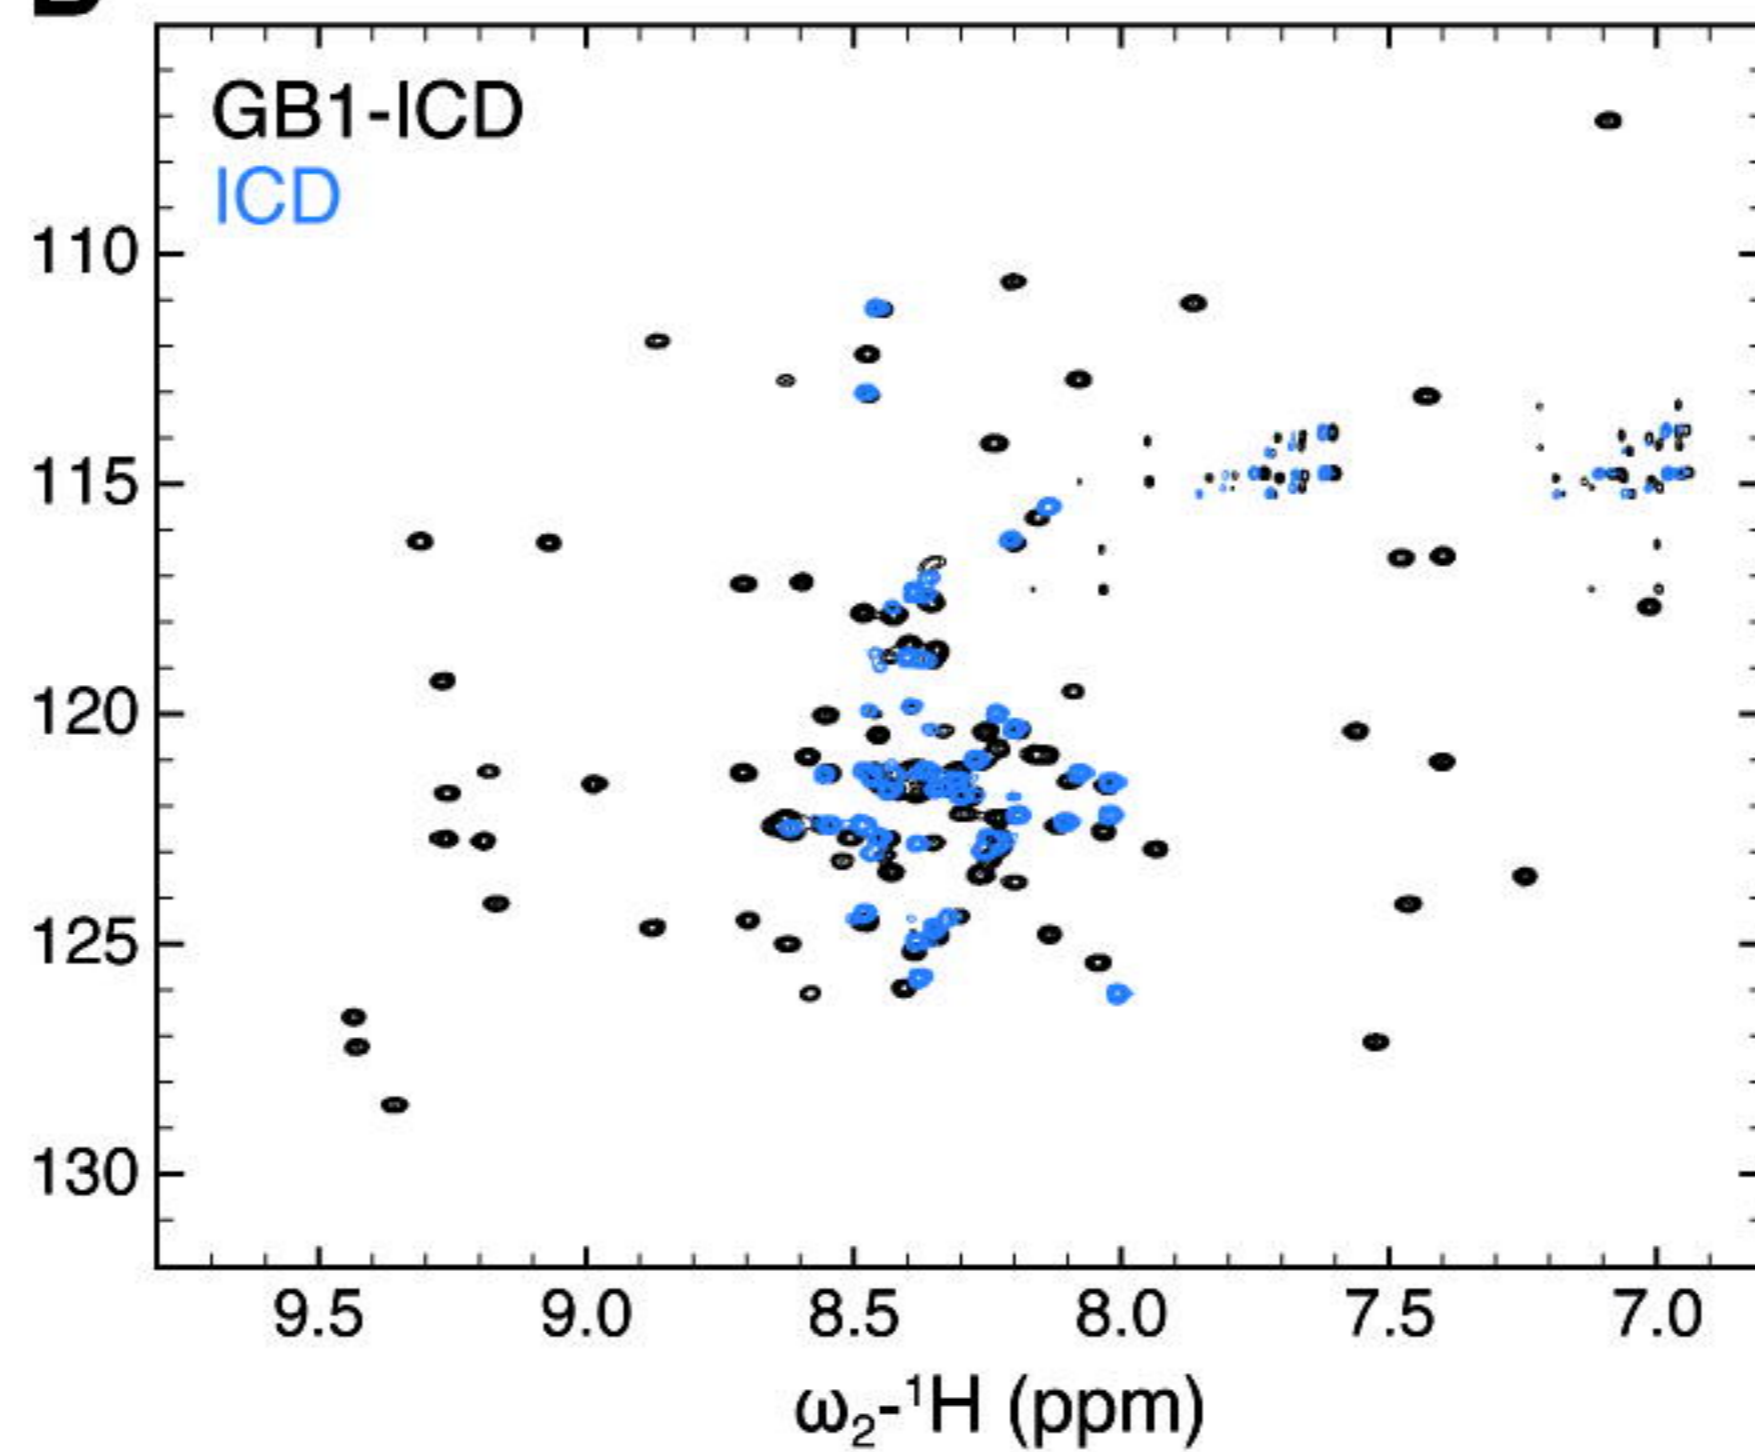**C**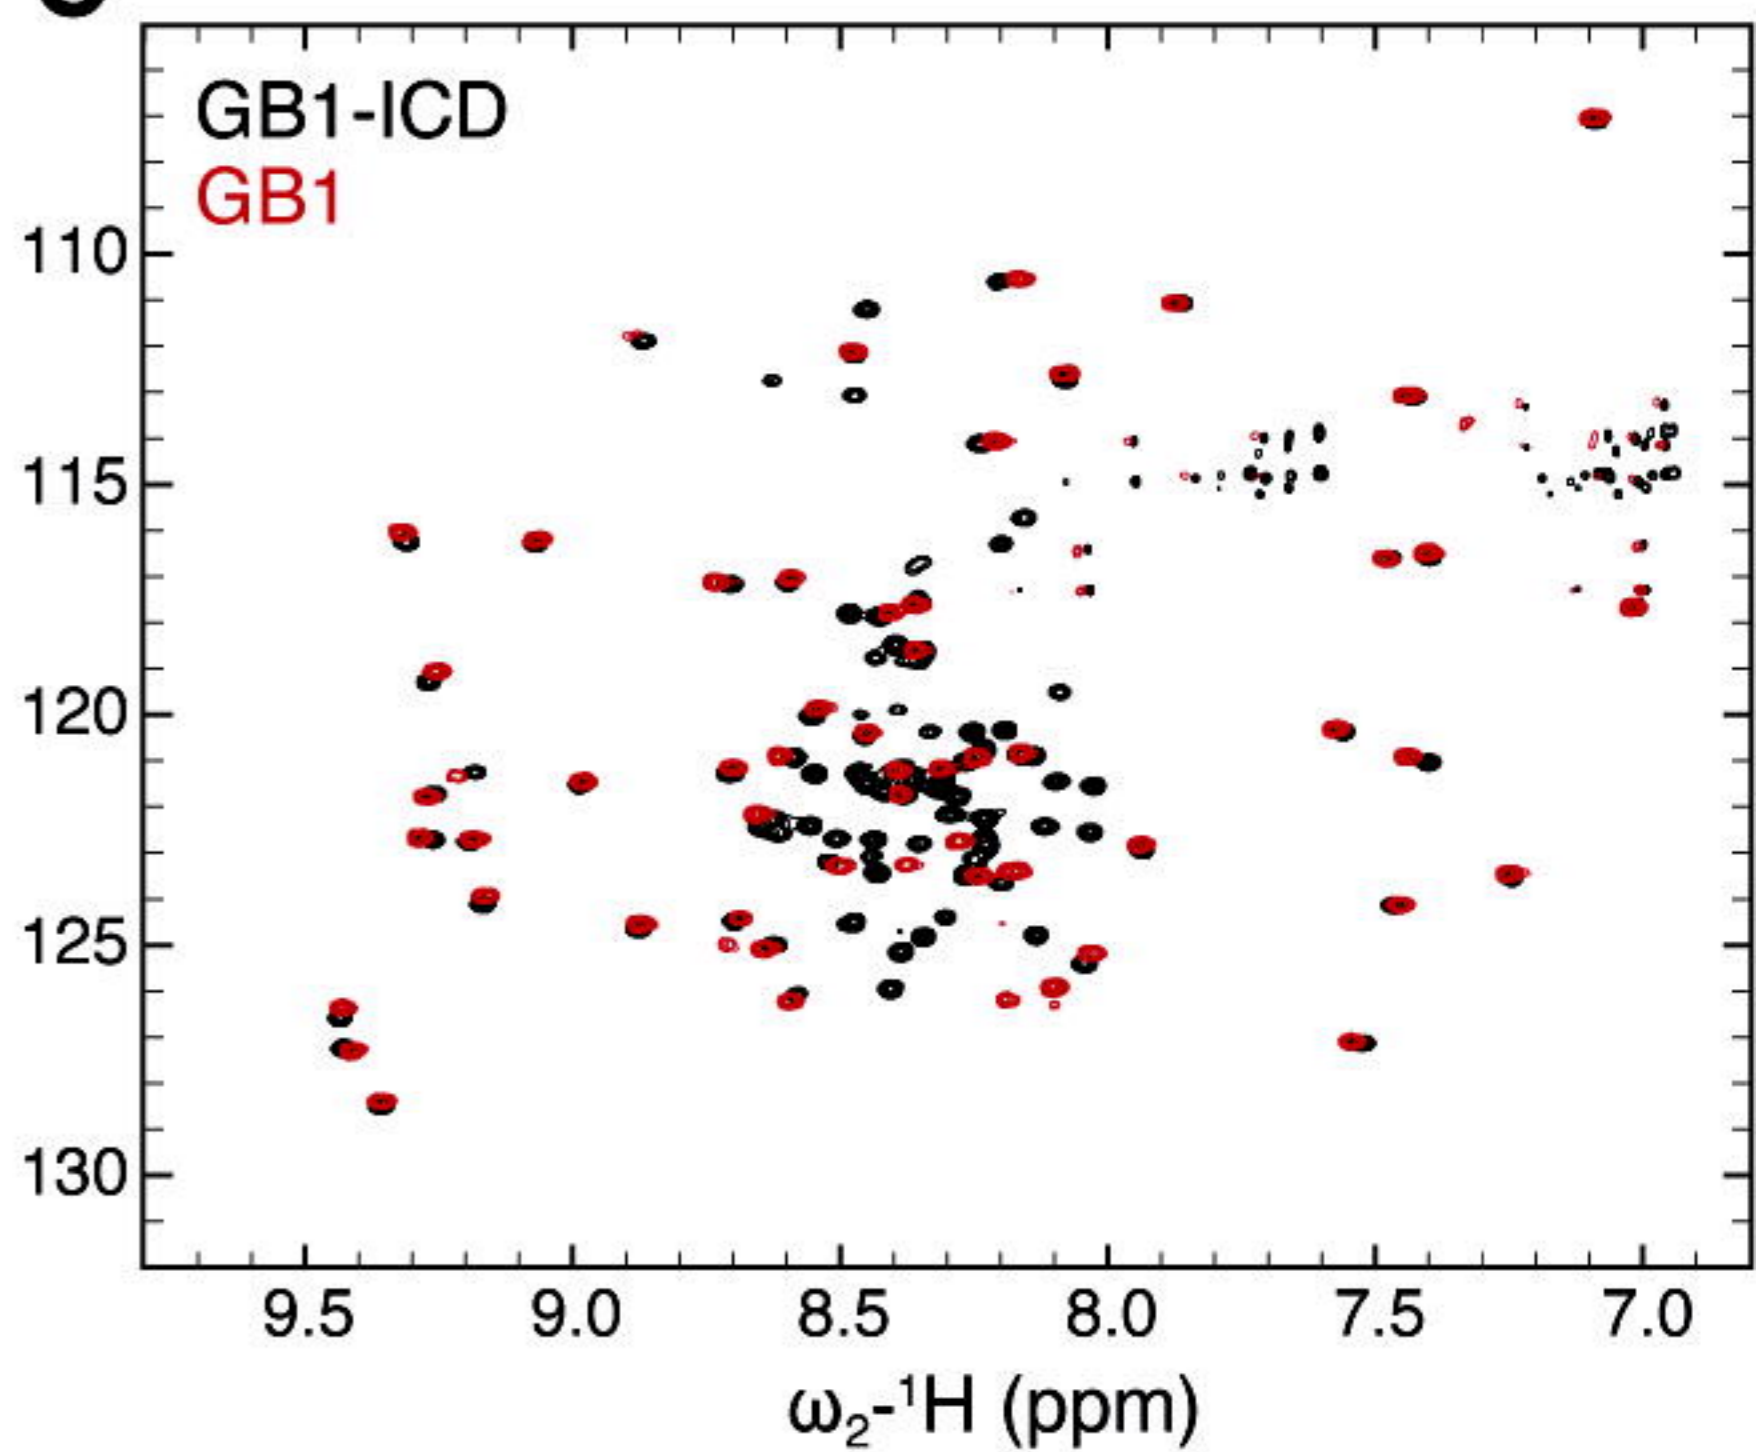**D**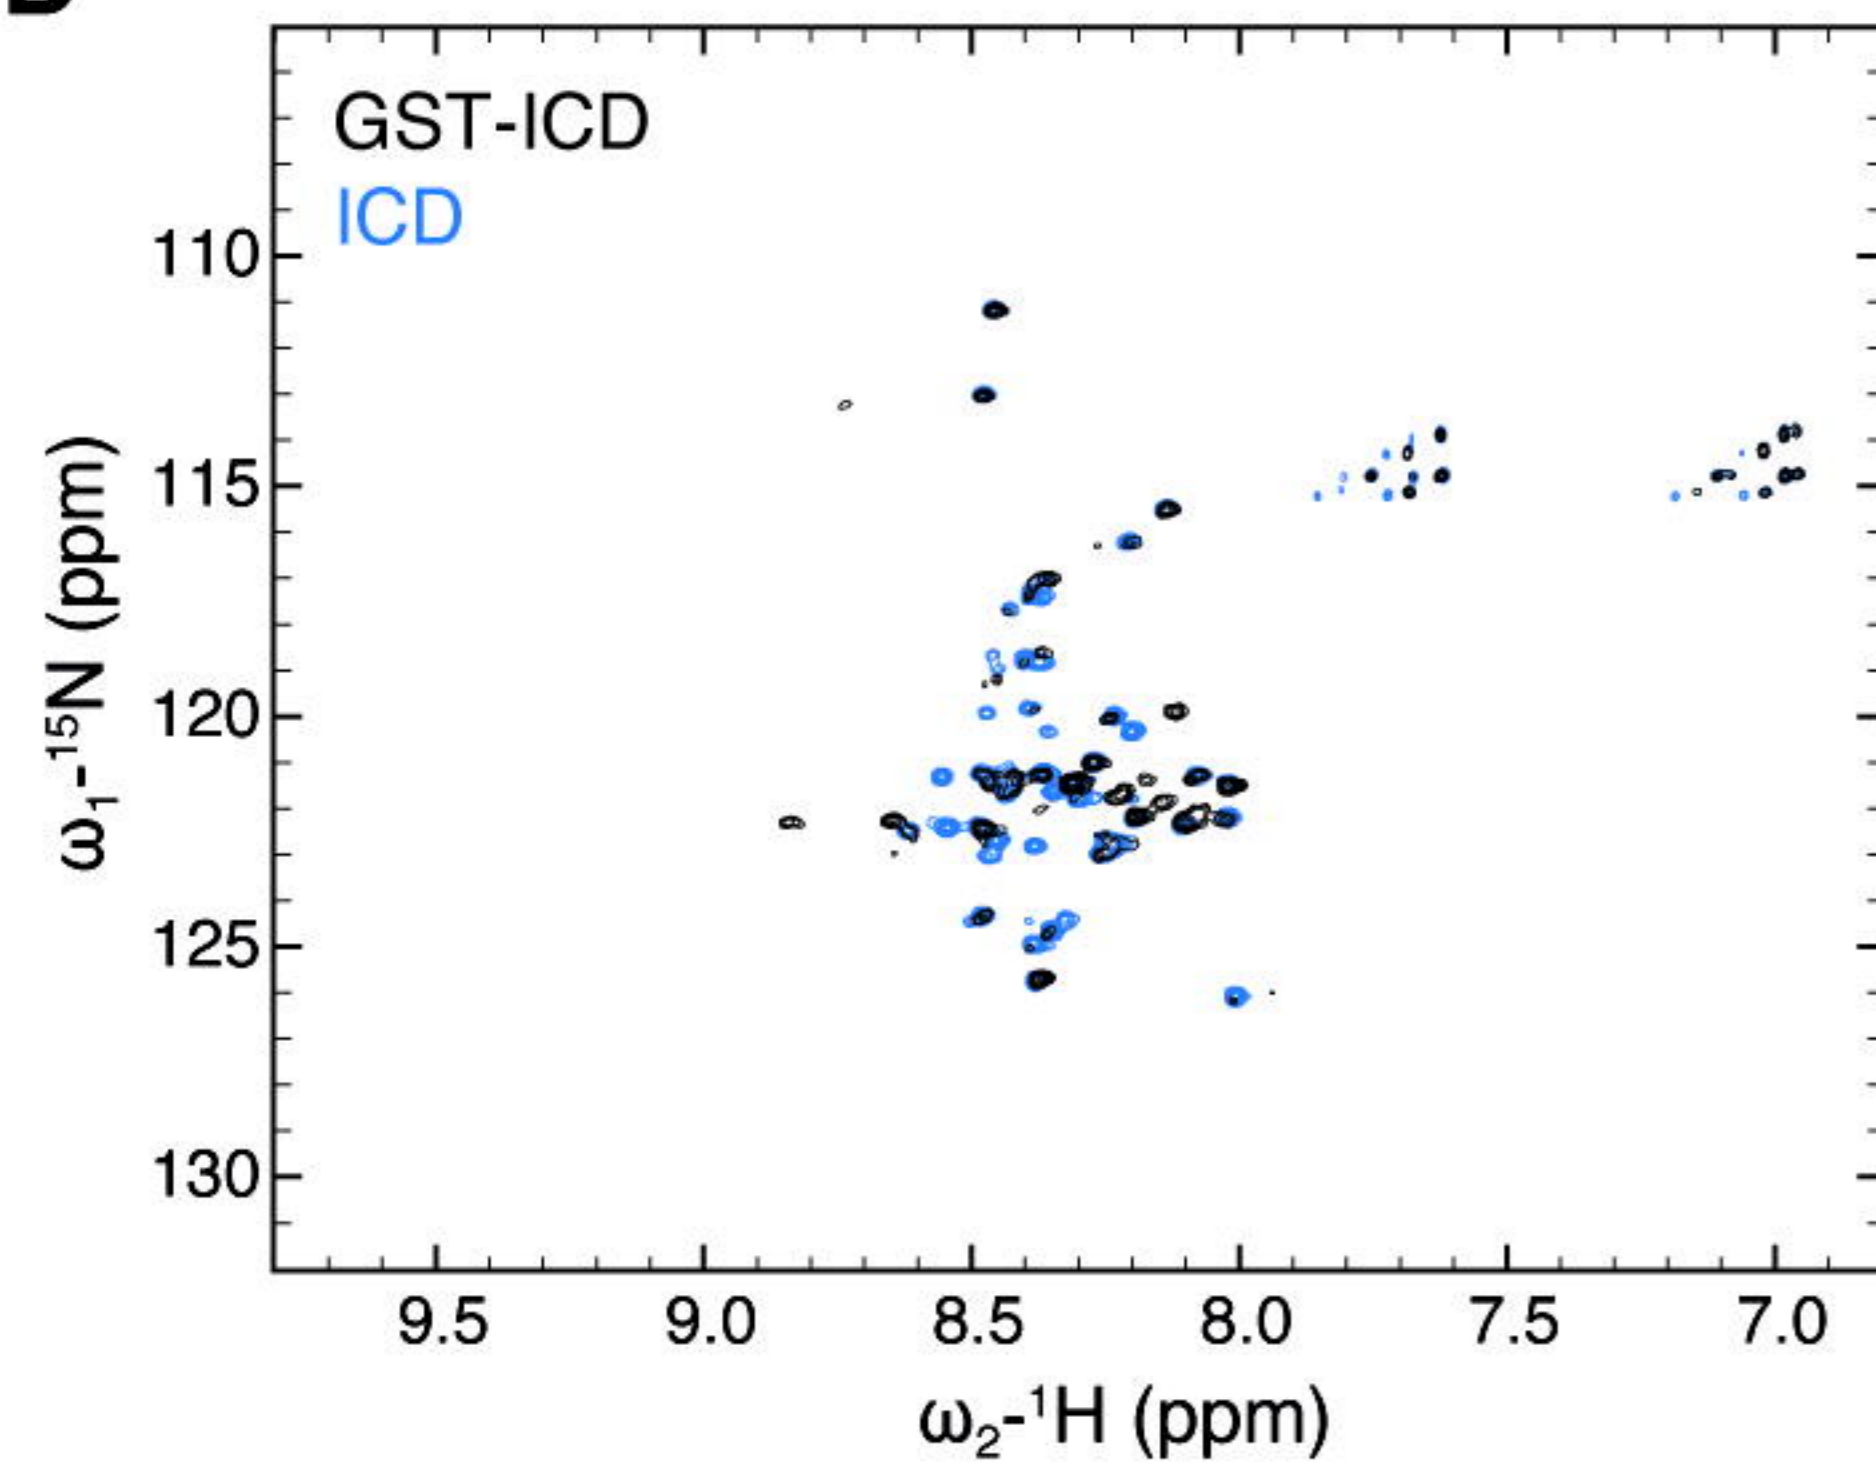**E**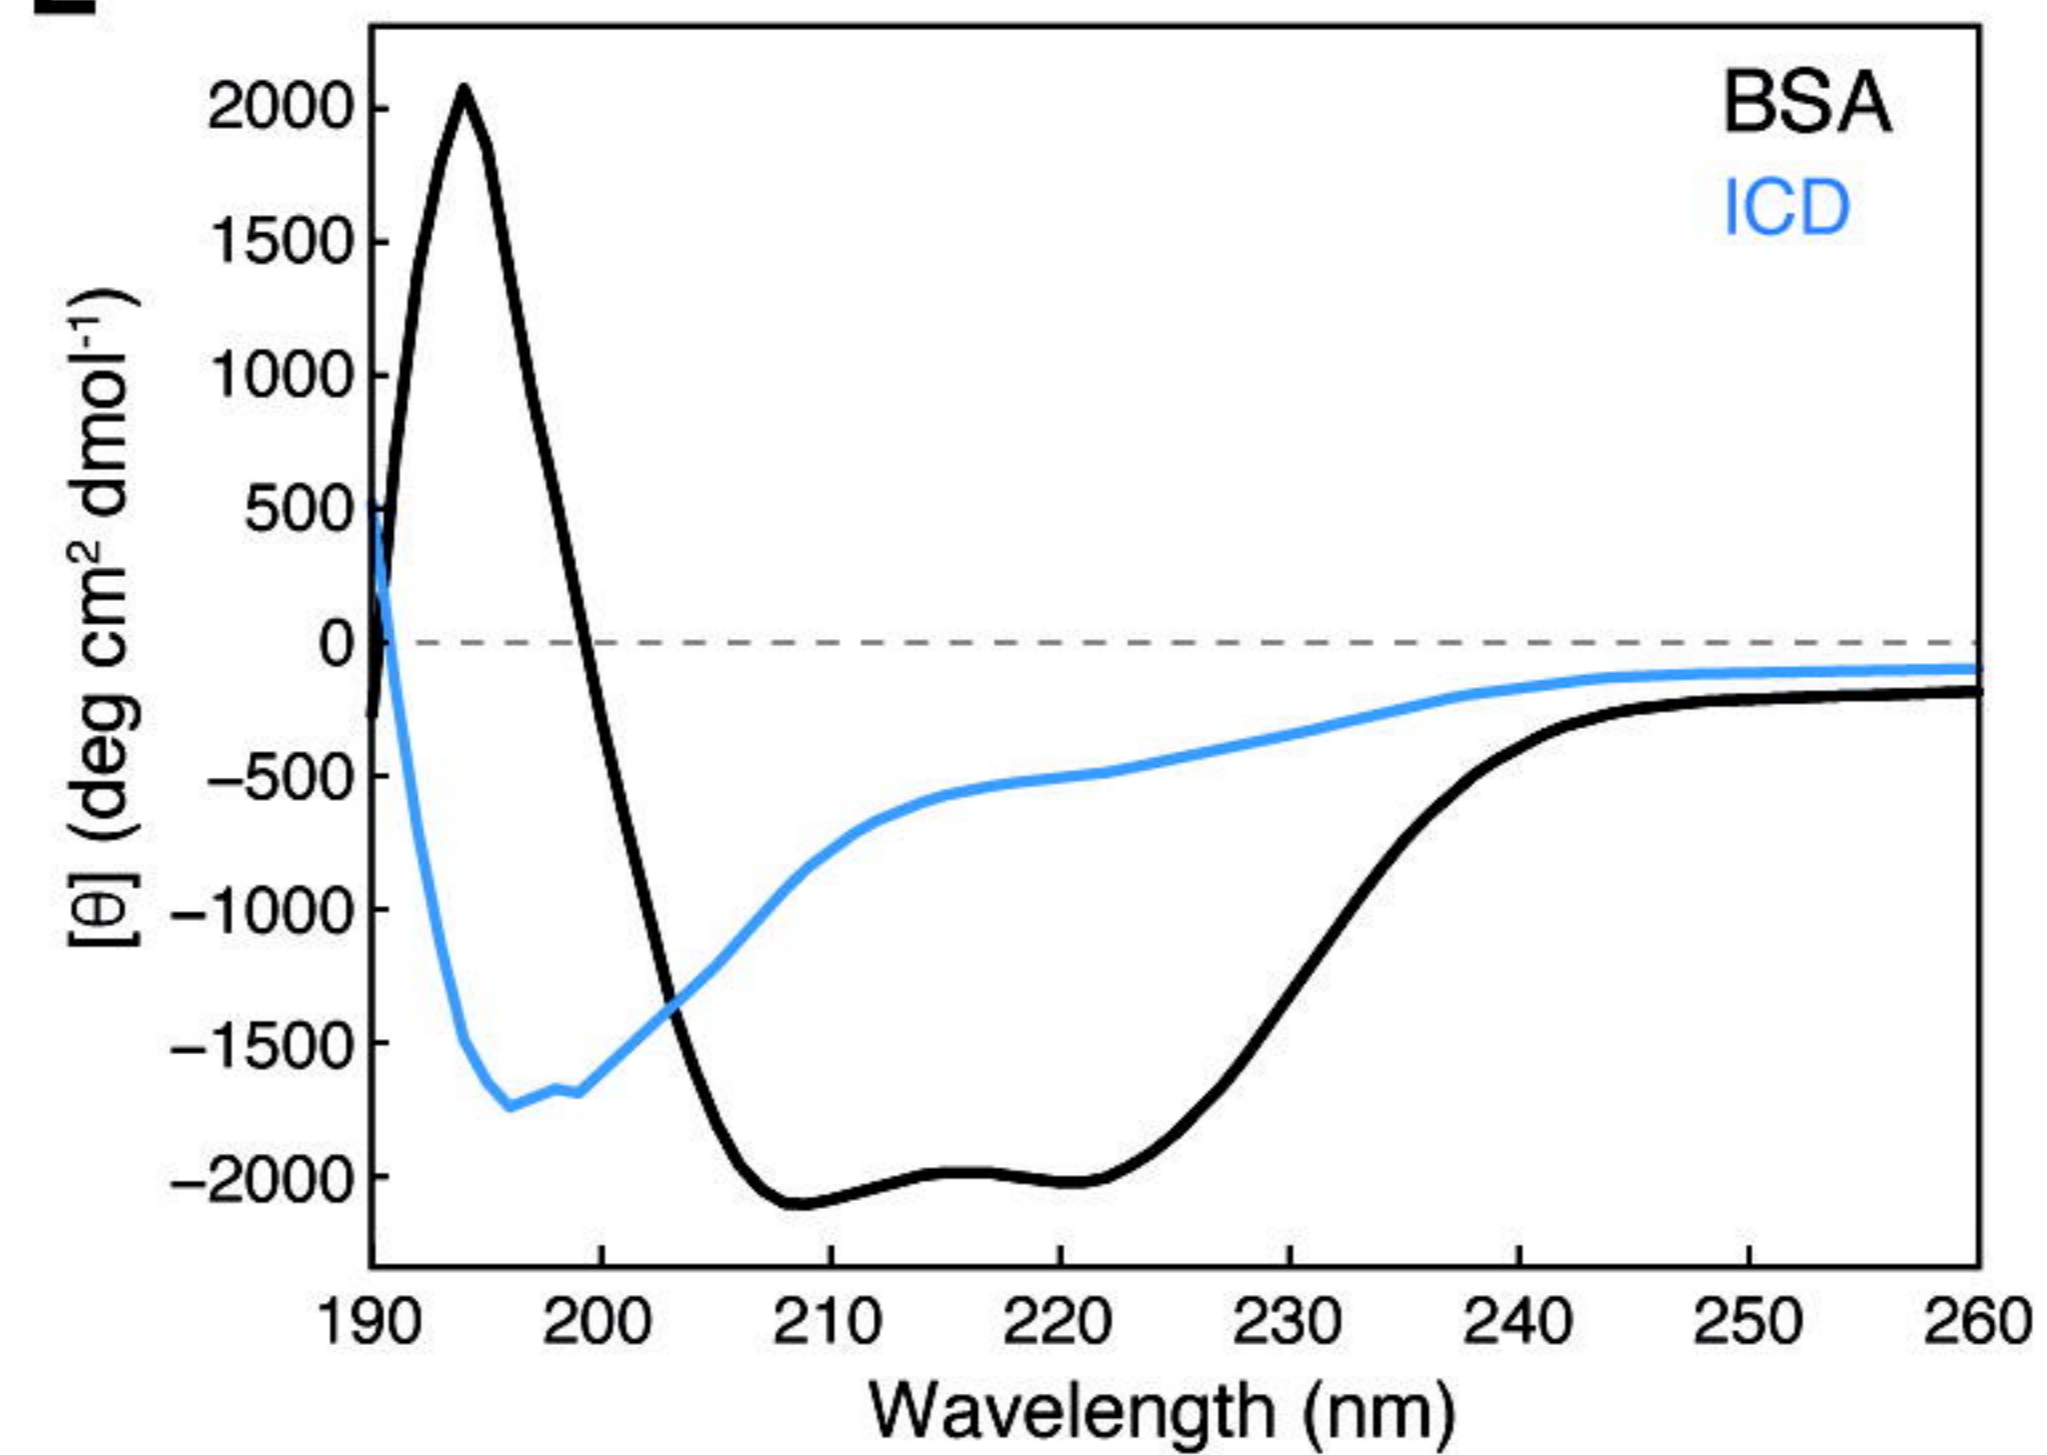



**A**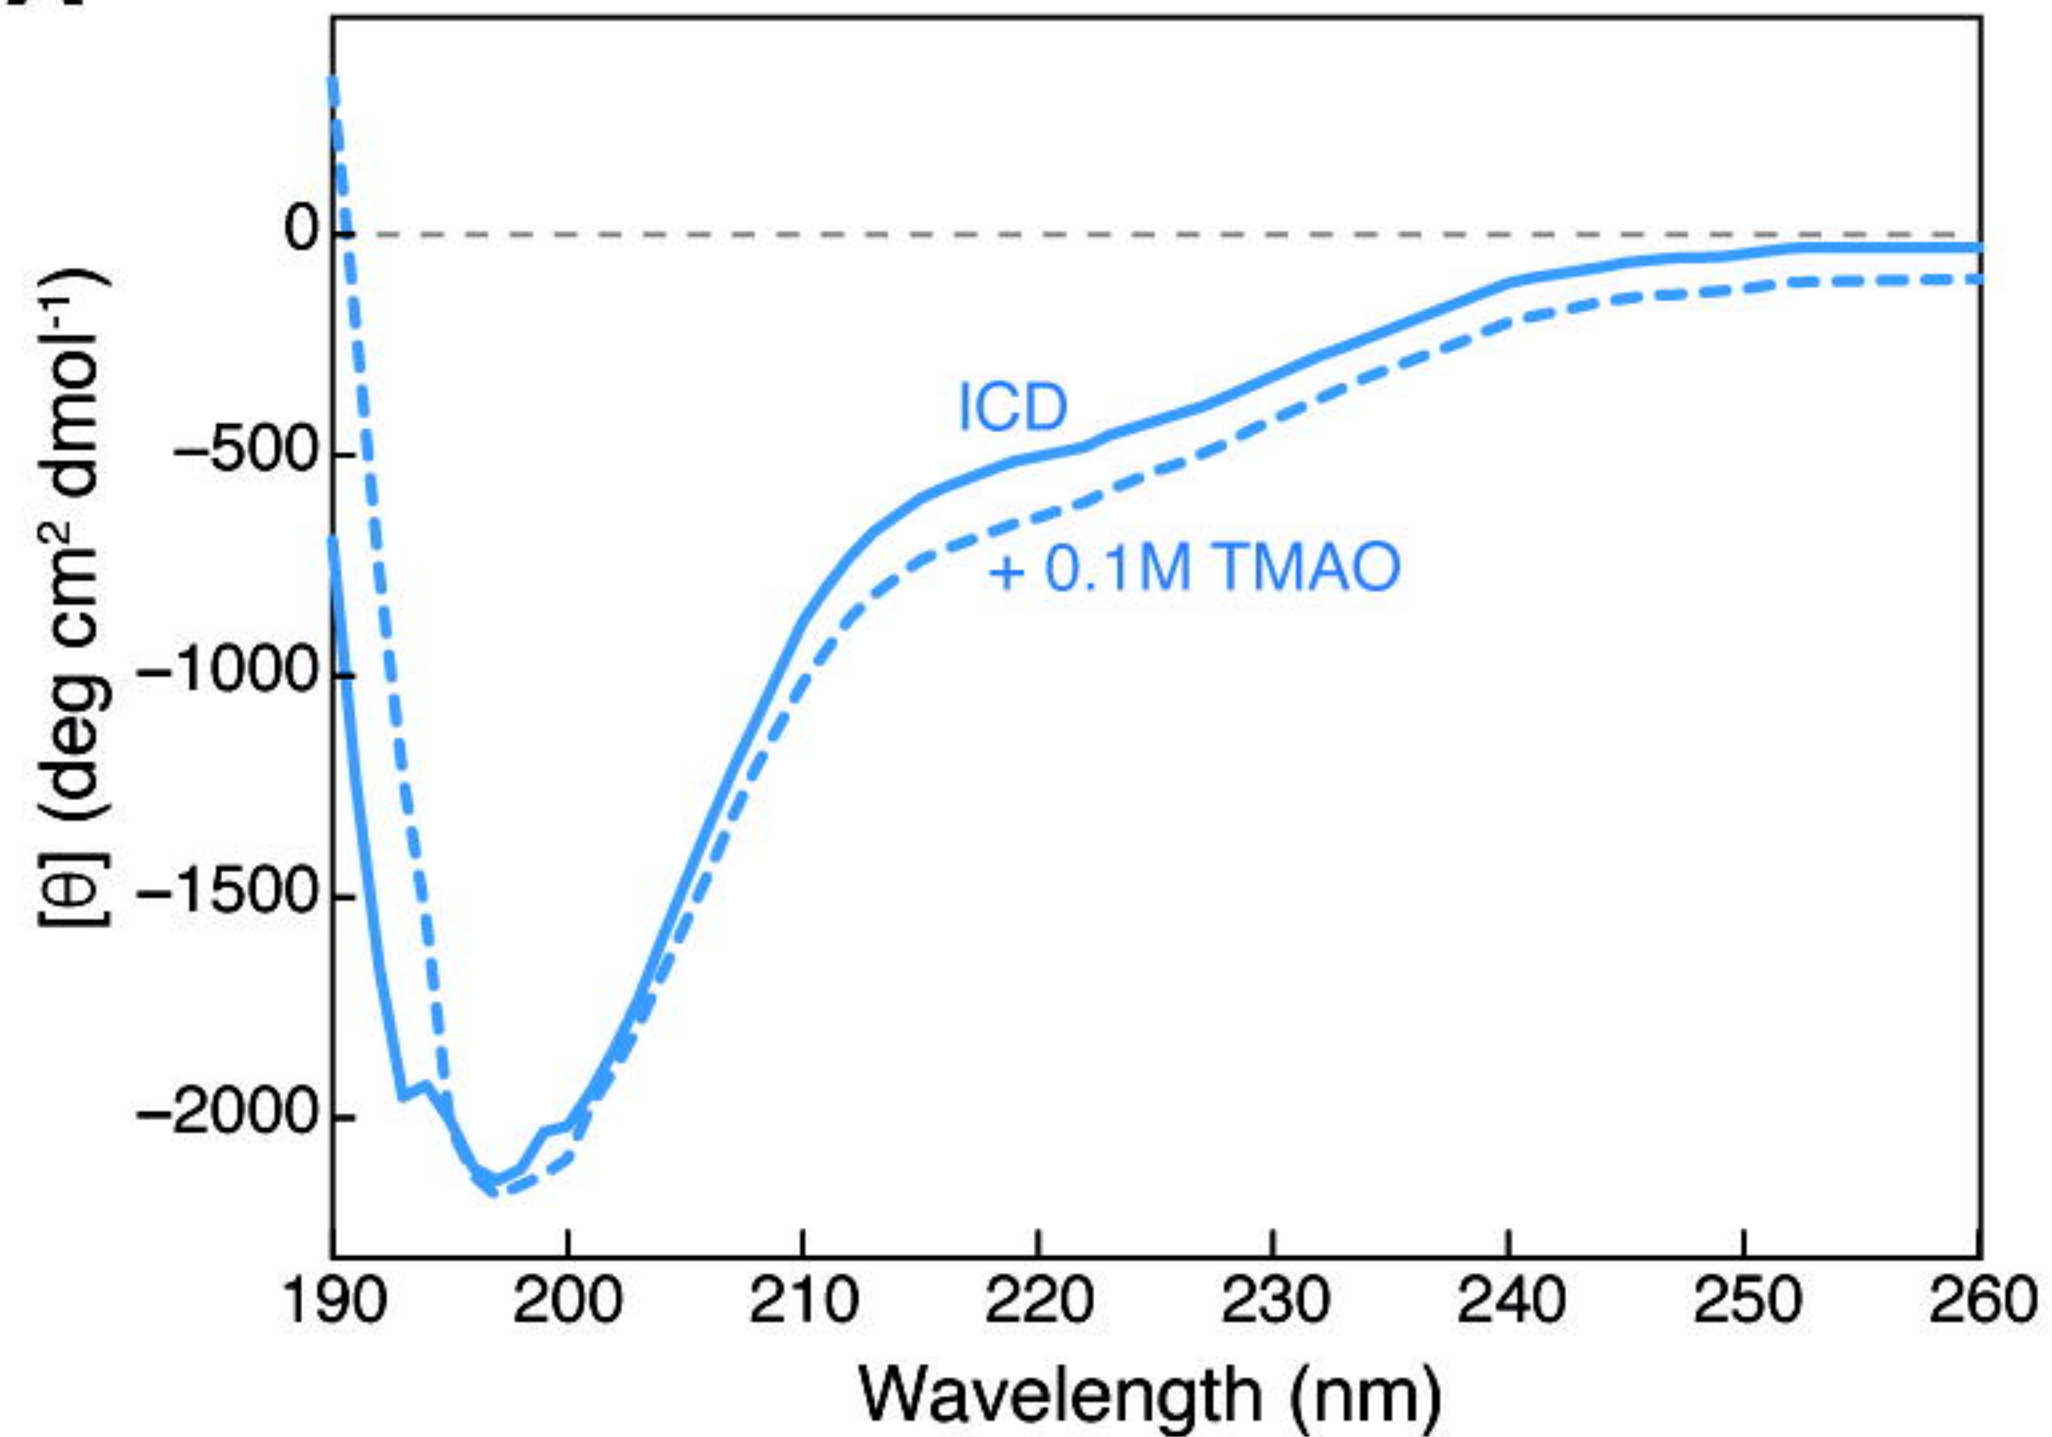**B**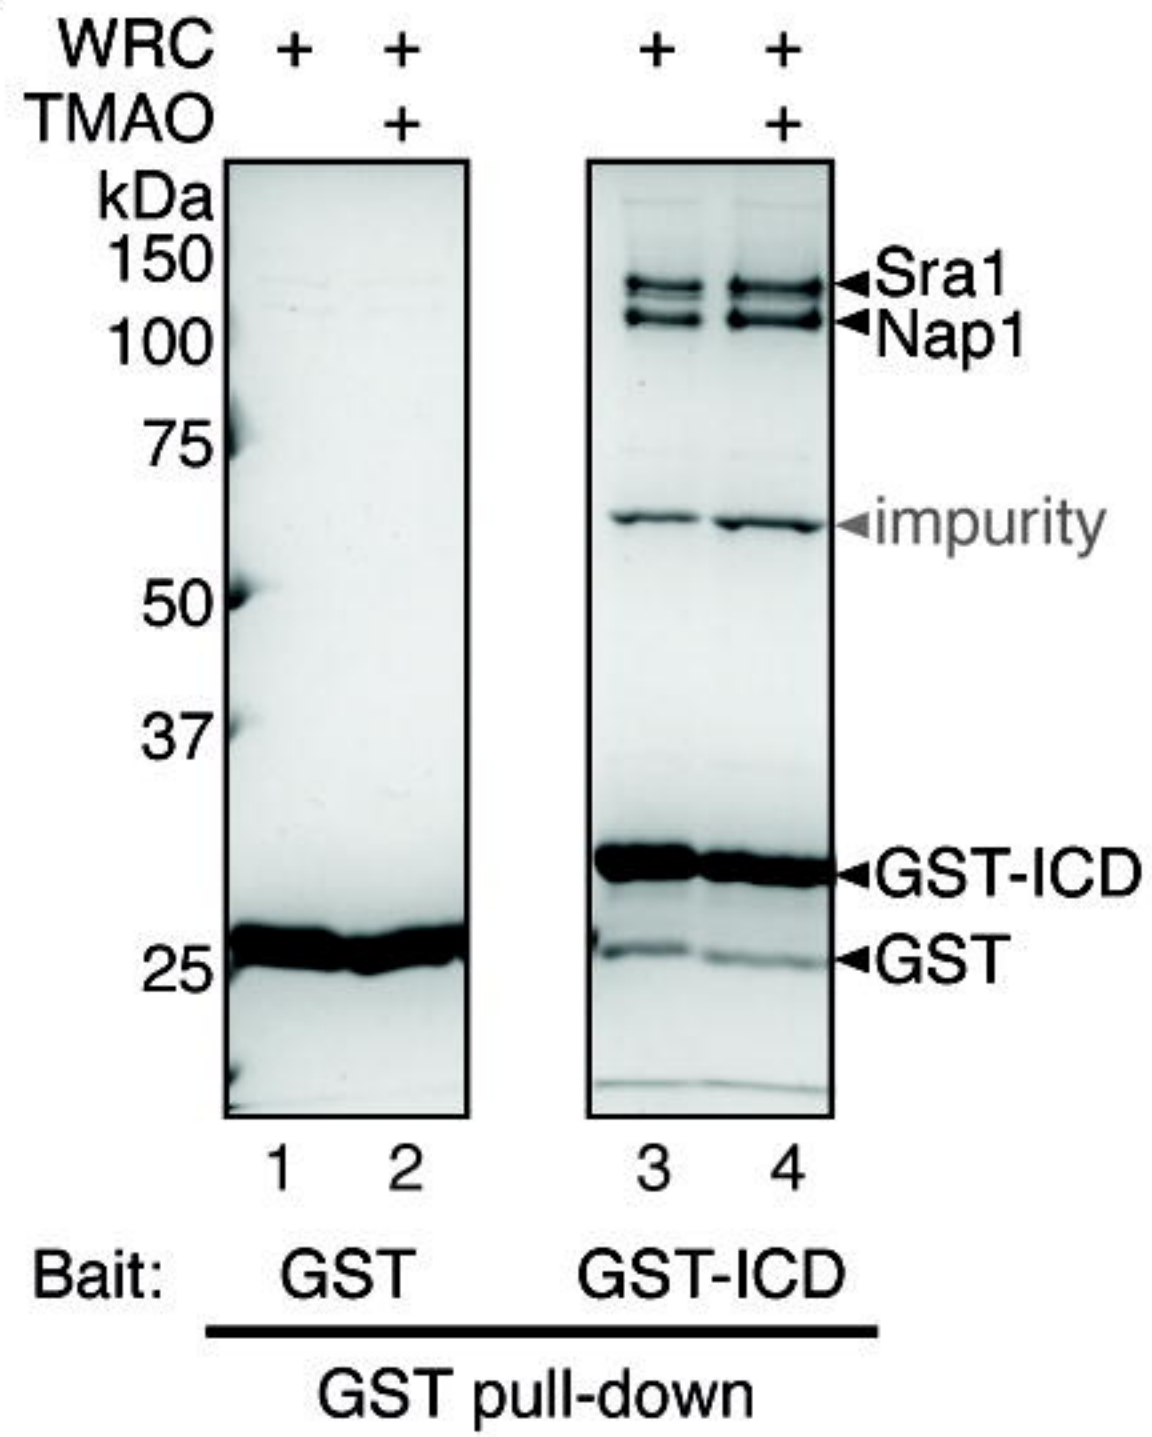**C**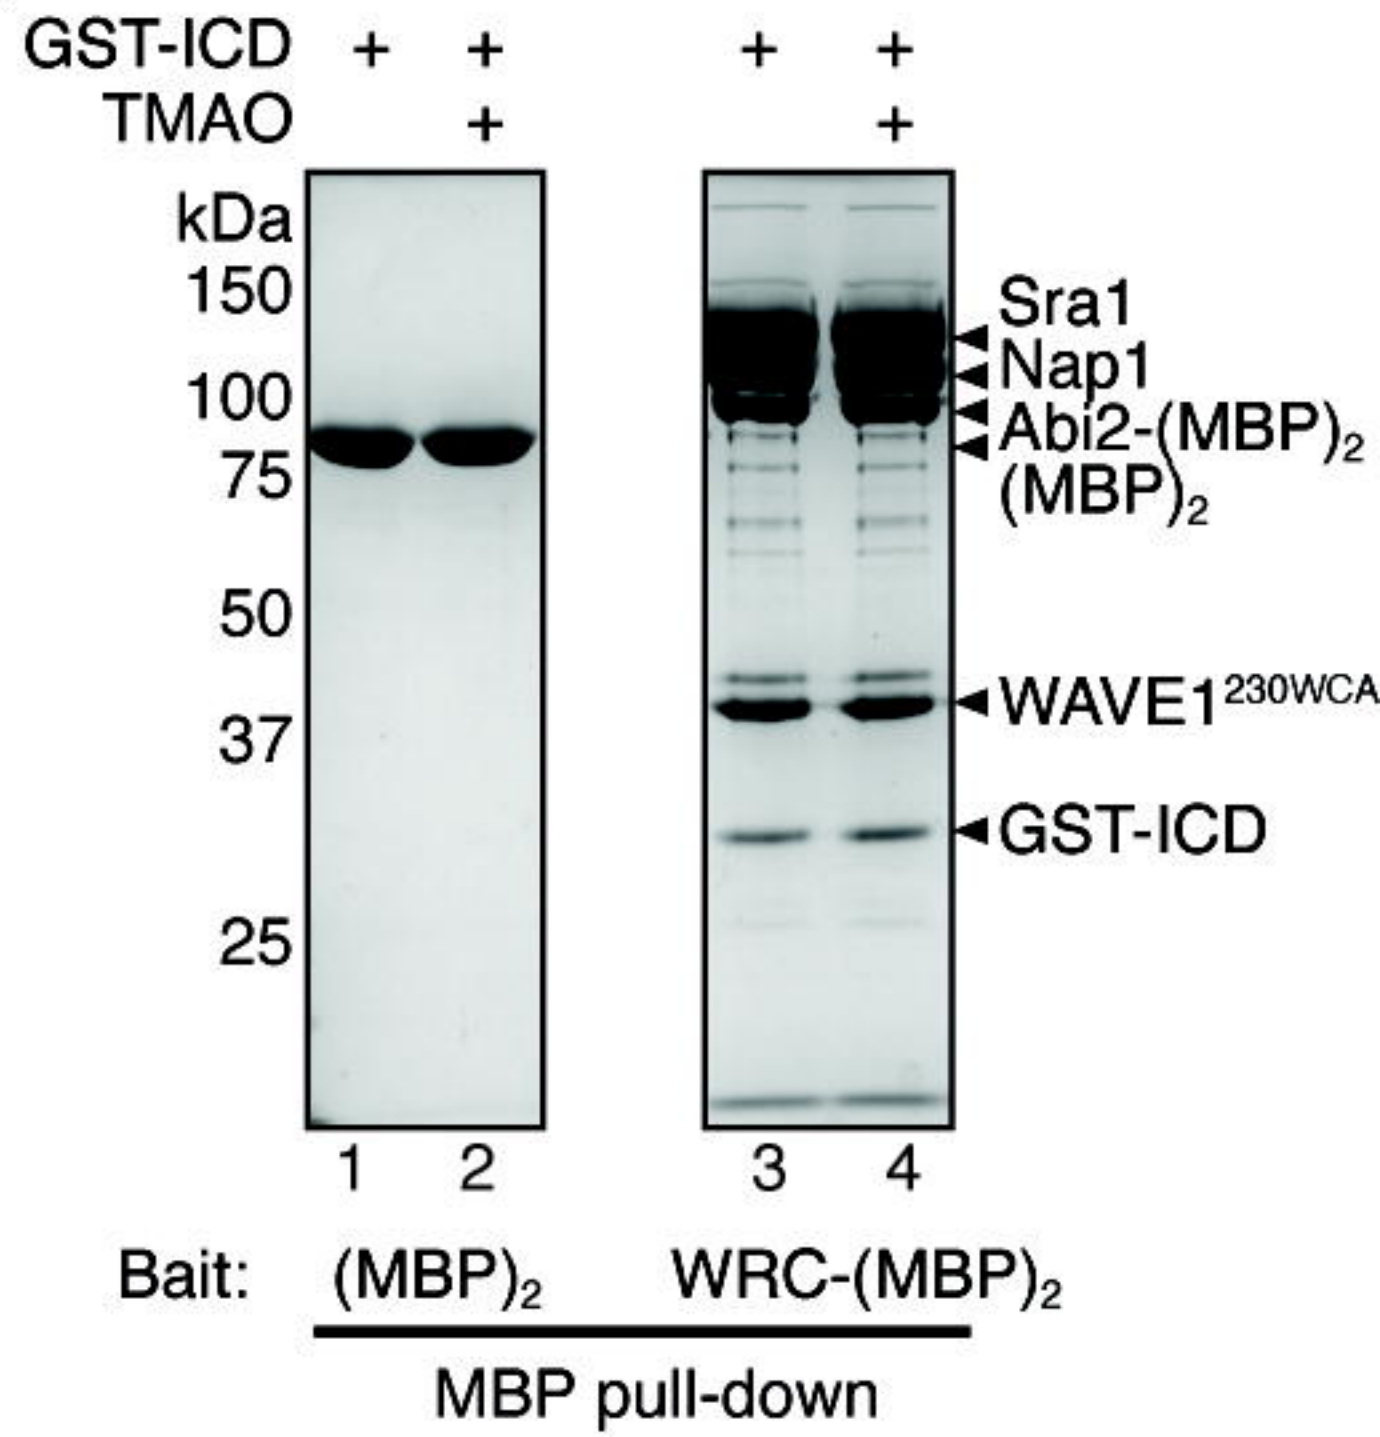



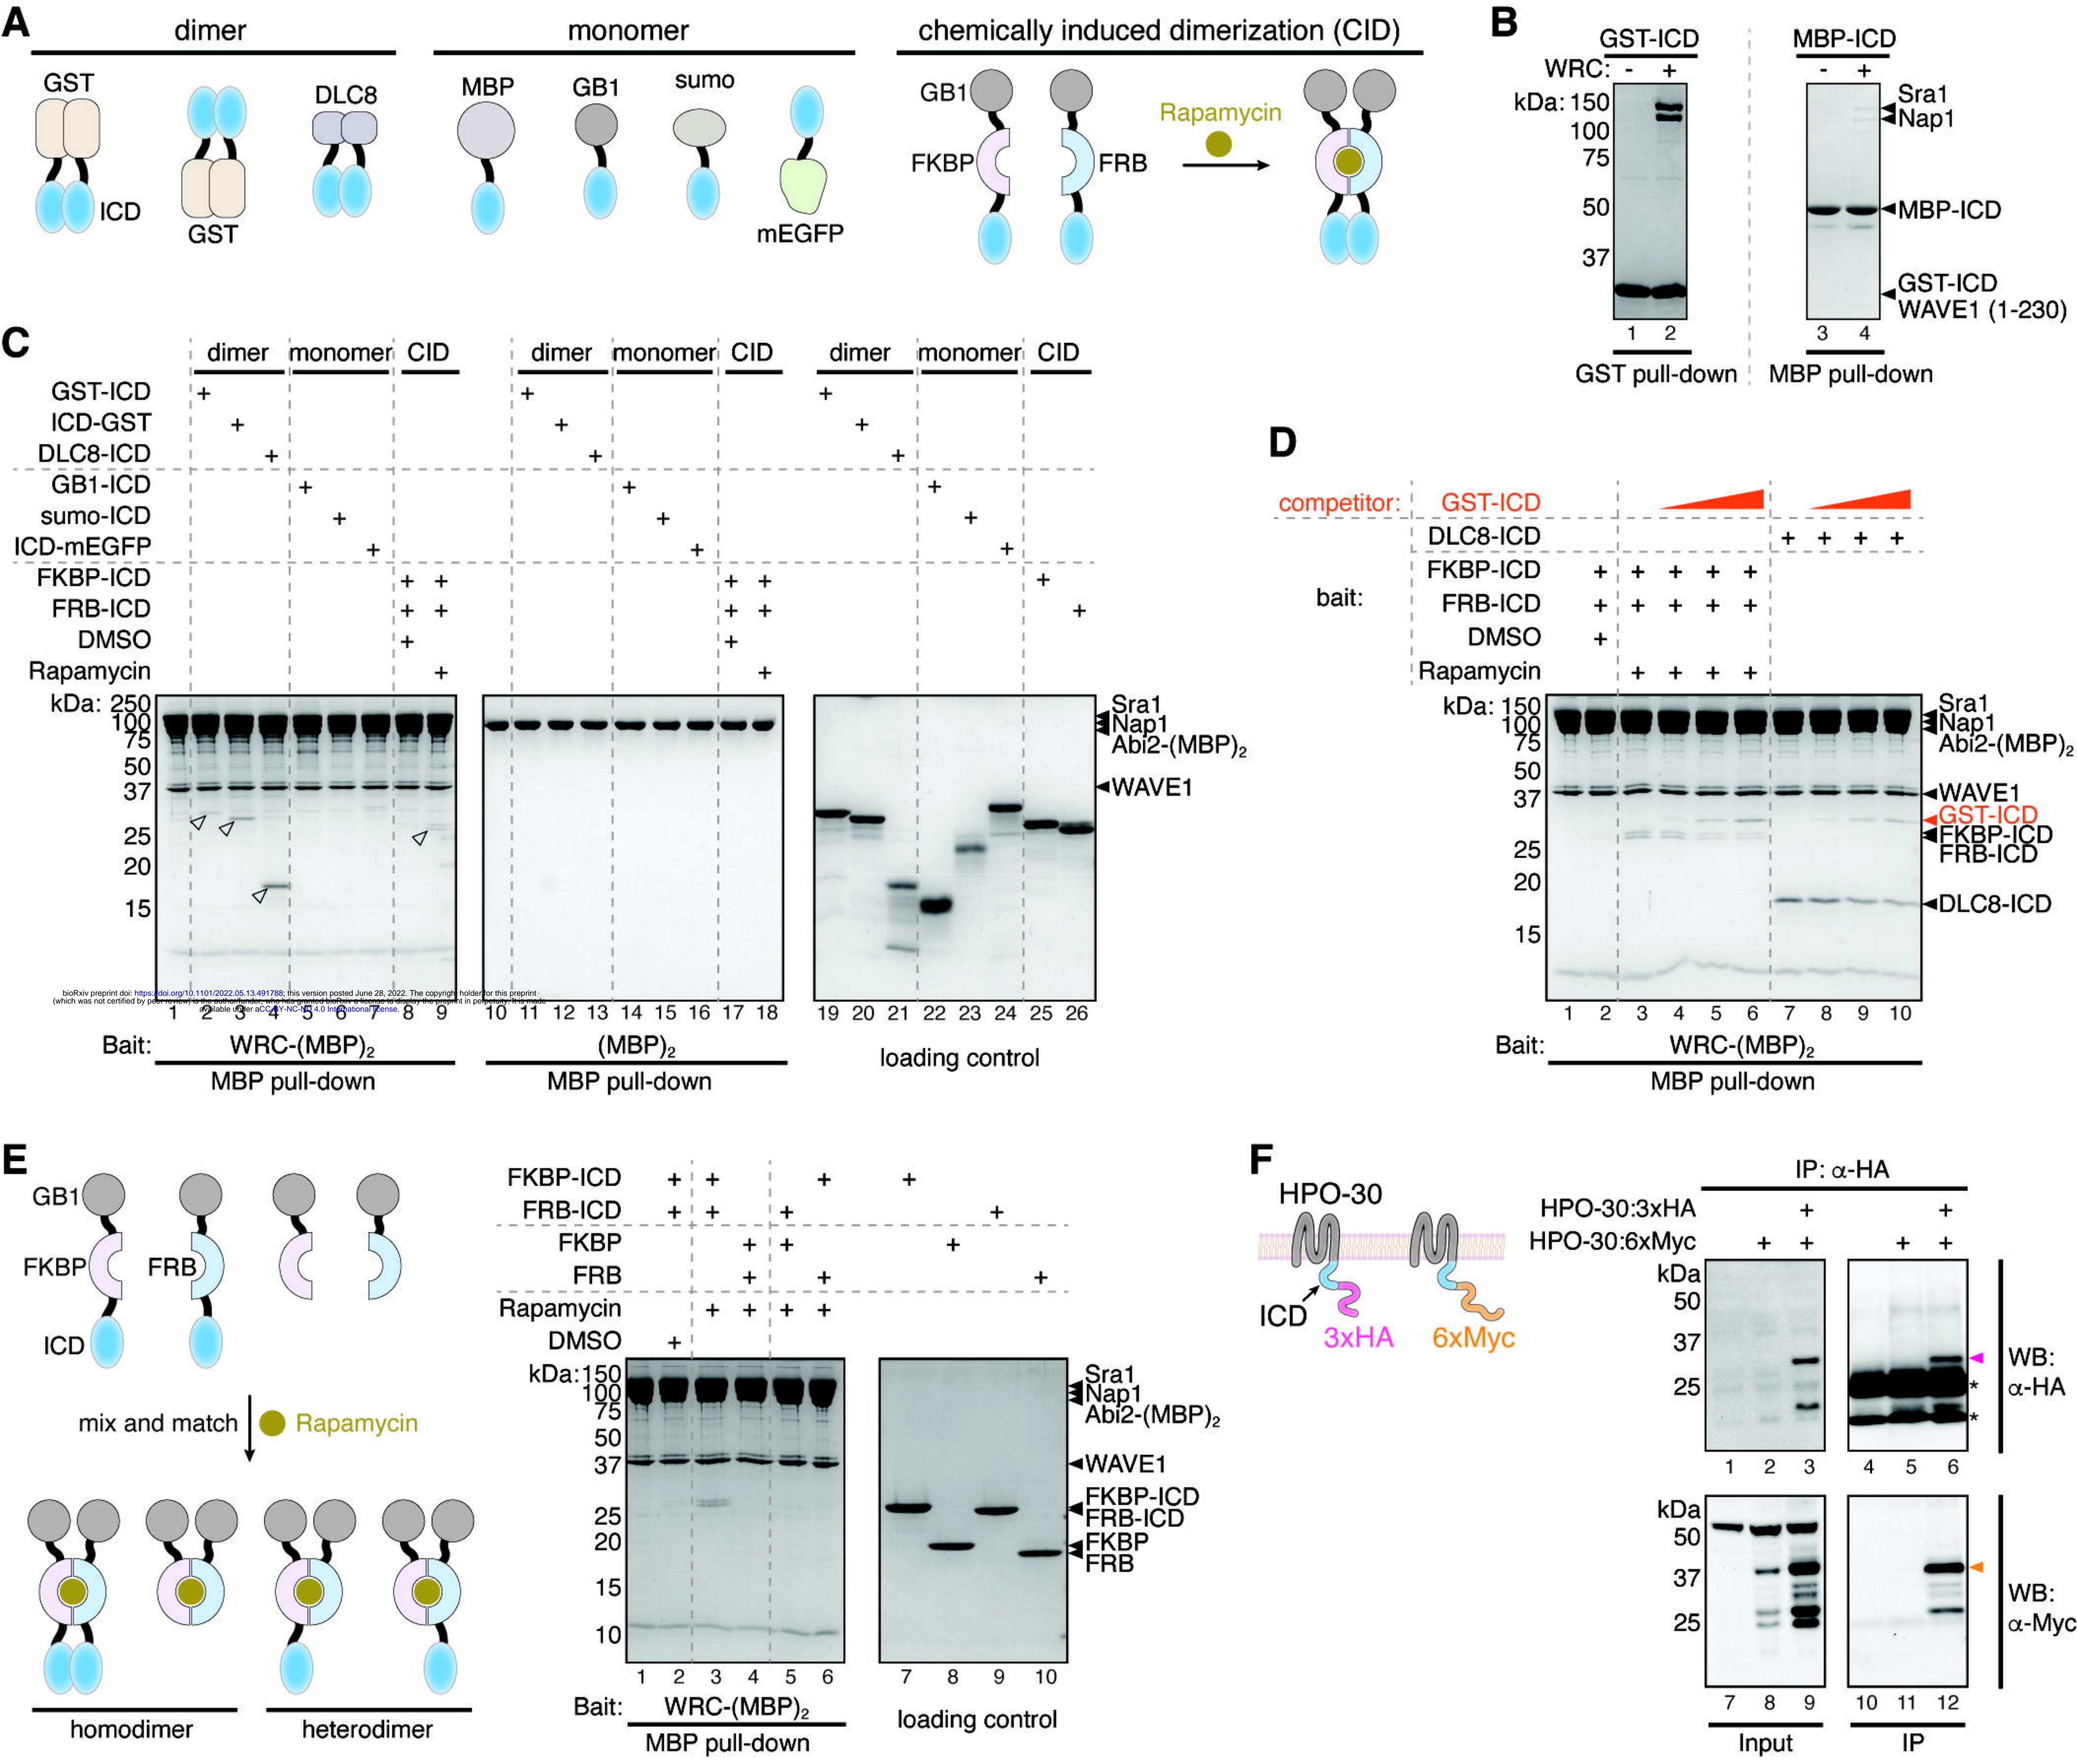



**A**

ICD peptide:

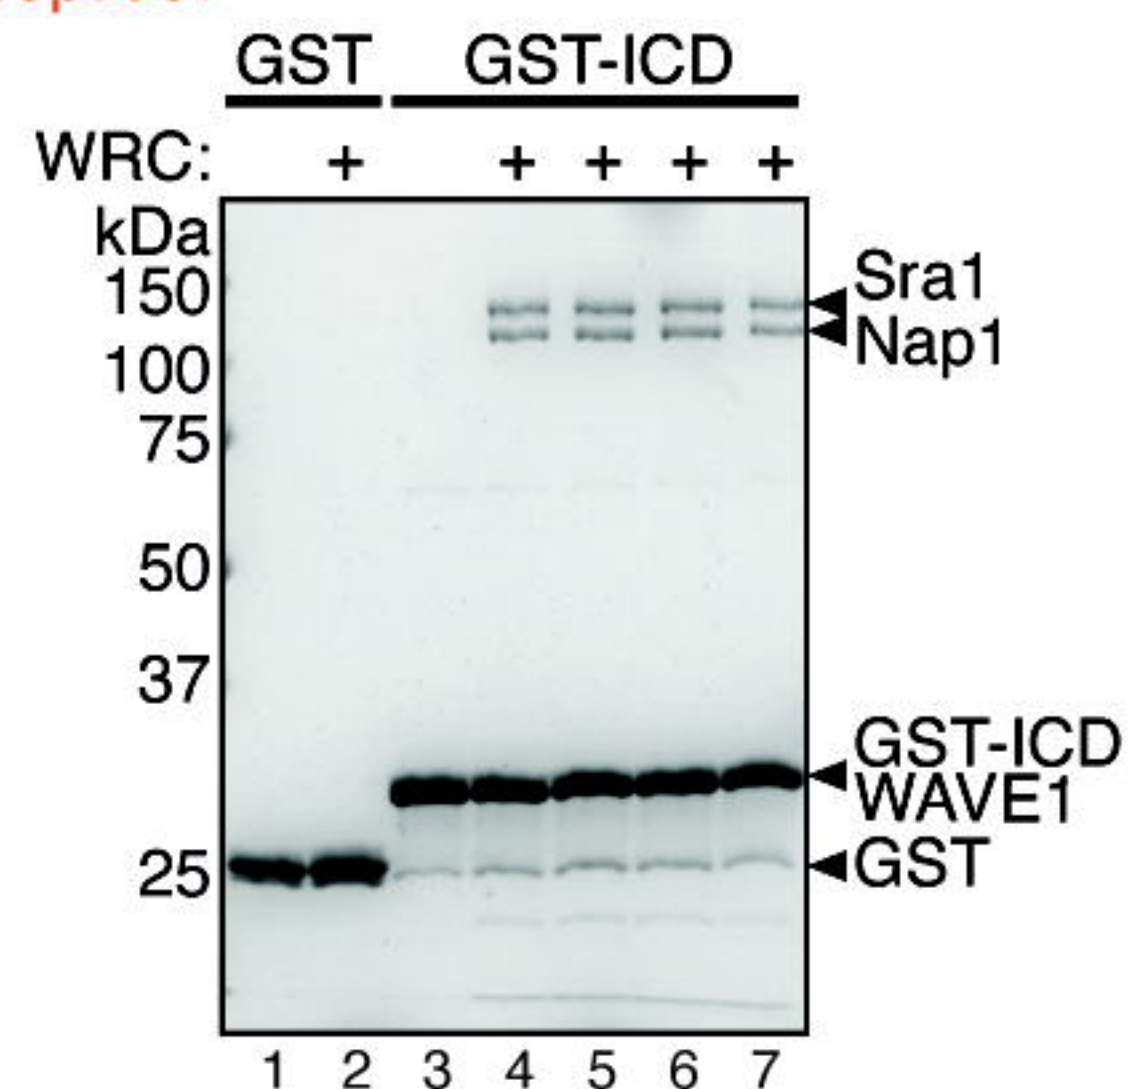**B**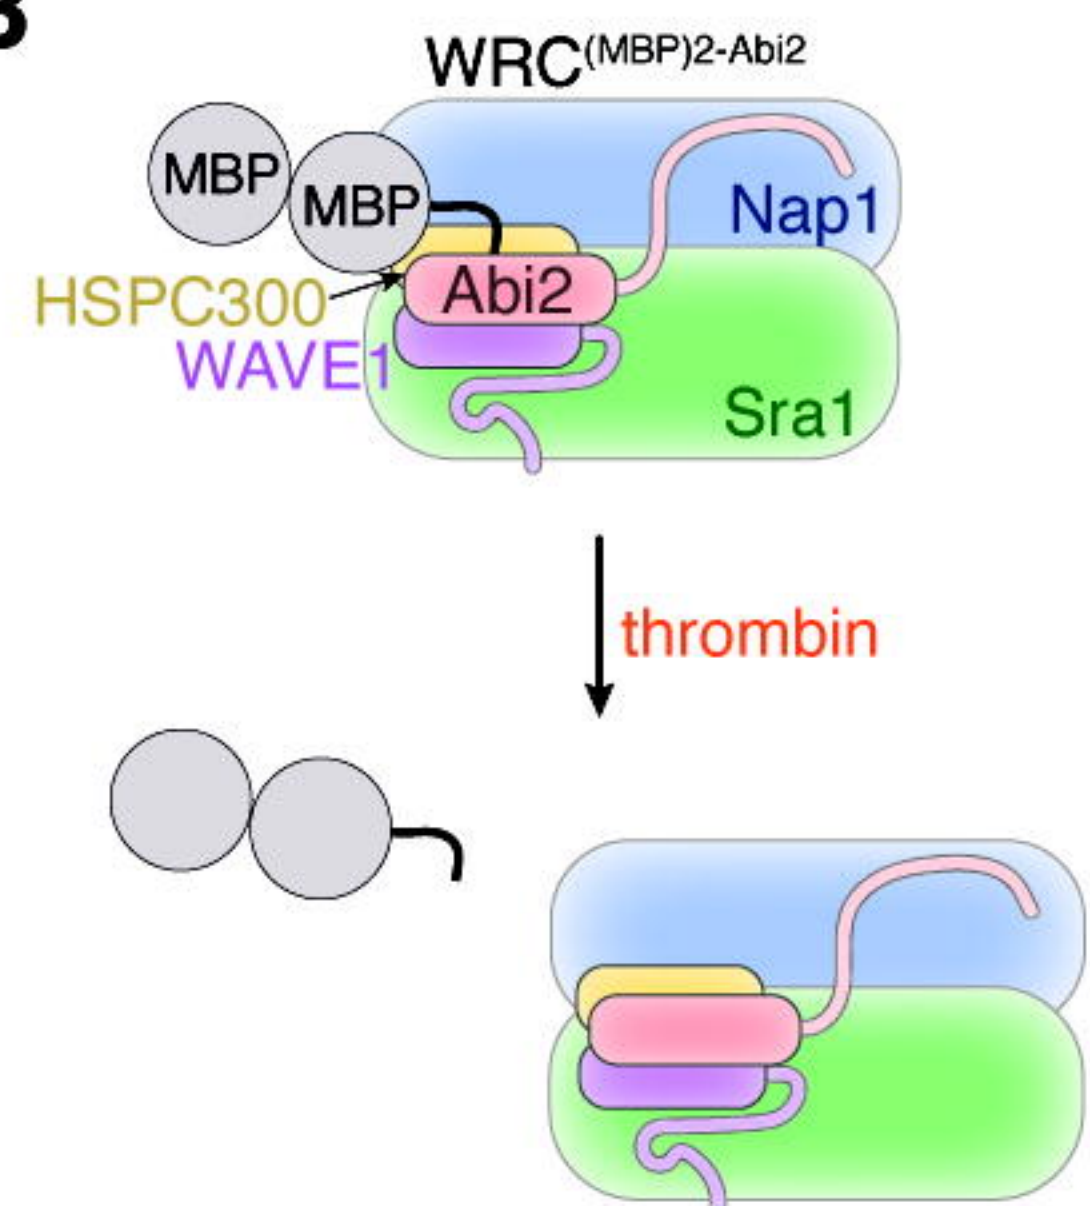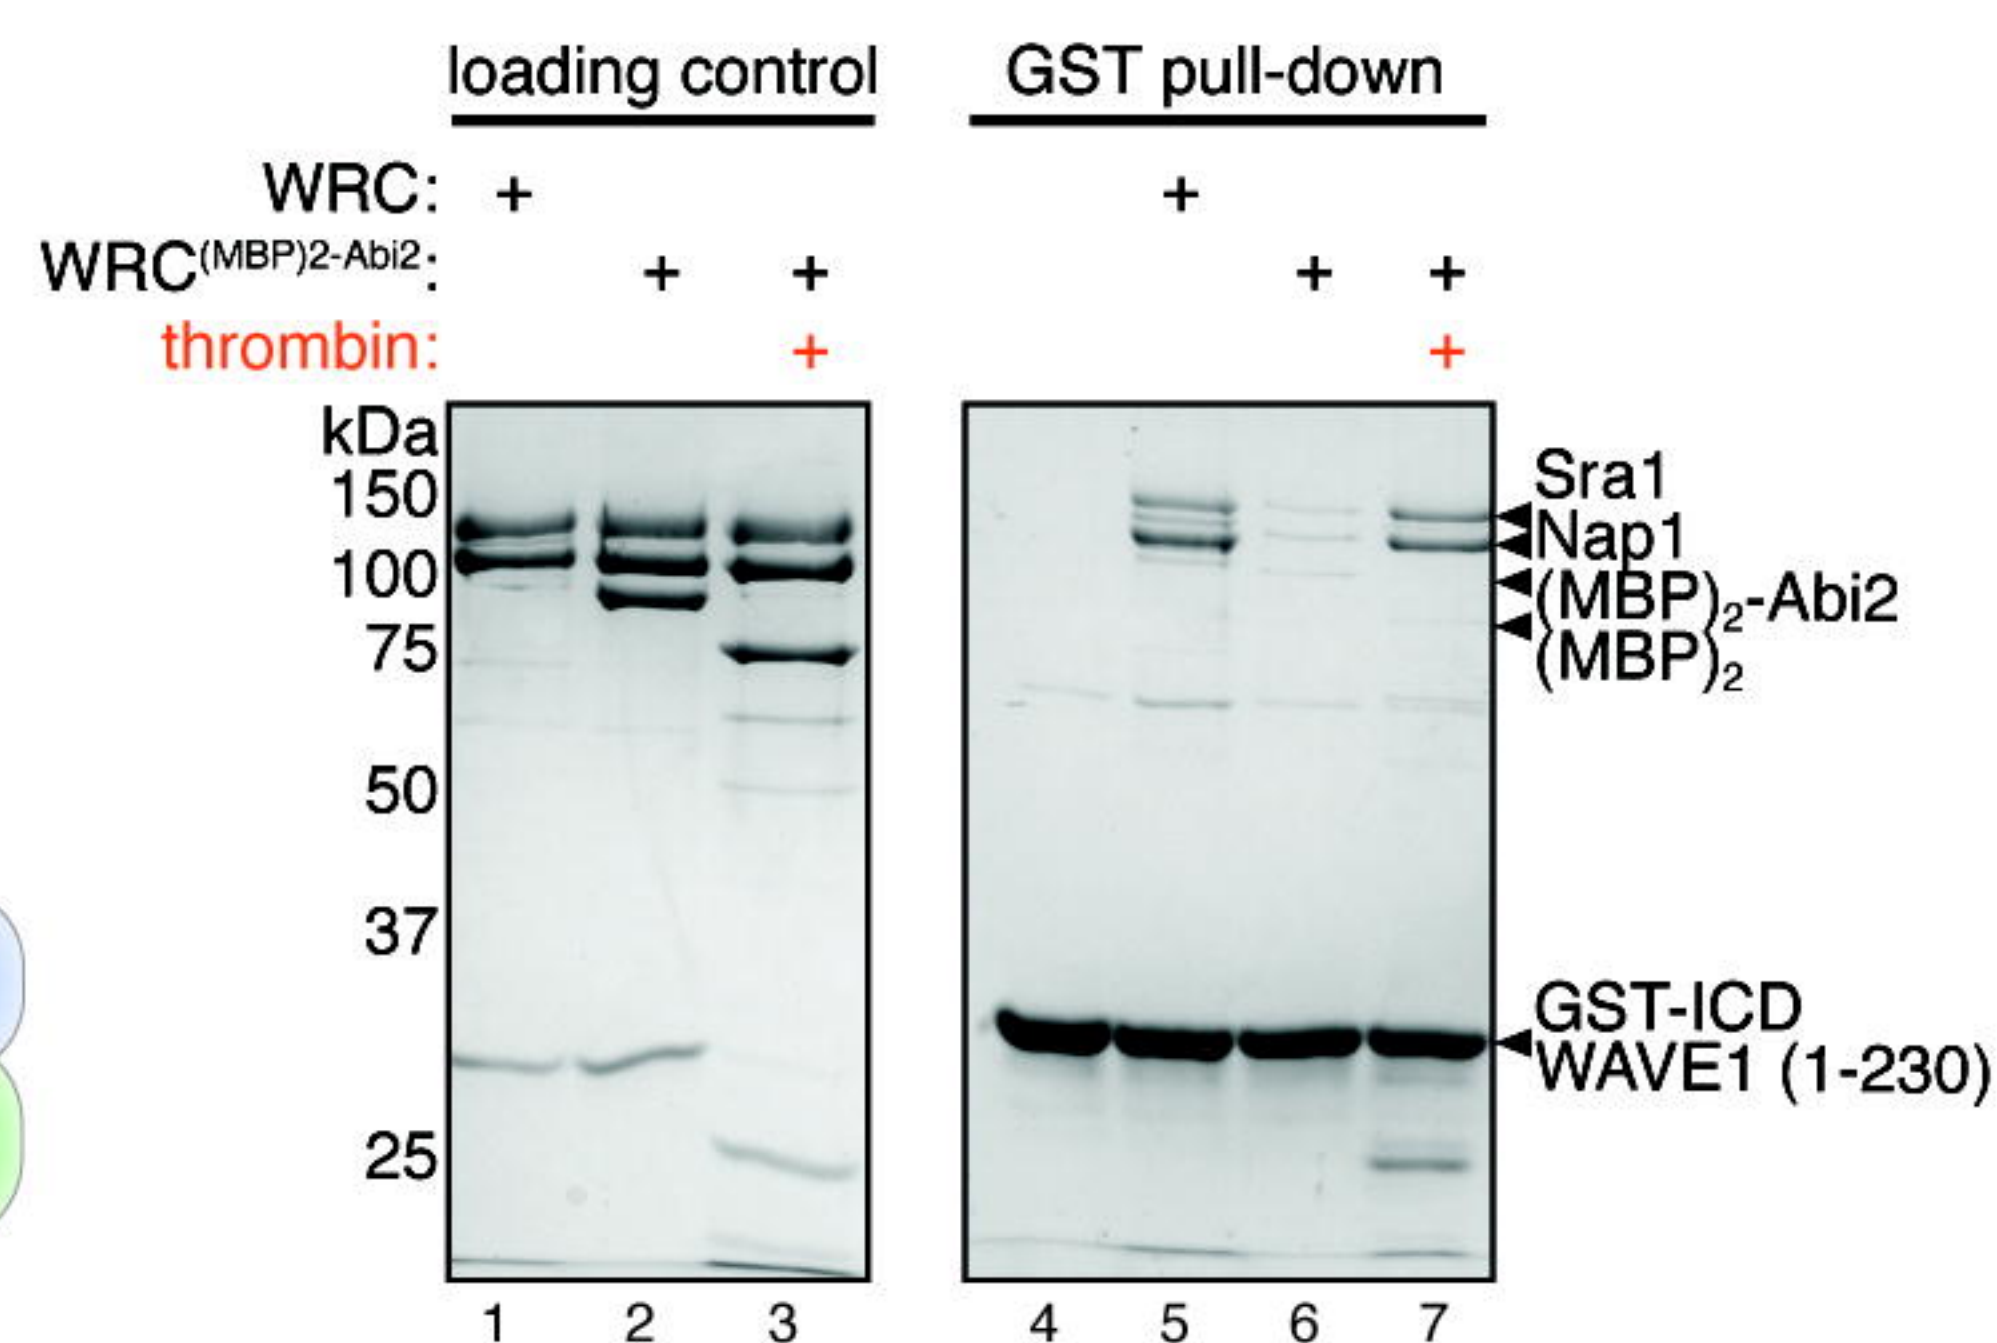**C**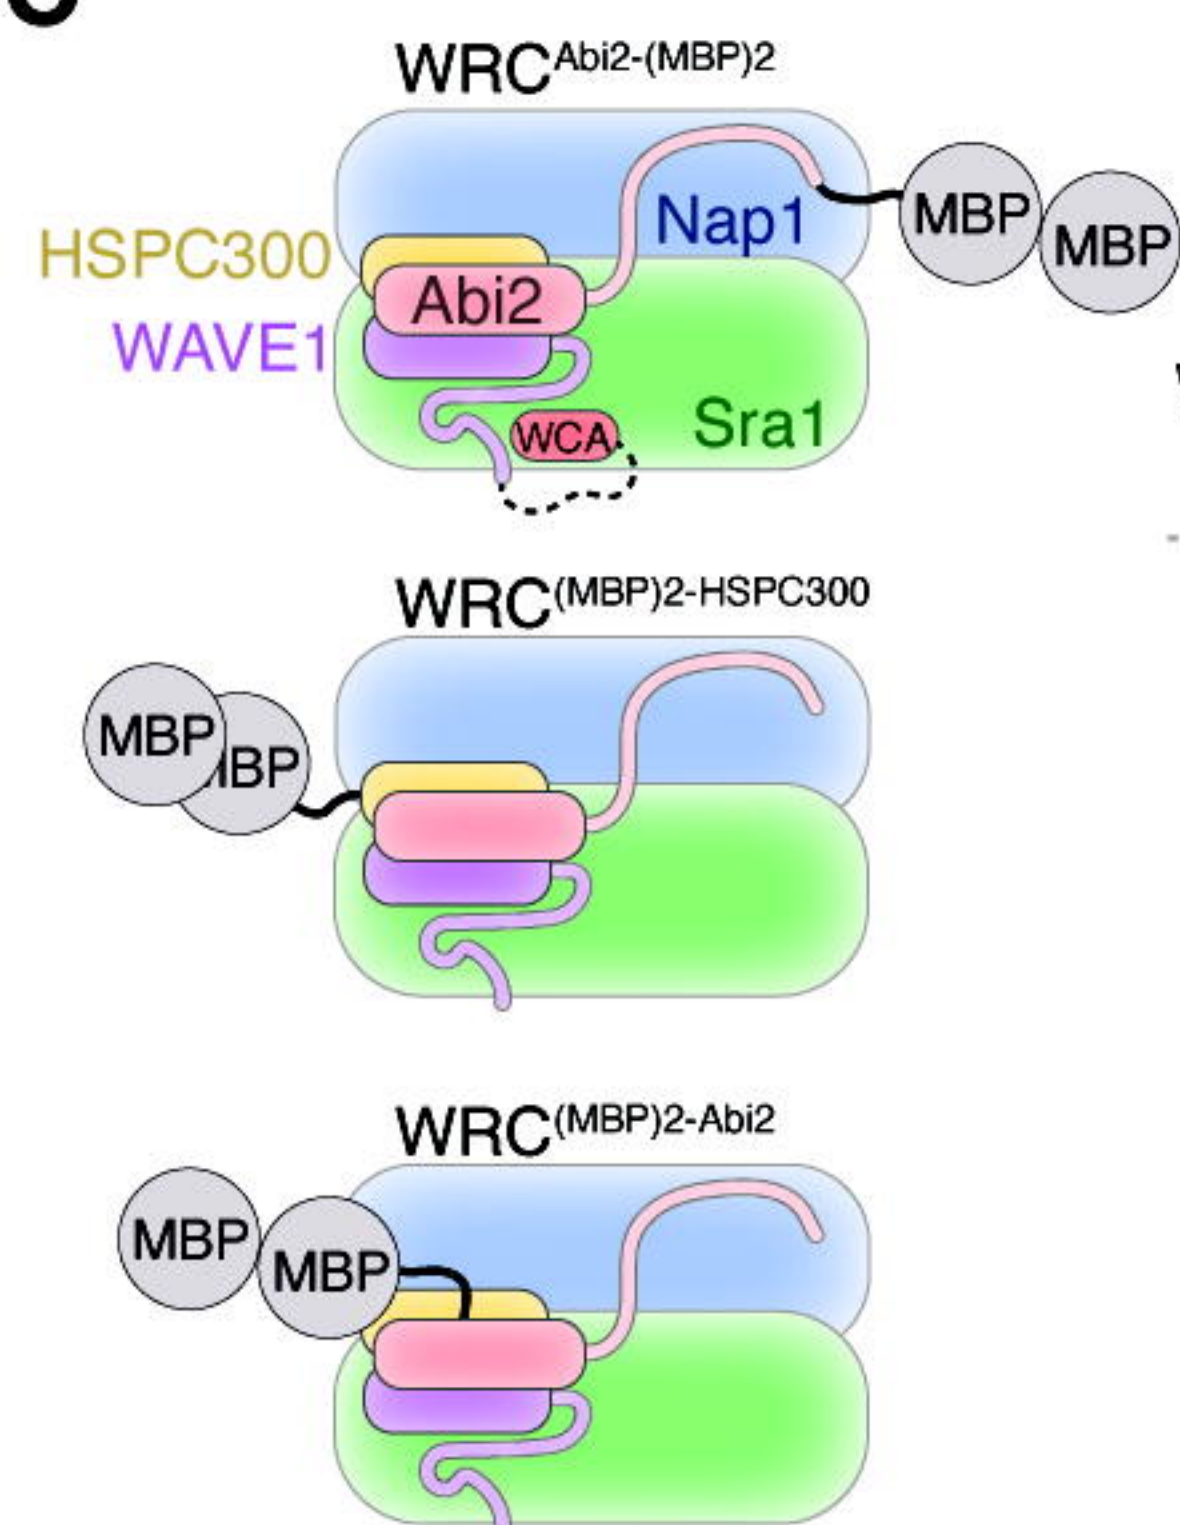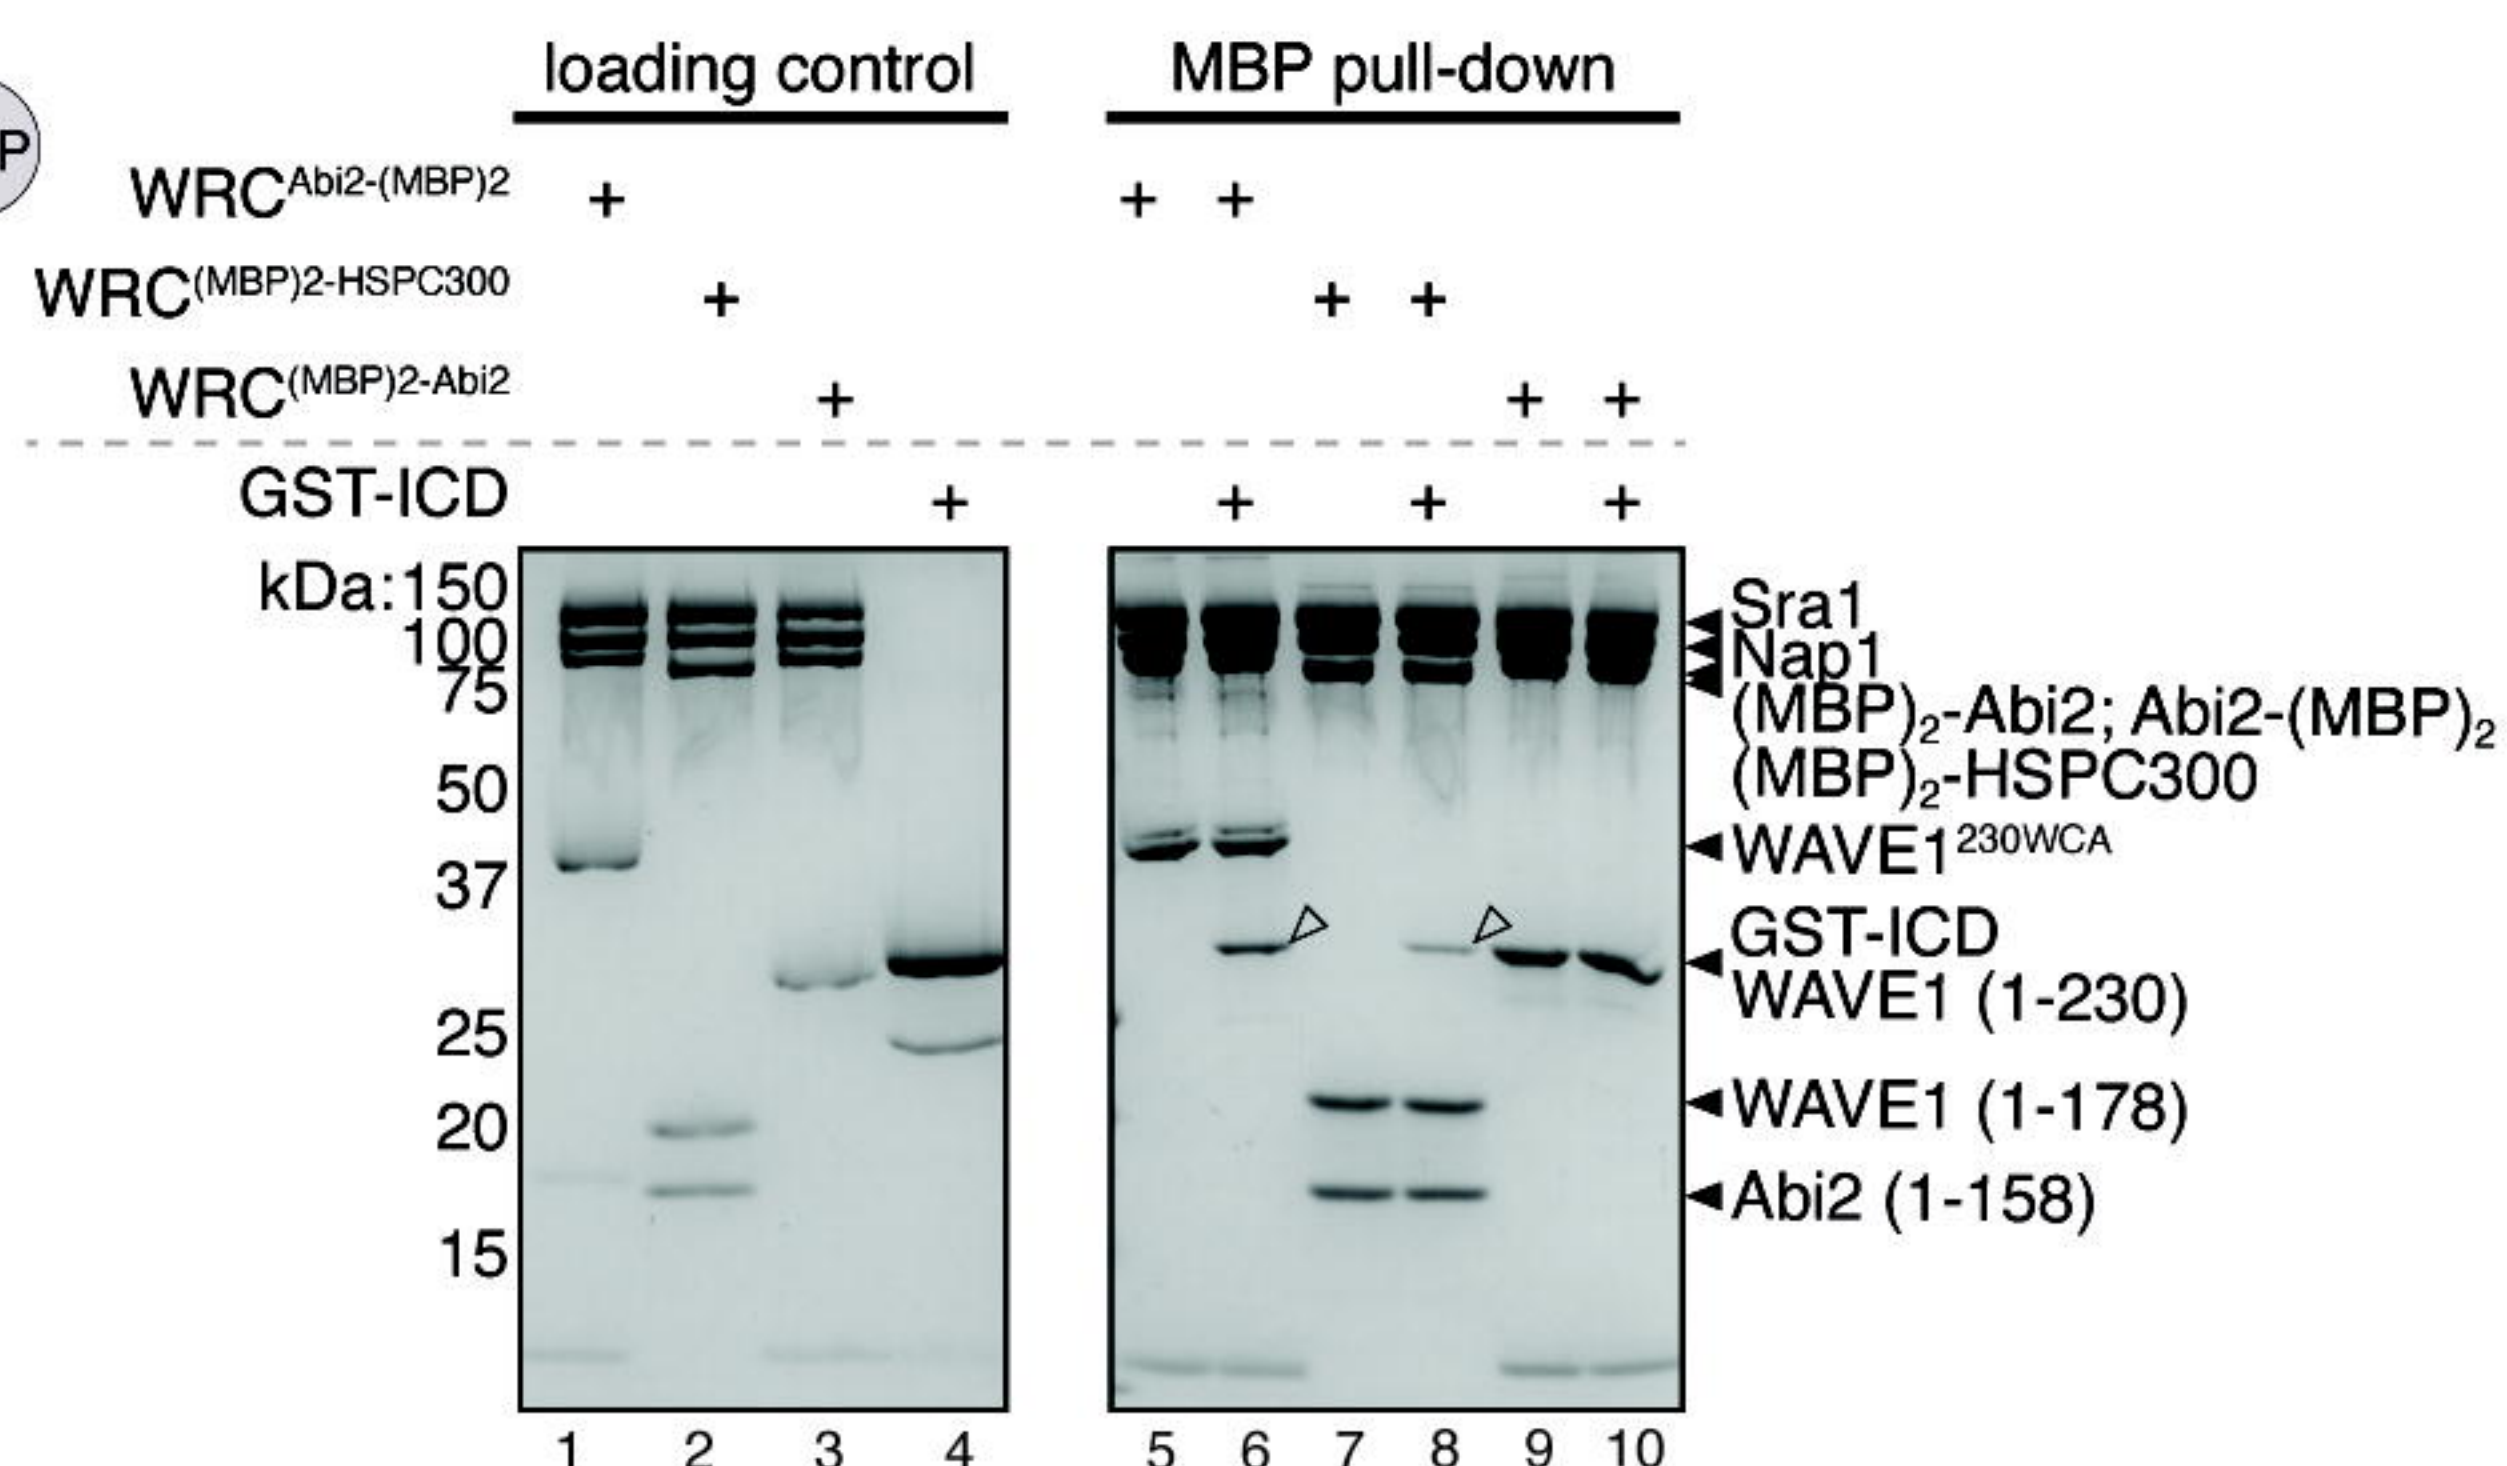**D**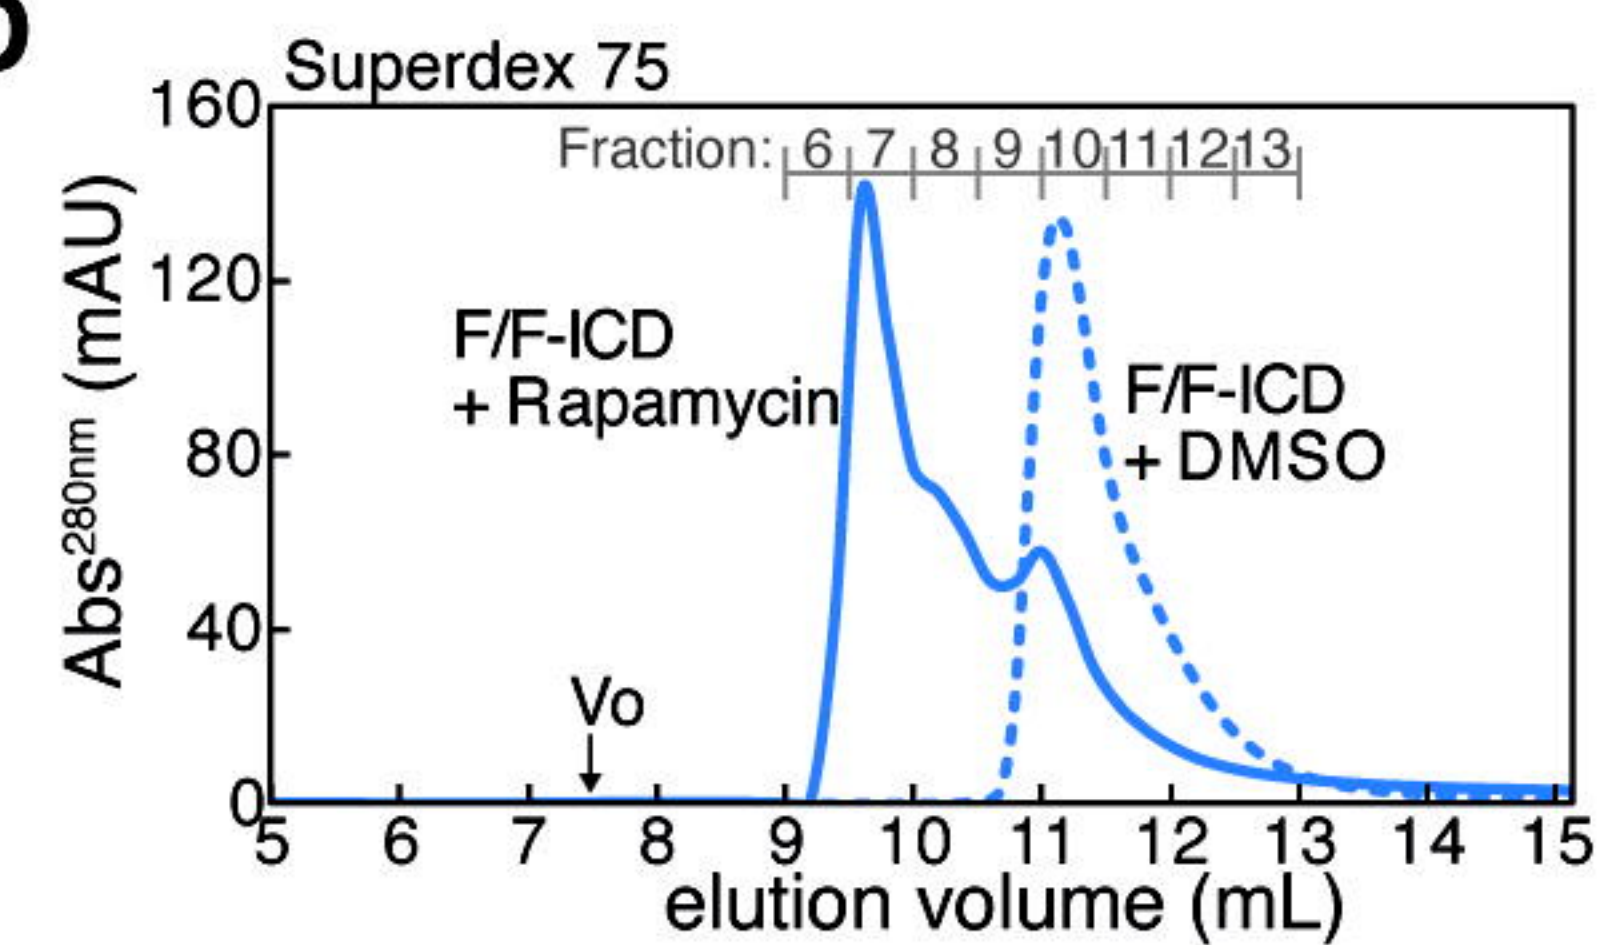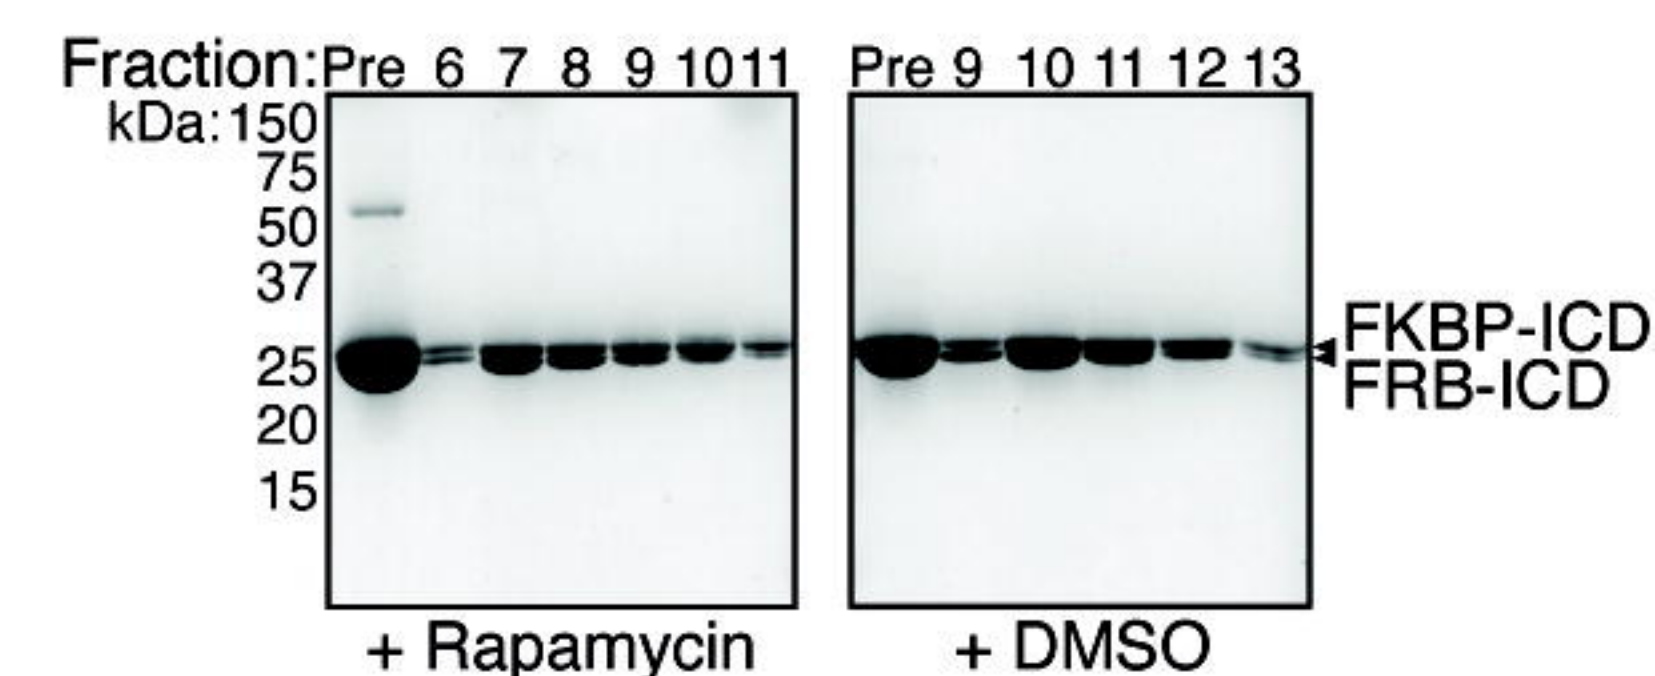**E**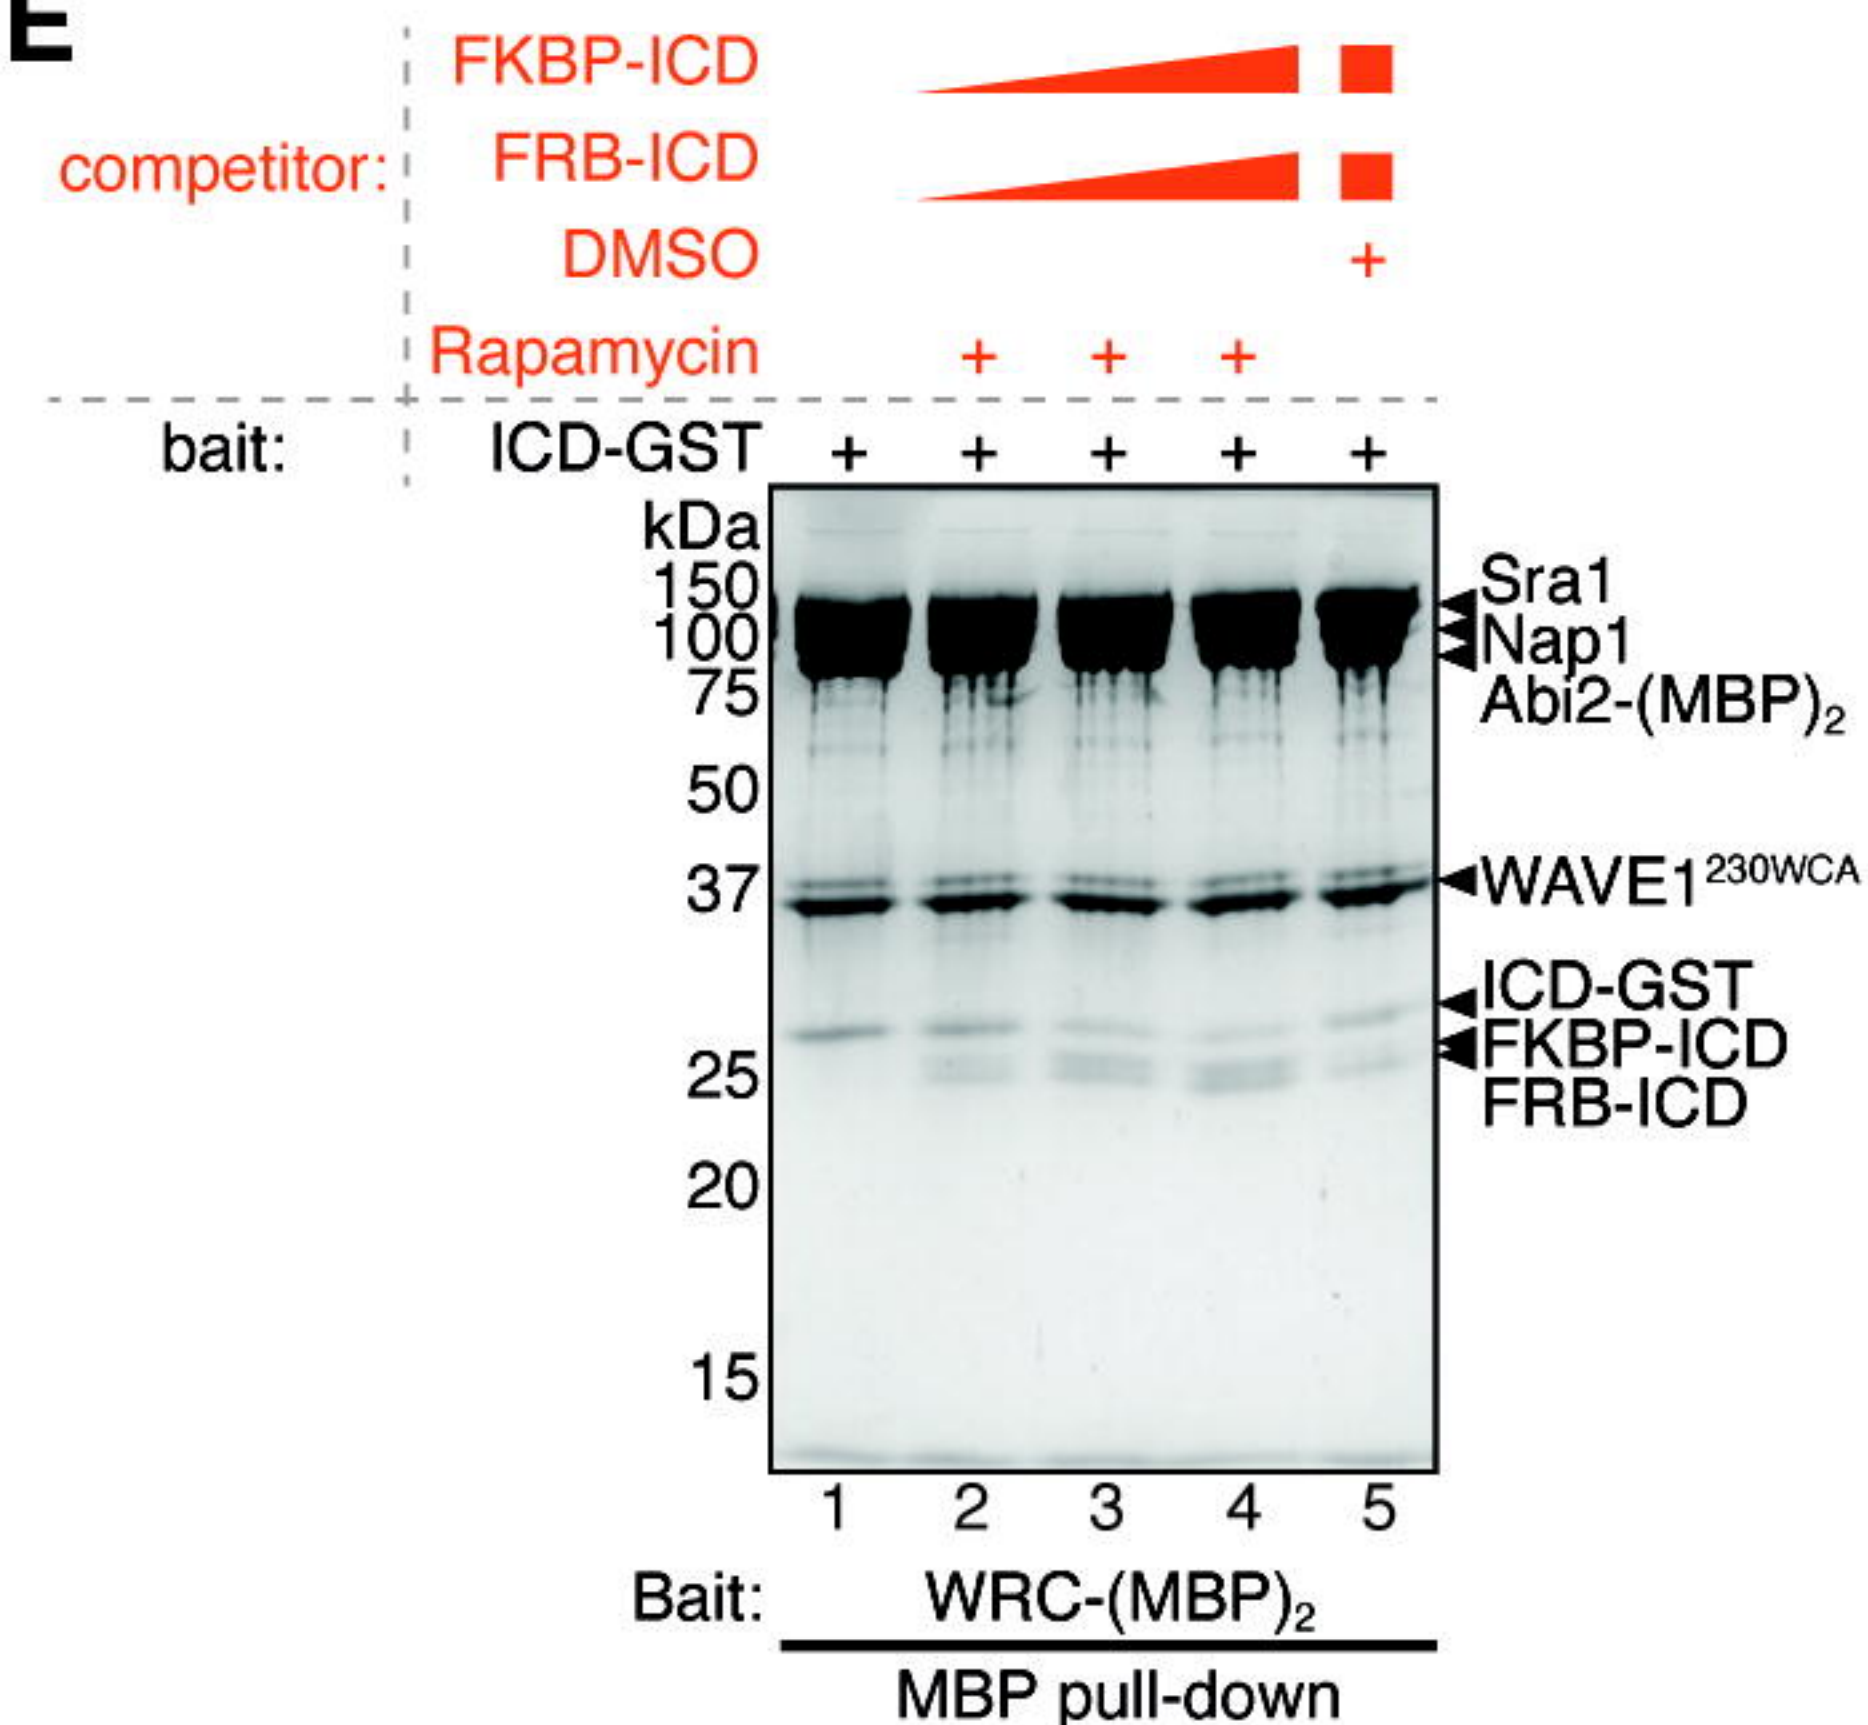**F**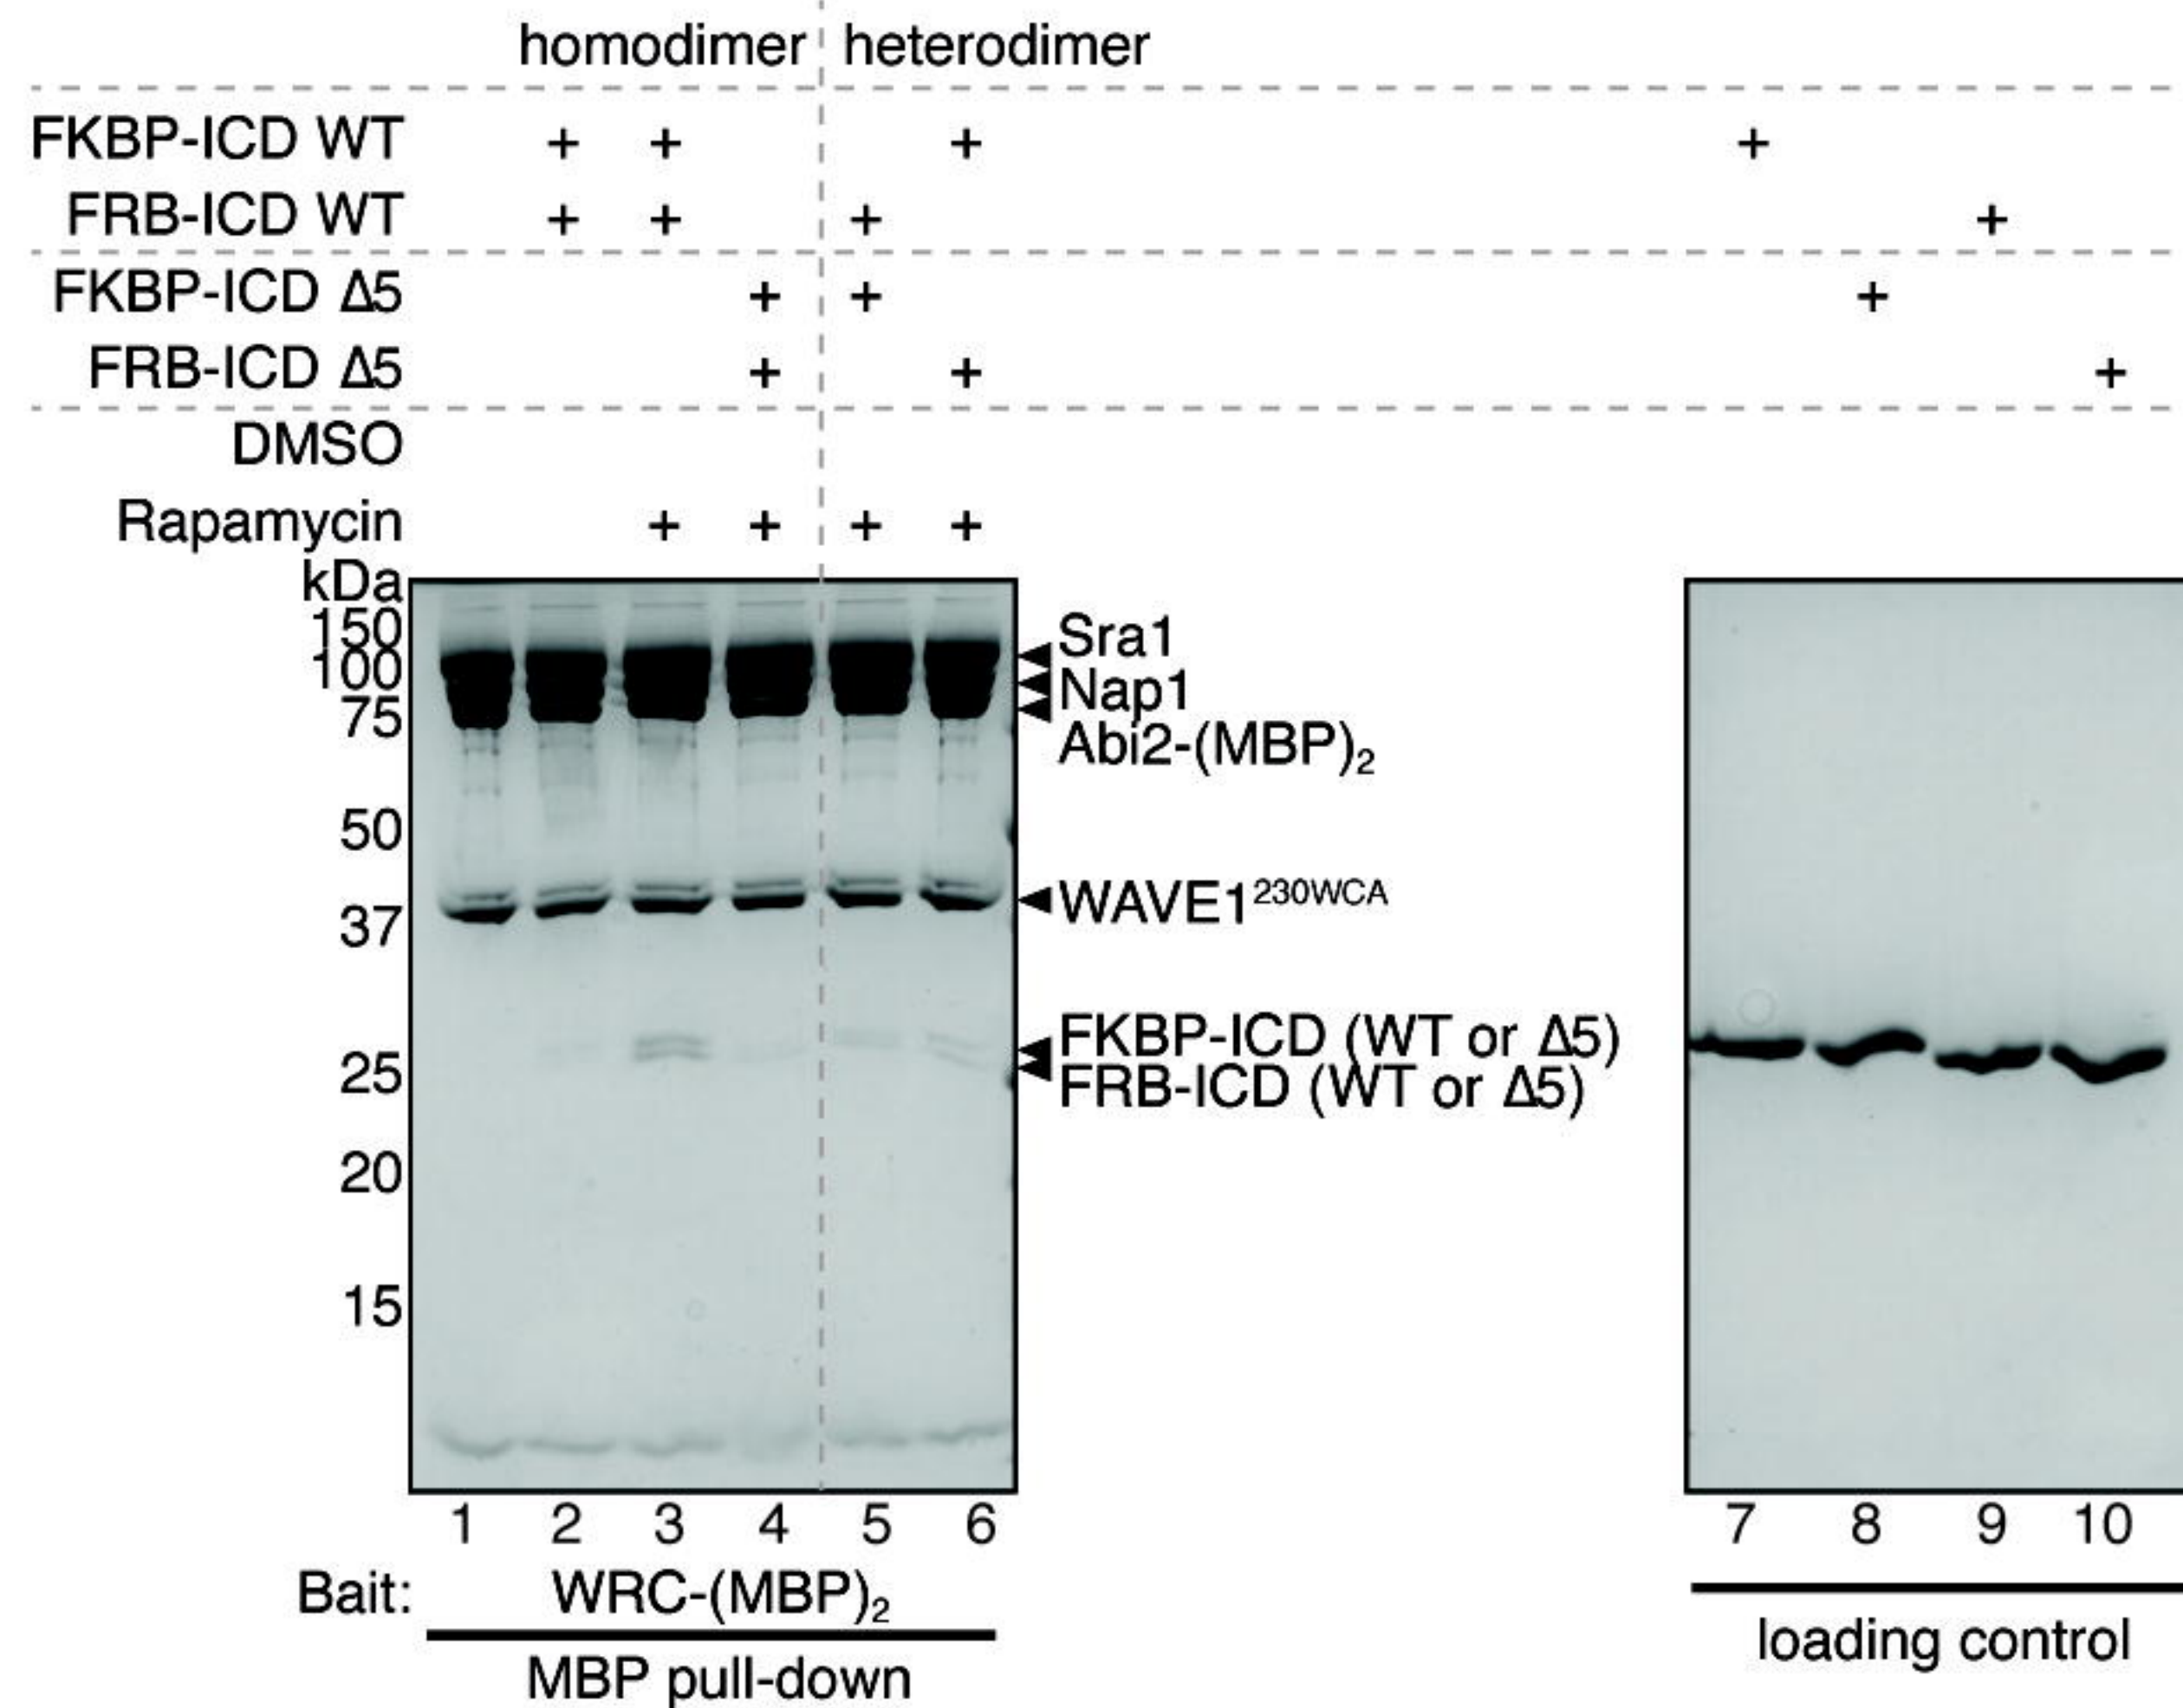



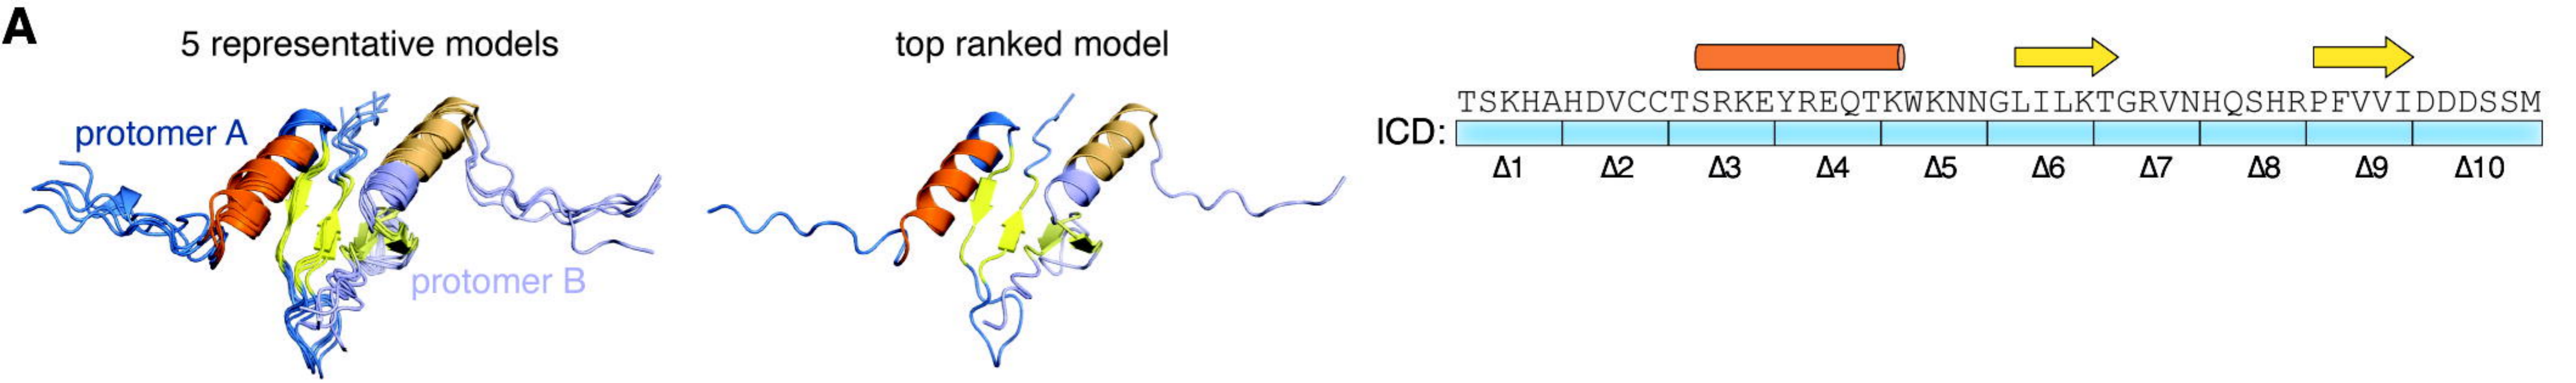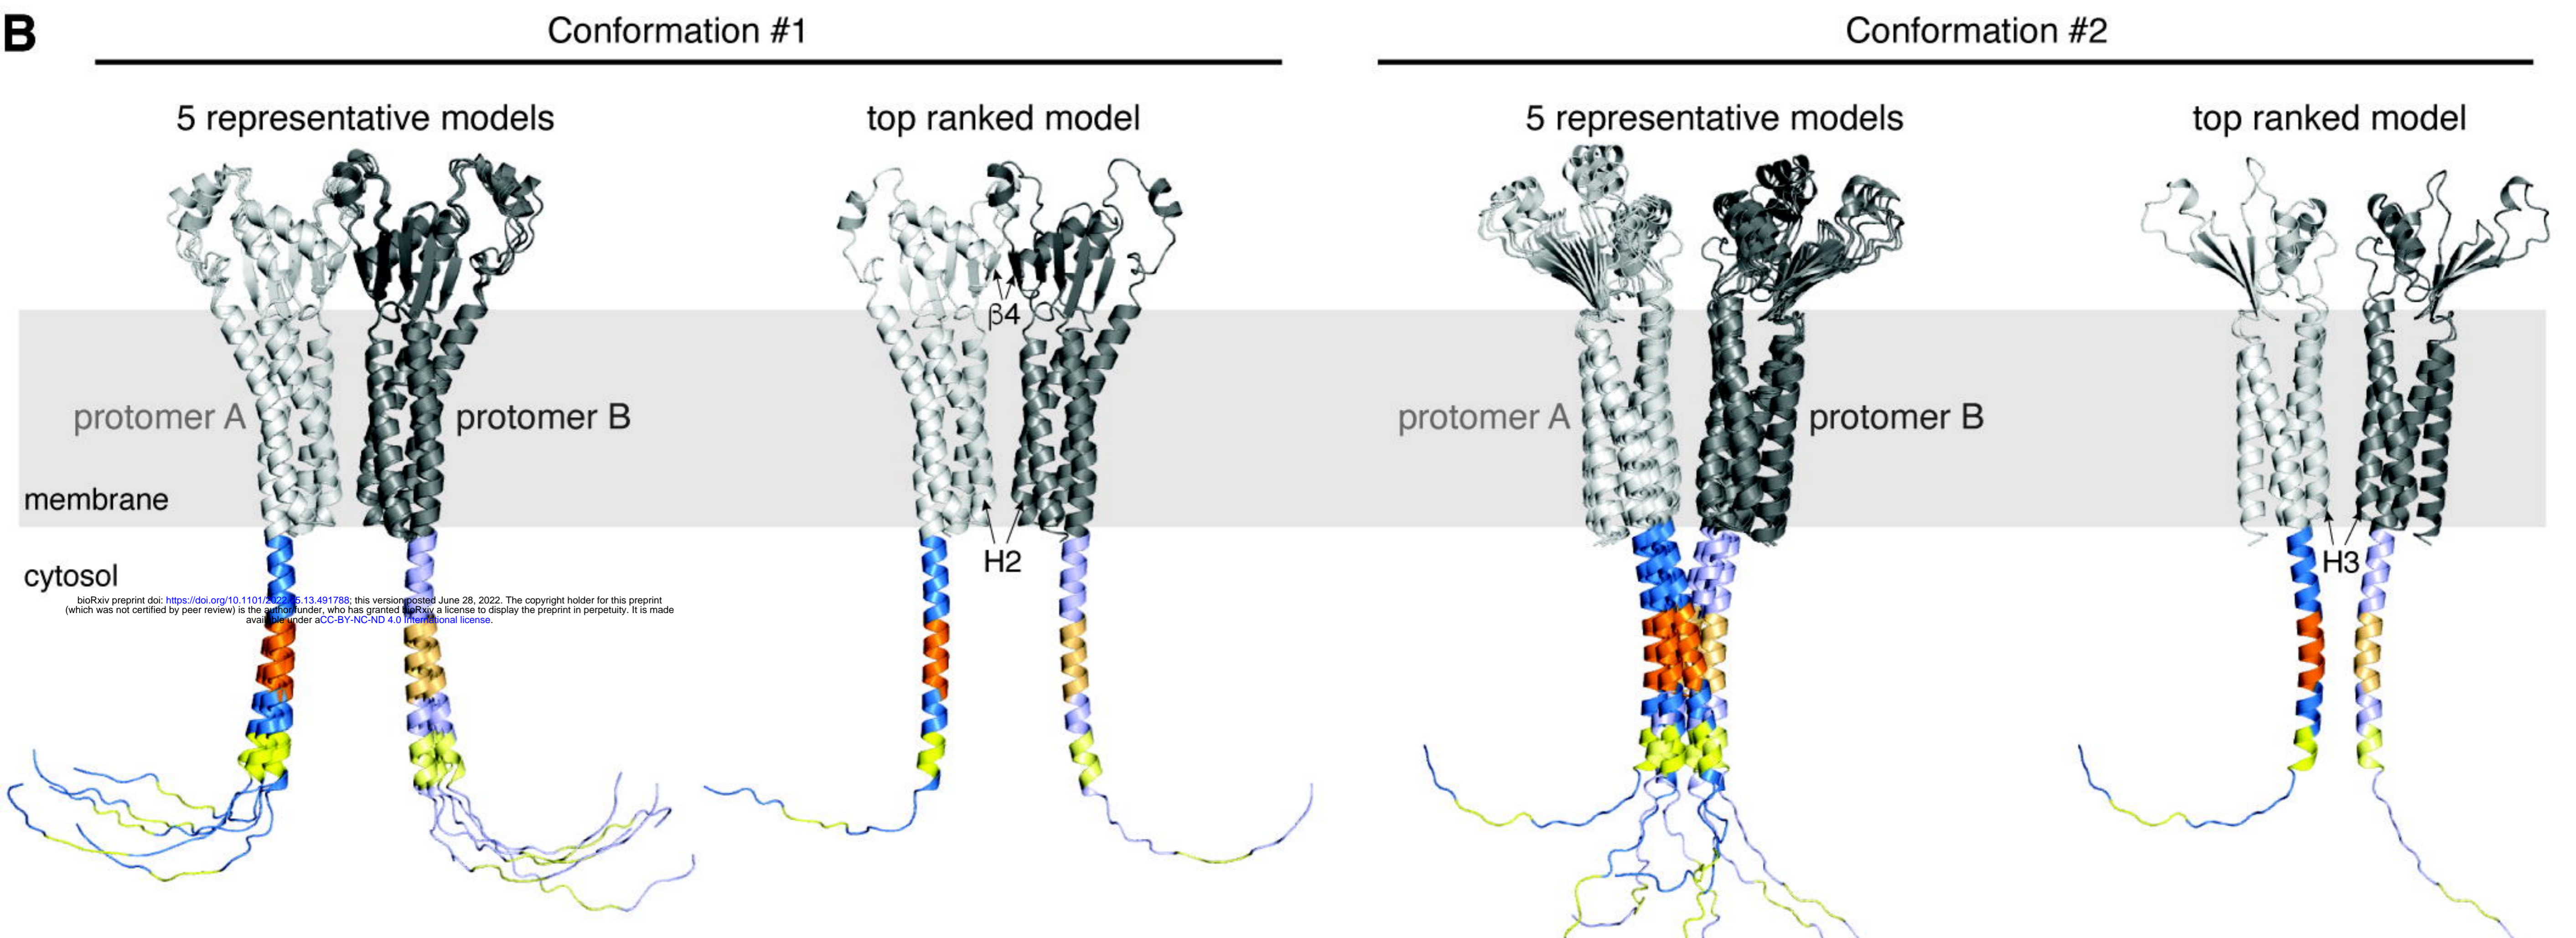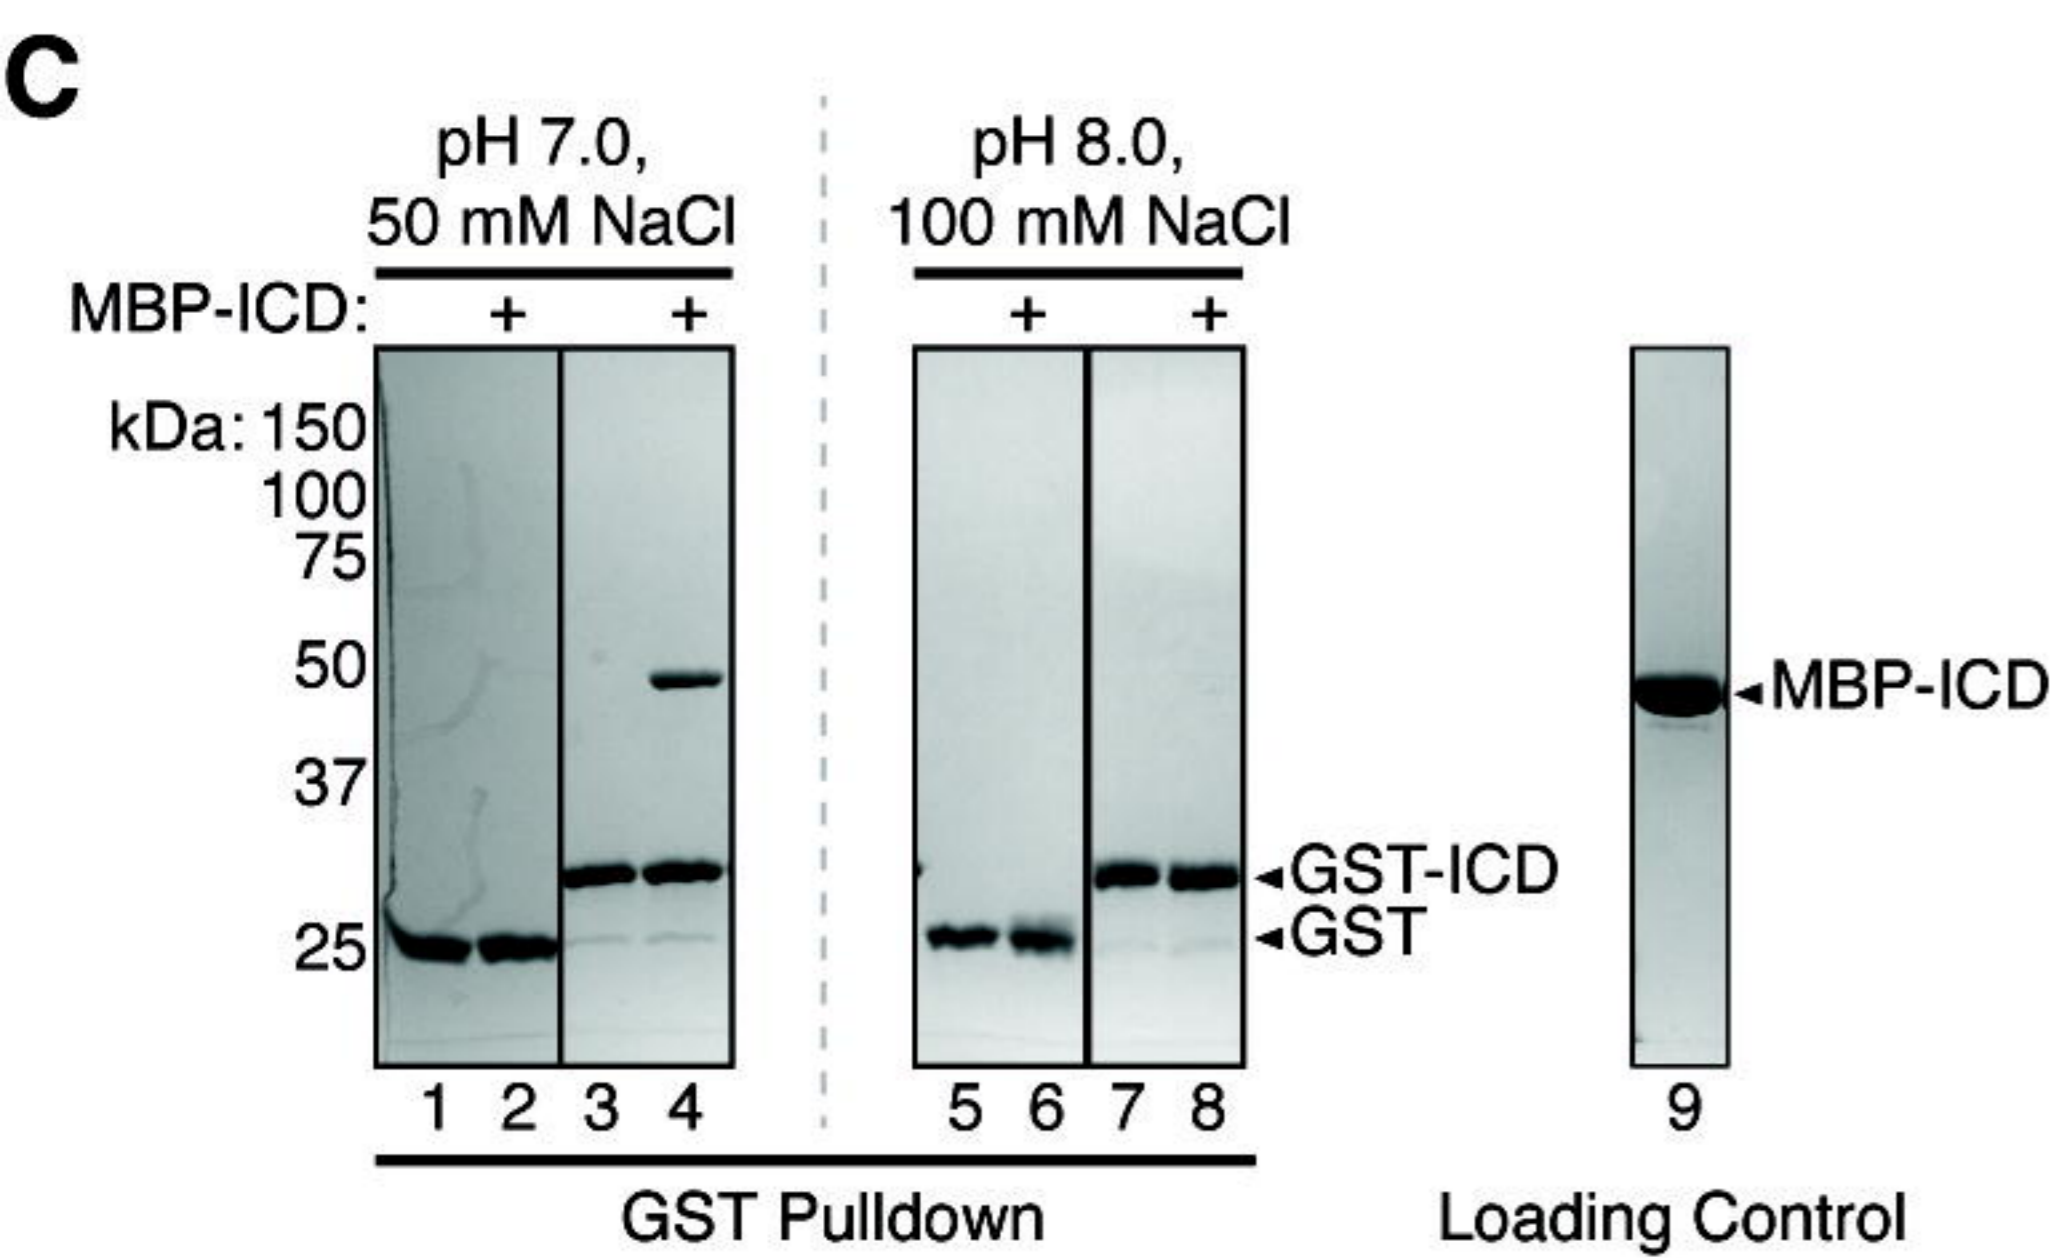



**A**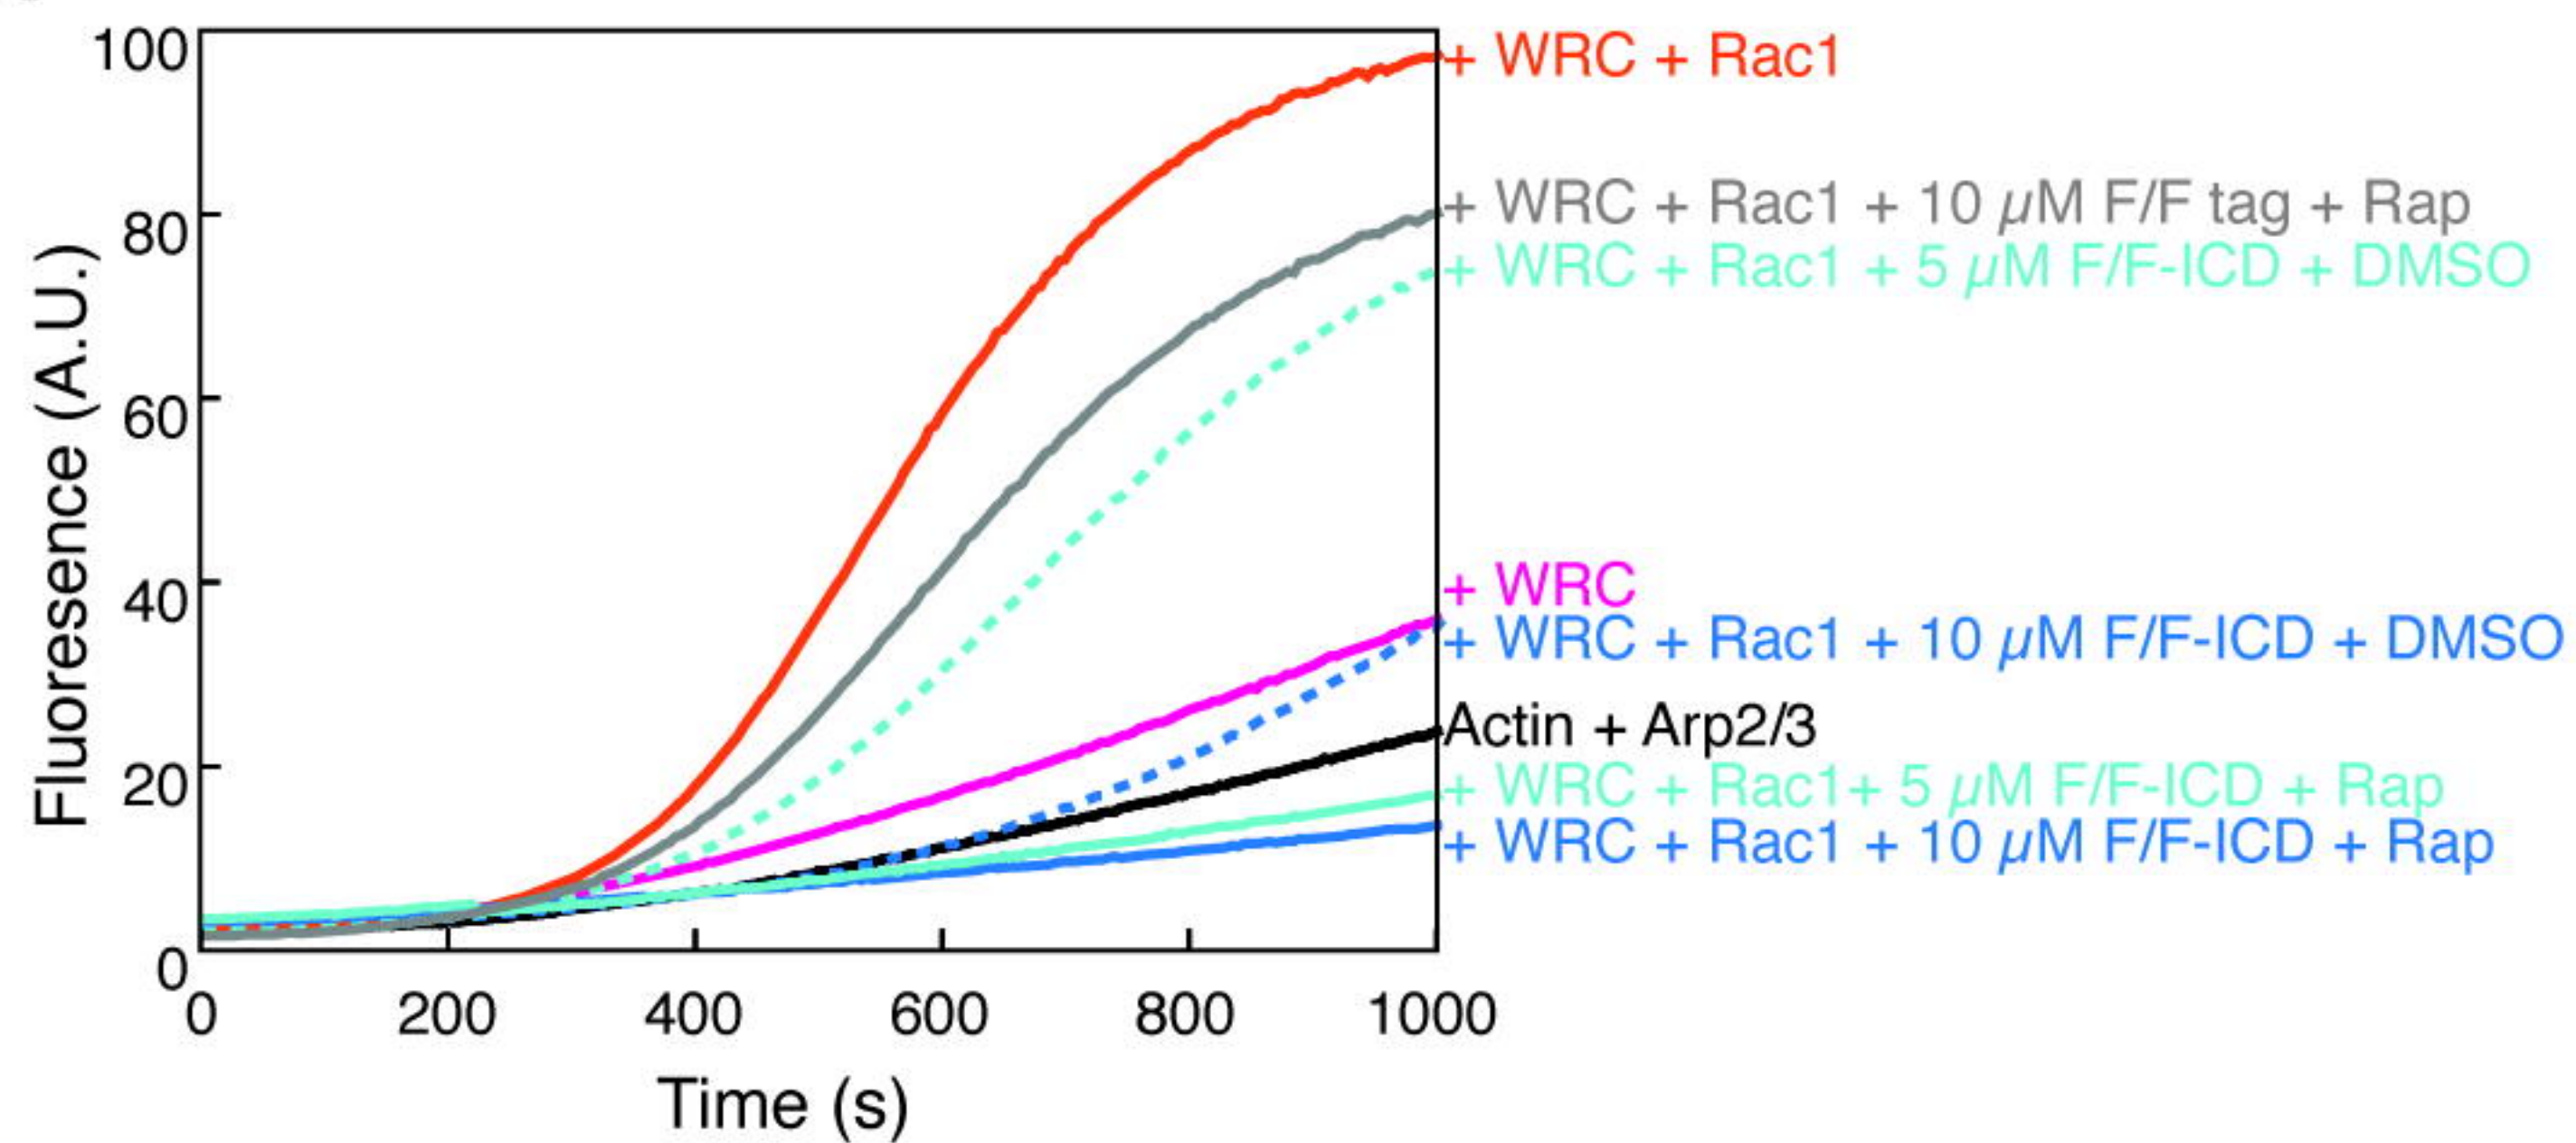**B**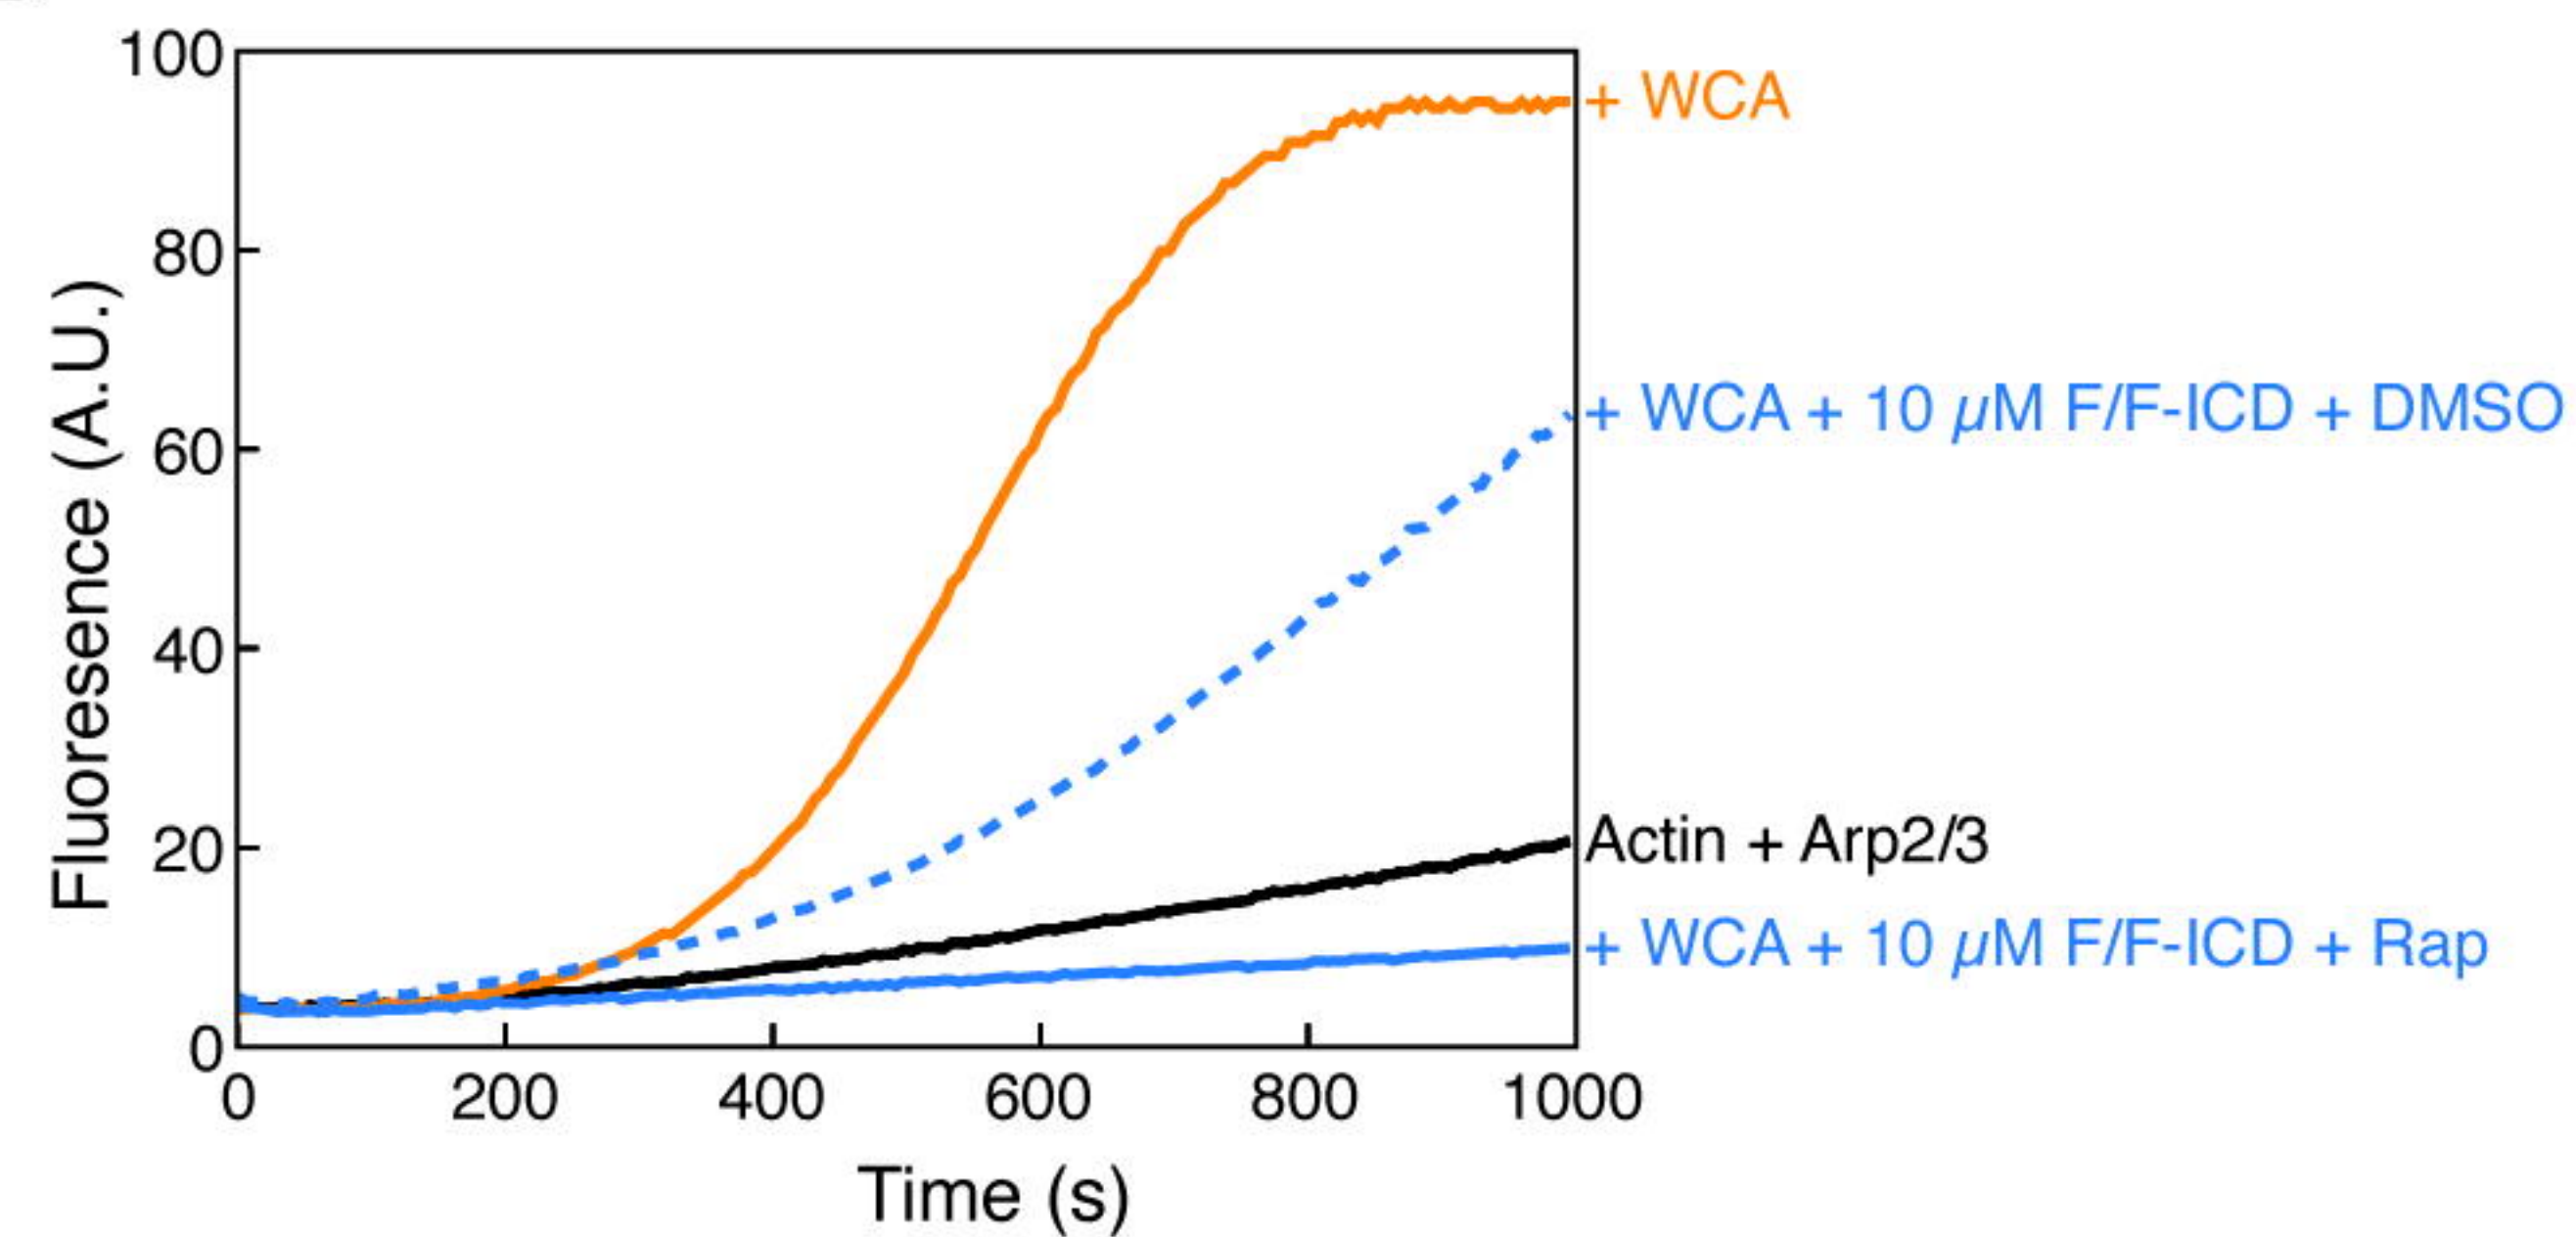**C**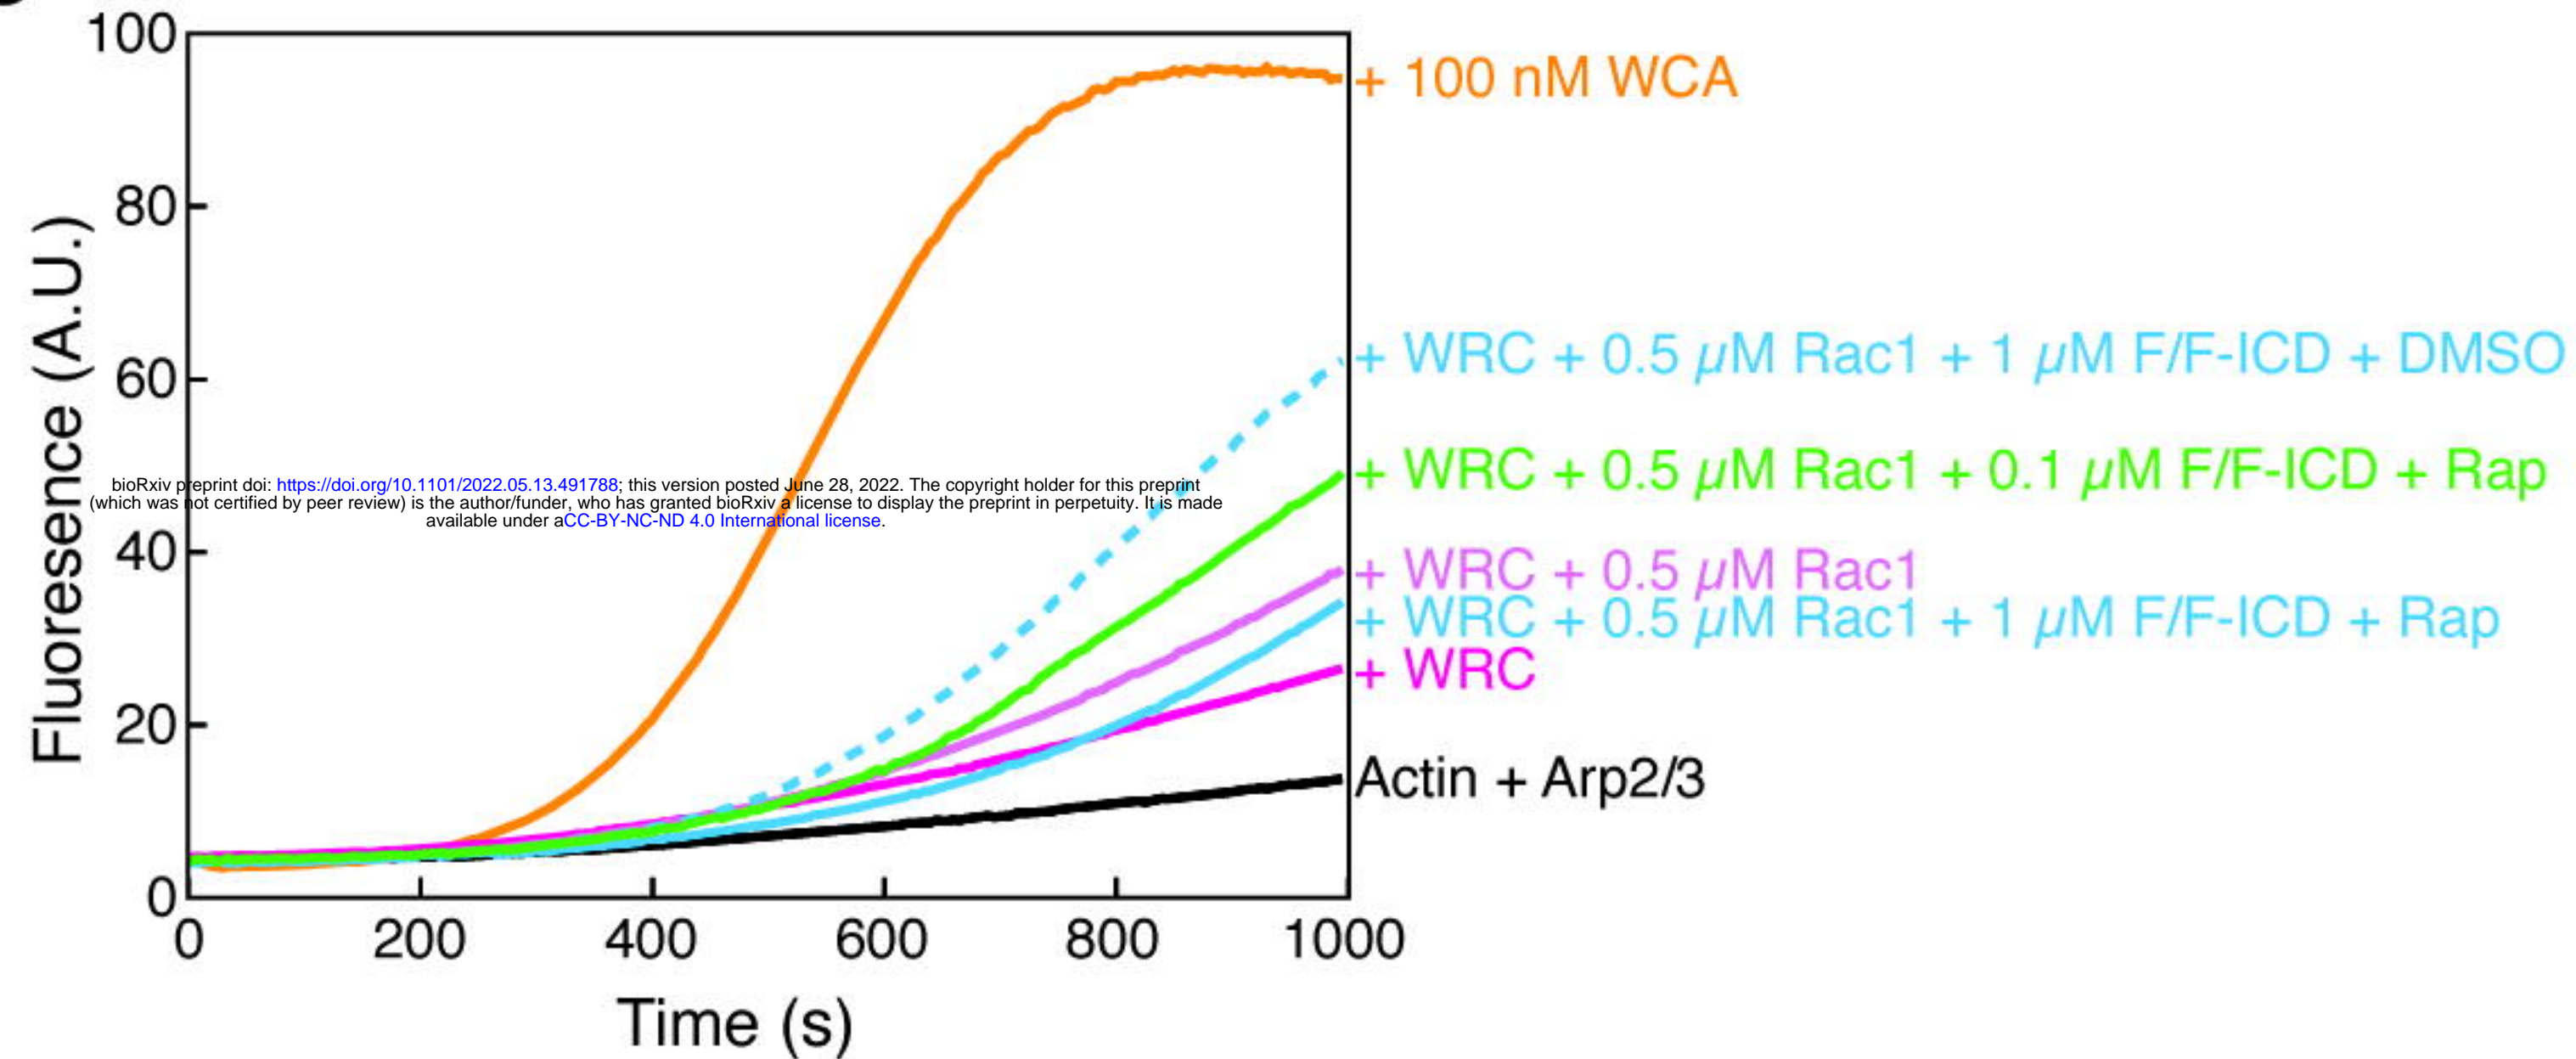**D**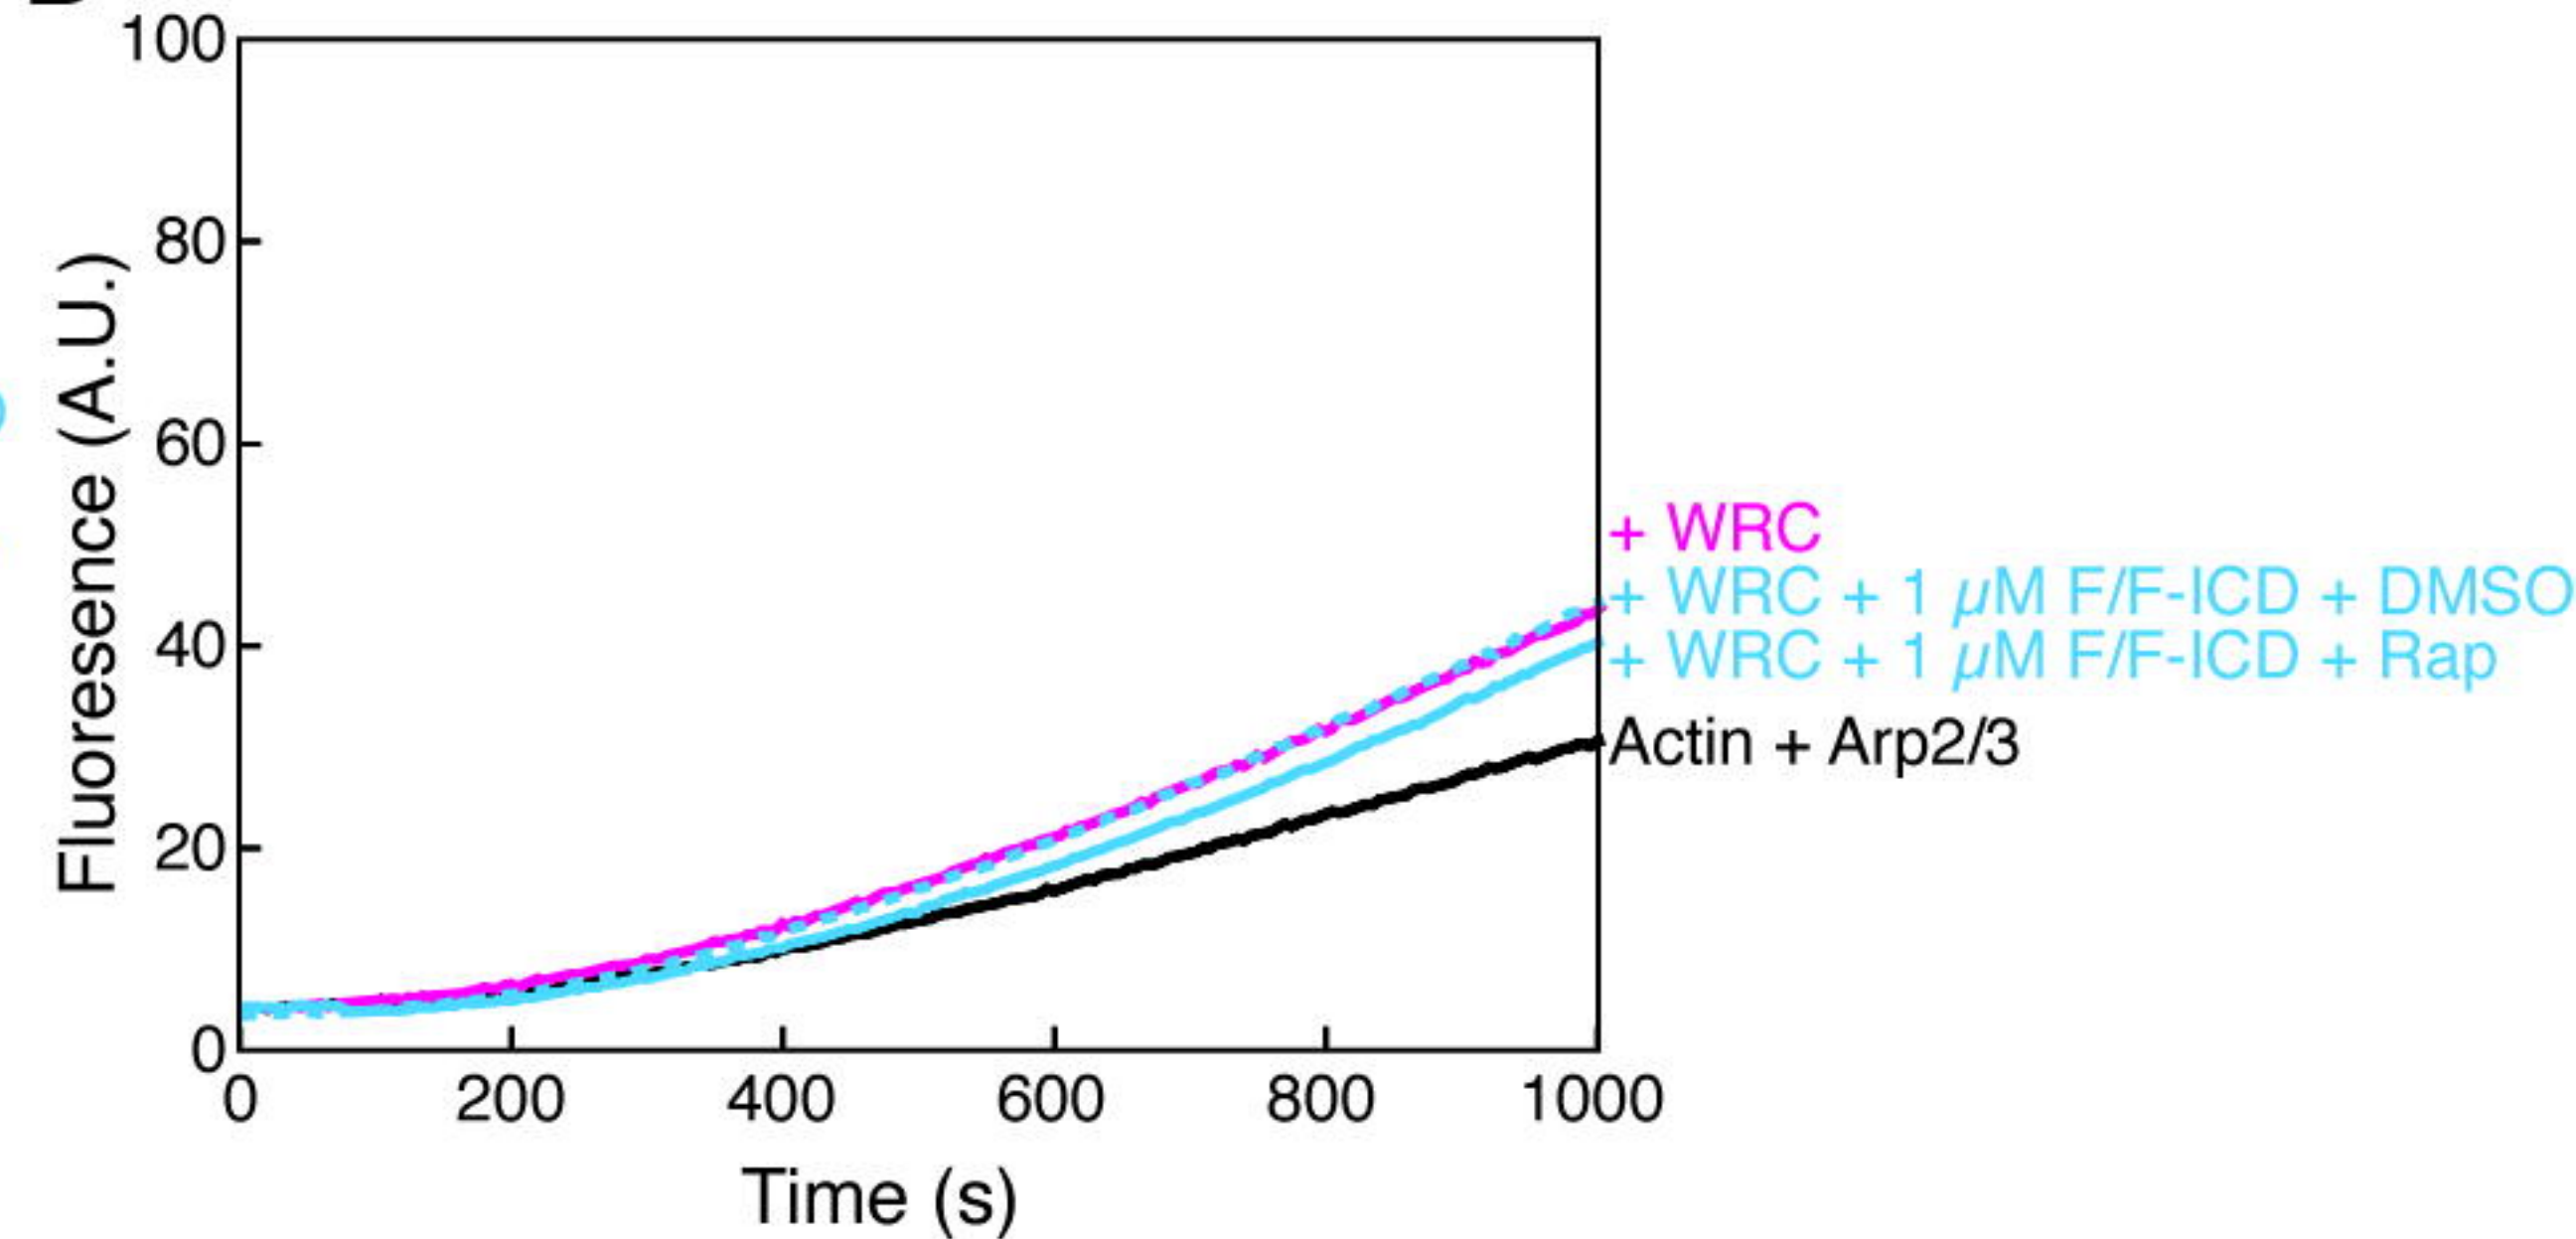**E**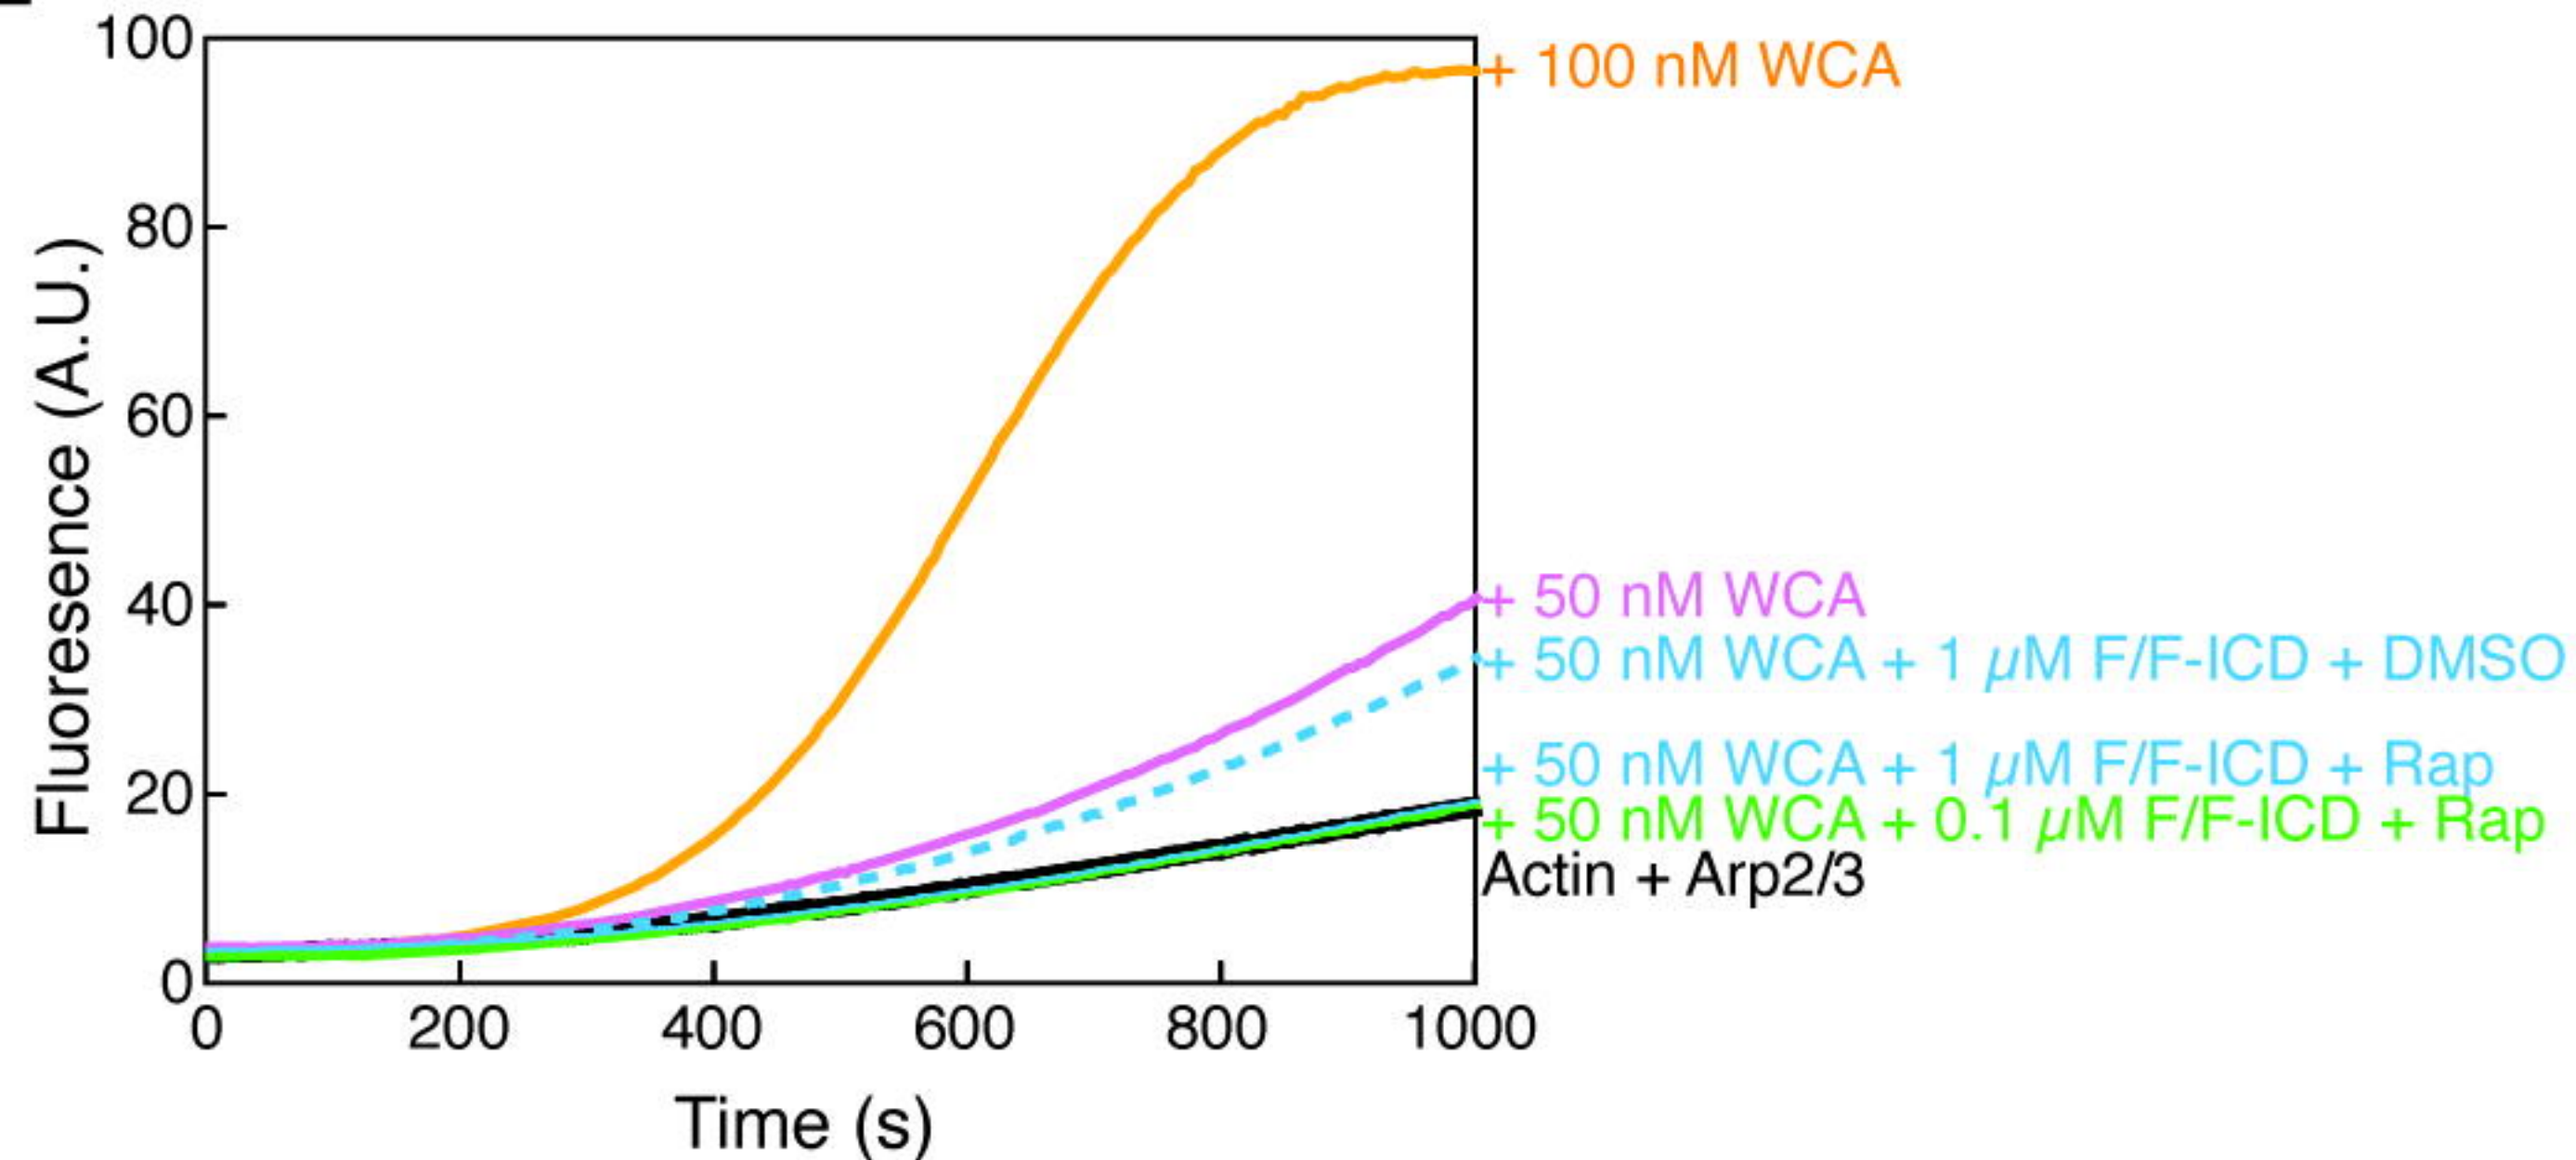**F**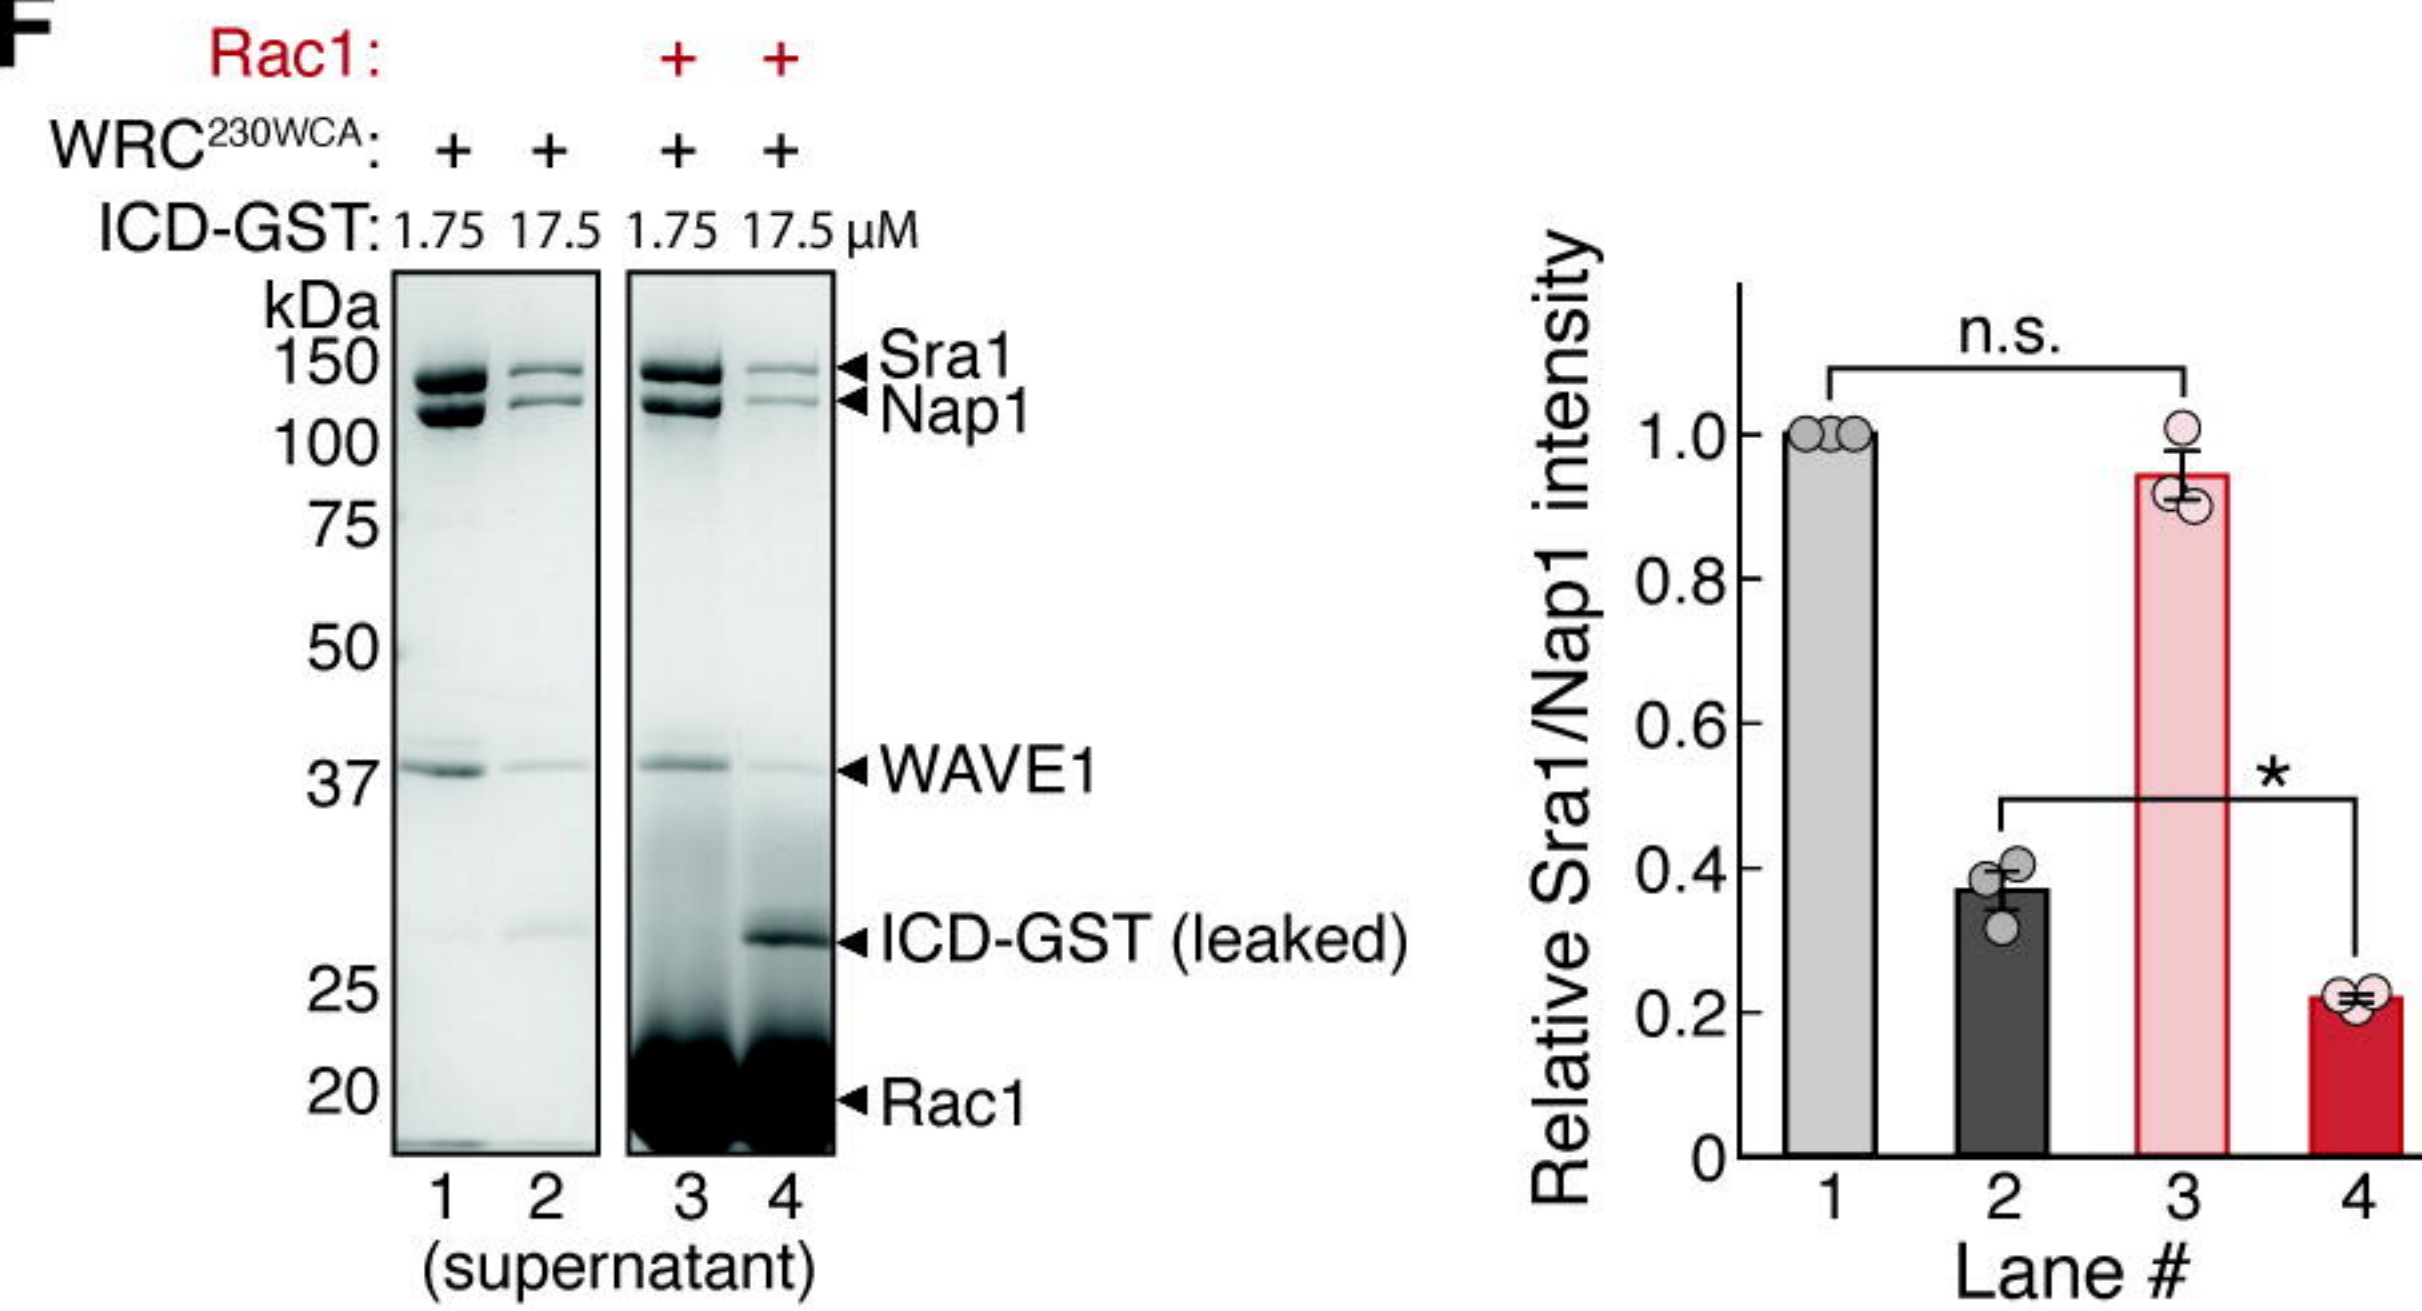



**A**

Buffer: (all pH 7.0 and containing 1 mM MgCl<sub>2</sub>, 1 mM EGTA, 1 mM DTT)

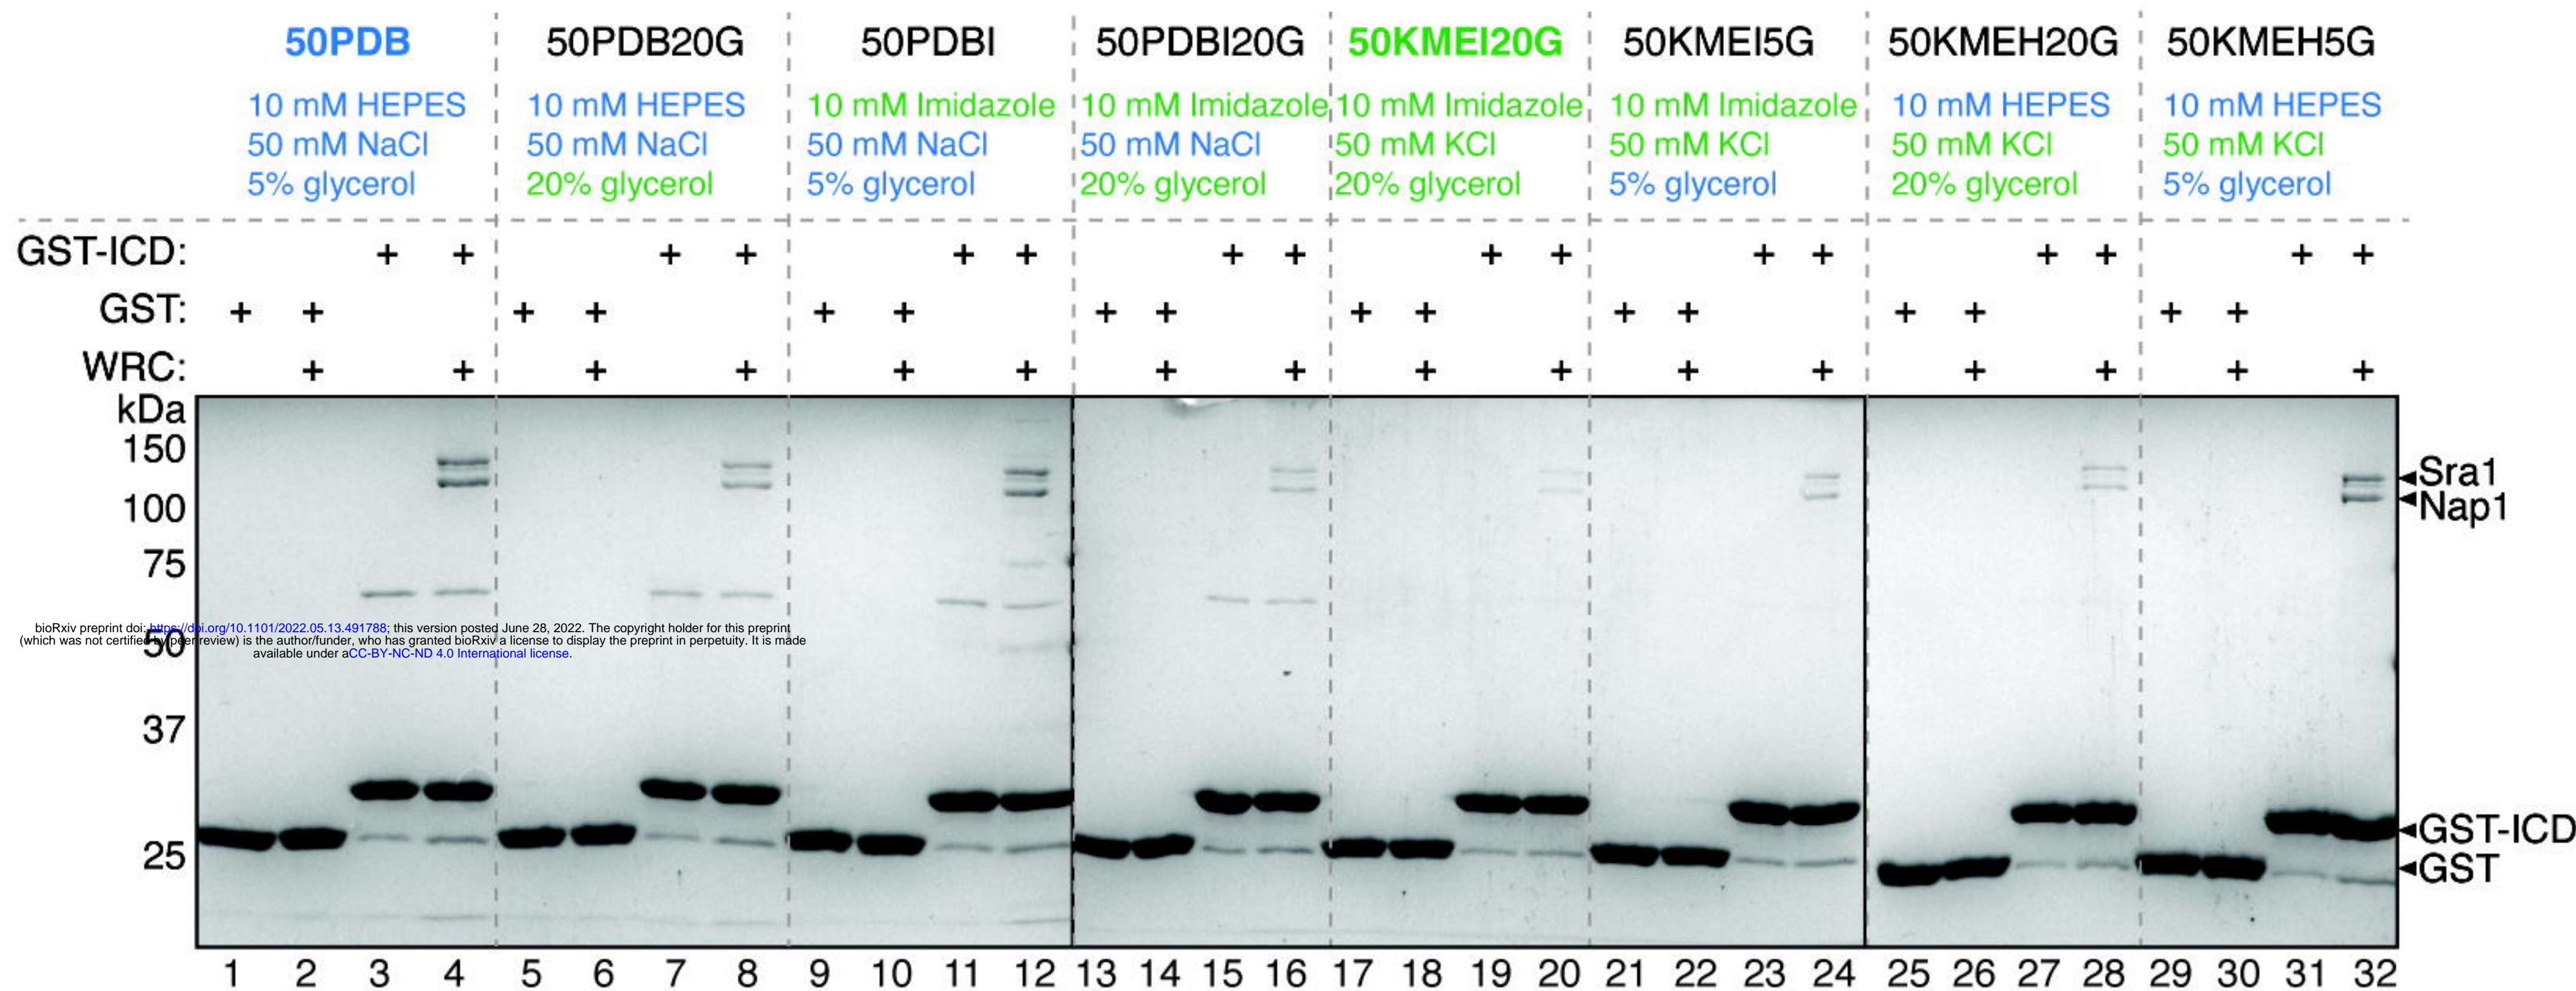**B**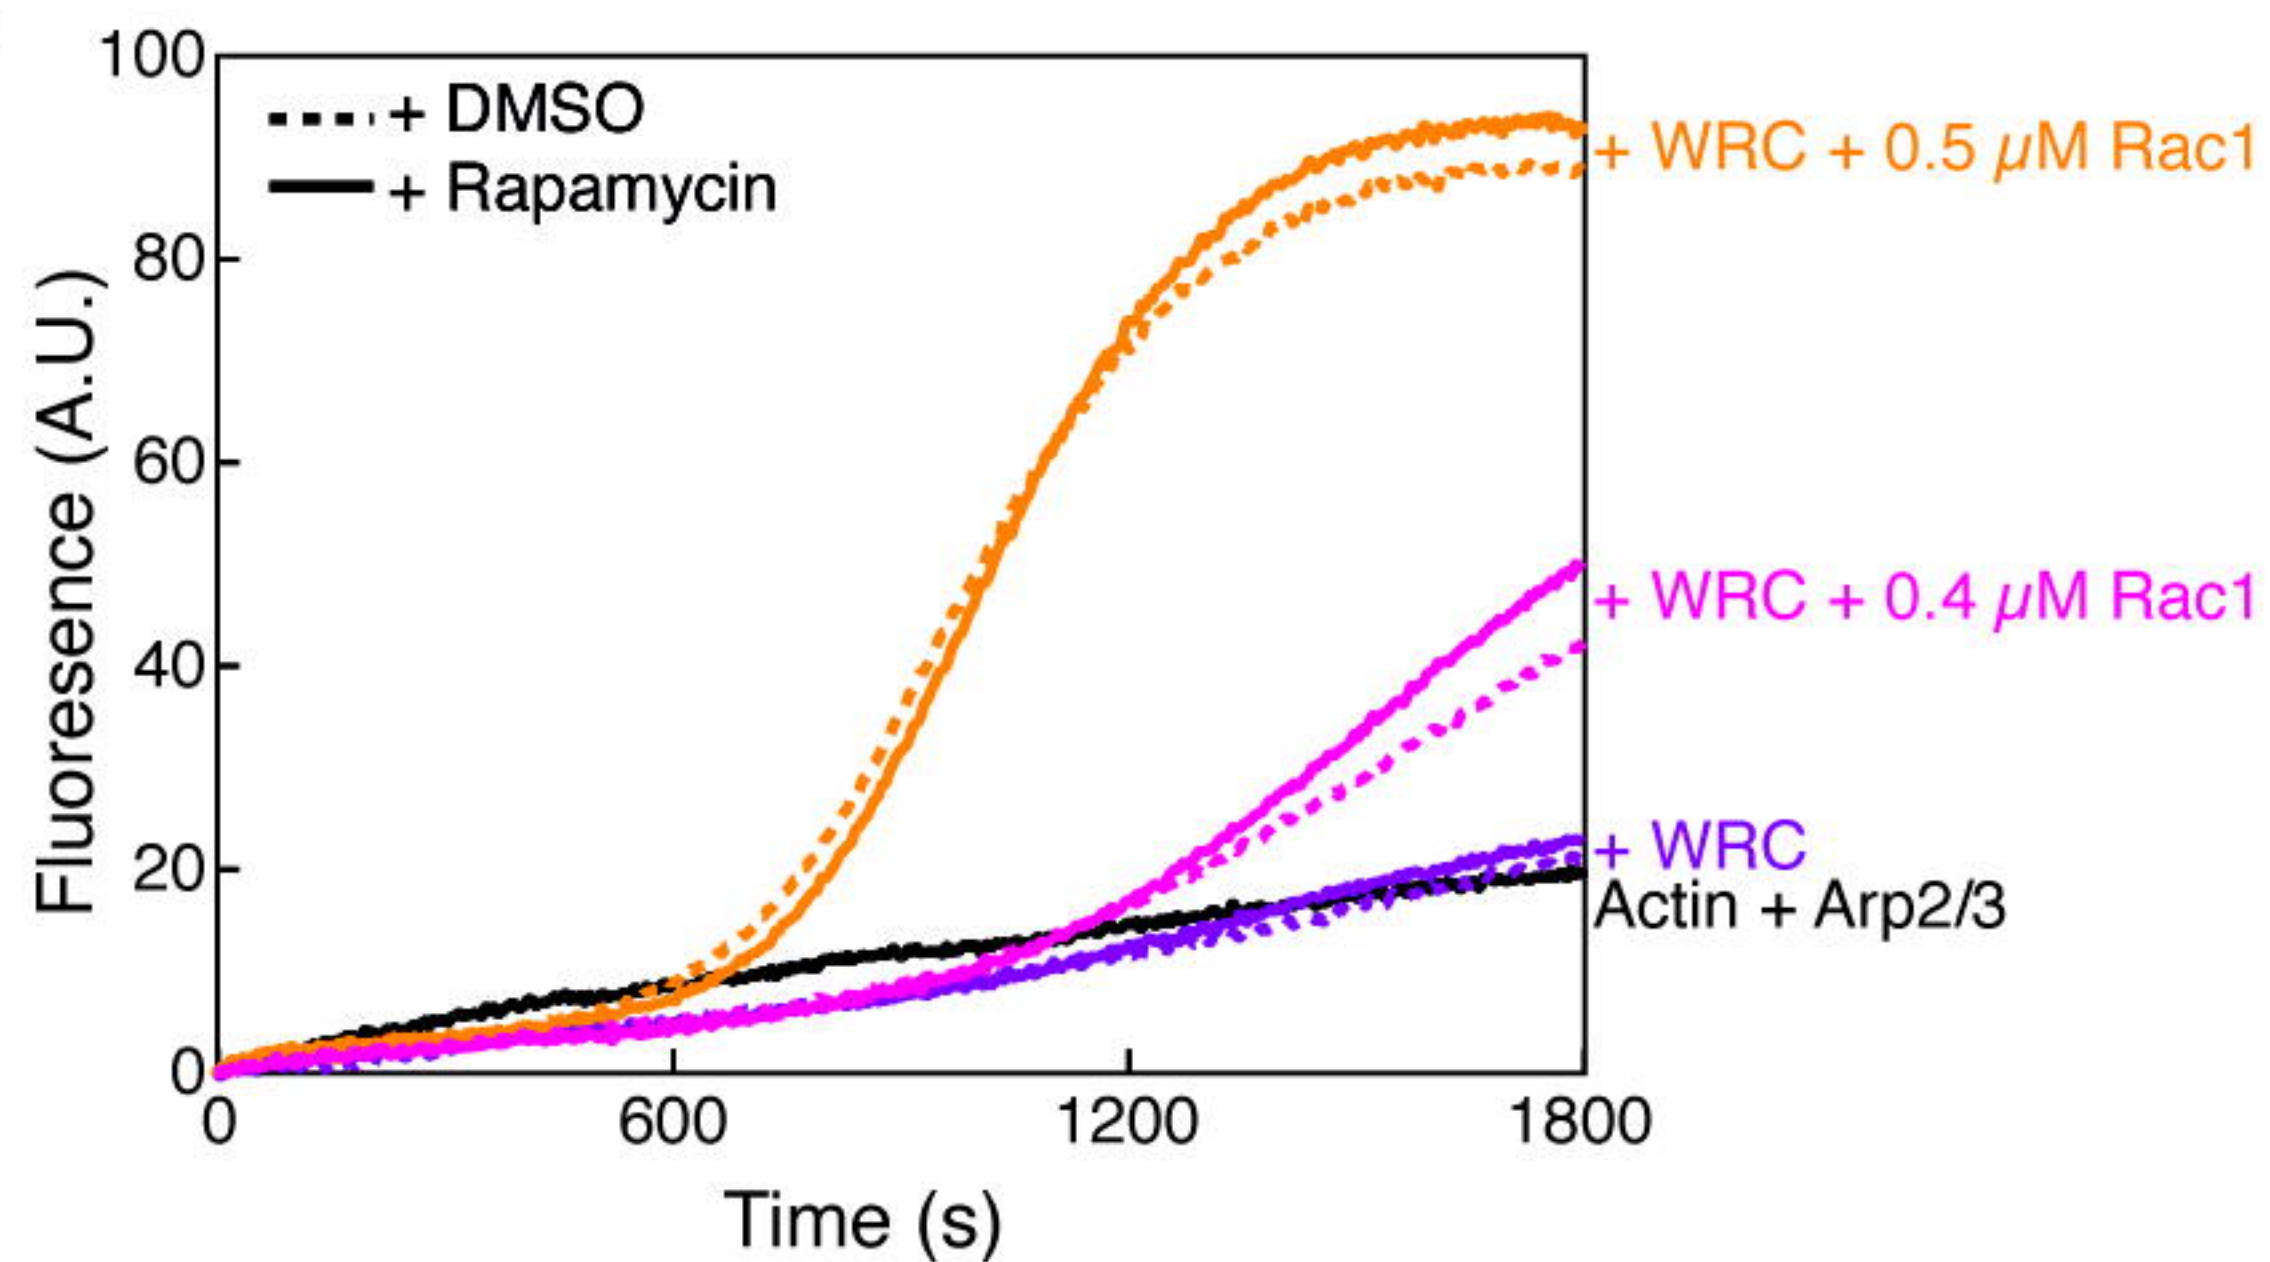







**A**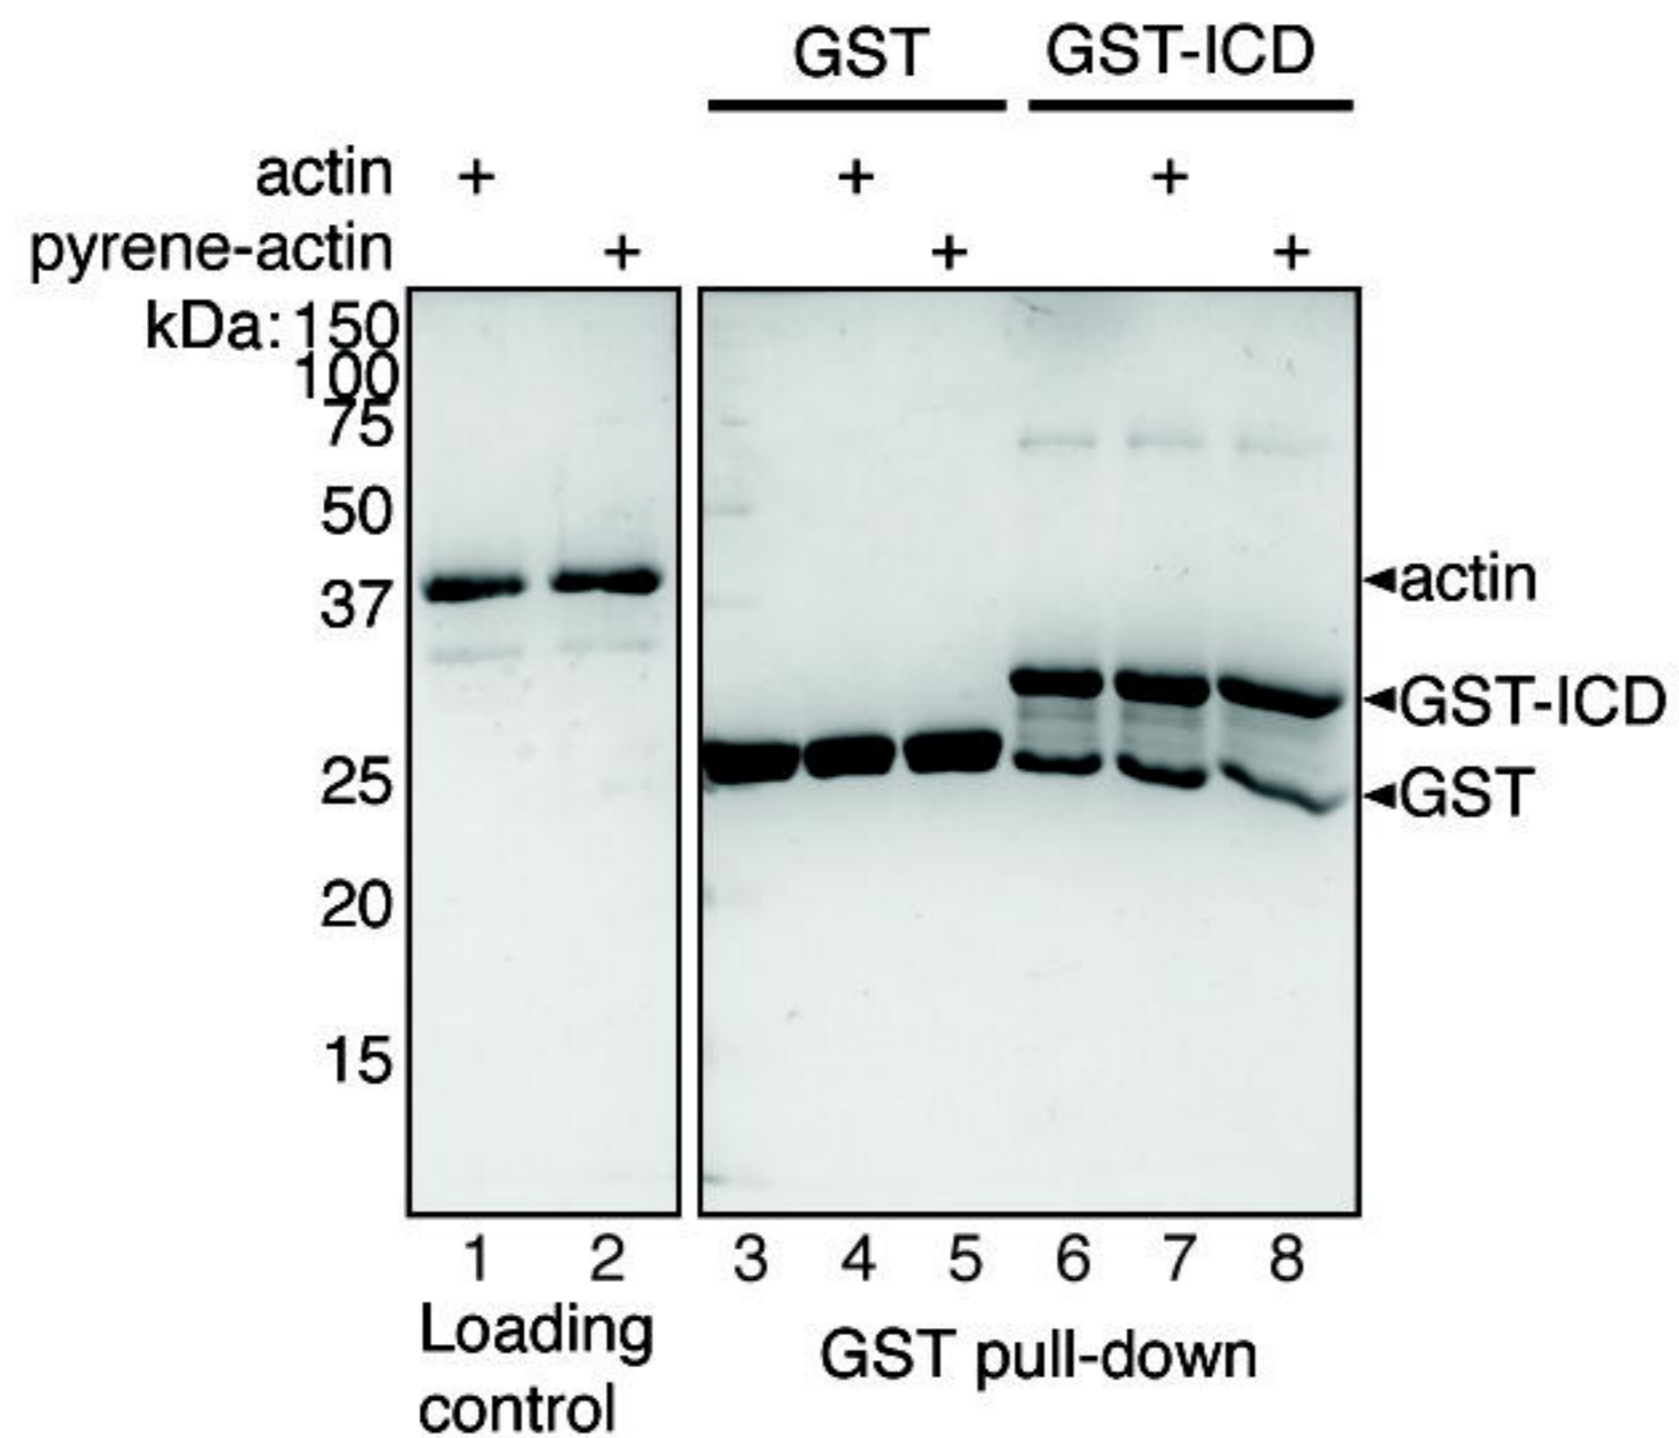**B**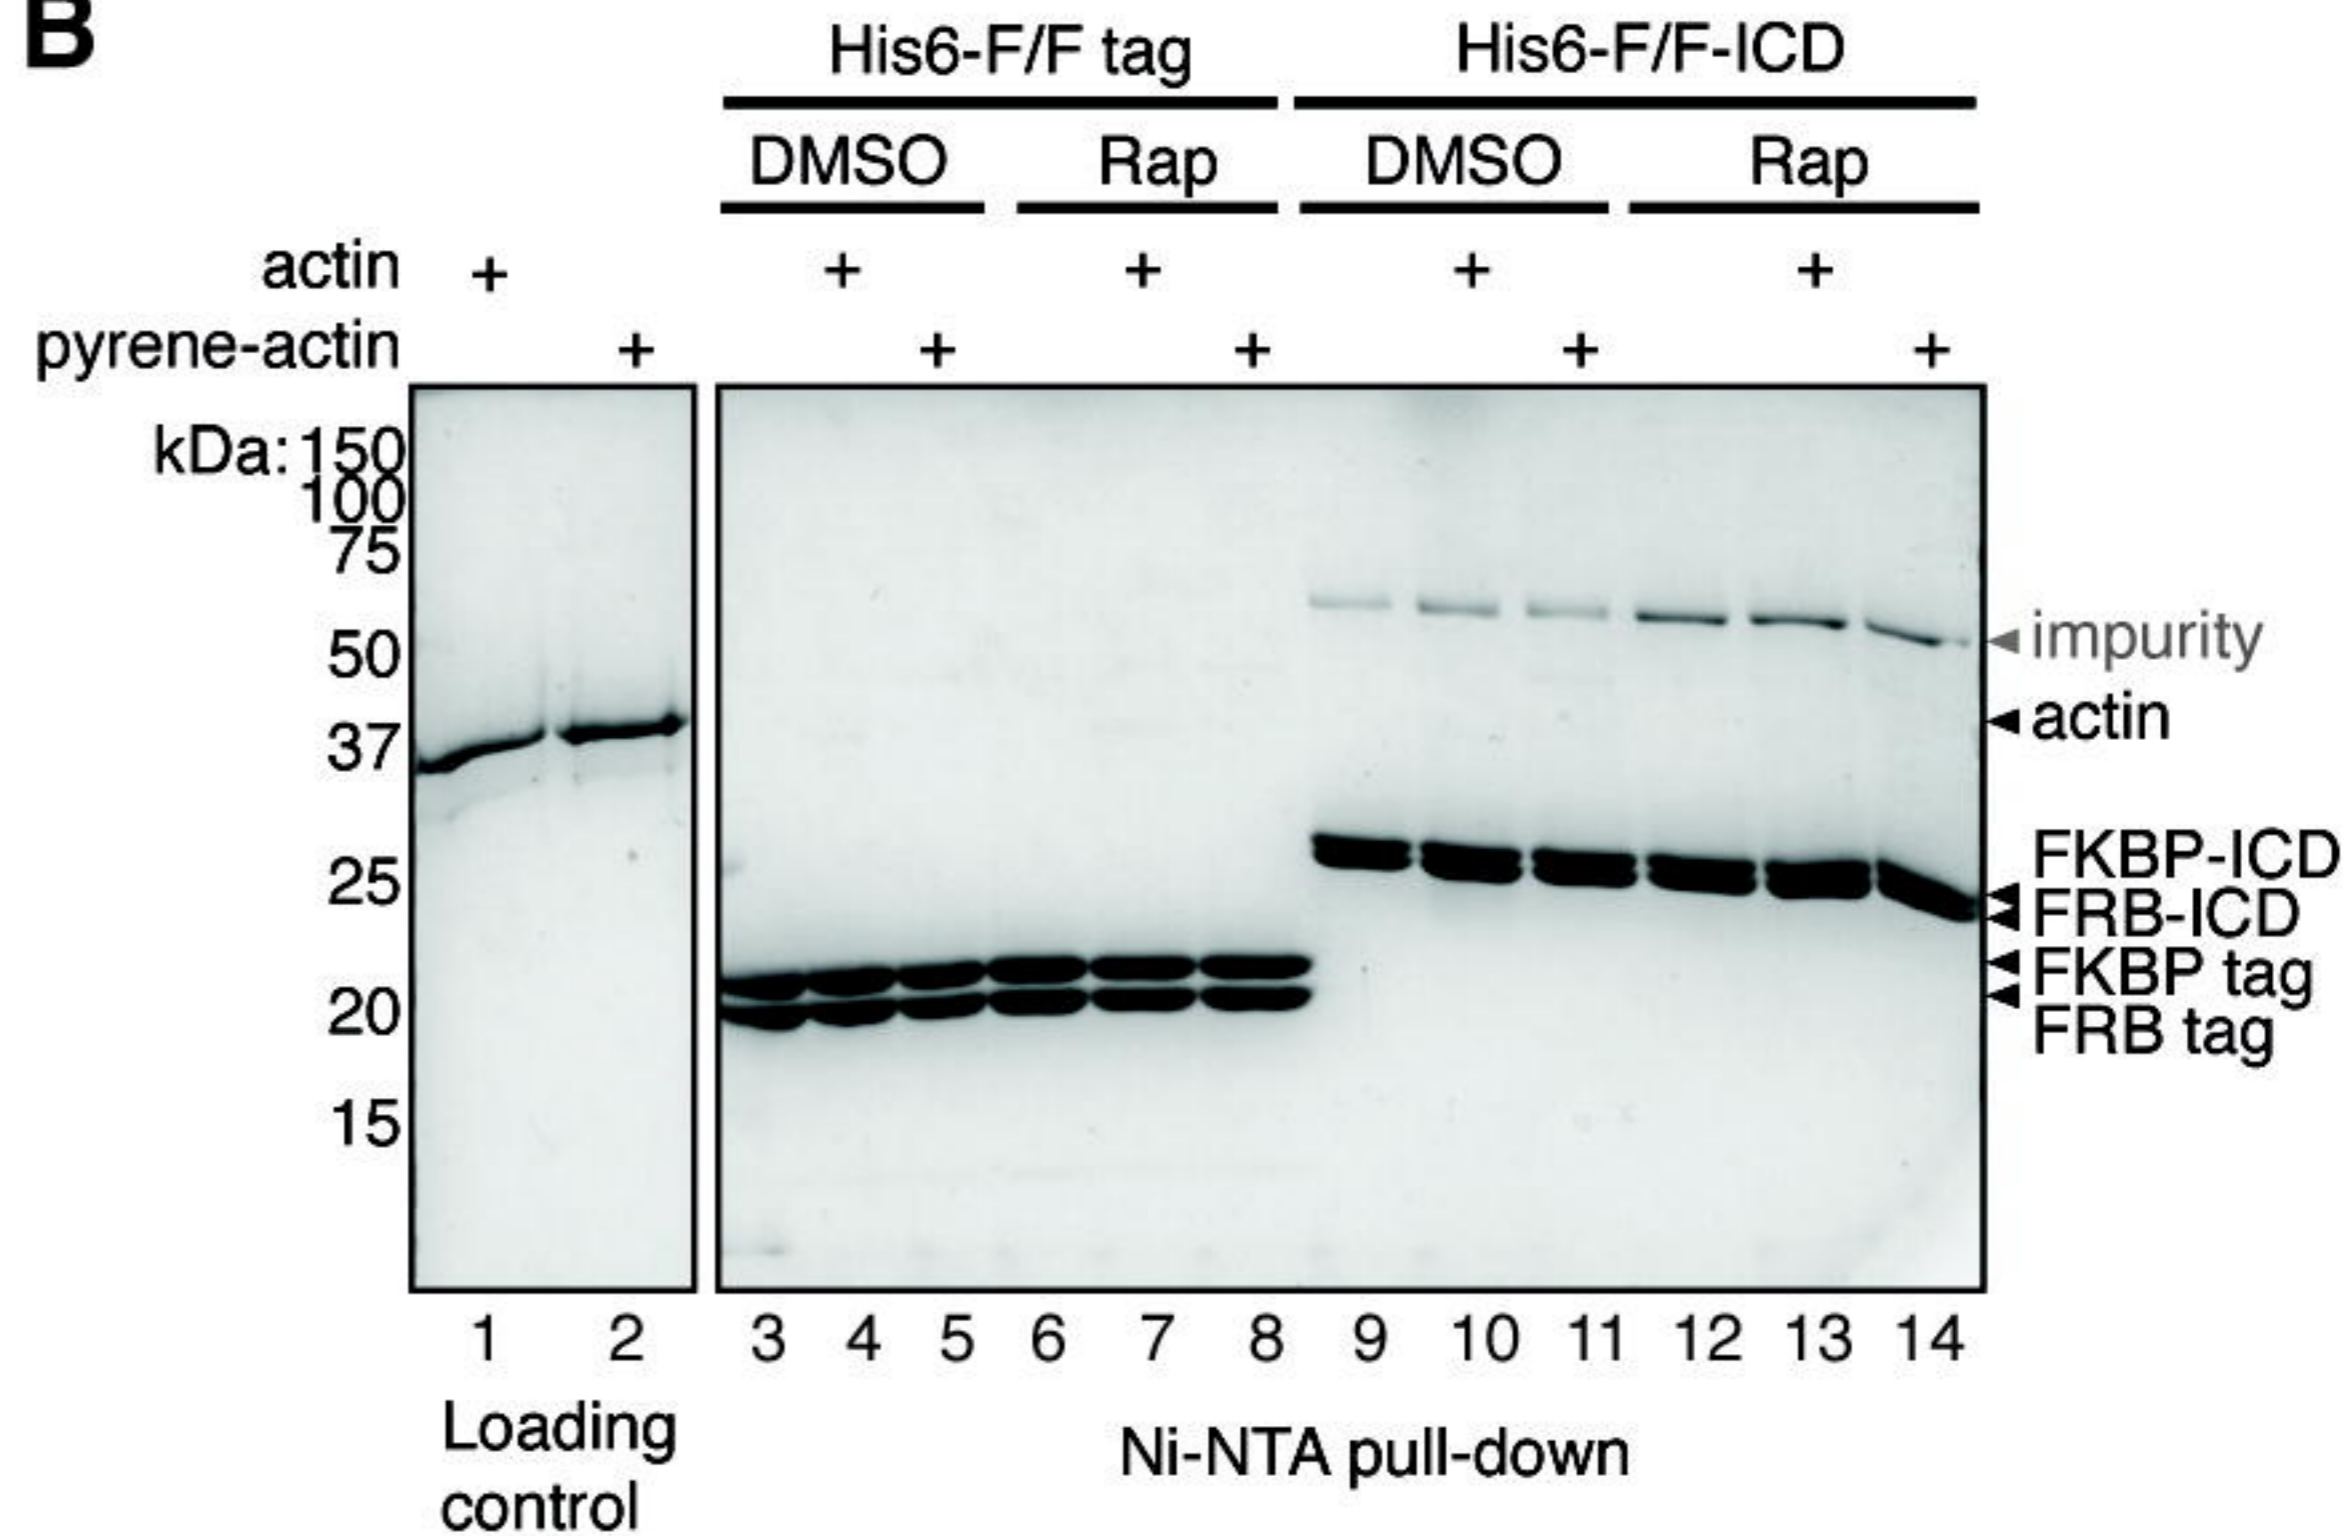



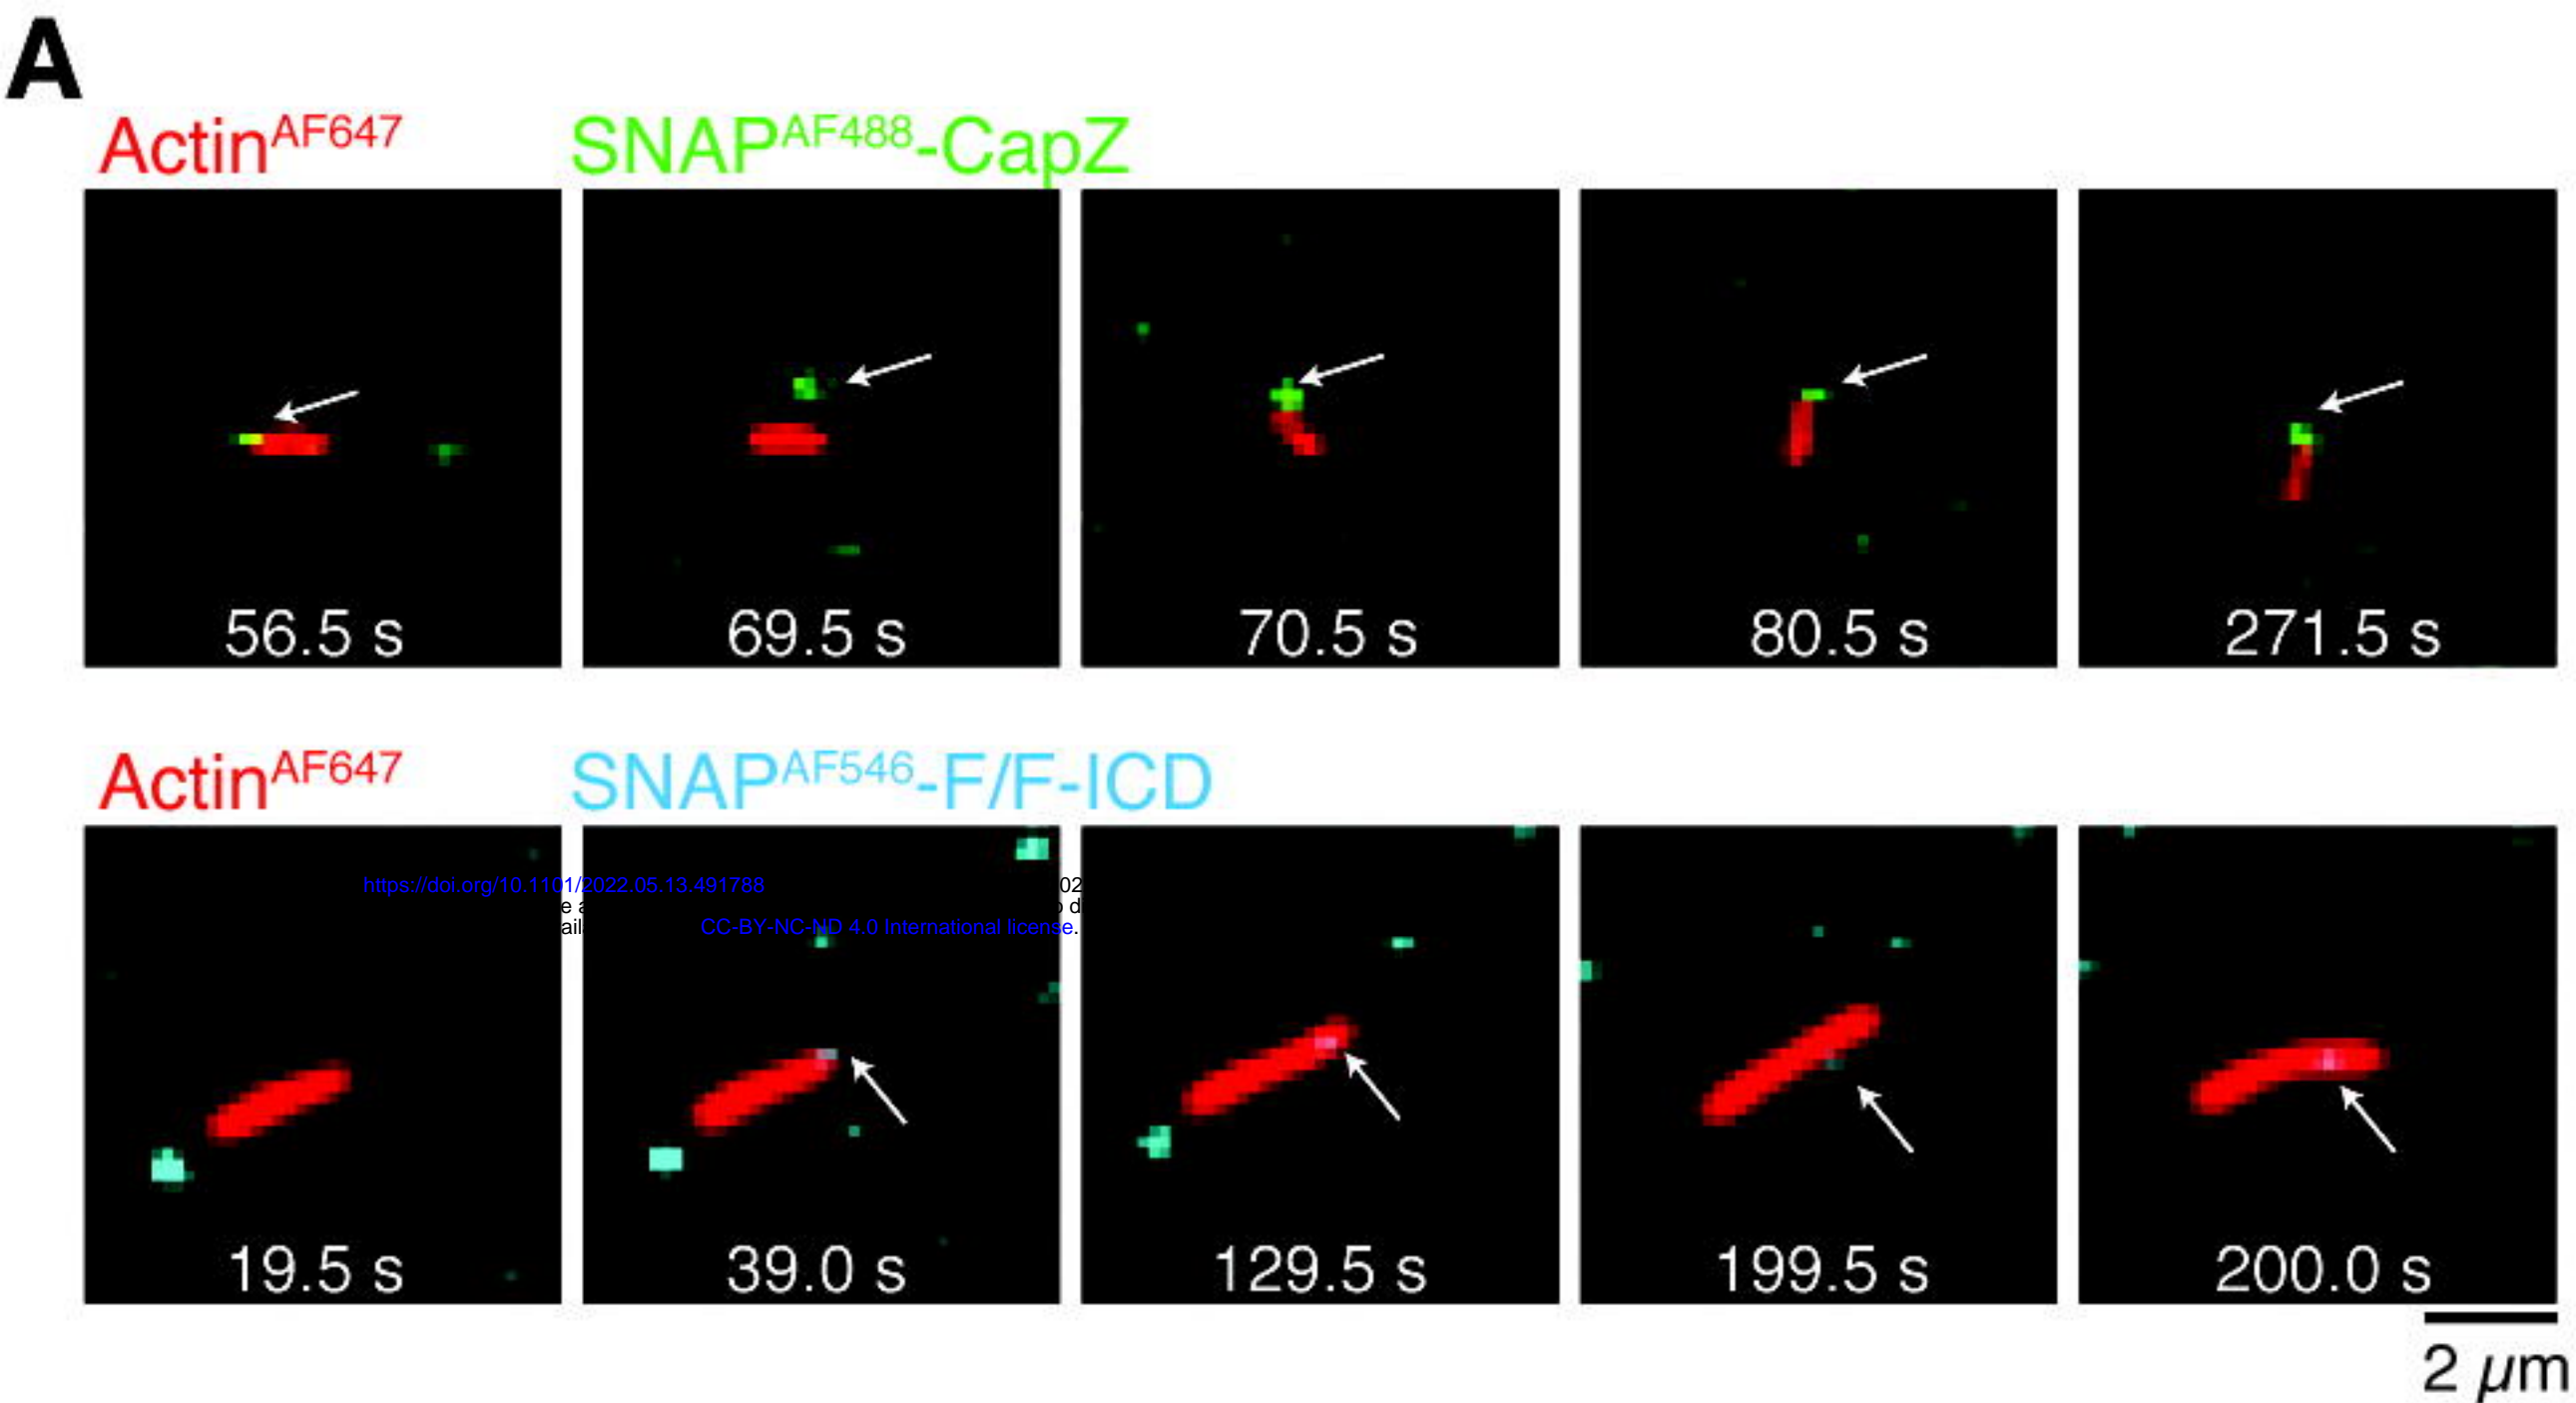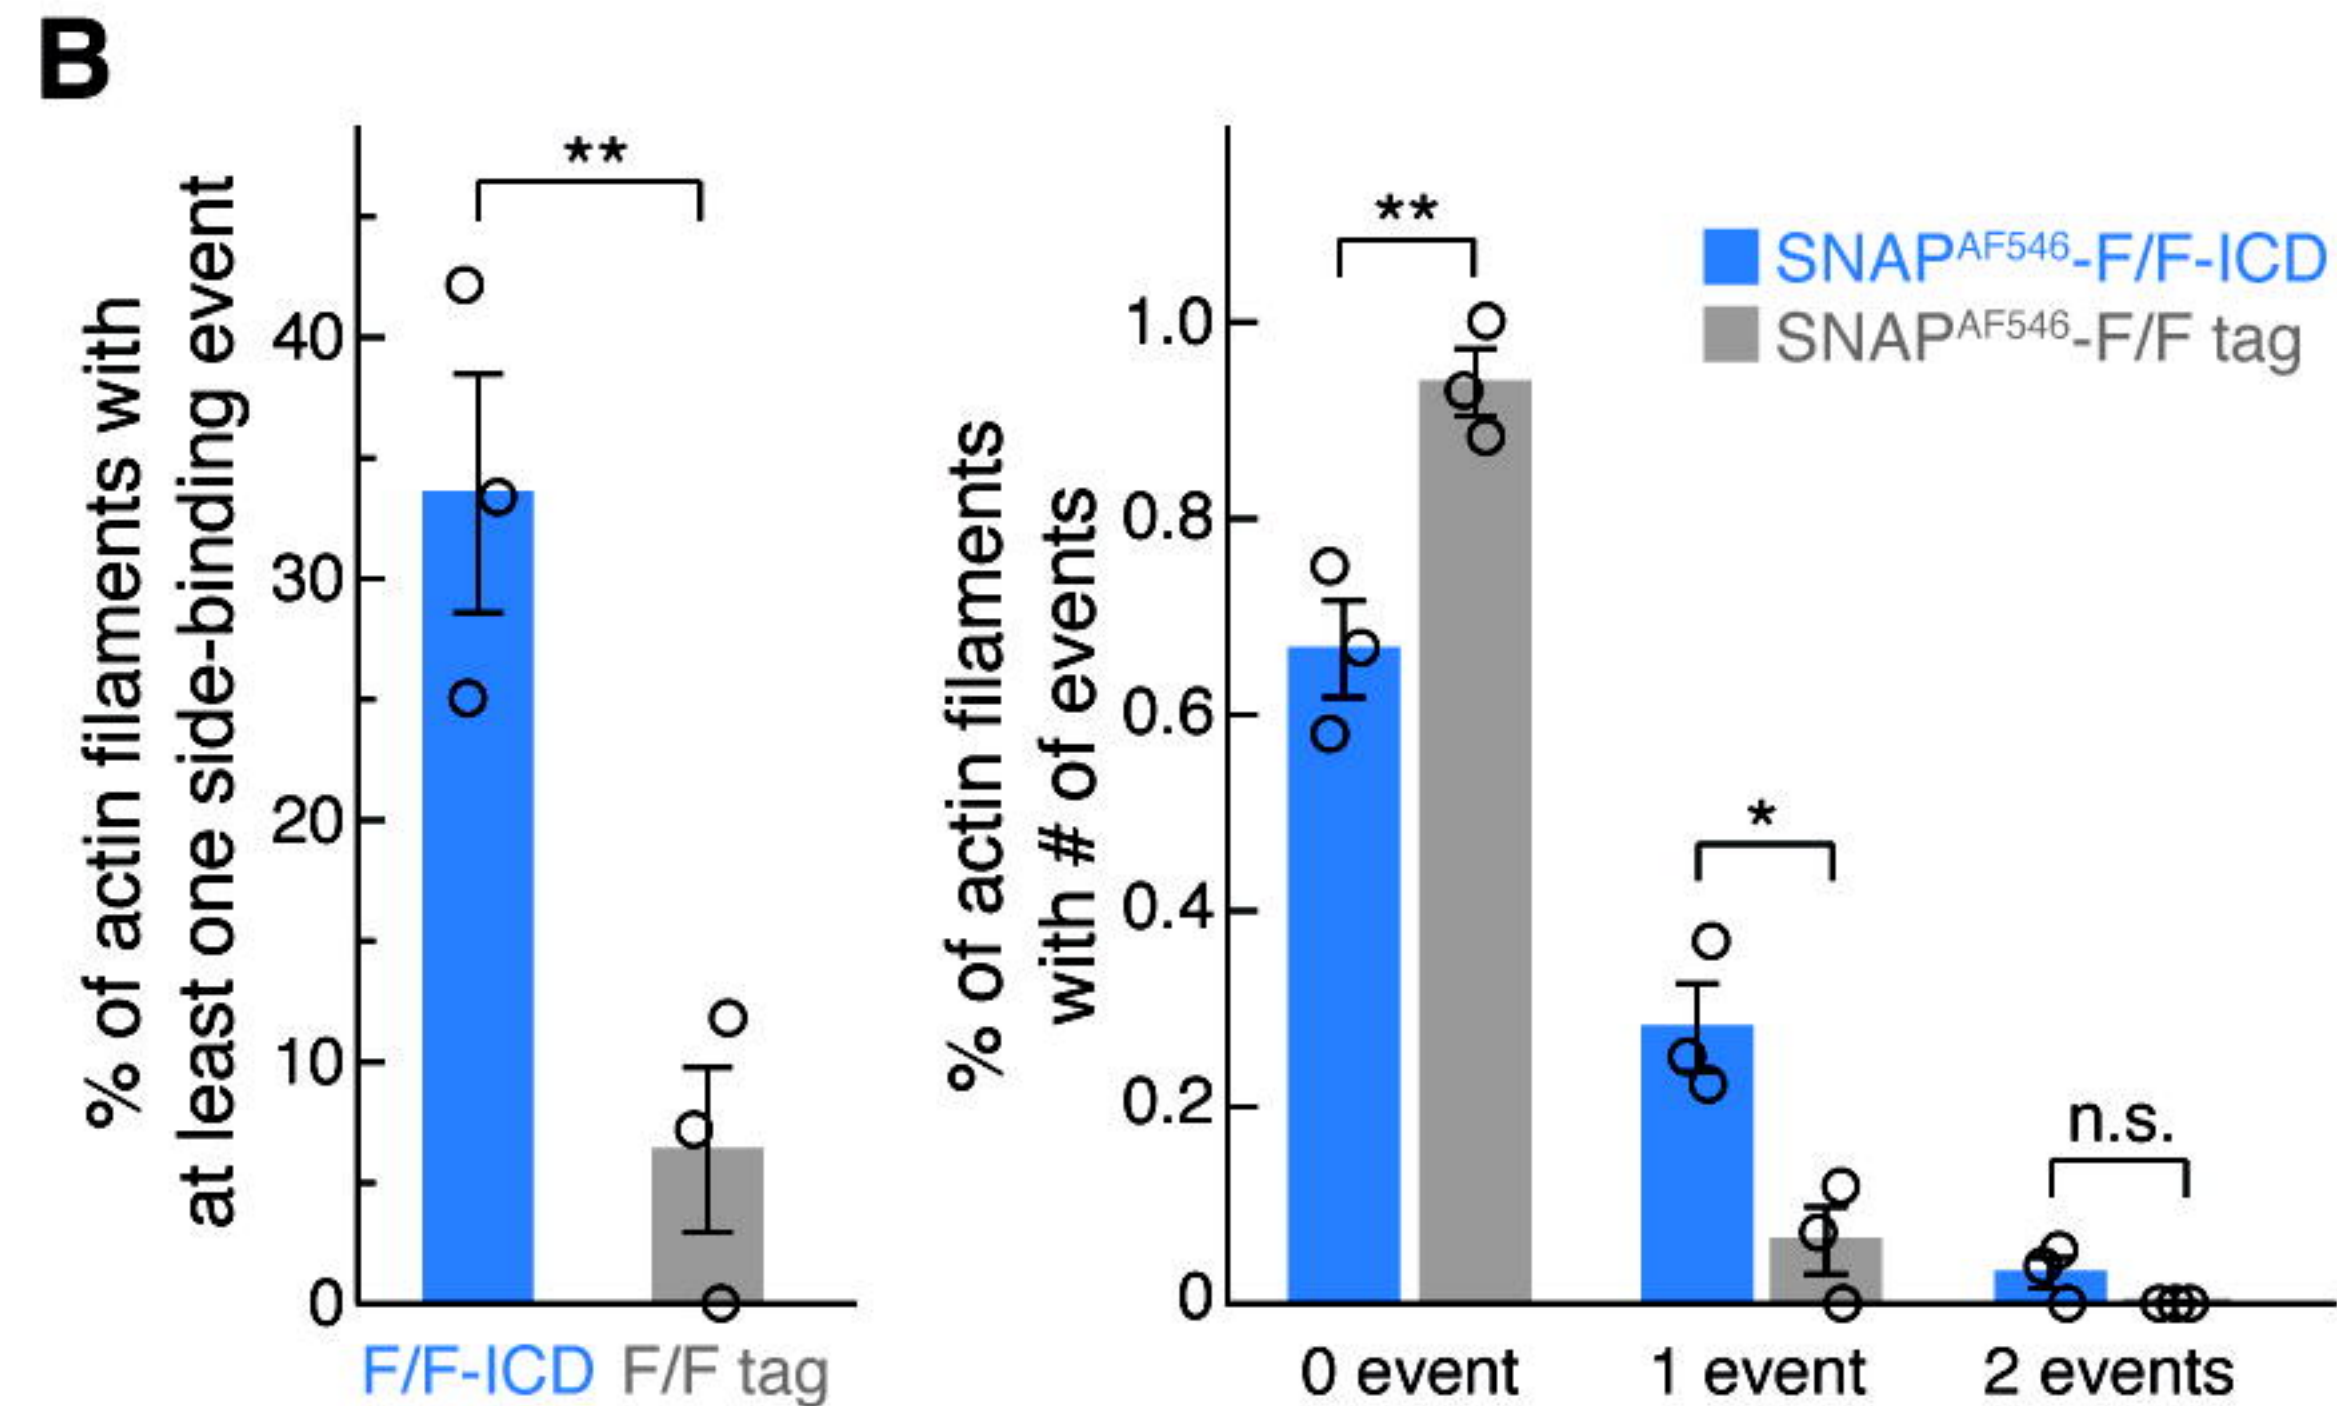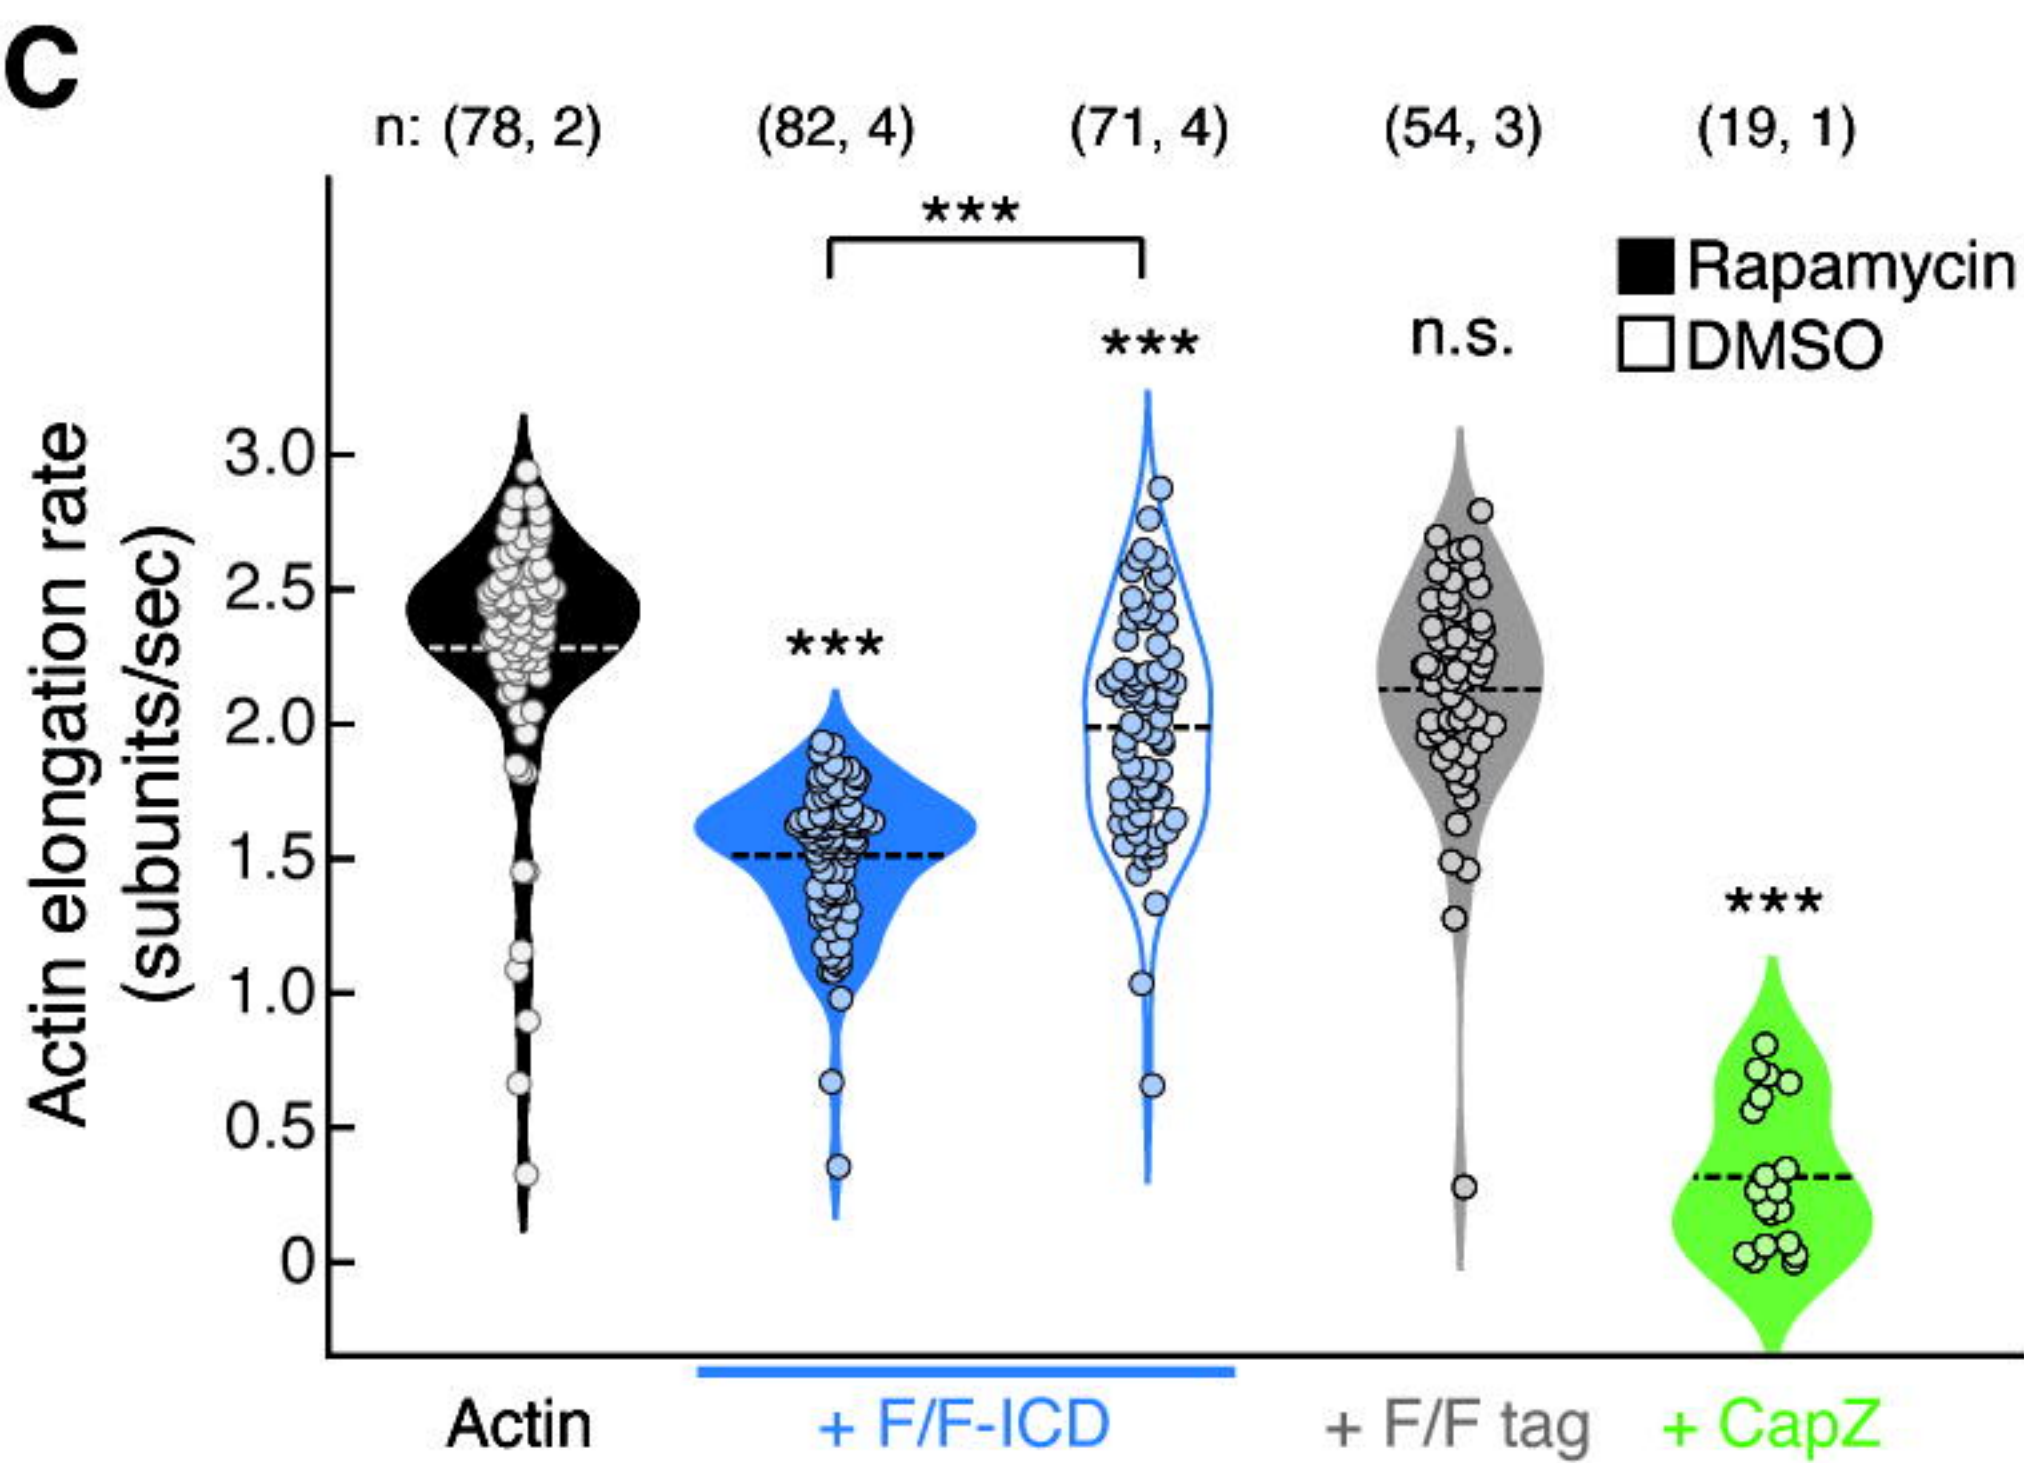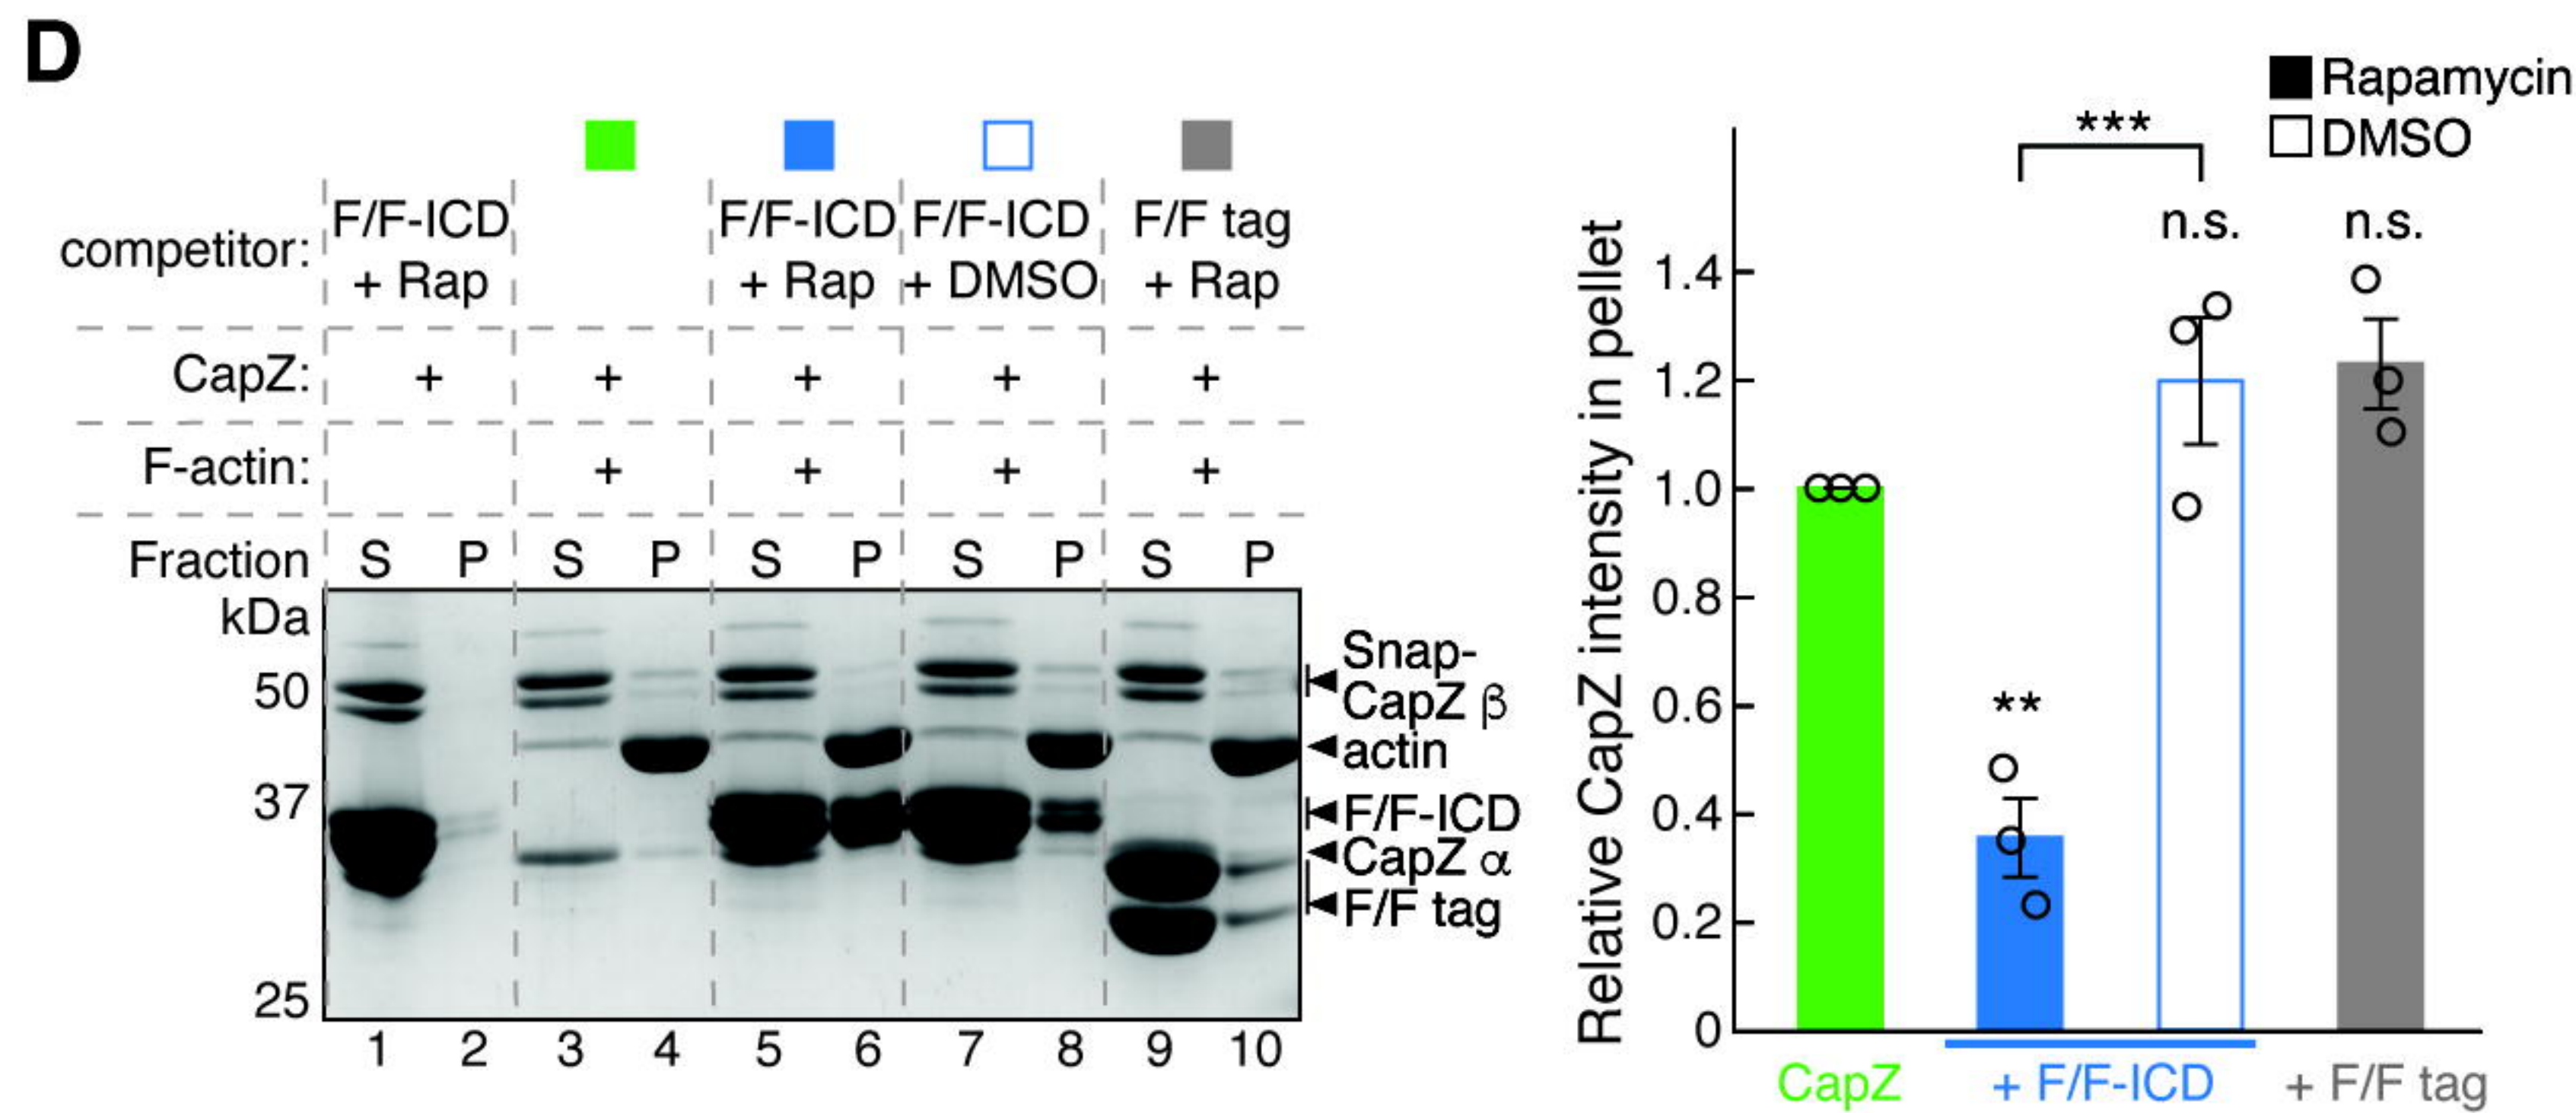



**A**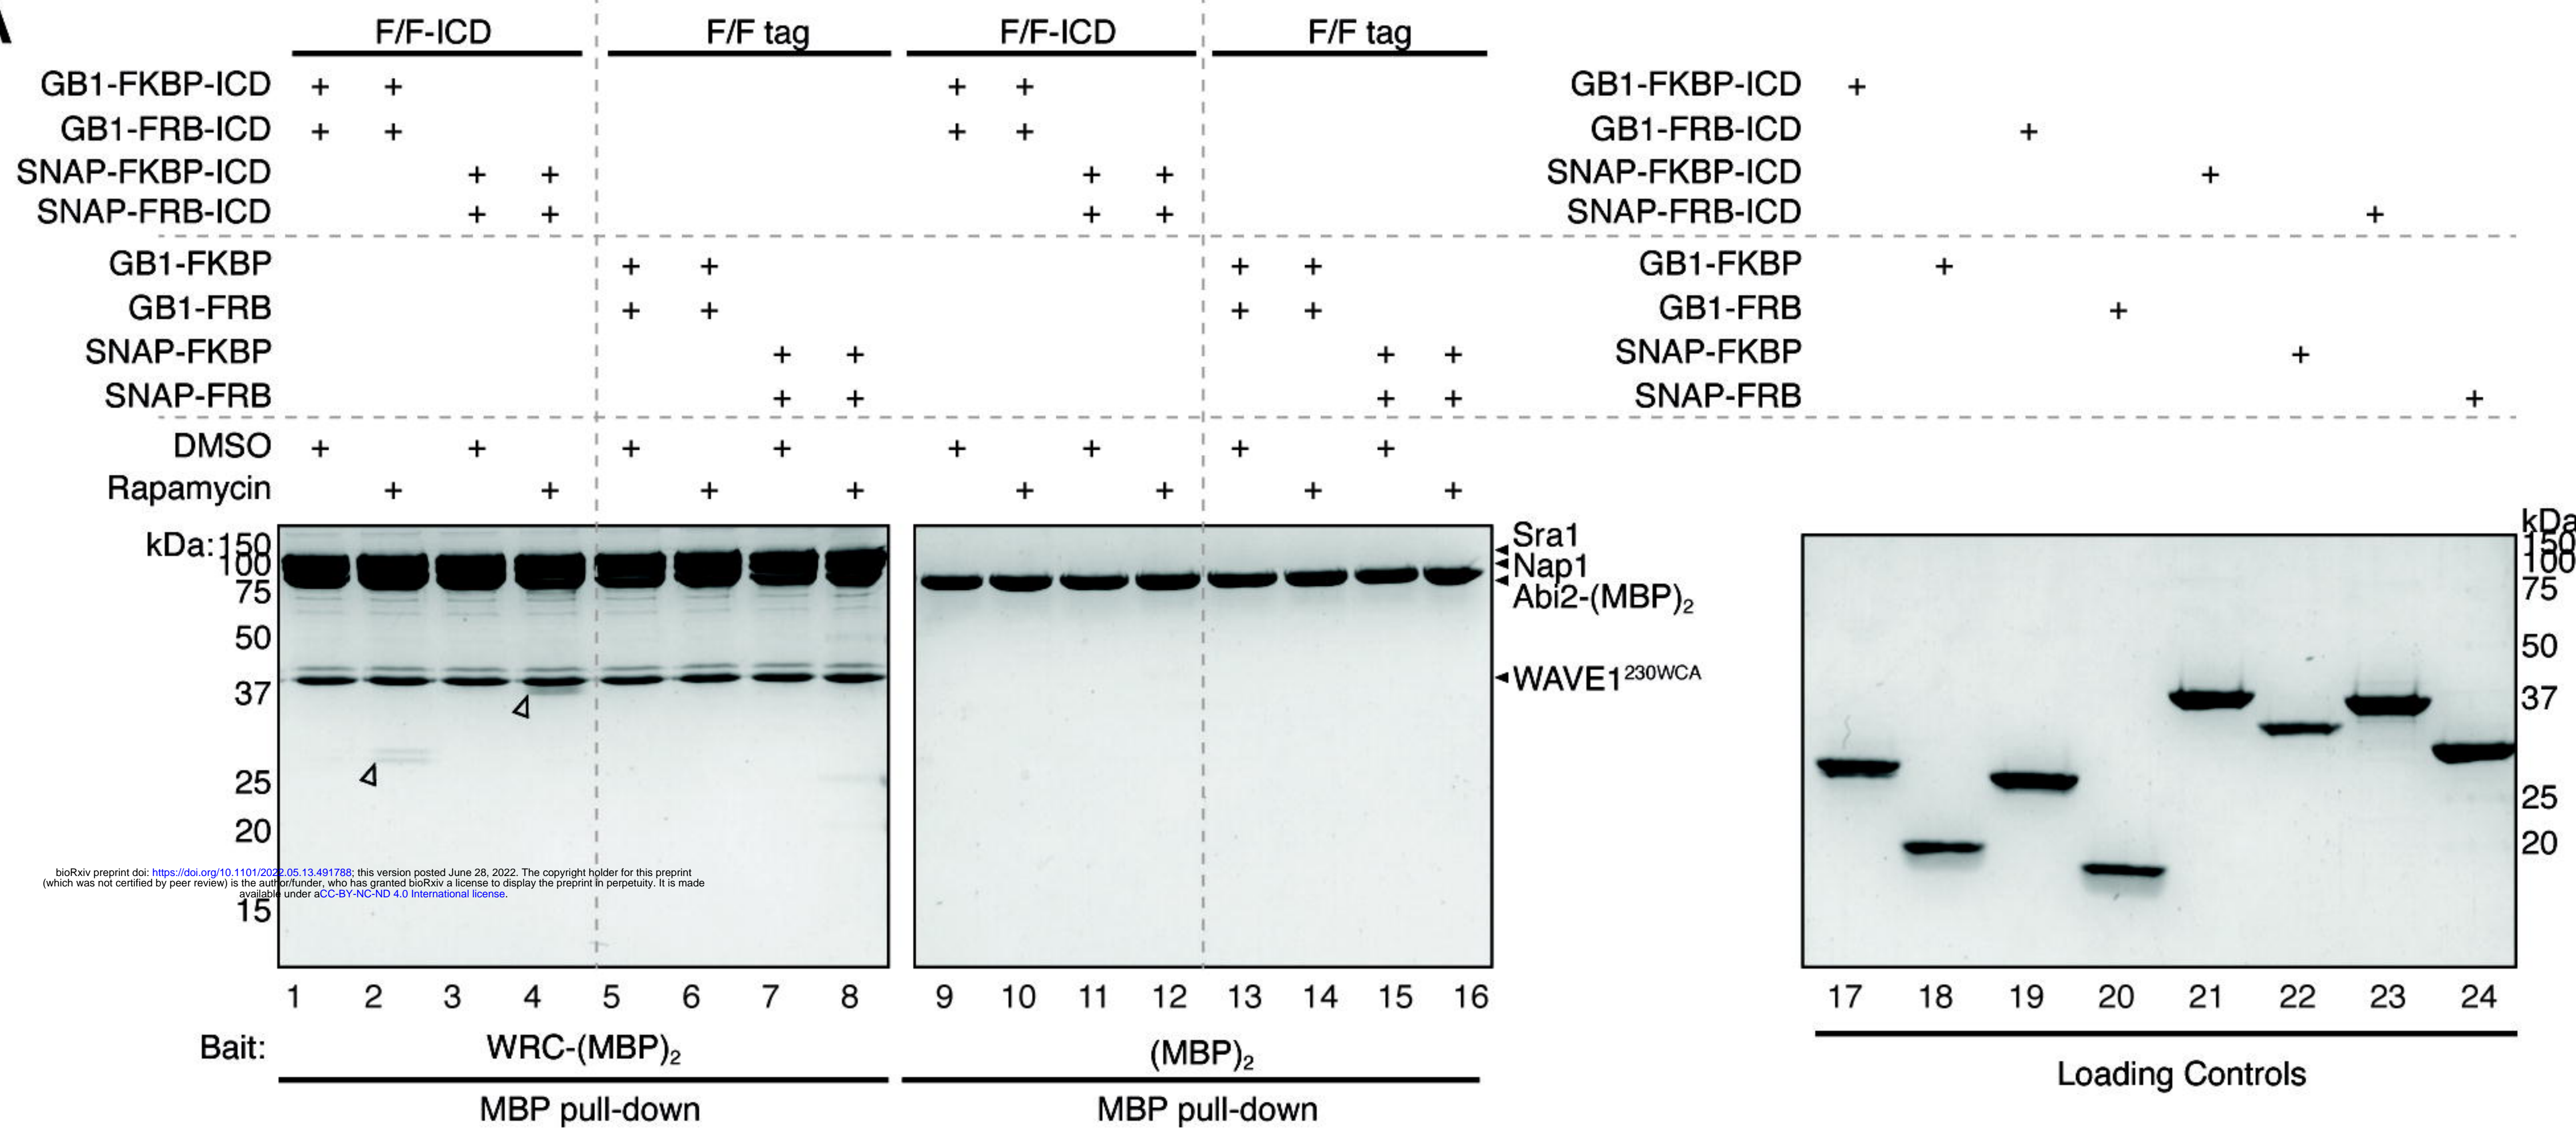**B**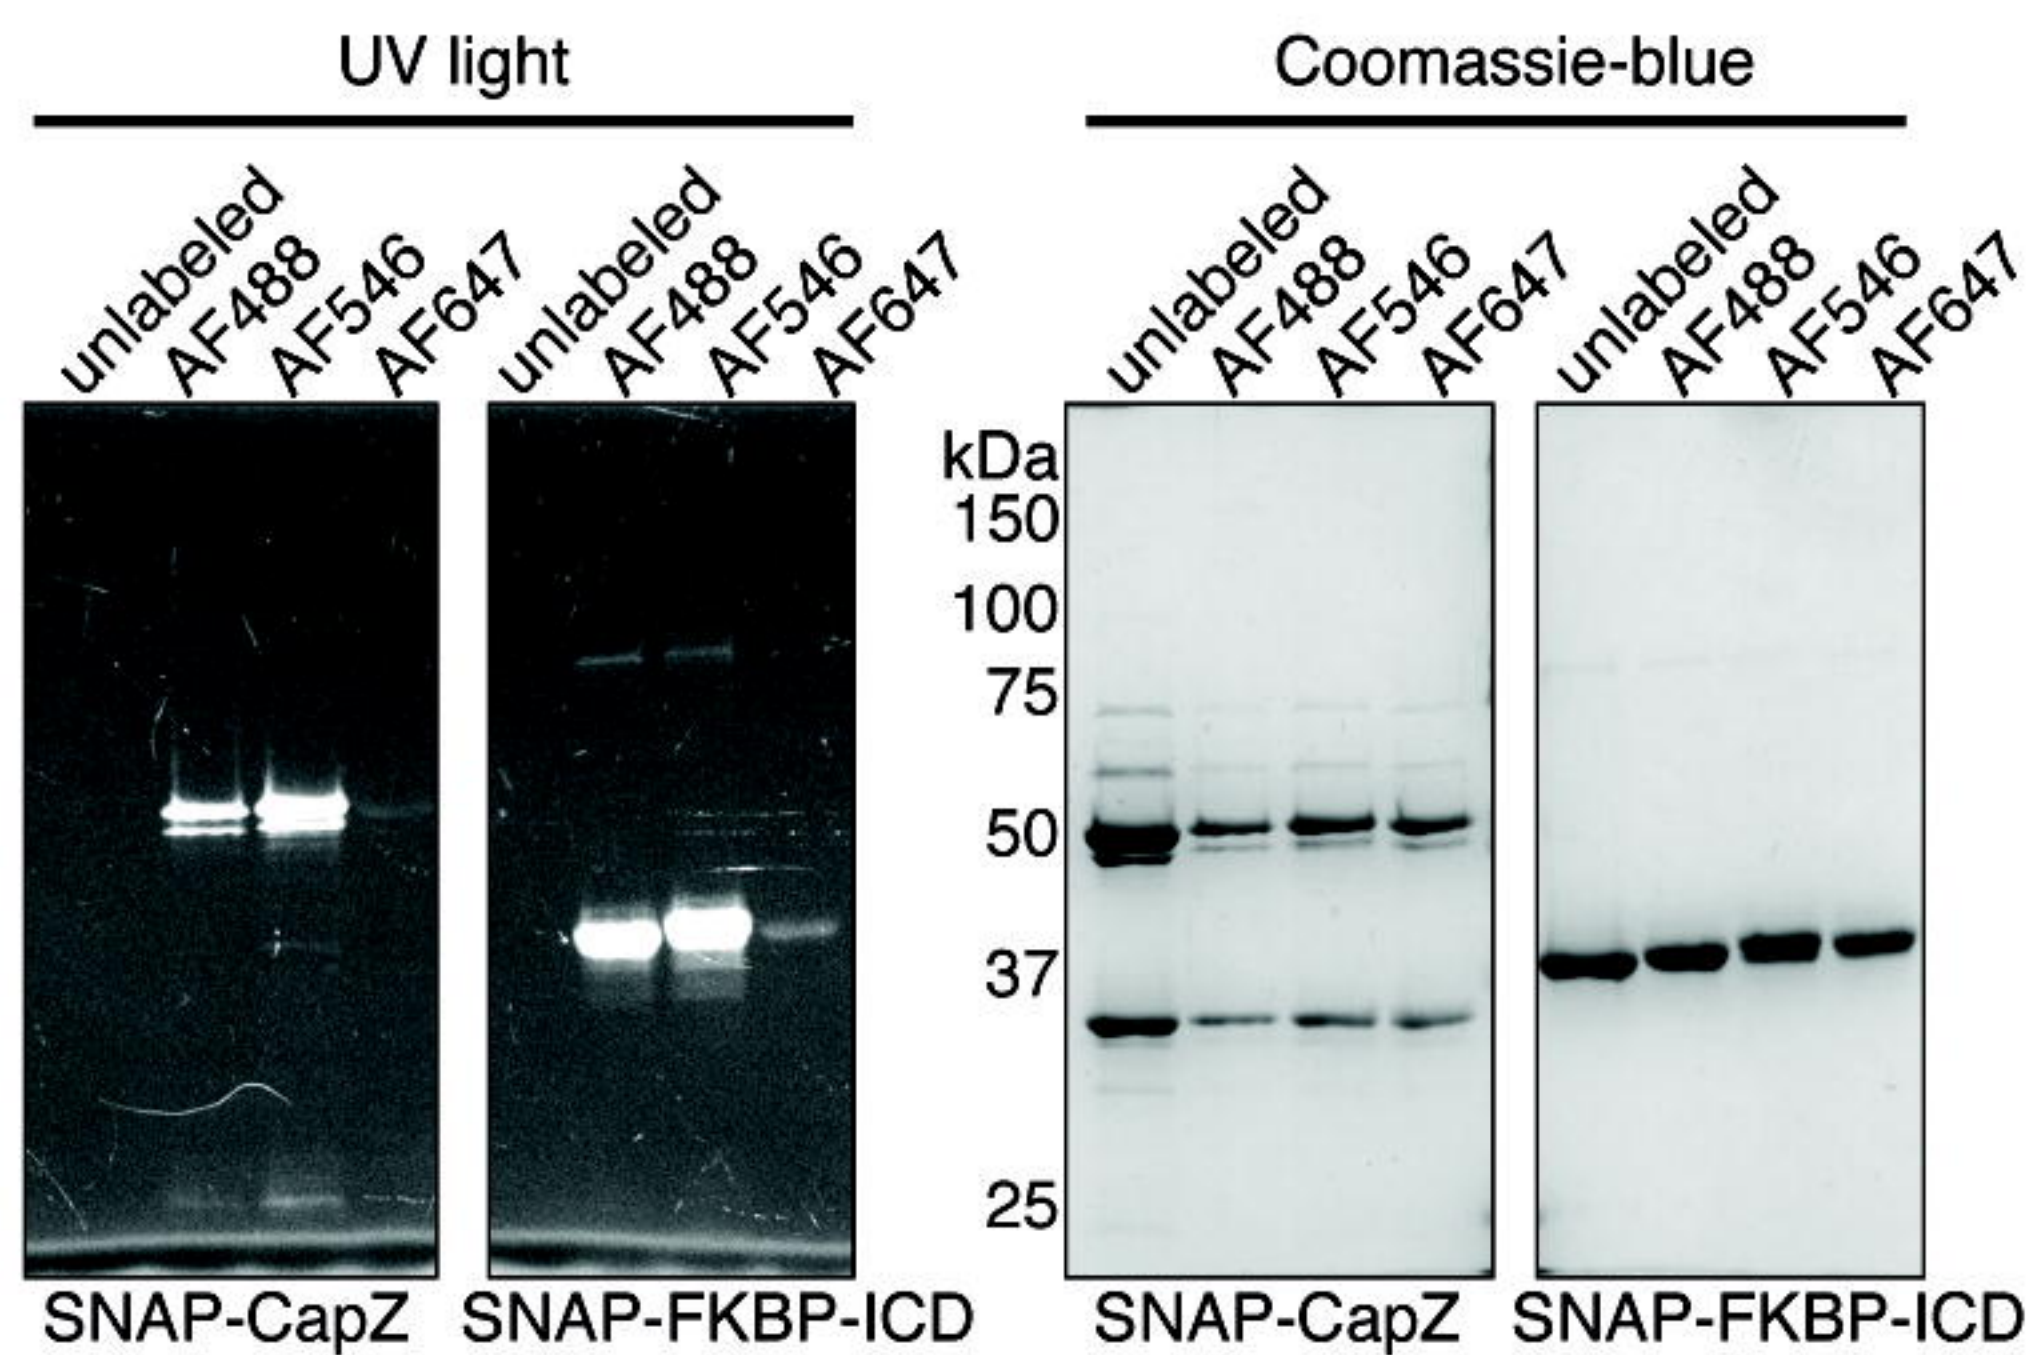**C**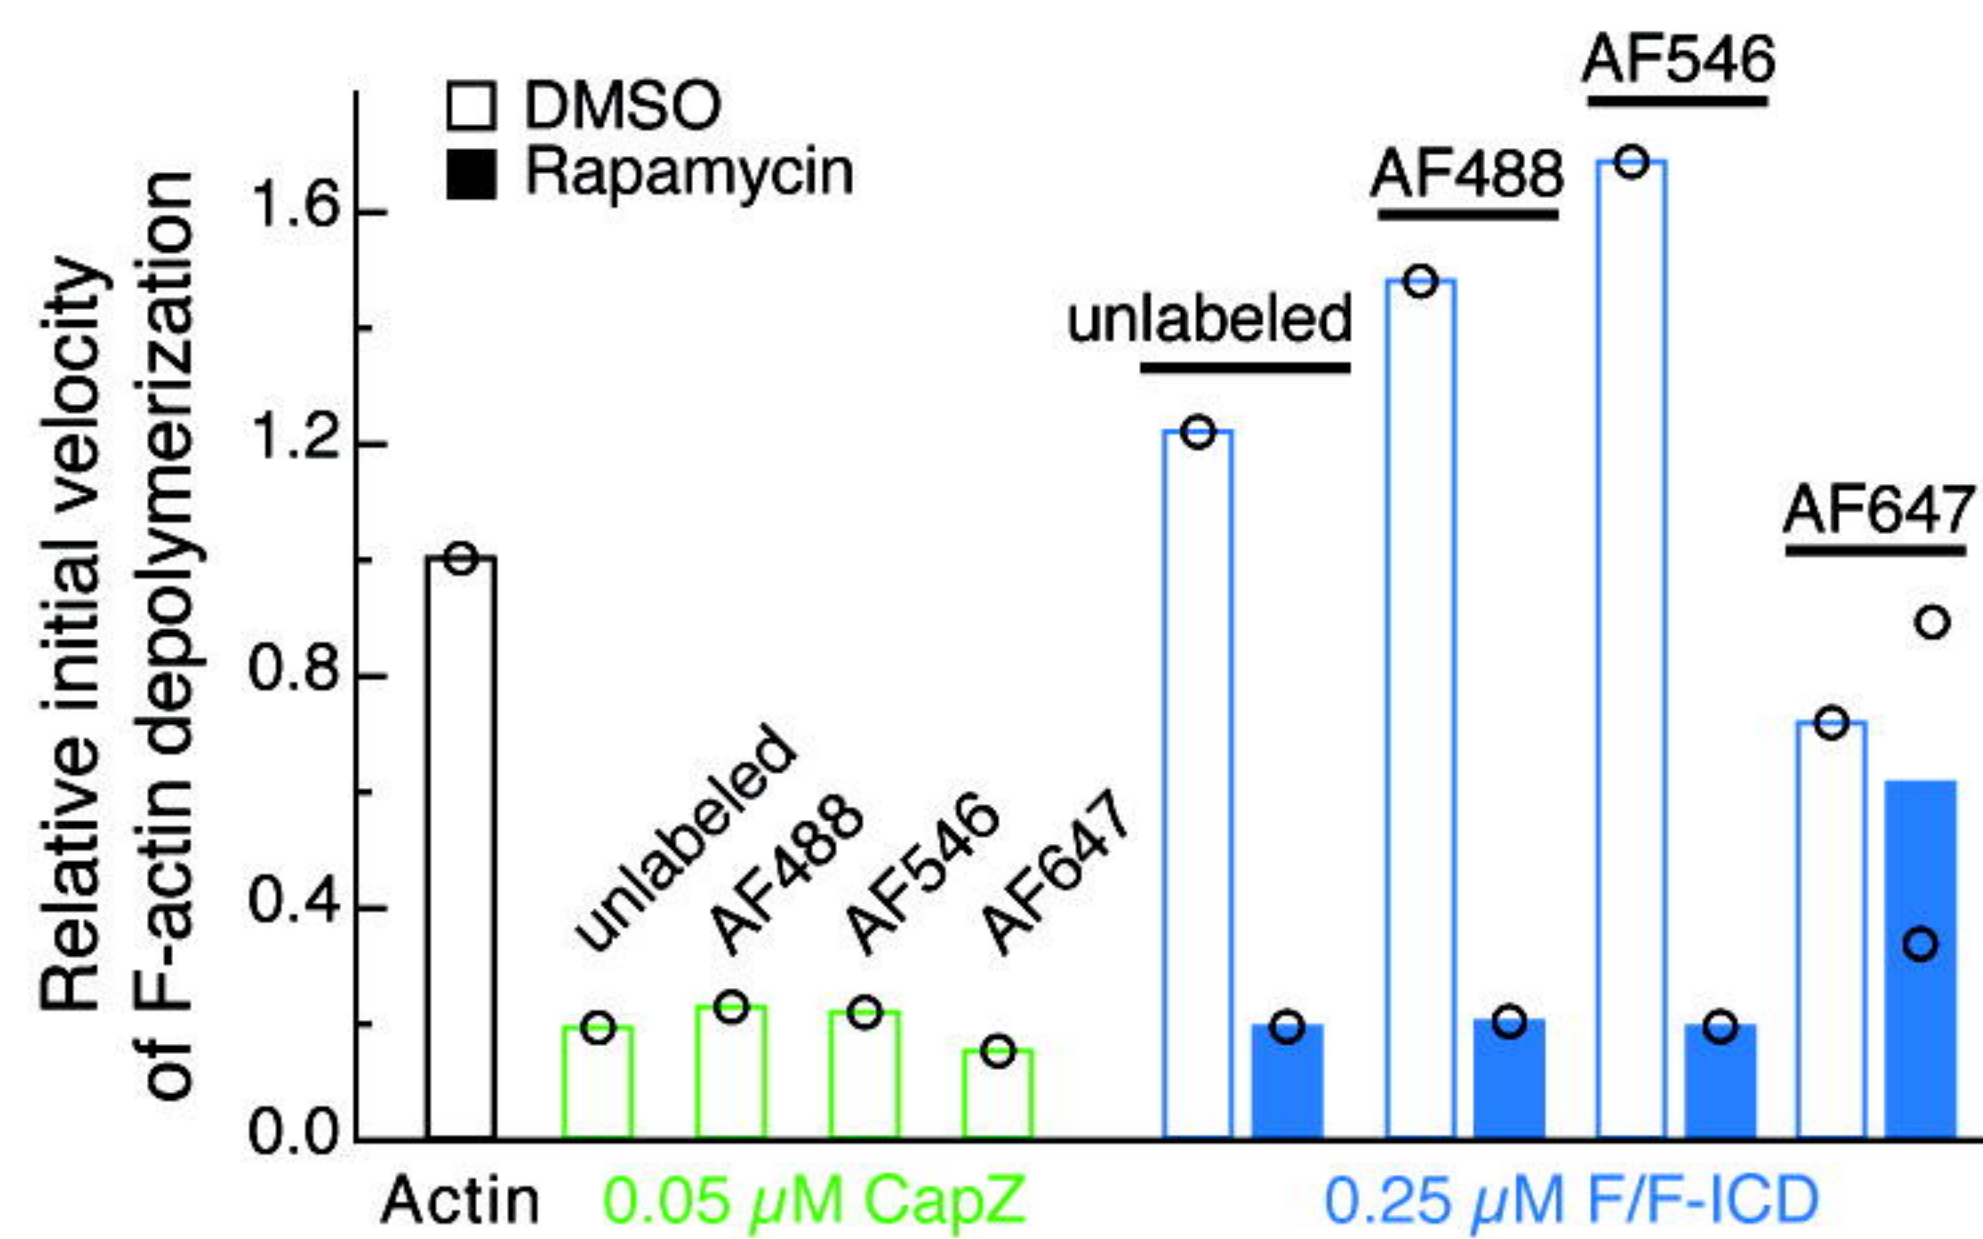



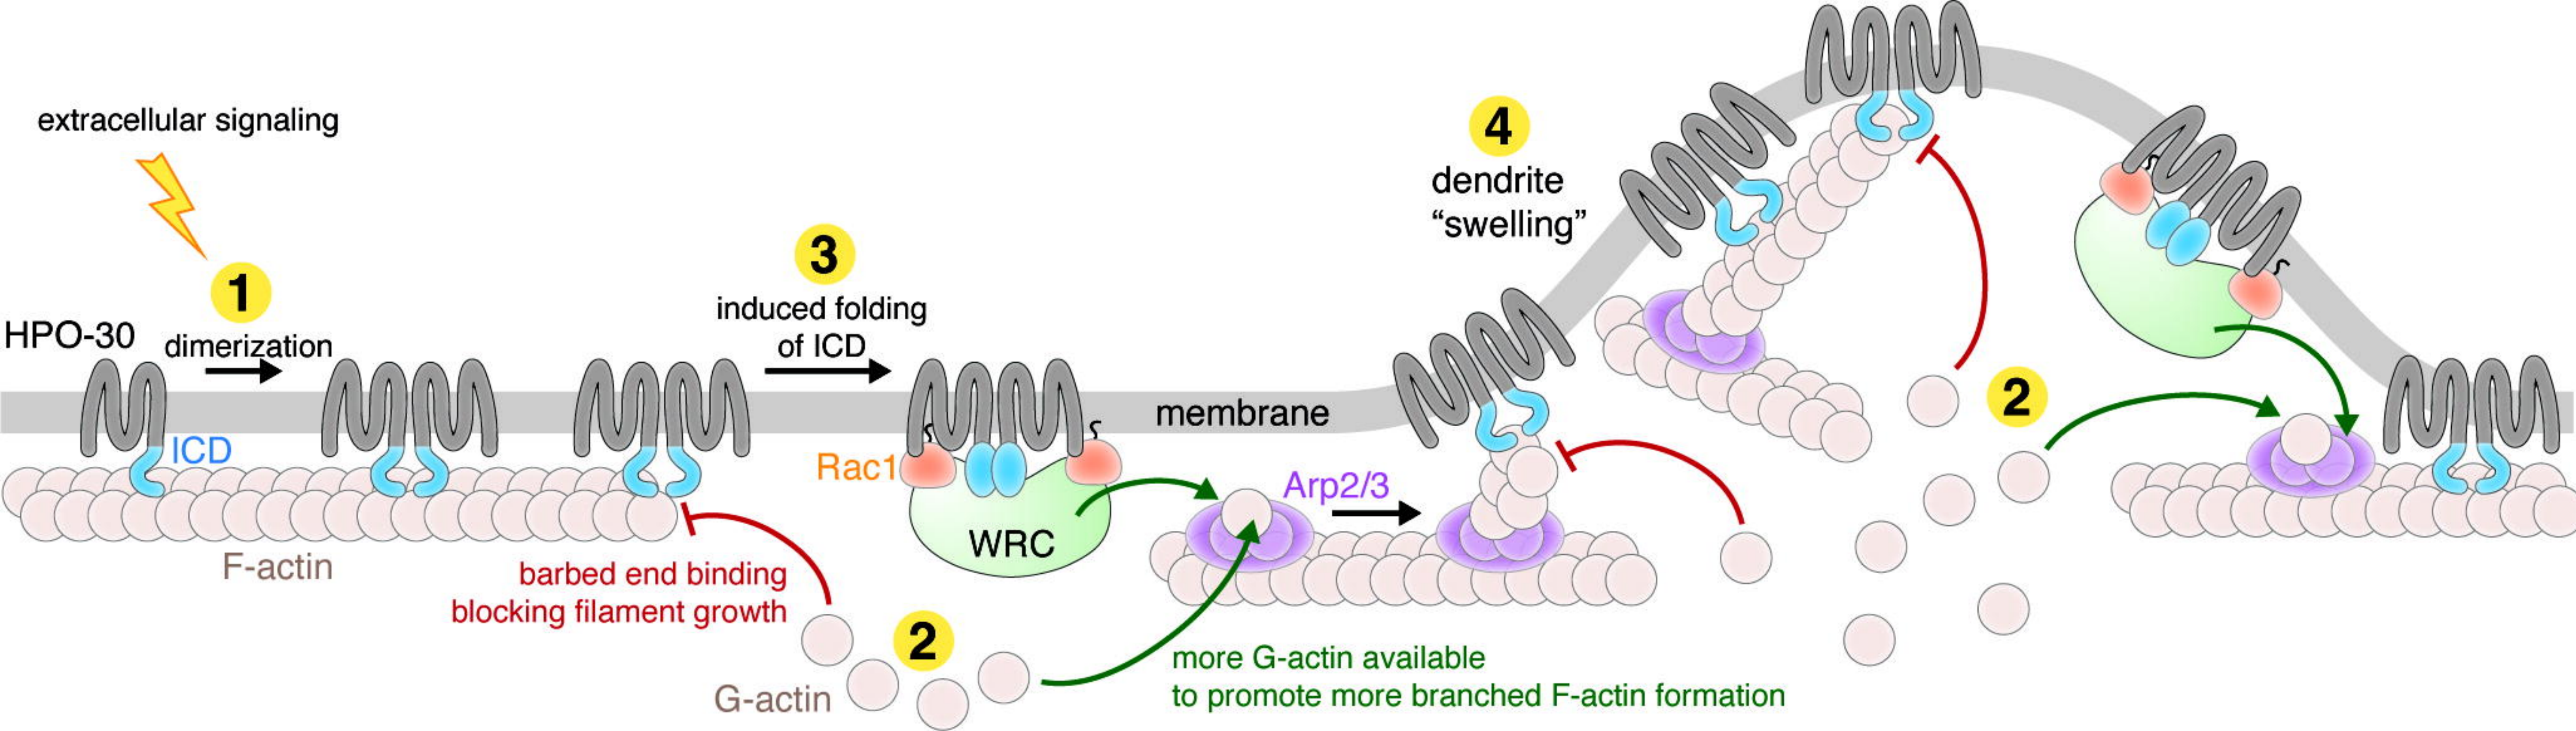

Source: https://www.biorxiv.org/content/10.1101/2022.05.13.491788v2.full.pdf
